# Supplementary material for: Genomic Blueprint of Novel Slow-Growing Bacteria with Insights into their Potential Adaptation Mechanisms in Soil Ecosystems
Source: Research Square preprint supplement (doi:10.21203/rs.3.rs-5441338/v1), 2024-12-11
Supplement: Supplementary file 1 [file 1072ea15341300a00ced2f8d.xlsx]

## Sheet: Table S1
Table S1. General stat of the genome from Tropical Savanna soil
Strains	Size	GC	contigs	N50	BUSCO	Marker Lineage	Completeness	Contamination
CER28	2557286	71.37	741	4807	92.8	o_Propionibacteriales	96.55	12.23
CER55	2583918	56.97	1287	2183	60	f__Enterobacteriaceae	63.33	13.33
CER48	3455227	67.13	781	6619	93.4	o__Rhizobiales	91.75	0.96
CER94	4099948	66.63	823	7843	94.1	f__Burkholderiaceae	97.01	0.18

## Sheet: Table S2
Table S2. Taxonomic Classification of Bacterial Isolates from [Local] Based on Average Nucleotide Identity (ANI) and Relative Evolutionary Distance (RED) Using GTDB-Tk v1.7.0
User Genome	Classification	FastANI Reference	FastANI Reference Radius	Other Related References	MSA AA Percent	RED Value	Warnings
CER28	d__Bacteria;	-	-	GCF_013778305.1, s__Nocardioides sp013...	83.16	0.9739475387
	p__Actinobacteriota;
	c__Actinomycetia;
	o__Propionibacteriales;
	f__Nocardioidaceae;
	g__Nocardioides;
	s__
CER48	d__Bacteria;	-	-	GCF_900168195.1, s__Bosea thiooxidans,...	91.36	0.9908250116	Genome not assigned to closest species as it falls outside its pre-defined ANI radius
	p__Proteobacteria;
	c__Alphaproteobacteria;
	o__Rhizobiales;
	f__Beijerinckiaceae;
	g__Bosea;
	s__
CER55	d__Bacteria;	GCF_001729805.1	95	GCF_004006055.1, s__Enterobacter cloac...	65.87
	p__Proteobacteria;
	c__Gammaproteobacteria;
	o__Enterobacterales;
	f__Enterobacteriaceae;
	g__Enterobacter;
	s__Enterobacter roggenkampii
CER94	d__Bacteria;	GCF_009663685.1	95	GCF_900104095.1, s__Cupriavidus sp9001...	97.24	-	-
	p__Proteobacteria;
	c__Gammaproteobacteria;
	o__Burkholderiales;
	f__Burkholderiaceae;
	g__Cupriavidus;
	s__Cupriavidus necator_C

## Sheet: Table S3
Table S3. Summary of Metabolic Pathways and Gene Function in Four Cerrado strains
Function	Gene.abbreviation	Gene.name	CER94	CER94.Hit.numbers	CER94.Hits	CER28	CER28.Hit.numbers	CER28.Hits	CER48	CER48.Hit.numbers	CER48.Hits	CER55.	CER55.Hit.numbers	CER55.Hits
Thermophilic specific	rgy	reverse gyrase	Absent	0	None	Absent	0	None	Absent	0	None	Absent	0	None
4-aminobutyrate aminotransferase and related aminotransferases	4-aminobutyrate aminotransferase and related aminotransferases	4-aminobutyrate aminotransferase and related aminotransferases	Absent	0	None;None;None;None;None	Present	1	None;CER28_01857;None;None;None	Absent	0	None;None;None;None;None	Absent	0	None;None;None;None;None
Aminotransferase class I and II	aminotransferase class I and II	aminotransferase class I and II	Present	1	CER94_01309	Absent	0	None	Present	1	CER48_01110	Present	1	CER55_01525
Phosphoserine aminotransferase	phosphoserine aminotransferase	phosphoserine aminotransferase	Present	1	CER94_00334	Absent	0	None	Present	1	CER48_02485	Present	1	CER55_01774
Ornithine/acetylornithine aminotransferase	ornithine/acetylornithine aminotransferase	ornithine/acetylornithine aminotransferase	Present	1	None;CER94_02811;None;None	Present	1	None;CER28_00234;None;None	Present	1	None;CER48_01740;None;None	Absent	0	None;None;None;None
Branched-chain amino acid aminotransferase/4-amino-4-deoxychorismate lyase	branched-chain amino acid aminotransferase/4-amino-4-deoxychorismate lyase	branched-chain amino acid aminotransferase/4-amino-4-deoxychorismate lyase	Present	1	None;None;CER94_00207	Present	1	CER28_01410;None;None	Present	2	CER48_02294,CER48_02689;None;None	Present	1	CER55_00156;None;None
Aspartate/tyrosine/aromatic aminotransferase	aspartate/tyrosine/aromatic aminotransferase	aspartate/tyrosine/aromatic aminotransferase	Present	3	CER94_01787;None;None;CER94_00716,CER94_02505	Present	1	CER28_01980;None;None;None	Present	1	CER48_01046;None;None;None	Absent	0	None;None;None;None
Histidinol-phosphate/aromatic aminotransferase	histidinol-phosphate/aromatic aminotransferase	histidinol-phosphate/aromatic aminotransferase	Present	2	CER94_00336,CER94_00379	Present	2	CER28_00835,CER28_00346	Present	1	CER48_01176	Absent	0	None
Serine-pyruvate aminotransferase/archaeal aspartate aminotransferase	serine-pyruvate aminotransferase/archaeal aspartate aminotransferase	serine-pyruvate aminotransferase/archaeal aspartate aminotransferase	Present	1	CER94_00625	Absent	0	None	Absent	0	None	Absent	0	None
Acetate => Acetaldehyde	acetate => acetaldehyde	acetate => acetaldehyde	Absent	0	None;None	Absent	0	None;None	Absent	0	None;None	Present	1	None;CER55_02047
Acetaldehyde => Ethanol	acetaldehyde => ethanol	acetaldehyde => ethanol	Absent	0	None;None;None;None;None;None;None	Absent	0	None;None;None;None;None;None;None	Present	1	None;CER48_02276;None;None;None;None;None	Absent	0	None;None;None;None;None;None;None
Fatty acid degradation	acyl-CoA dehydrogenase	acyl-CoA dehydrogenase	Present	9	CER94_02742,CER94_00668,CER94_02433,CER94_03446,CER94_00133;None;None;CER94_02433,CER94_03446;CER94_00353,CER94_02349;None;None;None;None	Present	9	CER28_00492,CER28_00144,CER28_01589,CER28_00328,CER28_01299;CER28_00603;None;CER28_01494;CER28_01763;None;CER28_00328;None;None	Present	6	CER48_00106,CER48_00900,CER48_01995,CER48_00128;None;None;None;CER48_01568,CER48_02452;None;None;None;None	Present	1	None;None;CER55_01420;None;None;None;None;None;None
Protocatechuate/Catechol degradation	catA	catechol 1,2-dioxygenase	Absent	0	None	Absent	0	None	Absent	0	None	Absent	0	None
Phenol => Benzoyl-CoA	ubiX	flavin prenyltransferase	Present	2	CER94_00820,CER94_01386	Absent	0	None	Absent	0	None	Present	3	CER55_00717,CER55_02170,CER55_01602
Phenol => Benzoyl-CoA	bsdC	vanillate/4-hydroxybenzoate decarboxylase subunit C	Absent	0	None	Absent	0	None	Absent	0	None	Present	1	CER55_01934
Benzoyl-CoA reduction	bcrC	benzoyl-CoA reductase subunit C	Absent	0	None	Absent	0	None	Absent	0	None	Absent	0	None
Benzoyl-CoA reduction	bcrB	benzoyl-CoA reductase subunit B	Absent	0	None	Absent	0	None	Absent	0	None	Absent	0	None
Benzoyl-CoA reduction	bcrA	benzoyl-CoA reductase subunit A	Absent	0	None	Absent	0	None	Absent	0	None	Absent	0	None
Benzoyl-CoA reduction	bcrD	benzoyl-CoA reductase subunit D	Absent	0	None	Absent	0	None	Absent	0	None	Absent	0	None
Cellulose degrading	cellobiosidase	cellobiosidase	Absent	0	None	Absent	0	None	Absent	0	None	Absent	0	None
Cellulose degrading	cellulase	cellulase	Present	1	None;CER94_00588	Absent	0	None;None	Present	1	None;CER48_02921	Absent	0	None;None
Cellulose degrading	beta-glucosidase	beta-glucosidase	Present	1	None;CER94_01829;None	Present	4	None;CER28_01858,CER28_01318,CER28_01208;CER28_01382	Absent	0	None;None;None	Present	1	None;CER55_00515;None
Hemicullulose debranching	arabinosidase	arabinosidase	Absent	0	None;None	Absent	0	None;None	Absent	0	None;None	Absent	0	None;None
Hemicullulose debranching	beta-glucuronidase	beta-glucuronidase	Absent	0	None	Absent	0	None	Absent	0	None	Absent	0	None
Hemicullulose debranching	alpha-L-rhamnosidase	alpha-L-rhamnosidase	Absent	0	None	Absent	0	None	Absent	0	None	Absent	0	None
Endohemicellulases	mannan endo-1,4-beta-mannosidase	mannan endo-1,4-beta-mannosidase	Absent	0	None;None	Absent	0	None;None	Absent	0	None;None	Absent	0	None;None
Endohemicellulases	alpha-D-xyloside xylohydrolase	alpha-D-xyloside xylohydrolase	Absent	0	None	Absent	0	None	Absent	0	None	Absent	0	None
Other oligosaccharide degrading	beta-xylosidase	beta-xylosidase	Present	1	CER94_01036	Present	1	CER28_00945	Absent	0	None	Present	1	CER55_00005
Other oligosaccharide degrading	beta-mannosidase	beta-mannosidase	Absent	0	None	Absent	0	None	Absent	0	None	Absent	0	None
Other oligosaccharide degrading	beta-galactosidase	beta-galactosidase	Absent	0	None;None;None	Absent	0	None;None;None	Absent	0	None;None;None	Absent	0	None;None;None
Amylolytic enzymes	alpha-amylase	alpha-amylase	Absent	0	None;None;None	Present	2	CER28_01409;CER28_00163;None	Absent	0	None;None;None	Absent	0	None;None;None
Amylolytic enzymes	glucoamylase	glucoamylase	Absent	0	None	Present	1	CER28_02008	Absent	0	None	Absent	0	None
Amylolytic enzymes	pullulanase	pullulanase	Absent	0	None	Absent	0	None	Absent	0	None	Absent	0	None
Amylolytic enzymes	isoamylase	isoamylase	Present	1	CER94_02396	Absent	0	None	Present	1	CER48_01553	Absent	0	None
Chitin degrading	chitiniase	chitiniase	Absent	0	None;None	Absent	0	None;None	Absent	0	None;None	Absent	0	None;None
Chitin degrading	hexosaminidase	hexosaminidase	Present	1	CER94_01464;None;None	Present	2	CER28_00360,CER28_01158;None;None	Present	1	CER48_02203;None;None	Present	1	None;CER55_00029;None
Pyruvate oxidation	porA	pyruvate ferredoxin oxidoreductase alpha subunit	Absent	0	None	Absent	0	None	Absent	0	None	Absent	0	None
Alcohol utilization	adh	alcohol dehydrogenase	Absent	0	None	Absent	0	None	Present	1	CER48_02276	Absent	0	None
Lactate utilization	ldh	L-lactate dehydrogenase	Absent	0	None	Absent	0	None	Absent	0	None	Absent	0	None
Acetogenesis	acdA	acetyl coenzyme A synthetase (ADP forming), alpha domain	Absent	0	None	Absent	0	None	Absent	0	None	Absent	0	None
Acetogenesis	ack	acetate kinase	Present	1	CER94_03225	Absent	0	None	Absent	0	None	Present	1	CER55_00246
Acetogenesis	pta	phosphate acetyltransferase	Absent	0	None	Absent	0	None	Absent	0	None	Present	2	CER55_00245,CER55_00906
Acetate to acetyl-CoA	acs	acetyl-CoA synthetase	Present	2	CER94_01943,CER94_02496	Present	1	CER28_01728	Present	1	CER48_01479	Present	1	CER55_01928
Pyruvate <=> acetyl-CoA + formate	pflD	formate C-acetyltransferase	Absent	0	None	Absent	0	None	Absent	0	None	Absent	0	None
Methanol oxidation	mxaF	methanol dehydrogenase (cytochrome c) subunit 1	Absent	0	None	Absent	0	None	Absent	0	None	Absent	0	None
Methanol oxidation	mdh	methanol dehydrogenase	Absent	0	None	Absent	0	None	Absent	0	None	Absent	0	None
Methyl amine -> formaldehyde	mauA	methylamine dehydrogenase light chain	Absent	0	None	Absent	0	None	Absent	0	None	Absent	0	None
Methyl amine -> formaldehyde	mauB	methylamine dehydrogenase heavy chain	Absent	0	None	Absent	0	None	Absent	0	None	Absent	0	None
Formaldehyde oxidation	fdhA	glutathione-independent formaldehyde dehydrogenase	Absent	0	None	Absent	0	None	Absent	0	None	Absent	0	None
Formaldehyde oxidation	fghA	S-formylglutathione hydrolase	Present	1	CER94_03240	Absent	0	None	Present	1	CER48_01948	Absent	0	None
Formaldehyde oxidation	frmA	S-(hydroxymethyl)glutathione dehydrogenase / alcohol dehydrogenase	Present	2	CER94_03336,CER94_03239	Absent	0	None	Present	1	CER48_01947	Absent	0	None
Formaldehyde oxidation	mycoS_dep_FDH	S-(hydroxymethyl)mycothiol dehydrogenase	Absent	0	None	Present	1	CER28_02200	Absent	0	None	Absent	0	None
Formaldehyde oxidation	fae	5,6,7,8-tetrahydromethanopterin hydro-lyase	Absent	0	None	Absent	0	None	Absent	0	None	Absent	0	None
Formate oxidation	fdoG	formate dehydrogenase major subunit	Present	1	CER94_01767	Absent	0	None	Present	1	CER48_00261	Absent	0	None
Formate oxidation	fdwB	formate dehydrogenase beta subunit	Absent	0	None	Absent	0	None	Absent	0	None	Absent	0	None
Formate oxidation	fdoH	formate dehydrogenase iron-sulfur subunit	Present	1	CER94_01472	Present	1	CER28_00214	Present	1	CER48_01960	Present	1	CER55_01175
Formate oxidation	fdhA	formate dehydrogenase (coenzyme F420) alpha subunit	Absent	0	None	Absent	0	None	Absent	0	None	Absent	0	None
Formate oxidation	fdhB	formate dehydrogenase (coenzyme F420) beta subunit	Absent	0	None	Absent	0	None	Absent	0	None	Absent	0	None
Aerobic CO oxidation	coxS	aerobic carbon-monoxide dehydrogenase small subunit	Present	2	CER94_00003,CER94_00822	Present	2	CER28_00971,CER28_01181	Present	1	CER48_02258	Absent	0	None
Aerobic CO oxidation	coxM	aerobic carbon-monoxide dehydrogenase medium subunit	Present	2	CER94_00823,CER94_00001	Present	2	CER28_00969,CER28_01180	Present	1	CER48_02260	Absent	0	None
Aerobic CO oxidation	coxL	aerobic carbon-monoxide dehydrogenase large subunit	Present	1	CER94_00002	Present	3	CER28_00970,CER28_00484,CER28_01182	Present	3	CER48_02259,CER48_02206,CER48_02423	Absent	0	None
Methane oxidation - Partculate methane monooxygenase	pmoA	methane/ammonia monooxygenase subunit A	Absent	0	None	Absent	0	None	Absent	0	None	Absent	0	None
Methane oxidation - Partculate methane monooxygenase	pmoB	methane/ammonia monooxygenase subunit B	Absent	0	None	Absent	0	None	Absent	0	None	Absent	0	None
Methane oxidation - Partculate methane monooxygenase	pmoC	methane/ammonia monooxygenase subunit C	Absent	0	None	Absent	0	None	Absent	0	None	Absent	0	None
Methane oxidation - Soluble methane monoxygenase	mmoB	methane monooxygenase regulatory protein B	Absent	0	None	Absent	0	None	Absent	0	None	Absent	0	None
Methane oxidation - Soluble methane monoxygenase	mmoD	methane monooxygenase component D	Absent	0	None	Absent	0	None	Absent	0	None	Absent	0	None
Methane production	mcrA	methyl-coenzyme M reductase alpha subunit	Absent	0	None	Absent	0	None	Absent	0	None	Absent	0	None
Methane production	mcrB	methyl-coenzyme M reductase beta subunit	Absent	0	None	Absent	0	None	Absent	0	None	Absent	0	None
Methane production	mcrC	methyl-coenzyme M reductase subunit C	Absent	0	None	Absent	0	None	Absent	0	None	Absent	0	None
CBB cycle - Rubisco	Form I	Form I RuBisCO large subunit	Absent	0	None	Absent	0	None	Absent	0	None	Absent	0	None
CBB cycle - Rubisco	Form II	Form II RuBisCO large subunit	Absent	0	None	Absent	0	None	Absent	0	None	Absent	0	None
3 Hydroxypropionate cycle	K14469	propionyl-CoA synthase	Absent	0	None	Absent	0	None	Absent	0	None	Absent	0	None
3 Hydroxypropionate cycle	mcr	malonyl-CoA reductase / 3-hydroxypropionate dehydrogenase (NADP+)	Absent	0	None	Absent	0	None	Absent	0	None	Absent	0	None
3HP/4HB	K14466	4-hydroxybutyrate---CoA ligase (ADP-forming)	Absent	0	None	Absent	0	None	Absent	0	None	Absent	0	None
3HP/4HB or DC/4-HB	K18861	4-hydroxybutyrate---CoA ligase (ADP-forming)	Absent	0	None	Absent	0	None	Absent	0	None	Absent	0	None
DC/4-HB	4hbl	4-hydroxybutyrate---CoA ligase (ADP-forming)	Absent	0	None	Absent	0	None	Absent	0	None	Absent	0	None
Wood Ljungdahl pathway	cdhD	acetyl-CoA decarbonylase/synthase, CODH/ACS complex subunit delta	Absent	0	None	Absent	0	None	Absent	0	None	Absent	0	None
Wood Ljungdahl pathway	cdhE	acetyl-CoA decarbonylase/synthase, CODH/ACS complex subunit gamma	Absent	0	None	Absent	0	None	Absent	0	None	Absent	0	None
Wood Ljungdahl pathway	cooS	anaerobic carbon-monoxide dehydrogenase catalytic subunit	Absent	0	None	Absent	0	None	Absent	0	None	Absent	0	None
Reverse TCA cycle	aclA	ATP-citrate lyase alpha-subunit	Absent	0	None	Absent	0	None	Absent	0	None	Absent	0	None
Reverse TCA cycle	aclB	ATP-citrate lyase beta-subunit	Absent	0	None	Absent	0	None	Absent	0	None	Absent	0	None
Ammonia oxidation	amoA	methane/ammonia monooxygenase subunit A	Absent	0	None	Absent	0	None	Absent	0	None	Absent	0	None
Ammonia oxidation	amoB	methane/ammonia monooxygenase subunit B	Absent	0	None	Absent	0	None	Absent	0	None	Absent	0	None
Ammonia oxidation	amoC	methane/ammonia monooxygenase subunit C	Absent	0	None	Absent	0	None	Absent	0	None	Absent	0	None
N2 fixation	anfD	nitrogenase iron-iron protein, alpha subunit	Absent	0	None	Absent	0	None	Absent	0	None	Absent	0	None
N2 fixation	anfK	nitrogenase iron-iron protein, beta subunit	Absent	0	None	Absent	0	None	Absent	0	None	Absent	0	None
N2 fixation	anfG	nitrogenase iron-iron protein, delta subunit	Absent	0	None	Absent	0	None	Absent	0	None	Absent	0	None
N2 fixation	nifD	nitrogenase molybdenum-iron protein alpha chain	Absent	0	None	Absent	0	None	Absent	0	None	Absent	0	None
N2 fixation	nifK	nitrogenase molybdenum-iron protein beta chain	Absent	0	None	Absent	0	None	Absent	0	None	Absent	0	None
N2 fixation	vnfD	nitrogenase vanadium-iron protein, alpha chain	Absent	0	None	Absent	0	None	Absent	0	None	Absent	0	None
N2 fixation	vnfK	nitrogenase vanadium-iron protein, beta chain	Absent	0	None	Absent	0	None	Absent	0	None	Absent	0	None
N2 fixation	vnfG	nitrogenase vanadium-iron protein, delta chain	Absent	0	None	Absent	0	None	Absent	0	None	Absent	0	None
N2 fixation	nifH	nitrogenase iron protein	Absent	0	None	Absent	0	None	Absent	0	None	Absent	0	None
Nitrite oxidation	nxrA	nitrate reductase / nitrite oxidoreductase, alpha subunit	Absent	0	None	Absent	0	None	Absent	0	None	Absent	0	None
Nitrite oxidation	nxrB	nitrate reductase / nitrite oxidoreductase, beta subunit	Absent	0	None	Absent	0	None	Absent	0	None	Absent	0	None
Nitrate reduction	napA	periplasmic nitrate reductase NapA	Absent	0	None	Absent	0	None	Present	1	CER48_02044	Absent	0	None
Nitrate reduction	napB	cytochrome c-type protein NapB	Absent	0	None	Absent	0	None	Present	1	CER48_02045	Absent	0	None
Nitrate reduction	narG	nitrate reductase / nitrite oxidoreductase, alpha subunit	Absent	0	None	Present	1	CER28_00455	Absent	0	None	Present	1	CER55_00757
Nitrate reduction	narH	nitrate reductase / nitrite oxidoreductase, beta subunit	Absent	0	None	Present	1	CER28_00456	Absent	0	None	Present	2	CER55_00758,CER55_01048
Nitrite reduction to ammonia	nrfH	cytochrome c nitrite reductase small subunit	Absent	0	None	Absent	0	None	Absent	0	None	Absent	0	None
Nitrite reduction to ammonia	nrfA	nitrite reductase (cytochrome c-552)	Absent	0	None	Absent	0	None	Absent	0	None	Absent	0	None
Nitrite reduction to ammonia	nrfD	cytochrome c nitrite reductase, NrfD subunit	Absent	0	None	Absent	0	None	Absent	0	None	Absent	0	None
Nitrite reduction to ammonia	nirB	nitrite reductase (NADH) large subunit	Present	1	CER94_01908	Absent	0	None	Absent	0	None	Present	1	CER55_00753
Nitrite reduction to ammonia	nirD	nitrite reductase (NADH) small subunit	Present	1	CER94_01907	Absent	0	None	Absent	0	None	Present	1	CER55_02138
Nitrite reduction	nirK	nitrite reductase (NO-forming)	Absent	0	None	Absent	0	None	Absent	0	None	Absent	0	None
Nitrite reduction	nirS	nitrite reductase (NO-forming) / hydroxylamine reductase	Absent	0	None	Absent	0	None	Absent	0	None	Absent	0	None
Nitrite reduction	octR	nitrite reductase (Octaheme c-type cytochrome Shewanella-type)	Absent	0	None	Absent	0	None	Absent	0	None	Absent	0	None
Nitric oxide reduction	norB	nitric oxide reductase subunit B	Absent	0	None	Absent	0	None	Absent	0	None	Absent	0	None
Nitric oxide reduction	norC	nitric oxide reductase subunit C	Absent	0	None	Absent	0	None	Absent	0	None	Absent	0	None
Nitrous oxide reduction	nosD	nitrous oxidase accessory protein	Absent	0	None	Absent	0	None	Absent	0	None	Absent	0	None
Nitrous oxide reduction	nosZ	nitrous-oxide reductase	Absent	0	None	Absent	0	None	Absent	0	None	Absent	0	None
Anammox	hzoA	hydroxylamine dehydrogenase, alpha subunit	Absent	0	None	Absent	0	None	Absent	0	None	Absent	0	None
Anammox	hzsA	hydrazine synthase subunit, alpha subunit	Absent	0	None	Absent	0	None	Absent	0	None	Absent	0	None
Sulfide oxidation	fccB	flavocytochrome c sulphide dehydrogenase, flavin-binding	Absent	0	None	Absent	0	None	Absent	0	None	Absent	0	None
Sulfide oxidation	sqr	sulfide:quinone oxidoreductase	Absent	0	None	Absent	0	None	Absent	0	None	Absent	0	None
Sulfite reduction	dsrD	dissimilatory sulfite reductase delta subunit	Absent	0	None	Absent	0	None	Absent	0	None	Absent	0	None
Sulfur oxidation	dsrA	dissimilatory sulfite reductase alpha subunit	Absent	0	None	Absent	0	None	Absent	0	None	Absent	0	None
Sulfur oxidation	dsrB	dissimilatory sulfite reductase beta subunit	Absent	0	None	Absent	0	None	Absent	0	None	Absent	0	None
Sulfur oxidation	sdo	sulfur dioxygenase	Absent	0	None	Absent	0	None	Absent	0	None	Absent	0	None
Sulfur oxidation/reduction	sor	sulfur oxygenase/reductase	Absent	0	None	Absent	0	None	Absent	0	None	Absent	0	None
Sulfur reduction	sreA	sulfur reductase molybdopterin subunit	Absent	0	None	Absent	0	None	Absent	0	None	Absent	0	None
Sulfur reduction	sreB	sulfur reductase FeS subunit	Absent	0	None	Absent	0	None	Absent	0	None	Absent	0	None
Sulfur reduction	sreC	sulfur reductase membrane anchor	Absent	0	None	Absent	0	None	Absent	0	None	Absent	0	None
Thiosulfate oxidation	soxB	S-sulfosulfanyl-L-cysteine sulfohydrolase	Present	1	CER94_01932	Absent	0	None	Absent	0	None	Absent	0	None
Thiosulfate oxidation	soxY	sulfur-oxidizing protein SoxY	Present	1	CER94_01938	Absent	0	None	Absent	0	None	Absent	0	None
Thiosulfate oxidation	soxC	sulfane dehydrogenase subunit SoxC	Absent	0	None	Absent	0	None	Absent	0	None	Absent	0	None
Sulfite reduction	asrA	anaerobic sulfite reductase subunit A	Absent	0	None	Absent	0	None	Absent	0	None	Absent	0	None
Sulfite reduction	asrB	anaerobic sulfite reductase subunit B	Absent	0	None	Absent	0	None	Absent	0	None	Absent	0	None
Sulfite reduction	asrC	anaerobic sulfite reductase subunit C	Absent	0	None	Absent	0	None	Absent	0	None	Absent	0	None
Sulfate reduction	aprA	adenylylsulfate reductase, subunit A	Absent	0	None	Absent	0	None	Absent	0	None	Absent	0	None
Sulfate reduction	sat	sulfate adenylyltransferase	Absent	0	None	Absent	0	None	Absent	0	None	Absent	0	None
Thiosulfate disproportionation	phsA	thiosulfate reductase / polysulfide reductase chain A	Absent	0	None	Absent	0	None	Absent	0	None	Absent	0	None
FeFe hydrogenase	fefe-group-a13	FeFe hydrogenase, H2-evolution/Electron-bifurcation	Absent	0	None	Absent	0	None	Absent	0	None	Absent	0	None
FeFe hydrogenase	fefe-group-a2	FeFe hydrogenase, H2-uptake	Absent	0	None	Absent	0	None	Absent	0	None	Absent	0	None
FeFe hydrogenase	fefe-group-a4	FeFe hydrogenase, H2-uptake/Electron-bifurcation	Absent	0	None	Absent	0	None	Absent	0	None	Absent	0	None
FeFe hydrogenase	fefe-group-b	FeFe hydrogenase, H2-evolution	Absent	0	None	Absent	0	None	Absent	0	None	Absent	0	None
FeFe hydrogenase	fefe-group-c1	FeFe hydrogenase, H2-sensing	Absent	0	None	Absent	0	None	Absent	0	None	Absent	0	None
FeFe hydrogenase	fefe-group-c2	FeFe hydrogenase, H2-sensing	Absent	0	None	Absent	0	None	Absent	0	None	Absent	0	None
FeFe hydrogenase	fefe-group-c3	FeFe hydrogenase, H2-sensing	Absent	0	None	Absent	0	None	Absent	0	None	Absent	0	None
Fe hydrogenase	fe	Fe hydrogenase, Bidirectional	Absent	0	None	Absent	0	None	Absent	0	None	Absent	0	None
Ni-Fe Hydrogenase	nife-group-1	Ni-Fe Hydrogenase, H2-uptake	Absent	0	None	Absent	0	None	Absent	0	None	Absent	0	None
Ni-Fe Hydrogenase	nife-group-2ade	Ni-Fe Hydrogenase, H2-uptake	Absent	0	None	Absent	0	None	Absent	0	None	Absent	0	None
Ni-Fe Hydrogenase	nife-group-2bc	Ni-Fe Hydrogenase, H2-uptake	Absent	0	None	Absent	0	None	Absent	0	None	Absent	0	None
Ni-Fe Hydrogenase	nife-group-3abd	Ni-Fe Hydrogenase, Bidirectional	Absent	0	None	Absent	0	None	Absent	0	None	Absent	0	None
Ni-Fe Hydrogenase	nife-group-3c	Ni-Fe Hydrogenase, Electron-bifurcation	Absent	0	None	Absent	0	None	Absent	0	None	Absent	0	None
Ni-Fe Hydrogenase	nife-group-4a-g	Ni-Fe Hydrogenase, H2-evolving	Absent	0	None	Absent	0	None	Absent	0	None	Absent	0	None
Ni-Fe Hydrogenase	nife-group-4hi	Ni-Fe Hydrogenase, H2-uptake	Absent	0	None	Absent	0	None	Absent	0	None	Absent	0	None
Complex I (NADH-quinone oxidoreductase)	nuoA	NADH-quinone oxidoreductase subunit A	Present	1	CER94_00066	Present	1	CER28_00007	Present	1	CER48_02585	Absent	0	None
Complex I (NADH-quinone oxidoreductase)	nuoB	NADH-quinone oxidoreductase subunit B	Present	1	CER94_00067	Present	1	CER28_00008	Present	1	CER48_02586	Present	1	CER55_01025
Complex I (NADH-quinone oxidoreductase)	nuoC	NADH-quinone oxidoreductase subunit C	Present	1	CER94_00068	Present	1	CER28_00009	Present	1	CER48_02587	Absent	0	None
Complex I (NAD(P)H-quinone oxidoreductase)	NdhA	NAD(P)H-quinone oxidoreductase subunit 1	Absent	0	None	Absent	0	None	Absent	0	None	Absent	0	None
Complex I (NAD(P)H-quinone oxidoreductase)	NdhB	NAD(P)H-quinone oxidoreductase subunit 2	Absent	0	None	Absent	0	None	Absent	0	None	Absent	0	None
Complex I (NAD(P)H-quinone oxidoreductase)	NdhC	NAD(P)H-quinone oxidoreductase subunit 3	Absent	0	None	Absent	0	None	Absent	0	None	Absent	0	None
Complex II (Succinate dehydrogenase/Fumarate reductase)	sdhC	succinate dehydrogenase / fumarate reductase, cytochrome b subunit	Absent	0	None	Present	1	CER28_00826	Present	1	CER48_00549	Present	1	CER55_00295
Complex II (Succinate dehydrogenase/Fumarate reductase)	sdhD	succinate dehydrogenase / fumarate reductase, membrane anchor subunit	Present	1	CER94_00299	Absent	0	None	Present	1	CER48_00548	Present	1	CER55_00296
Complex III (Cytochrome c reductase)	petA	ubiquinol-cytochrome c reductase iron-sulfur subunit	Present	1	CER94_01957	Absent	0	None	Present	1	CER48_01225	Absent	0	None
Complex III (Cytochrome c reductase)	petB	ubiquinol-cytochrome c reductase cytochrome b/c1 subunit	Present	1	CER94_01956	Absent	0	None	Present	1	CER48_01226	Absent	0	None
Complex III (Cytochrome c reductase)	fbcH	ubiquinol-cytochrome c reductase cytochrome b/c1 subunit	Absent	0	None	Absent	0	None	Present	1	CER48_01226	Absent	0	None
Complex V (ATP synthase: V/A-type H+/Na+-transporting ATPase)	atpA (V/A-type)	V/A-type H+/Na+-transporting ATPase subunit A	Absent	0	None	Absent	0	None	Absent	0	None	Absent	0	None
Complex V (ATP synthase: V/A-type H+/Na+-transporting ATPase)	atpB (V/A-type)	V/A-type H+/Na+-transporting ATPase subunit B	Absent	0	None	Absent	0	None	Absent	0	None	Absent	0	None
Complex V (F-type H+-transporting ATPase)	atpA (F-type)	F-type H+/Na+-transporting ATPase subunit alpha	Present	1	CER94_01283	Present	1	CER28_00027	Present	1	CER48_00925	Present	1	CER55_00878
Complex V (F-type H+-transporting ATPase)	atpD (F-type)	F-type H+/Na+-transporting ATPase subunit beta	Present	1	CER94_01285	Present	1	CER28_00025	Present	2	CER48_00923,CER48_03143	Absent	0	None
Oxygen metabolism - cytochrome c oxidase, caa3-type	coxA	cytochrome c oxidase subunit I	Present	2	CER94_00507,CER94_01917	Present	1	CER28_01690	Present	1	CER48_00557	Absent	0	None
Oxygen metabolism - cytochrome c oxidase, caa3-type	coxB	cytochrome c oxidase subunit II	Present	1	CER94_00506	Present	1	CER28_01691	Present	1	CER48_00558	Absent	0	None
Oxygen metabolism - cytochrome c oxidase, cbb3-type	ccoN	cytochrome c oxidase cbb3-type subunit I	Present	1	CER94_03220	Absent	0	None	Present	1	CER48_00114	Absent	0	None
Oxygen metabolism - cytochrome c oxidase, cbb3-type	ccoO	cytochrome c oxidase cbb3-type subunit II	Absent	0	None	Absent	0	None	Present	1	CER48_00113	Absent	0	None
Oxygen metabolism - cytochrome c oxidase, cbb3-type	ccoP	cytochrome c oxidase cbb3-type subunit III	Present	1	CER94_03525	Absent	0	None	Present	1	CER48_00111	Absent	0	None
Oxygen metabolism - cytochrome (quinone) oxidase, bo type	cyoA	cytochrome o ubiquinol oxidase subunit II	Present	3	CER94_00087,CER94_02259,CER94_00565	Absent	0	None	Present	1	CER48_00957	Present	1	CER55_01503
Oxygen metabolism - cytochrome (quinone) oxidase, bo type	cyoD	cytochrome o ubiquinol oxidase subunit IV	Present	3	CER94_00090,CER94_00568,CER94_02262	Absent	0	None	Present	1	CER48_00954	Present	1	CER55_01318
Oxygen metabolism - cytochrome (quinone) oxidase, bo type	cyoB	cytochrome o ubiquinol oxidase subunit I	Present	3	CER94_00566,CER94_00088,CER94_02260	Absent	0	None	Present	1	CER48_00956	Absent	0	None
Oxygen metabolism - cytochrome (quinone) oxidase, bo type	cyoC	cytochrome o ubiquinol oxidase subunit III	Present	3	CER94_00089,CER94_00567,CER94_02261	Absent	0	None	Present	1	CER48_00955	Absent	0	None
Oxygen metabolism - cytochrome (quinone) oxidase, bd type	cydA	cytochrome bd ubiquinol oxidase subunit I	Present	1	CER94_01141	Absent	0	None	Present	1	CER48_01648	Present	1	CER55_01702
Oxygen metabolism - cytochrome (quinone) oxidase, bd type	cydB	cytochrome bd ubiquinol oxidase subunit II	Present	1	CER94_01142	Absent	0	None	Present	1	CER48_01647	Absent	0	None
Oxygen metabolism - cytochrome (quinone) oxidase, aa3 type, QoxABCD	qoxA	cytochrome aa3-600 menaquinol oxidase subunit II	Absent	0	None	Absent	0	None	Absent	0	None	Absent	0	None
Oxygen metabolism - cytochrome (quinone) oxidase, aa3 type, QoxABCD	qoxB	cytochrome aa3-600 menaquinol oxidase subunit I	Absent	0	None	Absent	0	None	Absent	0	None	Absent	0	None
Urease	ureC	urease subunit alpha	Present	1	CER94_00100	Absent	0	None	Present	1	CER48_02181	Present	1	CER55_00128
Urease	ureB	urease subunit beta	Present	1	CER94_00099	Absent	0	None	Present	1	CER48_02182	Present	1	CER55_00129
Urease	ureA	urease subunit gamma	Present	1	CER94_00097	Absent	0	None	Present	1	CER48_02184	Present	1	CER55_00130
Halogenated compounds breakdown	E3.8.1.2	2-haloacid dehalogenase	Present	1	CER94_02235	Absent	0	None	Present	1	CER48_01683	Absent	0	None
Halogenated compounds breakdown	pcpC	tetrachlorohydroquinone reductive dehalogenase	Absent	0	None	Absent	0	None	Absent	0	None	Absent	0	None
Halogenated compounds breakdown	cprA	3-chloro-4-hydroxyphenylacetate reductive dehalogenase	Absent	0	None	Absent	0	None	Absent	0	None	Absent	0	None
Halogenated compounds breakdown	pceA	tetrachloroethene reductive dehalogenase	Absent	0	None	Absent	0	None	Absent	0	None	Absent	0	None
Perchlorate reduction	pcrA	perchlorate reductase, subunit alpha	Absent	0	None	Present	1	CER28_00455	Absent	0	None	Absent	0	None
Perchlorate reduction	pcrB	perchlorate reductase, subunit beta	Absent	0	None	Absent	0	None	Absent	0	None	Absent	0	None
Chlorite reduction	cld	chlorite dismutase	Absent	0	None	Present	1	CER28_00984	Absent	0	None	Absent	0	None
Dissimilatory arsenate reduction	arrA	dissimilatory arsenate reductase	Absent	0	None	Absent	0	None	Absent	0	None	Absent	0	None
Arsenate reduction for detoxification	arsC (grx)	arsenate reductase (glutaredoxin)	Absent	0	None	Absent	0	None	Absent	0	None	Absent	0	None
Arsenate reduction for detoxification	arsC (trx)	arsenate reductase (thioredoxin)	Absent	0	None	Absent	0	None	Absent	0	None	Absent	0	None
Arsenite oxidation for energy metabolism	arxA	arsenite oxidase (molybdopterin subunit)	Absent	0	None	Absent	0	None	Absent	0	None	Absent	0	None
Arsenite oxidation for detoxification and energy metabolism	aioA	arsenite oxidase large subunit	Absent	0	None	Absent	0	None	Absent	0	None	Absent	0	None
Arsenite methylation	arsM	arsenite methyltransferase	Absent	0	None	Absent	0	None	Absent	0	None	Absent	0	None
Selenate reduction	ygfM	putative selenate reductase FAD-binding subunit	Absent	0	None	Absent	0	None	Absent	0	None	Absent	0	None
Selenate reduction	xdhD	putative selenate reductase molybdopterin-binding subunit	Absent	0	None	Absent	0	None	Absent	0	None	Absent	0	None
Selenate reduction	YgfK	putative selenate reductase	Absent	0	None	Absent	0	None	Absent	0	None	Absent	0	None
Nitrile hydratase	nthA	nitrile hydratase subunit alpha	Absent	0	None	Absent	0	None	Present	1	CER48_00535	Absent	0	None
Nitrile hydratase	nthB	nitrile hydratase subunit beta	Absent	0	None	Absent	0	None	Present	1	CER48_00534	Absent	0	None
Iron oxidation	Cyc1	Cyc1	Present	1	CER94_02173	Absent	0	None	Absent	0	None	Absent	0	None
Iron oxidation	Cyc2_repCluster1	Cyc2_repCluster1	Absent	0	None	Absent	0	None	Absent	0	None	Absent	0	None
Iron oxidation	Cyc2_repCluster2	Cyc2_repCluster2	Absent	0	None	Absent	0	None	Absent	0	None	Absent	0	None
Iron oxidation	Cyc2_repCluster3	Cyc2_repCluster3	Absent	0	None	Absent	0	None	Absent	0	None	Absent	0	None
Iron oxidation	FoxA	FoxA	Absent	0	None	Absent	0	None	Absent	0	None	Absent	0	None
Iron oxidation	FoxB	FoxB	Absent	0	None	Absent	0	None	Absent	0	None	Absent	0	None
Iron oxidation	FoxC	FoxC	Absent	0	None	Absent	0	None	Absent	0	None	Absent	0	None
Iron oxidation	FoxE	FoxE	Absent	0	None	Absent	0	None	Absent	0	None	Absent	0	None
Iron oxidation	FoxY	FoxY	Absent	0	None	Absent	0	None	Absent	0	None	Absent	0	None
Iron oxidation	FoxZ	FoxZ	Absent	0	None	Absent	0	None	Present	1	CER48_01363	Absent	0	None
Iron oxidation	MtoA	MtoA	Absent	0	None	Absent	0	None	Absent	0	None	Absent	0	None
Iron oxidation	sulfocyanin	sulfocyanin	Absent	0	None	Absent	0	None	Absent	0	None	Absent	0	None
Metal (Iron/Manganese) reduction	MtrA	MtrA	Absent	0	None	Absent	0	None	Absent	0	None	Absent	0	None
Metal (Iron/Manganese) reduction	MtrB_TIGR03509	MtrB_TIGR03509	Absent	0	None	Absent	0	None	Absent	0	None	Absent	0	None
Metal (Iron/Manganese) reduction	MtrC_TIGR03507	MtrC_TIGR03507	Absent	0	None	Absent	0	None	Absent	0	None	Absent	0	None
Iron reduction	CymA	CymA	Absent	0	None	Absent	0	None	Present	1	CER48_02046	Absent	0	None
Iron reduction	OmcF	OmcF	Absent	0	None	Absent	0	None	Absent	0	None	Absent	0	None
Iron reduction	OmcS	OmcS	Absent	0	None	Absent	0	None	Absent	0	None	Absent	0	None
Iron reduction	OmcZ	OmcZ	Absent	0	None	Absent	0	None	Absent	0	None	Absent	0	None
Iron reduction	FmnA	FmnA	Absent	0	None	Absent	0	None	Absent	0	None	Absent	0	None
Iron reduction	DmkA	DmkA	Absent	0	None	Present	1	CER28_00050	Absent	0	None	Absent	0	None
Iron reduction	FmnB	FmnB	Present	1	CER94_00620	Absent	0	None	Absent	0	None	Present	1	CER55_01694
Iron reduction	PplA	PplA	Absent	0	None	Absent	0	None	Absent	0	None	Absent	0	None
Iron reduction	Ndh2	Ndh2	Present	1	CER94_00050	Present	2	CER28_01280,CER28_01847	Absent	0	None	Absent	0	None
Iron reduction	EetA	EetA	Absent	0	None	Absent	0	None	Absent	0	None	Absent	0	None
Iron reduction	EetB	EetB	Absent	0	None	Absent	0	None	Absent	0	None	Absent	0	None
Iron reduction	DmkB	DmkB	Present	2	CER94_00614,CER94_00057	Present	2	CER28_00021,CER28_01631	Present	2	CER48_02862,CER48_01213	Absent	0	None
Iron reduction	DFE_0448	DFE_0448	Absent	0	None	Absent	0	None	Absent	0	None	Absent	0	None
Iron reduction	DFE_0449	DFE_0449	Absent	0	None	Absent	0	None	Absent	0	None	Absent	0	None
Iron reduction	DFE_0450	DFE_0450	Absent	0	None	Absent	0	None	Absent	0	None	Absent	0	None
Iron reduction	DFE_0451	DFE_0451	Absent	0	None	Absent	0	None	Absent	0	None	Absent	0	None
Iron reduction	DFE_0461	DFE_0461	Absent	0	None	Absent	0	None	Absent	0	None	Absent	0	None
Iron reduction	DFE_0462	DFE_0462	Absent	0	None	Absent	0	None	Absent	0	None	Absent	0	None
Iron reduction	DFE_0463	DFE_0463	Absent	0	None	Absent	0	None	Absent	0	None	Absent	0	None
Iron reduction	DFE_0464	DFE_0464	Absent	0	None	Absent	0	None	Absent	0	None	Absent	0	None
Iron reduction	DFE_0465	DFE_0465	Absent	0	None	Absent	0	None	Absent	0	None	Absent	0	None
Manganese oxidation	Manganese_oxidase_K06324	Manganese_oxidase_K06324	Absent	0	None	Absent	0	None	Absent	0	None	Absent	0	None
Manganese oxidation	Manganese_oxidase_K22348	Manganese_oxidase_K22348	Present	1	CER94_03061	Absent	0	None	Absent	0	None	Absent	0	None
Manganese oxidation	Manganese_oxidase_K22349	Manganese_oxidase_K22349	Absent	0	None	Absent	0	None	Absent	0	None	Absent	0	None
Manganese oxidation	Manganese_oxidase_K22350	Manganese_oxidase_K22350	Absent	0	None	Absent	0	None	Absent	0	None	Absent	0	None
Dissimilatory sulfur metabolism | Sulfide oxidation	fccB	flavocytochrome c sulphide dehydrogenase, flavin-binding	Absent	0	None	Absent	0	None	Absent	0	None	Absent	0	None
Dissimilatory sulfur metabolism | Sulfide oxidation	sqr	sulfide:quinone oxidoreductase	Absent	0	None	Absent	0	None	Absent	0	None	Absent	0	None
Dissimilatory sulfur metabolism | Sulfur oxidation/Sulfite reduction	dsrA	dissimilatory sulfite reductase alpha subunit	Absent	0	None	Absent	0	None	Absent	0	None	Absent	0	None
Dissimilatory sulfur metabolism | Sulfur oxidation/Sulfite reduction	dsrB	dissimilatory sulfite reductase beta subunit	Absent	0	None	Absent	0	None	Absent	0	None	Absent	0	None
Dissimilatory sulfur metabolism | Sulfur oxidation/Sulfite reduction	dsrC	dissimilatory sulfite reductase, subunit C	Absent	0	None	Absent	0	None	Absent	0	None	Absent	0	None
Dissimilatory sulfur metabolism | Sulfur oxidation/Sulfite reduction	dsrD	dissimilatory sulfite reductase delta subunit	Absent	0	None	Absent	0	None	Absent	0	None	Absent	0	None
Dissimilatory sulfur metabolism | Sulfur oxidation/Sulfite reduction	dsrE	dissimilatory sulfite reductase, subunit E	Absent	0	None	Absent	0	None	Absent	0	None	Absent	0	None
Dissimilatory sulfur metabolism | Sulfur oxidation/Sulfite reduction	dsrF	dissimilatory sulfite reductase, subunit F	Absent	0	None	Absent	0	None	Absent	0	None	Absent	0	None
Dissimilatory sulfur metabolism | Sulfur oxidation/Sulfite reduction	dsrH	dissimilatory sulfite reductase, subunit H	Absent	0	None	Absent	0	None	Absent	0	None	Absent	0	None
Dissimilatory sulfur metabolism | Sulfur oxidation/Sulfite reduction	dsrJ	dissimilatory sulfite reductase, subunit J	Absent	0	None	Absent	0	None	Absent	0	None	Absent	0	None
Dissimilatory sulfur metabolism | Sulfur oxidation/Sulfite reduction	dsrK	dissimilatory sulfite reductase, subunit K	Absent	0	None	Absent	0	None	Absent	0	None	Absent	0	None
Dissimilatory sulfur metabolism | Sulfur oxidation/Sulfite reduction	dsrM	dissimilatory sulfite reductase, subunit M	Absent	0	None	Absent	0	None	Absent	0	None	Absent	0	None
Dissimilatory sulfur metabolism | Sulfur oxidation/Sulfite reduction	dsrO	dissimilatory sulfite reductase, subunit O	Absent	0	None	Absent	0	None	Absent	0	None	Absent	0	None
Dissimilatory sulfur metabolism | Sulfur oxidation/Sulfite reduction	dsrP	dissimilatory sulfite reductase, subunit P	Absent	0	None	Absent	0	None	Absent	0	None	Absent	0	None
Dissimilatory sulfur metabolism | Sulfur oxidation/Sulfite reduction	dsrR	dissimilatory sulfite reductase, subunit R	Absent	0	None	Absent	0	None	Absent	0	None	Absent	0	None
Dissimilatory sulfur metabolism | Sulfur oxidation/Sulfite reduction	dsrS	dissimilatory sulfite reductase, subunit S	Absent	0	None	Absent	0	None	Absent	0	None	Absent	0	None
Dissimilatory sulfur metabolism | Sulfur oxidation/Sulfite reduction	dsrT	dissimilatory sulfite reductase, subunit T	Absent	0	None	Absent	0	None	Absent	0	None	Absent	0	None
Dissimilatory sulfur metabolism | Sulfite reduction	asrA	anaerobic sulfite reductase subunit A	Absent	0	None	Absent	0	None	Absent	0	None	Absent	0	None
Dissimilatory sulfur metabolism | Sulfite reduction	asrB	anaerobic sulfite reductase subunit B	Absent	0	None	Absent	0	None	Absent	0	None	Absent	0	None
Dissimilatory sulfur metabolism | Sulfite reduction	asrC	anaerobic sulfite reductase subunit C	Absent	0	None	Absent	0	None	Absent	0	None	Absent	0	None
Dissimilatory sulfur metabolism | Sulfur oxidation	sdo	sulfur dioxygenase	Absent	0	None	Absent	0	None	Absent	0	None	Absent	0	None
Dissimilatory sulfur metabolism | Sulfur oxidation/reduction	sor	sulfur oxygenase/reductase	Absent	0	None	Absent	0	None	Absent	0	None	Absent	0	None
Dissimilatory sulfur metabolism | Sulfur reduction	sreA	sulfur reductase molybdopterin subunit	Absent	0	None	Absent	0	None	Absent	0	None	Absent	0	None
Dissimilatory sulfur metabolism | Sulfur reduction	sreB	sulfur reductase FeS subunit	Absent	0	None	Absent	0	None	Absent	0	None	Absent	0	None
Dissimilatory sulfur metabolism | Sulfur reduction	sreC	sulfur reductase membrane anchor	Absent	0	None	Absent	0	None	Absent	0	None	Absent	0	None
Dissimilatory sulfur metabolism | Thiosulfate oxidation	soxA	L-cysteine S-thiosulfotransferase	Present	1	CER94_01935	Absent	0	None	Absent	0	None	Absent	0	None
Dissimilatory sulfur metabolism | Thiosulfate oxidation	soxB	S-sulfosulfanyl-L-cysteine sulfohydrolase	Present	1	CER94_01932	Absent	0	None	Absent	0	None	Absent	0	None
Dissimilatory sulfur metabolism | Thiosulfate oxidation	soxC	sulfane dehydrogenase subunit SoxC	Absent	0	None	Absent	0	None	Absent	0	None	Absent	0	None
Dissimilatory sulfur metabolism | Thiosulfate oxidation	soxD	S-disulfanyl-L-cysteine oxidoreductase SoxD	Absent	0	None	Absent	0	None	Absent	0	None	Absent	0	None
Dissimilatory sulfur metabolism | Thiosulfate oxidation	soxX	L-cysteine S-thiosulfotransferase	Present	1	CER94_01934	Absent	0	None	Absent	0	None	Absent	0	None
Dissimilatory sulfur metabolism | Thiosulfate oxidation	soxY	sulfur-oxidizing protein SoxY	Present	1	CER94_01938	Absent	0	None	Absent	0	None	Absent	0	None
Dissimilatory sulfur metabolism | Thiosulfate oxidation	soxYZ	soxYZ_like_carrier	Absent	0	None	Absent	0	None	Absent	0	None	Absent	0	None
Dissimilatory sulfur metabolism | Thiosulfate oxidation	soxZ	sulfur-oxidizing protein SoxZ	Present	1	CER94_01937	Absent	0	None	Absent	0	None	Absent	0	None
Dissimilatory sulfur metabolism | Sulfate reduction	aprA	adenylylsulfate reductase, subunit A	Absent	0	None	Absent	0	None	Absent	0	None	Absent	0	None
Dissimilatory sulfur metabolism | Sulfate reduction	aprB	adenylylsulfate reductase, subunit B	Absent	0	None	Absent	0	None	Absent	0	None	Absent	0	None
Dissimilatory sulfur metabolism | Sulfate reduction	sat	sulfate adenylyltransferase	Absent	0	None	Absent	0	None	Absent	0	None	Absent	0	None
Dissimilatory sulfur metabolism | Thiosulfate disproportionation	phsA	thiosulfate reductase / polysulfide reductase chain A	Absent	0	None	Absent	0	None	Absent	0	None	Absent	0	None
Assimilatory sulfur metabolism| Sulfate <-> APS (Adenosine 5'-phosphosulfate)	cysD	sulfate adenylyltransferase subunit 2	Present	1	CER94_01071	Present	1	CER28_01928	Present	1	CER48_02377	Present	1	CER55_00824
Assimilatory sulfur metabolism| Sulfate <-> APS (Adenosine 5'-phosphosulfate)	cysN	sulfate adenylyltransferase subunit 1	Present	1	CER94_01072	Present	1	CER28_01927	Present	1	CER48_02376	Absent	0	None
Assimilatory sulfur metabolism| Sulfate <-> APS (Adenosine 5'-phosphosulfate)	cysNC	bifunctional enzyme CysN/CysC	Absent	0	None	Absent	0	None	Absent	0	None	Absent	0	None
Assimilatory sulfur metabolism| APS (Adenosine 5'-phosphosulfate) <-> PAPS (3'-Phosphoadenosine 5'-phosphosulfate)	cysC	adenylylsulfate kinase	Absent	0	None	Absent	0	None	Absent	0	None	Present	2	CER55_02266,CER55_02056
Assimilatory sulfur metabolism| APS (Adenosine 5'-phosphosulfate) <-> PAPS (3'-Phosphoadenosine 5'-phosphosulfate)	cysNC	bifunctional enzyme CysN/CysC	Absent	0	None	Absent	0	None	Absent	0	None	Absent	0	None
Assimilatory sulfur metabolism| PAPS (3'-Phosphoadenosine 5'-phosphosulfate) <-> Sulfite	cysH	phosphoadenosine phosphosulfate reductase	Present	1	CER94_01070	Present	1	CER28_00393	Present	1	CER48_02378	Present	2	CER55_00754,CER55_02498
Assimilatory sulfur metabolism| Sulfite -> Sulfide	cysJ	sulfite reductase (NADPH) flavoprotein alpha-component	Absent	0	None	Absent	0	None	Absent	0	None	Absent	0	None
Assimilatory sulfur metabolism| Sulfide -> Cysteine	cysK	cysteine synthase	Absent	0	None	Absent	0	None	Present	2	CER48_01545,CER48_01822	Absent	0	None
Assimilatory sulfur metabolism| Sulfide -> Cysteine	cysM	S-sulfo-L-cysteine synthase (O-acetyl-L-serine-dependent)	Present	1	CER94_01181	Absent	0	None	Absent	0	None	Present	1	CER55_00185
DMSO metabolism | DMSO (Dimethyl sulfoxide) -> Methanesulfonate	dsoA	DMS oxygenase alpha subunit	Absent	0	None	Absent	0	None	Absent	0	None	Absent	0	None
DMSO metabolism | DMSO (Dimethyl sulfoxide) -> Methanesulfonate	dsoB	DMS oxygenase beta subunit	Absent	0	None	Absent	0	None	Absent	0	None	Absent	0	None
DMSO metabolism | DMSO (Dimethyl sulfoxide) -> Methanesulfonate	sfnG	dimethylsulfone monooxygenase	Absent	0	None	Absent	0	None	Absent	0	None	Absent	0	None
DMSO metabolism | DMSO (Dimethyl sulfoxide) -> Methanesulfonate	msuD	methanesulfonate monooxygenase	Present	2	CER94_02338,CER94_01739	Absent	0	None	Absent	0	None	Absent	0	None
DMSO metabolism | DMSO (Dimethyl sulfoxide) <-> DMS (Dimethyl sulfide)	dsoA	DMS oxygenase alpha subunit	Absent	0	None	Absent	0	None	Absent	0	None	Absent	0	None
DMSO metabolism | DMSO (Dimethyl sulfoxide) <-> DMS (Dimethyl sulfide)	dsoB	DMS oxygenase beta subunit	Absent	0	None	Absent	0	None	Absent	0	None	Absent	0	None
DMSO metabolism | DMSO (Dimethyl sulfoxide) <-> DMS (Dimethyl sulfide)	ddhA	dimethylsulfide dehydrogenase subunit alpha	Absent	0	None	Absent	0	None	Absent	0	None	Absent	0	None
DMSO metabolism | DMSO (Dimethyl sulfoxide) <-> DMS (Dimethyl sulfide)	dmsA	anaerobic dimethyl sulfoxide reductase subunit A	Absent	0	None	Absent	0	None	Absent	0	None	Absent	0	None
DMSO metabolism | DMS (Dimethyl sulfide) <-> Methanethiol	dmoA	dimethyl-sulfide monooxygenase subunit A	Absent	0	None	Absent	0	None	Absent	0	None	Absent	0	None
DMSO metabolism | DMS (Dimethyl sulfide) <-> Methanethiol	dmoB	dimethyl-sulfide monooxygenase subunit B	Present	4	CER94_01354,CER94_00887,CER94_03486,CER94_00261	Present	3	CER28_02215,CER28_00453,CER28_00433	Present	4	CER48_01439,CER48_02597,CER48_00596,CER48_02159	Absent	0	None
DMSO metabolism | DMS (Dimethyl sulfide) <-> Methanethiol	mddA	methanethiol S-methyltransferase	Absent	0	None	Present	1	CER28_01187	Absent	0	None	Absent	0	None
Sulfite production from organic sulfur | Taurine -> Sulfite	tauD	taurine dioxygenase	Absent	0	None	Absent	0	None	Absent	0	None	Present	1	CER55_01030
Sulfite production from organic sulfur | Alkylsulfonate/Isethionate -> Sulfite	ssuD	alkanesulfonate monooxygenase	Present	2	CER94_02338,CER94_01739	Absent	0	None	Absent	0	None	Absent	0	None
Sulfite production from organic sulfur | Methanesulfonate -> Sulfite	msmA	methanesulfonate monooxygenase	Absent	0	None	Absent	0	None	Absent	0	None	Absent	0	None
Metabolism of organic sulfur | Cysteine <-> Cystathionine	metB	cystathionine gamma-synthase	Absent	0	None	Present	1	CER28_02079	Absent	0	None	Absent	0	None
Metabolism of organic sulfur | Cysteine <-> 3-mercaptopyruvate	aspB	aspartate aminotransferase	Present	1	CER94_01787	Present	1	CER28_01980	Present	1	CER48_01046	Absent	0	None
Metabolism of organic sulfur | OAHS (O-acetylhomoserine) + Sulfide -> Homocysteine	metY	O-acetylhomoserine (thiol)-lyase	Present	1	CER94_02252	Absent	0	None	Present	1	CER48_03070	Absent	0	None
Metabolism of organic sulfur | Cystathionine -> Homocysteine	malY	cysteine-S-conjugate beta-lyase	Absent	0	None	Absent	0	None	Present	1	CER48_03137	Absent	0	None
Metabolism of organic sulfur | Cystathionine -> Homocysteine	metC	cysteine-S-conjugate beta-lyase	Present	3	CER94_02045,CER94_01783,CER94_01083	Present	1	CER28_02079	Absent	0	None	Absent	0	None
Metabolism of organic sulfur | MHO (L-methionine (R)-S-oxide) -> Methionine)	msrC	L-methionine (R)-S-oxide reductase	Absent	0	None	Absent	0	None	Absent	0	None	Present	1	CER55_01232
Metabolism of organic sulfur | Homocysteine -> Methionine	metH	5-methyltetrahydrofolate--homocysteine methyltransferase	Present	2	CER94_02002,CER94_02003	Present	1	CER28_00081	Absent	0	None	Present	2	CER55_01134,CER55_01603
Metabolism of organic sulfur | Homocysteine <-> Methionine	metE	5-methyltetrahydropteroyltriglutamate--homocysteine methyltransferase	Absent	0	None	Present	2	CER28_02356,CER28_02045	Absent	0	None	Present	1	CER55_01913
Metabolism of organic sulfur | SAH (S-adenosyl-L-homocysteine) -> Homocysteine	ahcY	adenosylhomocysteinase	Present	1	CER94_01397	Present	1	CER28_00202	Present	1	CER48_02571	Absent	0	None
Metabolism of organic sulfur | SRH (S-ribosylhomocysteine) -> Homocysteine	luxS	S-ribosylhomocysteine lyase	Absent	0	None	Absent	0	None	Absent	0	None	Present	1	CER55_02183
Metabolism of organic sulfur | SAH (S-adenosyl-L-homocysteine) -> SRH (S-ribosylhomocysteine)	mtnN	adenosylhomocysteine nucleosidase	Present	1	CER94_01393	Absent	0	None	Absent	0	None	Present	1	CER55_01816
Sulfur-related amino acid metabolism | Cysteine -> Sulfide	cysK	cysteine synthase	Absent	0	None	Absent	0	None	Present	2	CER48_01545,CER48_01822	Absent	0	None
Sulfur-related amino acid metabolism | Cysteine -> Sulfide	cysM	S-sulfo-L-cysteine synthase (O-acetyl-L-serine-dependent)	Present	1	CER94_01181	Absent	0	None	Absent	0	None	Present	1	CER55_00185
Sulfur-related amino acid metabolism | Cysteine -> Sulfide	malY	cysteine-S-conjugate beta-lyase	Absent	0	None	Absent	0	None	Present	1	CER48_03137	Absent	0	None
Sulfur-related amino acid metabolism | Cysteine -> Sulfide	dcyD	D-cysteine desulfhydrase	Absent	0	None	Absent	0	None	Absent	0	None	Absent	0	None
Sulfur-related amino acid metabolism | Cysteine -> Sulfide	metC	cysteine-S-conjugate beta-lyase	Present	3	CER94_02045,CER94_01783,CER94_01083	Present	1	CER28_02079	Absent	0	None	Absent	0	None
Sulfur-related amino acid metabolism | Methionine -> Methanethiol	megL	methionine gamma-lyase	Absent	0	None	Present	1	CER28_02079	Present	1	CER48_03070	Absent	0	None
Sulfur-related amino acid metabolism | Methionine -> SAMe (S-adenosyl-L-methionine)	metK	S-adenosylmethionine synthetase	Present	1	CER94_00358	Present	1	CER28_01375	Present	1	CER48_00057	Present	1	CER55_00121
Sulfur-related amino acid metabolism | SAMe (S-adenosyl-L-methionine) -> SAH (S-adenosyl-L-homocysteine)	dcm	DNA (cytosine-5)-methyltransferase 1	Absent	0	None	Absent	0	None	Absent	0	None	Absent	0	None

## Sheet: Table S4
Table S4. Distribution of Transporter Genes in Four Cerrado strains, Grouped by Functional Modules
gene_id	gene_description	module	CER48	CER55	CER28	CER94
K02035	ABC.PE.S; peptide/nickel transport system substrate-binding protein	Peptides/nickel transport system	21	0	0	3
K02033	ABC.PE.P; peptide/nickel transport system permease protein	Peptides/nickel transport system	17	2	1	2
K02034	ABC.PE.P1; peptide/nickel transport system permease protein	Peptides/nickel transport system	17	1	0	2
K02029	ABC.PA.P; polar amino acid transport system permease protein	Putative polar amino acid transport system	9	1	0	1
K02029	ABC.PA.P; polar amino acid transport system permease protein	Putative polar amino acid transport system	9	1	0	1
K02030	ABC.PA.S; polar amino acid transport system substrate-binding protein	Putative polar amino acid transport system	9	0	0	3
K02030	ABC.PA.S; polar amino acid transport system substrate-binding protein	Putative polar amino acid transport system	9	0	0	3
K01995	livG; branched-chain amino acid transport system ATP-binding protein	Branched-chain amino acid transport system	8	1	1	9
K01995	livG; branched-chain amino acid transport system ATP-binding protein	Branched-chain amino acid transport system	8	1	1	9
K01997	livH; branched-chain amino acid transport system permease protein	Branched-chain amino acid transport system	8	1	1	10
K01997	livH; branched-chain amino acid transport system permease protein	Branched-chain amino acid transport system	8	1	1	10
K01999	livK; branched-chain amino acid transport system substrate-binding protein	Branched-chain amino acid transport system	8	0	0	15
K01999	livK; branched-chain amino acid transport system substrate-binding protein	Branched-chain amino acid transport system	8	0	0	15
K01996	livF; branched-chain amino acid transport system ATP-binding protein	Branched-chain amino acid transport system	7	1	1	9
K01996	livF; branched-chain amino acid transport system ATP-binding protein	Branched-chain amino acid transport system	7	1	1	9
K01998	livM; branched-chain amino acid transport system permease protein	Branched-chain amino acid transport system	7	1	1	6
K01998	livM; branched-chain amino acid transport system permease protein	Branched-chain amino acid transport system	7	1	1	6
K02031	ABC.PE.A; peptide/nickel transport system ATP-binding protein	Peptides/nickel transport system	7	0	2	3
K02011	ABC.FE.P; iron(III) transport system permease protein	Iron(III) transport system	6	0	0	0
K02012	ABC.FE.S; iron(III) transport system substrate-binding protein	Iron(III) transport system	6	0	0	1
K02028	ABC.PA.A; polar amino acid transport system ATP-binding protein [EC:7.4.2.1]	Putative polar amino acid transport system	6	1	0	2
K02028	ABC.PA.A; polar amino acid transport system ATP-binding protein [EC:7.4.2.1]	Putative polar amino acid transport system	6	1	0	2
K02025	ABC.MS.P; multiple sugar transport system permease protein	Putative multiple sugar transport system	5	0	0	0
K09969	aapJ; general L-amino acid transport system substrate-binding protein	General L-amino acid transport system	4	0	0	0
K09969	aapJ; general L-amino acid transport system substrate-binding protein	General L-amino acid transport system	4	0	0	0
K10112	msmX; multiple sugar transport system ATP-binding protein	alpha-Glucoside transport system	3	0	2	2
K10112	msmX; multiple sugar transport system ATP-binding protein	Arabinosaccharide transport system	3	0	2	2
K10112	msmX; multiple sugar transport system ATP-binding protein	Cellobiose transport system	3	0	2	2
K10112	msmX; multiple sugar transport system ATP-binding protein	Glucose/mannose transport system	3	0	2	2
K10112	msmX; maltose/maltodextrin transport system ATP-binding protein	Maltose/maltodextrin transport system	3	0	2	2
K10112	msmX; multiple sugar transport system ATP-binding protein	N,N'-Diacetylchitobiose transport system	3	0	2	2
K02049	ABC.SN.A; sulfonate/nitrate/taurine transport system ATP-binding protein	NitT/TauT family transport system	3	0	2	6
K02050	ABC.SN.P; sulfonate/nitrate/taurine transport system permease protein	NitT/TauT family transport system	3	0	1	5
K02042	phnE; phosphonate transport system permease protein	Phosphonate transport system	3	0	0	1
K10112	msmX; multiple sugar transport system ATP-binding protein	Putative fructooligosaccharide transport system	3	0	2	2
K02026	ABC.MS.P1; multiple sugar transport system permease protein	Putative multiple sugar transport system	3	0	0	0
K10112	msmX; multiple sugar transport system ATP-binding protein	Putative multiple sugar transport system	3	0	2	2
K05813	ugpB; sn-glycerol 3-phosphate transport system substrate-binding protein	Putative sn-glycerol-phosphate transport system	3	1	0	1
K05815	ugpE; sn-glycerol 3-phosphate transport system permease protein	Putative sn-glycerol-phosphate transport system	3	0	0	1
K10112	msmX; multiple sugar transport system ATP-binding protein	Putative sorbitol/mannitol transport system	3	0	2	2
K10112	msmX; multiple sugar transport system ATP-binding protein	Raffinose/stachyose/melibiose transport system	3	0	2	2
K12368	dppA; dipeptide transport system substrate-binding protein	Dipeptide transport system	2	0	0	0
K09970	aapQ; general L-amino acid transport system permease protein	General L-amino acid transport system	2	0	0	0
K09970	aapQ; general L-amino acid transport system permease protein	General L-amino acid transport system	2	0	0	0
K09971	aapM; general L-amino acid transport system permease protein	General L-amino acid transport system	2	0	0	0
K09971	aapM; general L-amino acid transport system permease protein	General L-amino acid transport system	2	0	0	0
K12536	hasD; ATP-binding cassette, subfamily C, bacterial HasD	Hemophore/metalloprotease transport system	2	0	0	0
K12537	hasE; protease secretion protein HasE	Hemophore/metalloprotease transport system	2	0	0	0
K02013	ABC.FEV.A; iron complex transport system ATP-binding protein [EC:3.6.3.34]	Iron complex transport system	2	0	1	1
K02015	ABC.FEV.P; iron complex transport system permease protein	Iron complex transport system	2	0	0	0
K02016	ABC.FEV.S; iron complex transport system substrate-binding protein	Iron complex transport system	2	0	0	1
K02051	ABC.SN.S; sulfonate/nitrate/taurine transport system substrate-binding protein	NitT/TauT family transport system	2	0	0	3
K05846	ABC.BCP1.P; osmoprotectant transport system permease protein	Osmoprotectant transport system	2	1	0	2
K02032	ABC.PE.A1; peptide/nickel transport system ATP-binding protein	Peptides/nickel transport system	2	0	1	2
K02041	phnC; phosphonate transport system ATP-binding protein [EC:7.3.2.2]	Phosphonate transport system	2	0	0	1
K02044	phnD; phosphonate transport system substrate-binding protein	Phosphonate transport system	2	0	0	1
K02003	ABC.CD.A;	Putative ABC transport system	2	0	3	2
K02027	ABC.MS.S; multiple sugar transport system substrate-binding protein	Putative multiple sugar transport system	2	0	0	0
K05814	ugpA; sn-glycerol 3-phosphate transport system permease protein	Putative sn-glycerol-phosphate transport system	2	1	0	1
K02052	ABC.SP.A; putative spermidine/putrescine transport system ATP-binding protein	Putative spermidine/putrescine transport system	2	0	1	1
K02053	ABC.SP.P; putative spermidine/putrescine transport system permease protein	Putative spermidine/putrescine transport system	2	0	0	0
K02055	ABC.SP.S; putative spermidine/putrescine transport system substrate-binding protein	Putative spermidine/putrescine transport system	2	0	0	1
K15554	ssuC; sulfonate transport system permease protein	Sulfonate transport system	2	0	1	5
K01990	ABC-2.A; ABC-2 type transport system ATP-binding protein	ABC-2 type transport system	1	0	5	2
K01992	ABC-2.P; ABC-2 type transport system permease protein	ABC-2 type transport system	1	0	0	1
K03523	bioY; biotin transport system substrate-specific component	Biotin transport system	1	0	1	0
K09811	ftsX; cell division transport system permease protein	Cell division transport system	1	0	1	0
K09812	ftsE; cell division transport system ATP-binding protein	Cell division transport system	1	1	1	0
K16092	btuB; vitamin B12 transporter	Cobalamin salvage	1	0	0	1
K02071	ABC.MET.A; D-methionine transport system ATP-binding protein	D-Methionine transport system	1	1	0	2
K02071	ABC.MET.A; D-methionine transport system ATP-binding protein	D-Methionine transport system	1	1	0	2
K02072	ABC.MET.P; D-methionine transport system permease protein	D-Methionine transport system	1	1	0	2
K02072	ABC.MET.P; D-methionine transport system permease protein	D-Methionine transport system	1	1	0	2
K02073	ABC.MET.S; D-methionine transport system substrate-binding protein	D-Methionine transport system	1	0	0	3
K02073	ABC.MET.S; D-methionine transport system substrate-binding protein	D-Methionine transport system	1	0	0	3
K12369	dppB; dipeptide transport system permease protein	Dipeptide transport system	1	0	0	0
K12370	dppC; dipeptide transport system permease protein	Dipeptide transport system	1	1	0	0
K12371	dppD; dipeptide transport system ATP-binding protein	Dipeptide transport system	1	1	0	0
K12372	dppF; dipeptide transport system ATP-binding protein	Dipeptide transport system	1	1	0	0
K03523	bioY; biotin transport system substrate-specific component	Energy-coupling factor transport system	1	0	1	0
K02065	mlaF, linL, mkl; phospholipid/cholesterol/gamma-HCH transport system ATP-binding protein	gamma-Hexachlorocyclohexane transport system	1	0	1	2
K02066	mlaE, linK; phospholipid/cholesterol/gamma-HCH transport system permease protein	gamma-Hexachlorocyclohexane transport system	1	0	2	2
K02067	mlaD, linM; phospholipid/cholesterol/gamma-HCH transport system substrate-binding protein	gamma-Hexachlorocyclohexane transport system	1	0	5	2
K18480	linN; cholesterol transport system auxiliary component	gamma-Hexachlorocyclohexane transport system	1	0	0	1
K09972	aapP; general L-amino acid transport system ATP-binding protein [EC:3.6.3.-]	General L-amino acid transport system	1	0	0	0
K09972	aapP; general L-amino acid transport system ATP-binding protein [EC:3.6.3.-]	General L-amino acid transport system	1	0	0	0
K02001	proW; glycine betaine/proline transport system permease protein	Glycine betaine/proline transport system	1	1	0	0
K02002	proX; glycine betaine/proline transport system substrate-binding protein	Glycine betaine/proline transport system	1	1	0	0
K02193	ccmA; heme exporter ATP-binding protein CcmA [EC:3.6.3.41]	Heme transport system	1	0	0	0
K02194	ccmB; heme exporter membrane protein CcmB	Heme transport system	1	0	0	0
K02195	ccmC; heme exporter membrane protein CcmC	Heme transport system	1	0	0	0
K02010	ABC.FE.A; iron(III) transport system ATP-binding protein [EC:3.6.3.30]	Iron(III) transport system	1	0	0	0
K06861	lptB; lipopolysaccharide export system ATP-binding protein [EC:3.6.3.-]	Lipopolysaccharide export system	1	0	0	1
K07091	lptF; lipopolysaccharide export system permease protein	Lipopolysaccharide export system	1	0	0	1
K11720	lptG; lipopolysaccharide export system permease protein	Lipopolysaccharide export system	1	0	0	1
K09808	ABC.LPT.P; lipoprotein-releasing system permease protein	Lipoprotein-releasing system	1	1	0	1
K09810	ABC.LPT.A; lipoprotein-releasing system ATP-binding protein [EC:3.6.3.-]	Lipoprotein-releasing system	1	1	0	1
K02065	mlaF, linL, mkl; phospholipid/cholesterol/gamma-HCH transport system ATP-binding protein	Mce transport system	1	0	1	2
K02066	mlaE, linK; phospholipid/cholesterol/gamma-HCH transport system permease protein	Mce transport system	1	0	2	2
K02067	mlaD, linM; phospholipid/cholesterol/gamma-HCH transport system substrate-binding protein	Mce transport system	1	0	5	2
K13894	yejB; microcin C transport system permease protein	Microcin C transport system	1	0	0	1
K13895	yejE; microcin C transport system permease protein	Microcin C transport system	1	0	0	1
K13896	yejF; microcin C transport system ATP-binding protein	Microcin C transport system	1	0	0	0
K02017	modC; molybdate transport system ATP-binding protein [EC:3.6.3.29]	Molybdate transport system	1	0	1	0
K02018	modB; molybdate transport system permease protein	Molybdate transport system	1	0	1	1
K02020	modA; molybdate transport system substrate-binding protein	Molybdate transport system	1	0	1	1
K15580	oppA; oligopeptide transport system substrate-binding protein	Oligopeptide transport system	1	0	0	0
K05845	ABC.BCP1.S; osmoprotectant transport system substrate-binding protein	Osmoprotectant transport system	1	1	0	2
K05847	ABC.BCP1.A; osmoprotectant transport system ATP-binding protein	Osmoprotectant transport system	1	1	0	1
K02036	pstB; phosphate transport system ATP-binding protein [EC:7.3.2.1]	Phosphate transport system	1	0	1	1
K02037	pstC; phosphate transport system permease protein	Phosphate transport system	1	0	0	1
K02038	pstA; phosphate transport system permease protein	Phosphate transport system	1	0	1	1
K02040	pstS; phosphate transport system substrate-binding protein	Phosphate transport system	1	0	1	1
K02065	mlaF, linL, mkl; phospholipid/cholesterol/gamma-HCH transport system ATP-binding protein	Phospholipid transport system	1	0	1	2
K02066	mlaE, linK; phospholipid/cholesterol/gamma-HCH transport system permease protein	Phospholipid transport system	1	0	2	2
K02067	mlaD, linM; phospholipid/cholesterol/gamma-HCH transport system substrate-binding protein	Phospholipid transport system	1	0	5	2
K02793	PTS-Man-EIIA; PTS system, mannose-specific IIA component	PTS system, mannose-specific II component	1	0	0	1
K02004	ABC.CD.P;	Putative ABC transport system	1	0	2	3
K02074	ABC.ZM.A; zinc/manganese transport system ATP-binding protein	Putative zinc/manganese transport system	1	0	0	0
K02075	ABC.ZM.P; zinc/manganese transport system permease protein	Putative zinc/manganese transport system	1	0	0	0
K02077	ABC.ZM.S; zinc/manganese transport system substrate-binding protein	Putative zinc/manganese transport system	1	0	0	0
K11073	potF; putrescine transport system substrate-binding protein	Putrescine transport system	1	1	0	0
K11074	potI; putrescine transport system permease protein	Putrescine transport system	1	0	0	0
K11075	potH; putrescine transport system permease protein	Putrescine transport system	1	0	0	0
K11076	potG; putrescine transport system ATP-binding protein	Putrescine transport system	1	1	0	0
K02045	cysA; sulfate/thiosulfate transport system ATP-binding protein [EC:7.3.2.3]	Sulfate/thiosulfate transport system	1	1	1	1
K02045	cysA; sulfate/thiosulfate transport system ATP-binding protein [EC:7.3.2.3]	Sulfate/thiosulfate transport system	1	1	1	1
K02046	cysU; sulfate/thiosulfate transport system permease protein	Sulfate/thiosulfate transport system	1	0	1	1
K02046	cysU; sulfate/thiosulfate transport system permease protein	Sulfate/thiosulfate transport system	1	0	1	1
K02047	cysW; sulfate/thiosulfate transport system permease protein	Sulfate/thiosulfate transport system	1	1	1	1
K02047	cysW; sulfate/thiosulfate transport system permease protein	Sulfate/thiosulfate transport system	1	1	1	1
K23163	sbp; sulfate/thiosulfate transport system substrate-binding protein	Sulfate/thiosulfate transport system	1	1	0	1
K23163	sbp; sulfate/thiosulfate transport system substrate-binding protein	Sulfate/thiosulfate transport system	1	1	0	1
K15555	ssuB; sulfonate transport system ATP-binding protein [EC:3.6.3.-]	Sulfonate transport system	1	0	0	3
K11960	urtB; urea transport system permease protein	Urea transport system	1	0	0	1
K11961	urtC; urea transport system permease protein	Urea transport system	1	0	0	1
K11962	urtD; urea transport system ATP-binding protein	Urea transport system	1	0	0	1
K11963	urtE; urea transport system ATP-binding protein	Urea transport system	1	0	0	1
K12541	lapB; ATP-binding cassette, subfamily C, bacterial LapB	Adhesin protein transport system	0	1	0	0
K12542	lapC; membrane fusion protein LapC	Adhesin protein transport system	0	1	0	0
K10234	aglG; alpha-glucoside transport system permease protein	alpha-Glucoside transport system	0	0	1	0
K12340	tolC; outer membrane channel protein TolC	alpha-Hemolysin/cyclolysin transport system	0	0	0	3
K10543	xylF; D-xylose transport system substrate-binding protein	D-Xylose transport system	0	0	1	0
K10544	xylH; D-xylose transport system permease protein	D-Xylose transport system	0	0	1	0
K10545	xylG; D-xylose transport system ATP-binding protein [EC:3.6.3.17]	D-Xylose transport system	0	0	1	0
K10005	gluB; glutamate transport system substrate-binding protein	Glutamate transport system	0	0	1	0
K10005	gluB; glutamate transport system substrate-binding protein	Glutamate transport system	0	0	1	0
K10006	gluC; glutamate transport system permease protein	Glutamate transport system	0	0	1	0
K10006	gluC; glutamate transport system permease protein	Glutamate transport system	0	0	1	0
K10007	gluD; glutamate transport system permease protein	Glutamate transport system	0	0	1	0
K10007	gluD; glutamate transport system permease protein	Glutamate transport system	0	0	1	0
K10008	gluA; glutamate transport system ATP-binding protein [EC:7.4.2.1]	Glutamate transport system	0	0	1	0
K10008	gluA; glutamate transport system ATP-binding protein [EC:7.4.2.1]	Glutamate transport system	0	0	1	0
K10001	gltI; glutamate/aspartate transport system substrate-binding protein	Glutamate/aspartate transport system	0	0	0	6
K10001	gltI; glutamate/aspartate transport system substrate-binding protein	Glutamate/aspartate transport system	0	0	0	6
K10002	gltK; glutamate/aspartate transport system permease protein	Glutamate/aspartate transport system	0	0	0	1
K10002	gltK; glutamate/aspartate transport system permease protein	Glutamate/aspartate transport system	0	0	0	1
K10003	gltJ; glutamate/aspartate transport system permease protein	Glutamate/aspartate transport system	0	0	0	1
K10003	gltJ; glutamate/aspartate transport system permease protein	Glutamate/aspartate transport system	0	0	0	1
K10004	gltL; glutamate/aspartate transport system ATP-binding protein [EC:7.4.2.1]	Glutamate/aspartate transport system	0	0	0	1
K10004	gltL; glutamate/aspartate transport system ATP-binding protein [EC:7.4.2.1]	Glutamate/aspartate transport system	0	0	0	1
K13889	gsiB; glutathione transport system substrate-binding protein	Glutathione transport system	0	0	0	1
K13890	gsiC; glutathione transport system permease protein	Glutathione transport system	0	0	0	1
K13891	gsiD; glutathione transport system permease protein	Glutathione transport system	0	1	0	1
K13892	gsiA; glutathione transport system ATP-binding protein	Glutathione transport system	0	0	0	1
K17321	glpV; glycerol transport system substrate-binding protein	Glycerol transport system	0	0	0	1
K17322	glpP; glycerol transport system permease protein	Glycerol transport system	0	0	0	1
K17323	glpQ; glycerol transport system permease protein	Glycerol transport system	0	0	0	1
K17324	glpS; glycerol transport system ATP-binding protein	Glycerol transport system	0	0	0	1
K17325	glpT; glycerol transport system ATP-binding protein	Glycerol transport system	0	0	0	1
K02000	proV; glycine betaine/proline transport system ATP-binding protein [EC:3.6.3.32]	Glycine betaine/proline transport system	0	1	0	0
K02424	fliY, tcyA; L-cystine transport system substrate-binding protein	L-Cystine transport system	0	0	0	1
K02424	fliY, tcyA; L-cystine transport system substrate-binding protein	L-Cystine transport system	0	0	0	1
K10009	tcyB, yecS; L-cystine transport system permease protein	L-Cystine transport system	0	0	0	1
K10009	tcyB, yecS; L-cystine transport system permease protein	L-Cystine transport system	0	0	0	1
K09694	nodJ; lipooligosaccharide transport system permease protein	Lipooligosaccharide transport system	0	0	2	1
K09695	nodI; lipooligosaccharide transport system ATP-binding protein	Lipooligosaccharide transport system	0	0	1	1
K10013	ABC.ARG.S; lysine/arginine/ornithine transport system substrate-binding protein	Lysine/arginine/ornithine transport system	0	1	0	0
K10013	ABC.ARG.S; lysine/arginine/ornithine transport system substrate-binding protein	Lysine/arginine/ornithine transport system	0	1	0	0
K10108	malE; maltose/maltodextrin transport system substrate-binding protein	Maltose/maltodextrin transport system	0	1	0	0
K10111	malK; maltose/maltodextrin transport system ATP-binding protein [EC:3.6.3.19]	Maltose/maltodextrin transport system	0	1	0	0
K18481	mas; Mce-associated membrane protein	Mce transport system	0	0	1	0
K13893	yejA; microcin C transport system substrate-binding protein	Microcin C transport system	0	0	0	1
K10200	ABC.NGC.S; N-acetylglucosamine transport system substrate-binding protein	N-Acetylglucosamine transport system	0	0	1	0
K10201	ABC.NGC.P; N-acetylglucosamine transport system permease protein	N-Acetylglucosamine transport system	0	0	1	0
K10202	ABC.NGC.P1; N-acetylglucosamine transport system permease protein	N-Acetylglucosamine transport system	0	0	1	0
K07122	mlaB; phospholipid transport system transporter-binding protein	Phospholipid transport system	0	0	0	1
K07323	mlaC; phospholipid transport system substrate-binding protein	Phospholipid transport system	0	0	0	2
K02750	PTS-Glv-EIIC; PTS system, alpha-glucoside-specific IIC component	PTS system, alpha-glucoside-specific II component	0	1	0	0
K02821	PTS-Ula-EIIA; PTS system, ascorbate-specific IIA component	PTS system, ascorbate-specific II component	0	2	0	0
K02822	PTS-Ula-EIIB; PTS system, ascorbate-specific IIB component	PTS system, ascorbate-specific II component	0	2	0	0
K03475	PTS-Ula-EIIC; PTS system, ascorbate-specific IIC component	PTS system, ascorbate-specific II component	0	1	0	0
K02752	PTS-Asc-EIIB; PTS system, beta-glucoside (arbutin/salicin/cellobiose)-specific IIB component	PTS system, beta-glucoside (arbutin/salicin/cellobiose)-specific II component	0	0	0	0
K02753	PTS-Asc-EIIC; PTS system, beta-glucoside (arbutin/salicin/cellobiose)-specific IIC component	PTS system, beta-glucoside (arbutin/salicin/cellobiose)-specific II component	0	1	0	0
K02761	PTS-Cel-EIIC; PTS system, cellobiose-specific IIC component	PTS system, cellobiose-specific II component	0	1	0	0
K02800	PTS-Mtl-EIIC; PTS system, mannitol-specific IIC component	PTS system, mannitol-specific II component	0	0	1	0
K01989	ABC.X4.S; putative ABC transport system substrate-binding protein	Putative ABC transport system	0	0	0	1
K02068	ABC.X2.A; putative ABC transport system ATP-binding protein	Putative ABC transport system	0	0	0	0
K02069	ABC.X2.P; putative ABC transport system permease protein	Putative ABC transport system	0	0	0	0
K05832	ABC.X4.P; putative ABC transport system permease protein	Putative ABC transport system	0	0	0	1
K05833	ABC.X4.A; putative ABC transport system ATP-binding protein	Putative ABC transport system	0	0	0	1
K10111	malK; multiple sugar transport system ATP-binding protein [EC:3.6.3.-]	Putative multiple sugar transport system	0	1	0	0
K02057	ABC.SS.P; simple sugar transport system permease protein	Putative simple sugar transport system	0	0	1	0
K02058	ABC.SS.S; simple sugar transport system substrate-binding protein	Putative simple sugar transport system	0	1	1	0
K10111	malK; multiple sugar transport system ATP-binding protein [EC:3.6.3.-]	Putative sorbitol/mannitol transport system	0	1	0	0
K10117	msmE; raffinose/stachyose/melibiose transport system substrate-binding protein	Raffinose/stachyose/melibiose transport system	0	0	1	0
K10118	msmF; raffinose/stachyose/melibiose transport system permease protein	Raffinose/stachyose/melibiose transport system	0	0	1	0
K10119	msmG; raffinose/stachyose/melibiose transport system permease protein	Raffinose/stachyose/melibiose transport system	0	0	1	0
K10559	rhaS1; rhamnose transport system substrate-binding protein	Rhamnose transport system	0	0	1	0
K10560	rhaP; rhamnose transport system permease protein	Rhamnose transport system	0	0	0	0
K10561	rhaQ; rhamnose transport system permease protein	Rhamnose transport system	0	0	0	0
K10562	rhaT; rhamnose transport system ATP-binding protein [EC:3.6.3.17]	Rhamnose transport system	0	0	1	0
K12340	tolC; outer membrane channel protein TolC	RTX toxin transport system	0	0	0	3
K11070	potC; spermidine/putrescine transport system permease protein	Spermidine/putrescine transport system	0	0	1	0
K11071	potB; spermidine/putrescine transport system permease protein	Spermidine/putrescine transport system	0	0	1	0
K02048	cysP; sulfate/thiosulfate transport system substrate-binding protein	Sulfate/thiosulfate transport system	0	1	0	0
K02048	cysP; sulfate/thiosulfate transport system substrate-binding protein	Sulfate/thiosulfate transport system	0	1	0	0
K15553	ssuA; sulfonate transport system substrate-binding protein	Sulfonate transport system	0	0	0	4
K18476	tetR; TetR/AcrR family transcriptional regulator, tetracycline repressor protein	Tetracycline resistance, TetA transporter	0	0	3	0
K02063	ABC.VB1.P; thiamine transport system permease protein	Thiamine transport system	0	0	1	0
K02064	ABC.VB1.S; thiamine transport system substrate-binding protein	Thiamine transport system	0	0	1	0
K10111	malK; multiple sugar transport system ATP-binding protein [EC:3.6.3.-]	Trehalose/maltose transport system	0	1	0	0
K10238	thuG; trehalose/maltose transport system permease protein	Trehalose/maltose transport system	0	0	1	0
K11959	urtA; urea transport system substrate-binding protein	Urea transport system	0	0	0	1
K09815	znuA; zinc transport system substrate-binding protein	Zinc transport system	0	0	1	0
K09816	znuB; zinc transport system permease protein	Zinc transport system	0	0	1	0
			378	62	125	299
								data	K02035	K02033	K02034	K02029	K02029	K02030	K02030	K01995	K01995	K01997	K01997	K01999	K01999	K01996	K01996	K01998	K01998	K02031	K02011	K02012	K02028	K02028	K02025	K09969	K09969	K10112	K10112	K10112	K10112	K10112	K10112	K02049	K02050	K02042	K10112	K02026	K10112	K05813	K05815	K10112	K10112
gene_id	gene_description	module	CER48	CER55	CER28	CER94		annotation	Peptides/nickel transport system	Peptides/nickel transport system	Peptides/nickel transport system	Putative polar amino acid transport system	Putative polar amino acid transport system	Putative polar amino acid transport system	Putative polar amino acid transport system	Branched-chain amino acid transport system	Branched-chain amino acid transport system	Branched-chain amino acid transport system	Branched-chain amino acid transport system	Branched-chain amino acid transport system	Branched-chain amino acid transport system	Branched-chain amino acid transport system	Branched-chain amino acid transport system	Branched-chain amino acid transport system	Branched-chain amino acid transport system	Peptides/nickel transport system	Iron(III) transport system	Iron(III) transport system	Putative polar amino acid transport system	Putative polar amino acid transport system	Putative multiple sugar transport system	General L-amino acid transport system	General L-amino acid transport system	alpha-Glucoside transport system	Arabinosaccharide transport system	Cellobiose transport system	Glucose/mannose transport system	Maltose/maltodextrin transport system	N,N'-Diacetylchitobiose transport system	NitT/TauT family transport system	NitT/TauT family transport system	Phosphonate transport system	Putative fructooligosaccharide transport system	Putative multiple sugar transport system	Putative multiple sugar transport system	Putative sn-glycerol-phosphate transport system	Putative sn-glycerol-phosphate transport system	Putative sorbitol/mannitol transport system	Raffinose/stachyose/melibiose transport system
K01990	ABC-2.A; ABC-2 type transport system ATP-binding protein	ABC	1	0	5	2		CER48	21	17	17	9	9	9	9	8	8	8	8	8	8	7	7	7	7	7	6	6	6	6	5	4	4	3	3	3	3	3	3	3	3	3	3	3	3	3	3	3	3
K01992	ABC-2.P; ABC-2 type transport system permease protein	ABC	1	0	0	1		CER55	0	2	1	1	1	0	0	1	1	1	1	0	0	1	1	1	1	0	0	0	1	1	0	0	0	0	0	0	0	0	0	0	0	0	0	0	0	1	0	0	0
K10112	msmX; multiple sugar transport system ATP-binding protein	Sugar	3	0	2	2		CER28	0	1	0	0	0	0	0	1	1	1	1	0	0	1	1	1	1	2	0	0	0	0	0	0	0	2	2	2	2	2	2	2	1	0	2	0	2	0	0	2	2
K09970	aapQ; general L-amino acid transport system permease protein	Amino_Acid	2	0	0	0		CER94	3	2	2	1	1	3	3	9	9	10	10	15	15	9	9	6	6	3	0	1	2	2	0	0	0	2	2	2	2	2	2	6	5	1	2	0	2	1	1	2	2
K09970	aapQ; general L-amino acid transport system permease protein	Amino_Acid	2	0	0	0
K09971	aapM; general L-amino acid transport system permease protein	Amino_Acid	2	0	0	0
K09971	aapM; general L-amino acid transport system permease protein	Amino_Acid	2	0	0	0
K10112	msmX; multiple sugar transport system ATP-binding protein	Sugar	3	0	2	2
K03523	bioY; biotin transport system substrate-specific component	Vitamin	1	0	1	0
K01995	livG; branched-chain amino acid transport system ATP-binding protein	Amino_Acid	8	1	1	9
K01995	livG; branched-chain amino acid transport system ATP-binding protein	Amino_Acid	8	1	1	9
K01997	livH; branched-chain amino acid transport system permease protein	Amino_Acid	8	1	1	10
K01997	livH; branched-chain amino acid transport system permease protein	Amino_Acid	8	1	1	10
K01999	livK; branched-chain amino acid transport system substrate-binding protein	Amino_Acid	8	0	0	15
K01999	livK; branched-chain amino acid transport system substrate-binding protein	Amino_Acid	8	0	0	15
K01996	livF; branched-chain amino acid transport system ATP-binding protein	Amino_Acid	7	1	1	9
K01996	livF; branched-chain amino acid transport system ATP-binding protein	Amino_Acid	7	1	1	9
K01998	livM; branched-chain amino acid transport system permease protein	Amino_Acid	7	1	1	6
K01998	livM; branched-chain amino acid transport system permease protein	Amino_Acid	7	1	1	6
K10112	msmX; multiple sugar transport system ATP-binding protein	Sugar	3	0	2	2
K02071	ABC.MET.A; D-methionine transport system ATP-binding protein	Vitamin	1	1	0	2
K02071	ABC.MET.A; D-methionine transport system ATP-binding protein	Vitamin	1	1	0	2
K02072	ABC.MET.P; D-methionine transport system permease protein	Vitamin	1	1	0	2
K02072	ABC.MET.P; D-methionine transport system permease protein	Vitamin	1	1	0	2
K02073	ABC.MET.S; D-methionine transport system substrate-binding protein	Vitamin	1	0	0	3
K02073	ABC.MET.S; D-methionine transport system substrate-binding protein	Vitamin	1	0	0	3
K12368	dppA; dipeptide transport system substrate-binding protein	Peptide	2	0	0	0
K02065	mlaF, linL, mkl; phospholipid/cholesterol/gamma-HCH transport system ATP-binding protein	gamma-Hexachlorocyclohexane transport system	1	0	1	2
K02066	mlaE, linK; phospholipid/cholesterol/gamma-HCH transport system permease protein	Other	1	0	2	2
K02067	mlaD, linM; phospholipid/cholesterol/gamma-HCH transport system substrate-binding protein	Other	1	0	5	2
K18480	linN; cholesterol transport system auxiliary component	Other	1	0	0	1
K09969	aapJ; general L-amino acid transport system substrate-binding protein	Amino_Acid	4	0	0	0
K09969	aapJ; general L-amino acid transport system substrate-binding protein	Amino_Acid	4	0	0	0
K09972	aapP; general L-amino acid transport system ATP-binding protein [EC:3.6.3.-]	Amino_Acid	1	0	0	0
K09972	aapP; general L-amino acid transport system ATP-binding protein [EC:3.6.3.-]	Amino_Acid	1	0	0	0
K10112	msmX; multiple sugar transport system ATP-binding protein	Sugar	3	0	2	2
K10001	gltI; glutamate/aspartate transport system substrate-binding protein	Sugar	0	0	0	6
K10001	gltI; glutamate/aspartate transport system substrate-binding protein	Sugar	0	0	0	6
K02001	proW; glycine betaine/proline transport system permease protein	Amino_Acid	1	1	0	0
K02002	proX; glycine betaine/proline transport system substrate-binding protein	Amino_Acid	1	1	0	0
K02193	ccmA; heme exporter ATP-binding protein CcmA [EC:3.6.3.41]	Inorganic	1	0	0	0
K02194	ccmB; heme exporter membrane protein CcmB	Inorganic	1	0	0	0
K02195	ccmC; heme exporter membrane protein CcmC	Inorganic	1	0	0	0
K12536	hasD; ATP-binding cassette, subfamily C, bacterial HasD	Inorganic	2	0	0	0
K12537	hasE; protease secretion protein HasE	Inorganic	2	0	0	0
K02013	ABC.FEV.A; iron complex transport system ATP-binding protein [EC:3.6.3.34]	Iron	2	0	1	1
K02015	ABC.FEV.P; iron complex transport system permease protein	Iron	2	0	0	0
K02016	ABC.FEV.S; iron complex transport system substrate-binding protein	Iron	2	0	0	1
K02011	ABC.FE.P; iron(III) transport system permease protein	Iron	6	0	0	0
K02012	ABC.FE.S; iron(III) transport system substrate-binding protein	Iron	6	0	0	1
K02010	ABC.FE.A; iron(III) transport system ATP-binding protein [EC:3.6.3.30]	Iron	1	0	0	0
K06861	lptB; lipopolysaccharide export system ATP-binding protein [EC:3.6.3.-]	Lipopolysaccharide	1	0	0	1
K07091	lptF; lipopolysaccharide export system permease protein	Lipopolysaccharide	1	0	0	1
K11720	lptG; lipopolysaccharide export system permease protein	Lipopolysaccharide	1	0	0	1
K09808	ABC.LPT.P; lipoprotein-releasing system permease protein	Lipopolysaccharide	1	1	0	1
K09810	ABC.LPT.A; lipoprotein-releasing system ATP-binding protein [EC:3.6.3.-]	Lipopolysaccharide	1	1	0	1
K10112	msmX; maltose/maltodextrin transport system ATP-binding protein	Sugar	3	0	2	2
K02065	mlaF, linL, mkl; phospholipid/cholesterol/gamma-HCH transport system ATP-binding protein	Other	1	0	1	2
K02066	mlaE, linK; phospholipid/cholesterol/gamma-HCH transport system permease protein	Other	1	0	2	2
K02067	mlaD, linM; phospholipid/cholesterol/gamma-HCH transport system substrate-binding protein	Other	1	0	5	2
K02018	modB; molybdate transport system permease protein	Inorganic	1	0	1	1
K02020	modA; molybdate transport system substrate-binding protein	Inorganic	1	0	1	1
K10112	msmX; multiple sugar transport system ATP-binding protein	Inorganic	3	0	2	2
K02049	ABC.SN.A; sulfonate/nitrate/taurine transport system ATP-binding protein	Other	3	0	2	6
K02050	ABC.SN.P; sulfonate/nitrate/taurine transport system permease protein	Other	3	0	1	5
K02051	ABC.SN.S; sulfonate/nitrate/taurine transport system substrate-binding protein	Other	2	0	0	3
K15580	oppA; oligopeptide transport system substrate-binding protein	Peptide	1	0	0	0
K05846	ABC.BCP1.P; osmoprotectant transport system permease protein	Osmoprotectant	2	1	0	2
K05845	ABC.BCP1.S; osmoprotectant transport system substrate-binding protein	Osmoprotectant	1	1	0	2
K05847	ABC.BCP1.A; osmoprotectant transport system ATP-binding protein	Osmoprotectant	1	1	0	1
K02035	ABC.PE.S; peptide/nickel transport system substrate-binding protein	Nickel	21	0	0	3
K02033	ABC.PE.P; peptide/nickel transport system permease protein	Nickel	17	2	1	2
K02034	ABC.PE.P1; peptide/nickel transport system permease protein	Nickel	17	1	0	2
K02031	ABC.PE.A; peptide/nickel transport system ATP-binding protein	Nickel	7	0	2	3
K02032	ABC.PE.A1; peptide/nickel transport system ATP-binding protein	Nickel	2	0	1	2
K02036	pstB; phosphate transport system ATP-binding protein [EC:7.3.2.1]	Phosphate	1	0	1	1
K02037	pstC; phosphate transport system permease protein	Phosphate	1	0	0	1
K02038	pstA; phosphate transport system permease protein	Phosphate	1	0	1	1
K02040	pstS; phosphate transport system substrate-binding protein	Phosphate	1	0	1	1
K02065	mlaF, linL, mkl; phospholipid/cholesterol/gamma-HCH transport system ATP-binding protein	Phosphate	1	0	1	2
K02066	mlaE, linK; phospholipid/cholesterol/gamma-HCH transport system permease protein	Phosphate	1	0	2	2
K02067	mlaD, linM; phospholipid/cholesterol/gamma-HCH transport system substrate-binding protein	Phosphate	1	0	5	2
K02042	phnE; phosphonate transport system permease protein	Phosphate	3	0	0	1
K02041	phnC; phosphonate transport system ATP-binding protein [EC:7.3.2.2]	Phosphate	2	0	0	1
K02044	phnD; phosphonate transport system substrate-binding protein	Phosphate	2	0	0	1
K02793	PTS-Man-EIIA; PTS system, mannose-specific IIA component	Sugar	1	0	0	1
K02003	ABC.CD.A;	ABC	2	0	3	2
K02004	ABC.CD.P;	ABC	1	0	2	3
K10112	msmX; multiple sugar transport system ATP-binding protein	Sugar	3	0	2	2
K02025	ABC.MS.P; multiple sugar transport system permease protein	Sugar	5	0	0	0
K02026	ABC.MS.P1; multiple sugar transport system permease protein	Sugar	3	0	0	0
K10112	msmX; multiple sugar transport system ATP-binding protein	Sugar	3	0	2	2
K02027	ABC.MS.S; multiple sugar transport system substrate-binding protein	Sugar	2	0	0	0
K02029	ABC.PA.P; polar amino acid transport system permease protein	Amino_Acid	9	1	0	1
K02029	ABC.PA.P; polar amino acid transport system permease protein	Amino_Acid	9	1	0	1
K02030	ABC.PA.S; polar amino acid transport system substrate-binding protein	Amino_Acid	9	0	0	3
K02030	ABC.PA.S; polar amino acid transport system substrate-binding protein	Amino_Acid	9	0	0	3
K02028	ABC.PA.A; polar amino acid transport system ATP-binding protein [EC:7.4.2.1]	Amino_Acid	6	1	0	2
K02028	ABC.PA.A; polar amino acid transport system ATP-binding protein [EC:7.4.2.1]	Amino_Acid	6	1	0	2
K05813	ugpB; sn-glycerol 3-phosphate transport system substrate-binding protein	Phosphate	3	1	0	1
K05815	ugpE; sn-glycerol 3-phosphate transport system permease protein	Phosphate	3	0	0	1
K05814	ugpA; sn-glycerol 3-phosphate transport system permease protein	Phosphate	2	1	0	1
K10112	msmX; multiple sugar transport system ATP-binding protein	Sugar	3	0	2	2
K02052	ABC.SP.A; putative spermidine/putrescine transport system ATP-binding protein	Vitamin	2	0	1	1
K02053	ABC.SP.P; putative spermidine/putrescine transport system permease protein	Vitamin	2	0	0	0
K02055	ABC.SP.S; putative spermidine/putrescine transport system substrate-binding protein	Vitamin	2	0	0	1
K10112	msmX; multiple sugar transport system ATP-binding protein	Sugar	3	0	2	2
K12340	tolC; outer membrane channel protein TolC	Toxin	0	0	0	3
K02045	cysA; sulfate/thiosulfate transport system ATP-binding protein [EC:7.3.2.3]	Sulfate	1	1	1	1
K02045	cysA; sulfate/thiosulfate transport system ATP-binding protein [EC:7.3.2.3]	Sulfate	1	1	1	1
K02046	cysU; sulfate/thiosulfate transport system permease protein	Sulfate	1	0	1	1
K02046	cysU; sulfate/thiosulfate transport system permease protein	Sulfate	1	0	1	1
K02047	cysW; sulfate/thiosulfate transport system permease protein	Sulfate	1	1	1	1
K02047	cysW; sulfate/thiosulfate transport system permease protein	Sulfate	1	1	1	1
K23163	sbp; sulfate/thiosulfate transport system substrate-binding protein	Sulfate	1	1	0	1
K23163	sbp; sulfate/thiosulfate transport system substrate-binding protein	Sulfate	1	1	0	1
K15554	ssuC; sulfonate transport system permease protein	Other	2	0	1	5
K15555	ssuB; sulfonate transport system ATP-binding protein [EC:3.6.3.-]	Other	1	0	0	3
K15553	ssuA; sulfonate transport system substrate-binding protein	Other	0	0	0	4
K11960	urtB; urea transport system permease protein	Other	1	0	0	1
K11961	urtC; urea transport system permease protein	Other	1	0	0	1
K11962	urtD; urea transport system ATP-binding protein	Other	1	0	0	1
K11963	urtE; urea transport system ATP-binding protein	Other	1	0	0	1
			359	34	84	264
[truncated: 85 more columns]

## Sheet: Table S5
Table S5. Distribution of Plant Growth-Promoting Traits (PGPTs) in the genome of four Cerrado strains
ID	Lv1	Lv2	Lv3	Lv4	Lv5	PGPT_ID	CER28	CER94	CER48	CER55
PGPT0000020	DIRECT_EFFECTS	BIO-FERTILIZATION	NITROGEN_ACQUISITION	N-AQUISITION-ATMOSHPHERIC_NITROGEN_FIXATION	N-FIX-NITROGENASE_BIOSYNTHESIS	PGPT0000020-nifF|fldA|isiB-K03839	0	0	0	1
PGPT0000050	DIRECT_EFFECTS	BIO-FERTILIZATION	NITROGEN_ACQUISITION	N-AQUISITION-ATMOSHPHERIC_NITROGEN_FIXATION	N-FIX-NITROGENASE_BIOSYNTHESIS	PGPT0000050-nifM-K03769	0	3	2	2
PGPT0000065	DIRECT_EFFECTS	BIO-FERTILIZATION	NITROGEN_ACQUISITION	N-AQUISITION-ATMOSHPHERIC_NITROGEN_FIXATION	N-FIX-NITROGENASE_BIOSYNTHESIS# PGPT	PGPT0000065-nifS|iscS-K04487	3	1	1	2
PGPT0000075	DIRECT_EFFECTS	BIO-FERTILIZATION	NITROGEN_ACQUISITION	N-AQUISITION-ATMOSHPHERIC_NITROGEN_FIXATION	N-FIX-NITROGENASE_BIOSYNTHESIS	PGPT0000075-nifU|iscU-K04488	1	1	1	1
PGPT0000080	DIRECT_EFFECTS	BIO-FERTILIZATION	NITROGEN_ACQUISITION	N-AQUISITION-ATMOSHPHERIC_NITROGEN_FIXATION	N-FIX-NITROGENASE_BIOSYNTHESIS	PGPT0000080-nifV-K02594	2	1	2	1
PGPT0000135	DIRECT_EFFECTS	BIO-FERTILIZATION	NITROGEN_ACQUISITION	N-AQUISITION-ATMOSHPHERIC_NITROGEN_FIXATION	N-FIX-OTHER_NITROGEN_FIXATION_REGULATORS	PGPT0000135-ptsN-K02806	0	1	1	1
PGPT0000140	DIRECT_EFFECTS	BIO-FERTILIZATION	NITROGEN_ACQUISITION	N-AQUISITION-ATMOSHPHERIC_NITROGEN_FIXATION	N-FIX-OTHER_NITROGEN_FIXATION_REGULATORS# PGPT	PGPT0000140-fixL-K14986	0	2	1	0
PGPT0000145	DIRECT_EFFECTS	BIO-FERTILIZATION	NITROGEN_ACQUISITION	N-AQUISITION-ATMOSHPHERIC_NITROGEN_FIXATION	N-FIX-OTHER_NITROGEN_FIXATION_REGULATORS# PGPT	PGPT0000145-fixJ-K14987	0	2	1	0
PGPT0000152	DIRECT_EFFECTS	BIO-FERTILIZATION	NITROGEN_ACQUISITION	N-AQUISITION-ATMOSHPHERIC_NITROGEN_FIXATION	CBB3-TYPE_CYTOCHROME_C_OXIDASE# PGPT	PGPT0000152-fixO|ccoO-K00405	0	1	1	0
PGPT0000153	DIRECT_EFFECTS	BIO-FERTILIZATION	NITROGEN_ACQUISITION	N-AQUISITION-ATMOSHPHERIC_NITROGEN_FIXATION	CBB3-TYPE_CYTOCHROME_C_OXIDASE# PGPT	PGPT0000153-fixP|ccoP-K00406	0	1	1	0
PGPT0000154	DIRECT_EFFECTS	BIO-FERTILIZATION	NITROGEN_ACQUISITION	N-AQUISITION-ATMOSHPHERIC_NITROGEN_FIXATION	CBB3-TYPE_CYTOCHROME_C_OXIDASE# PGPT	PGPT0000154-fixQ|ccoQ-K00407	0	1	1	0
PGPT0000155	DIRECT_EFFECTS	BIO-FERTILIZATION	NITROGEN_ACQUISITION	N-AQUISITION-ATMOSHPHERIC_NITROGEN_FIXATION	N-FIX-HYDROGENASE_BIOSYNTHESIS	PGPT0000155-hyfA-K12136	0	0	0	2
PGPT0000160	DIRECT_EFFECTS	BIO-FERTILIZATION	NITROGEN_ACQUISITION	N-AQUISITION-ATMOSHPHERIC_NITROGEN_FIXATION	N-FIX-HYDROGENASE_BIOSYNTHESIS	PGPT0000160-hyfB-K12137	0	0	0	2
PGPT0000165	DIRECT_EFFECTS	BIO-FERTILIZATION	NITROGEN_ACQUISITION	N-AQUISITION-ATMOSHPHERIC_NITROGEN_FIXATION	N-FIX-HYDROGENASE_BIOSYNTHESIS	PGPT0000165-hyfC-K12138	0	0	0	2
PGPT0000185	DIRECT_EFFECTS	BIO-FERTILIZATION	NITROGEN_ACQUISITION	N-AQUISITION-ATMOSHPHERIC_NITROGEN_FIXATION	N-FIX-HYDROGENASE_BIOSYNTHESIS	PGPT0000185-hyfG-K12142	0	0	0	2
PGPT0000190	DIRECT_EFFECTS	BIO-FERTILIZATION	NITROGEN_ACQUISITION	N-AQUISITION-ATMOSHPHERIC_NITROGEN_FIXATION	N-FIX-HYDROGENASE_BIOSYNTHESIS	PGPT0000190-hyfH-K12143	0	0	0	1
PGPT0000195	DIRECT_EFFECTS	BIO-FERTILIZATION	NITROGEN_ACQUISITION	N-AQUISITION-ATMOSHPHERIC_NITROGEN_FIXATION	N-FIX-HYDROGENASE_BIOSYNTHESIS	PGPT0000195-hyfI-K12144	0	0	0	1
PGPT0000200	DIRECT_EFFECTS	BIO-FERTILIZATION	NITROGEN_ACQUISITION	N-AQUISITION-ATMOSHPHERIC_NITROGEN_FIXATION	N-FIX-HYDROGENASE_BIOSYNTHESIS	PGPT0000200-hyfJ-K12145	0	0	0	1
PGPT0000205	DIRECT_EFFECTS	BIO-FERTILIZATION	NITROGEN_ACQUISITION	N-AQUISITION-ATMOSHPHERIC_NITROGEN_FIXATION	N-FIX-HYDROGENASE_BIOSYNTHESIS	PGPT0000205-hyfR-K12146	0	0	0	1
PGPT0000235	DIRECT_EFFECTS	BIO-FERTILIZATION	NITROGEN_ACQUISITION	N-AQUISITION-ATMOSHPHERIC_NITROGEN_FIXATION	N-FIX-HYDROGENASE_BIOSYNTHESIS	PGPT0000235-hyaD|hybD|hupD-K03605	0	0	1	1
PGPT0000240	DIRECT_EFFECTS	BIO-FERTILIZATION	NITROGEN_ACQUISITION	N-AQUISITION-ATMOSHPHERIC_NITROGEN_FIXATION	N-FIX-HYDROGENASE_BIOSYNTHESIS	PGPT0000240-hypA|hybF-K04651	0	0	0	1
PGPT0000245	DIRECT_EFFECTS	BIO-FERTILIZATION	NITROGEN_ACQUISITION	N-AQUISITION-ATMOSHPHERIC_NITROGEN_FIXATION	N-FIX-HYDROGENASE_BIOSYNTHESIS	PGPT0000245-hypB|hupJ-K04652	0	0	0	1
PGPT0000250	DIRECT_EFFECTS	BIO-FERTILIZATION	NITROGEN_ACQUISITION	N-AQUISITION-ATMOSHPHERIC_NITROGEN_FIXATION	N-FIX-HYDROGENASE_BIOSYNTHESIS	PGPT0000250-hypC|hupF-K04653	0	0	0	1
PGPT0000255	DIRECT_EFFECTS	BIO-FERTILIZATION	NITROGEN_ACQUISITION	N-AQUISITION-ATMOSHPHERIC_NITROGEN_FIXATION	N-FIX-HYDROGENASE_BIOSYNTHESIS	PGPT0000255-hypD-K04654	0	0	0	1
PGPT0000260	DIRECT_EFFECTS	BIO-FERTILIZATION	NITROGEN_ACQUISITION	N-AQUISITION-ATMOSHPHERIC_NITROGEN_FIXATION	N-FIX-HYDROGENASE_BIOSYNTHESIS	PGPT0000260-hypE-K04655	0	0	0	2
PGPT0000265	DIRECT_EFFECTS	BIO-FERTILIZATION	NITROGEN_ACQUISITION	N-AQUISITION-ATMOSHPHERIC_NITROGEN_FIXATION	N-FIX-HYDROGENASE_BIOSYNTHESIS	PGPT0000265-hypF-K04656	0	1	1	0
PGPT0000285	DIRECT_EFFECTS	BIO-FERTILIZATION	NITROGEN_ACQUISITION	N-AQUISITION-DENITRIFICATION|NITRATE_USAGE	DENITRIFICATION-NITRATE_REDUCTION# PGPT	PGPT0000285-narG|narZ|nxrA-K00370	1	0	0	4
PGPT0000300	DIRECT_EFFECTS	BIO-FERTILIZATION	NITROGEN_ACQUISITION	N-AQUISITION-DENITRIFICATION|NITRATE_USAGE	DENITRIFICATION-NITRATE_REDUCTION	PGPT0000300-narK|nrtP|nrt|narU-K02575	1	2	2	2
PGPT0000305	DIRECT_EFFECTS	BIO-FERTILIZATION	NITROGEN_ACQUISITION	N-AQUISITION-DENITRIFICATION|NITRATE_USAGE	DENITRIFICATION-NITRATE_REDUCTION# PGPT	PGPT0000305-narX-K07673	0	0	0	1
PGPT0000310	DIRECT_EFFECTS	BIO-FERTILIZATION	NITROGEN_ACQUISITION	N-AQUISITION-DENITRIFICATION|NITRATE_USAGE	DENITRIFICATION-NITRATE_REDUCTION# PGPT	PGPT0000310-napA-K02567	0	0	1	0
PGPT0000315	DIRECT_EFFECTS	BIO-FERTILIZATION	NITROGEN_ACQUISITION	N-AQUISITION-DENITRIFICATION|NITRATE_USAGE	DENITRIFICATION-NITRATE_REDUCTION# PGPT	PGPT0000315-napB-K02568	0	0	1	0
PGPT0000320	DIRECT_EFFECTS	BIO-FERTILIZATION	NITROGEN_ACQUISITION	N-AQUISITION-DENITRIFICATION|NITRATE_USAGE	DENITRIFICATION-NITRATE_REDUCTION	PGPT0000320-napC-K02569	0	0	1	0
PGPT0000325	DIRECT_EFFECTS	BIO-FERTILIZATION	NITROGEN_ACQUISITION	N-AQUISITION-DENITRIFICATION|NITRATE_USAGE	DENITRIFICATION-NITRATE_REDUCTION	PGPT0000325-napD-K02570	0	0	1	0
PGPT0000330	DIRECT_EFFECTS	BIO-FERTILIZATION	NITROGEN_ACQUISITION	N-AQUISITION-DENITRIFICATION|NITRATE_USAGE	DENITRIFICATION-NITRATE_REDUCTION	PGPT0000330-napE-K02571	0	0	1	0
PGPT0000335	DIRECT_EFFECTS	BIO-FERTILIZATION	NITROGEN_ACQUISITION	N-AQUISITION-DENITRIFICATION|NITRATE_USAGE	DENITRIFICATION-NITRATE_REDUCTION	PGPT0000335-napF-K02572	0	0	1	0
PGPT0000370	DIRECT_EFFECTS	BIO-FERTILIZATION	NITROGEN_ACQUISITION	N-AQUISITION-DENITRIFICATION|NITRATE_USAGE	DENITRIFICATION-NITRATE_REDUCTION	PGPT0000370-norQ-K04748	1	1	1	0
PGPT0000375	DIRECT_EFFECTS	BIO-FERTILIZATION	NITROGEN_ACQUISITION	N-AQUISITION-DENITRIFICATION|NITRATE_USAGE	DENITRIFICATION-NITRATE_REDUCTION# PGPT	PGPT0000375-norR-K12266	0	0	0	2
PGPT0000380	DIRECT_EFFECTS	BIO-FERTILIZATION	NITROGEN_ACQUISITION	N-AQUISITION-DENITRIFICATION|NITRATE_USAGE	DENITRIFICATION-NITRATE_REDUCTION# PGPT	PGPT0000380-norV-K12264	0	0	0	3
PGPT0000385	DIRECT_EFFECTS	BIO-FERTILIZATION	NITROGEN_ACQUISITION	N-AQUISITION-DENITRIFICATION|NITRATE_USAGE	DENITRIFICATION-NITRATE_REDUCTION# PGPT	PGPT0000385-norW-K12265	0	0	0	1
PGPT0000390	DIRECT_EFFECTS	BIO-FERTILIZATION	NITROGEN_ACQUISITION	N-AQUISITION-DENITRIFICATION|NITRATE_USAGE	DENITRIFICATION-NITRATE_REDUCTION# PGPT	PGPT0000390-nasA|nasC|narB-K00372	0	2	0	1
PGPT0000400	DIRECT_EFFECTS	BIO-FERTILIZATION	NITROGEN_ACQUISITION	N-AQUISITION-DENITRIFICATION|NITRATE_USAGE	DENITRIFICATION-NITRATE_REDUCTION	PGPT0000400-nasR|nasT-K07183	0	1	0	0
PGPT0000415	DIRECT_EFFECTS	BIO-FERTILIZATION	NITROGEN_ACQUISITION	N-AQUISITION-DENITRIFICATION|NITRATE_USAGE	DENITRIFICATION-NITRATE_REDUCTION	PGPT0000415-nosF-K19340	0	0	1	0
PGPT0000430	DIRECT_EFFECTS	BIO-FERTILIZATION	NITROGEN_ACQUISITION	N-AQUISITION-DENITRIFICATION|NITRATE_USAGE	DENITRIFICATION-NITRATE_REDUCTION# PGPT	PGPT0000430-nosX|apbE|yojL|fmnB-K03734	0	2	0	3
PGPT0000445	DIRECT_EFFECTS	BIO-FERTILIZATION	NITROGEN_ACQUISITION	N-AQUISITION-DENITRIFICATION|NITRATE_USAGE	DENITRIFICATION-NITRATE_REDUCTION	PGPT0000445-nirA-K00366	1	0	0	0
PGPT0000450	DIRECT_EFFECTS	BIO-FERTILIZATION	NITROGEN_ACQUISITION	N-AQUISITION-DENITRIFICATION|NITRATE_USAGE	DENITRIFICATION-NITRATE_REDUCTION	PGPT0000450-nirB-K00362	0	2	0	5
PGPT0000455	DIRECT_EFFECTS	BIO-FERTILIZATION	NITROGEN_ACQUISITION	N-AQUISITION-DENITRIFICATION|NITRATE_USAGE	DENITRIFICATION-NITRATE_REDUCTION	PGPT0000455-nirD-K00363	0	1	0	2
PGPT0000471	DIRECT_EFFECTS	BIO-FERTILIZATION	NITROGEN_ACQUISITION	N-AQUISITION-DENITRIFICATION|NITRATE_USAGE	DENITRIFICATION-NITRATE_REDUCTION	PGPT0000471-nirV-NA	0	1	0	0
PGPT0000483	DIRECT_EFFECTS	BIO-FERTILIZATION	NITROGEN_ACQUISITION	N-AQUISITION-DENITRIFICATION|NITRATE_USAGE	DENITRIFICATION-NITRATE_REDUCTION	PGPT0000483-nrfD-K04015	1	0	0	0
PGPT0000484	DIRECT_EFFECTS	BIO-FERTILIZATION	NITROGEN_ACQUISITION	N-AQUISITION-DENITRIFICATION|NITRATE_USAGE	DENITRIFICATION-NITRATE_REDUCTION	PGPT0000484-nrfE-K04016	0	0	1	0
PGPT0000500	DIRECT_EFFECTS	BIO-FERTILIZATION	NITROGEN_ACQUISITION	N-AQUISITION-DENITRIFICATION|NITRATE_USAGE	DENITRIFICATION-NITRATE_REDUCTION# PGPT	PGPT0000500-narH|narY|nxrB-K00371	1	0	0	2
PGPT0000505	DIRECT_EFFECTS	BIO-FERTILIZATION	NITROGEN_ACQUISITION	N-AQUISITION-DENITRIFICATION|NITRATE_USAGE	DENITRIFICATION-NITRATE_REDUCTION# PGPT	PGPT0000505-narI|narV-K00374	1	0	0	1
PGPT0000510	DIRECT_EFFECTS	BIO-FERTILIZATION	NITROGEN_ACQUISITION	N-AQUISITION-DENITRIFICATION|NITRATE_USAGE	DENITRIFICATION-NITRATE_REDUCTION	PGPT0000510-narJ|narW-K00373	1	0	0	2
PGPT0000515	DIRECT_EFFECTS	BIO-FERTILIZATION	NITROGEN_ACQUISITION	N-AQUISITION-DENITRIFICATION|NITRATE_USAGE	DENITRIFICATION-NITRATE|NITRITE_SENSING# PGPT	PGPT0000515-fnr-K01420	0	0	2	0
PGPT0000520	DIRECT_EFFECTS	BIO-FERTILIZATION	NITROGEN_ACQUISITION	N-AQUISITION-REGULATION	N-ACQUISITION-MOLYBDENUM-COREGULATION# PGPT	PGPT0000520-modE-K02019	1	1	1	1
PGPT0000525	DIRECT_EFFECTS	BIO-FERTILIZATION	NITROGEN_ACQUISITION	N-AQUISITION-DENITRIFICATION|NITRATE_USAGE	DENITRIFICATION-NITRATE|NITRITE_SENSING	PGPT0000525-nreB-K07683	0	0	0	1
PGPT0000540	DIRECT_EFFECTS	BIO-FERTILIZATION	NITROGEN_ACQUISITION	N-AQUISITION-DENITRIFICATION|NITRATE_USAGE	DENITRIFICATION-NITRATE|NITRITE_SENSING# PGPT	PGPT0000540-regA|regR|actR-K15012	0	1	1	0
PGPT0000545	DIRECT_EFFECTS	BIO-FERTILIZATION	NITROGEN_ACQUISITION	N-AQUISITION-DENITRIFICATION|NITRATE_USAGE	DENITRIFICATION-NITRATE|NITRITE_SENSING# PGPT	PGPT0000545-regB|regS|actS-K15011	0	1	1	0
PGPT0000550	DIRECT_EFFECTS	BIO-FERTILIZATION	NITROGEN_ACQUISITION	N-AQUISITION-DENITRIFICATION|NITRATE_USAGE	DENITRIFICATION-NITRATE|NITRITE_SENSING# PGPT	PGPT0000550-narL-K07684	6	6	1	1
PGPT0000575	DIRECT_EFFECTS	BIO-FERTILIZATION	NITROGEN_ACQUISITION	N-AQUISITION-DENITRIFICATION|NITRATE_USAGE	DENITRIFICATION-NITRTATE|NITRITE_TRANSPORT	PGPT0000575-nasD|nrtC-K15578	0	1	0	1
PGPT0000580	DIRECT_EFFECTS	BIO-FERTILIZATION	NITROGEN_ACQUISITION	N-AQUISITION-DENITRIFICATION|NITRATE_USAGE	DENITRIFICATION-NITRTATE|NITRITE_TRANSPORT	PGPT0000580-nasE|nrtB|cynB-K15577	0	1	0	1
PGPT0000585	DIRECT_EFFECTS	BIO-FERTILIZATION	NITROGEN_ACQUISITION	N-AQUISITION-DENITRIFICATION|NITRATE_USAGE	DENITRIFICATION-NITRTATE|NITRITE_TRANSPORT	PGPT0000585-nasF|nrtA|cynA-K15576	0	1	0	1
PGPT0000605	DIRECT_EFFECTS	BIO-FERTILIZATION	NITROGEN_ACQUISITION	N-AQUISITION-ETHANOLAMINE_USAGE	N-AQUISITION-ETHANOLAMINE_DEGRADATION# PGPT	PGPT0000605-eutB-K03735	0	1	0	0
PGPT0000610	DIRECT_EFFECTS	BIO-FERTILIZATION	NITROGEN_ACQUISITION	N-AQUISITION-ETHANOLAMINE_USAGE	N-AQUISITION-ETHANOLAMINE_DEGRADATION# PGPT	PGPT0000610-eutC-K03736	0	1	0	0
PGPT0000613	DIRECT_EFFECTS	BIO-FERTILIZATION	NITROGEN_ACQUISITION	N-AQUISITION-ETHANOLAMINE_USAGE	N-AQUISITION-ETHANOLAMINE_DEGRADATION	PGPT0000613-eutJ-K04024	0	0	1	0
PGPT0000615	DIRECT_EFFECTS	BIO-FERTILIZATION	NITROGEN_ACQUISITION	N-AQUISITION-CYNATE_USAGE	N-AQUISITION-CYNATE_DEGRADATION# PGPT	PGPT0000615-cynS-K01725	0	1	0	0
PGPT0000623	DIRECT_EFFECTS	BIO-FERTILIZATION	NITROGEN_ACQUISITION	N-AQUISITION-ETHANOLAMINE_USAGE	N-AQUISITION-ETHANOLAMINE_DEGRADATION	PGPT0000623-eutR|yfeG-K04033	0	1	0	0
PGPT0000630	DIRECT_EFFECTS	BIO-FERTILIZATION	NITROGEN_ACQUISITION	N-AQUISITION-HYDROXYLAMINE_USAGE	N-AQUISITION-HYDROXYLAMINE_DEGRADATION# PGPT	PGPT0000630-hcp-K05601	0	0	0	1
PGPT0000635	DIRECT_EFFECTS	BIO-FERTILIZATION	NITROGEN_ACQUISITION	N-AQUISITION-AMMONIUM_ASSIMILATION|USAGE	N-AQUISITION-GLUTAMATE|GLUTAMINE_METABOLISM# PGPT	PGPT0000635-gltB-K00265	2	1	2	4
PGPT0000640	DIRECT_EFFECTS	BIO-FERTILIZATION	NITROGEN_ACQUISITION	N-AQUISITION-AMMONIUM_ASSIMILATION|USAGE	N-AQUISITION-GLUTAMATE|GLUTAMINE_METABOLISM# PGPT	PGPT0000640-gltD-K00266	1	1	1	1
PGPT0000645	DIRECT_EFFECTS	BIO-FERTILIZATION	NITROGEN_ACQUISITION	N-AQUISITION-AMMONIUM_ASSIMILATION|USAGE	N-AQUISITION-GLUTAMATE|GLUTAMINE_METABOLISM# PGPT	PGPT0000645-glnA-K01915	3	0	1	2
PGPT0000650	DIRECT_EFFECTS	BIO-FERTILIZATION	NITROGEN_ACQUISITION	N-AQUISITION-AMMONIUM_ASSIMILATION|USAGE	N-AQUISITION-GLUTAMATE|GLUTAMINE_METABOLISM# PGPT	PGPT0000650-glnB|glnY-K04751	2	1	1	0
PGPT0000655	DIRECT_EFFECTS	BIO-FERTILIZATION	NITROGEN_ACQUISITION	N-AQUISITION-AMMONIUM_ASSIMILATION|USAGE	N-AQUISITION-GLUTAMATE|GLUTAMINE_METABOLISM# PGPT	PGPT0000655-glnE-K00982	1	1	1	2
PGPT0000660	DIRECT_EFFECTS	BIO-FERTILIZATION	NITROGEN_ACQUISITION	N-AQUISITION-AMMONIUM_ASSIMILATION|USAGE	N-AQUISITION-GLUTAMATE|GLUTAMINE_METABOLISM# PGPT	PGPT0000660-glnD-K00990	3	2	1	2
PGPT0000665	DIRECT_EFFECTS	BIO-FERTILIZATION	NITROGEN_ACQUISITION	N-AQUISITION-AMMONIUM_ASSIMILATION|USAGE	N-AQUISITION-GLUTAMATE|GLUTAMINE_METABOLISM# PGPT	PGPT0000665-glnH-K10036	0	0	0	2
PGPT0000675	DIRECT_EFFECTS	BIO-FERTILIZATION	NITROGEN_ACQUISITION	N-AQUISITION-AMMONIUM_ASSIMILATION|USAGE	N-AQUISITION-GLUTAMATE|GLUTAMINE_METABOLISM# PGPT	PGPT0000675-glnK|glnZ-K04752	0	1	1	1
PGPT0000680	DIRECT_EFFECTS	BIO-FERTILIZATION	NITROGEN_ACQUISITION	N-AQUISITION-AMMONIUM_ASSIMILATION|USAGE	N-AQUISITION-GLUTAMATE|GLUTAMINE_METABOLISM# PGPT	PGPT0000680-ntrB|glnL-K07708	0	1	1	2
PGPT0000685	DIRECT_EFFECTS	BIO-FERTILIZATION	NITROGEN_ACQUISITION	N-AQUISITION-AMMONIUM_ASSIMILATION|USAGE	N-AQUISITION-GLUTAMATE|GLUTAMINE_METABOLISM# PGPT	PGPT0000685-ntrC|glnG-K07712	0	1	1	1
PGPT0000690	DIRECT_EFFECTS	BIO-FERTILIZATION	NITROGEN_ACQUISITION	N-AQUISITION-AMMONIUM_ASSIMILATION|USAGE	N-AQUISITION-GLUTAMATE|GLUTAMINE_METABOLISM# PGPT	PGPT0000690-gdhA-K00262	0	0	0	2
PGPT0000695	DIRECT_EFFECTS	BIO-FERTILIZATION	NITROGEN_ACQUISITION	N-AQUISITION-AMMONIUM_ASSIMILATION|USAGE	N-AQUISITION-GLUTAMATE|GLUTAMINE_METABOLISM# PGPT	PGPT0000695-gdhA-K00261	1	1	0	0
PGPT0000700	DIRECT_EFFECTS	BIO-FERTILIZATION	NITROGEN_ACQUISITION	N-AQUISITION-AMMONIUM_ASSIMILATION|USAGE	N-AQUISITION-GLUTAMATE|GLUTAMINE_METABOLISM# PGPT	PGPT0000700-aspQ|asnA|asnB-K05597	0	1	0	0
PGPT0000709	INDIRECT_EFFECTS	COLONIZING_PLANT_SYSTEM	COLONIZATION-PLANT_DERIVED_SUBSTRATE_USAGE	PLANT_DERIVED_AMINO_ACID_TRANSPORT	PLANT_DERIVED_ASPARTATE_TRANSPORT# PGPT	PGPT0000709-aspT|ybjL|yidE-K07085	0	3	0	4
PGPT0000725	DIRECT_EFFECTS	BIO-FERTILIZATION	NITROGEN_ACQUISITION	N-AQUISITION-AMMONIUM_ASSIMILATION|USAGE	N-AQUISITION-GLUTAMINE_TRANSPORT# PGPT	PGPT0000725-glnP-K10037	0	0	0	2
PGPT0000730	DIRECT_EFFECTS	BIO-FERTILIZATION	NITROGEN_ACQUISITION	N-AQUISITION-AMMONIUM_ASSIMILATION|USAGE	N-AQUISITION-GLUTAMINE_TRANSPORT# PGPT	PGPT0000730-glnQ-K10038	0	0	0	1
PGPT0000750	DIRECT_EFFECTS	BIO-FERTILIZATION	NITROGEN_ACQUISITION	N-AQUISITION-AMMONIUM_ASSIMILATION|USAGE	N-AQUISITION-GLUTAMATE_TRANSPORT# PGPT	PGPT0000750-gltI|aatJ-K10001	0	6	0	1
PGPT0000755	DIRECT_EFFECTS	BIO-FERTILIZATION	NITROGEN_ACQUISITION	N-AQUISITION-AMMONIUM_ASSIMILATION|USAGE	N-AQUISITION-GLUTAMATE_TRANSPORT# PGPT	PGPT0000755-gltK|aatM-K10002	0	1	0	2
PGPT0000760	DIRECT_EFFECTS	BIO-FERTILIZATION	NITROGEN_ACQUISITION	N-AQUISITION-AMMONIUM_ASSIMILATION|USAGE	N-AQUISITION-GLUTAMATE_TRANSPORT# PGPT	PGPT0000760-gltJ|aatQ-K10003	0	1	0	2
PGPT0000765	DIRECT_EFFECTS	BIO-FERTILIZATION	NITROGEN_ACQUISITION	N-AQUISITION-AMMONIUM_ASSIMILATION|USAGE	N-AQUISITION-GLUTAMATE_TRANSPORT# PGPT	PGPT0000765-gltL|aatP-K10004	0	1	0	2
PGPT0000770	DIRECT_EFFECTS	BIO-FERTILIZATION	NITROGEN_ACQUISITION	N-AQUISITION-AMMONIUM_ASSIMILATION|USAGE	N-AQUISITION-GLUTAMATE_TRANSPORT# PGPT	PGPT0000770-gluB-K10005	1	0	0	0
PGPT0000775	DIRECT_EFFECTS	BIO-FERTILIZATION	NITROGEN_ACQUISITION	N-AQUISITION-AMMONIUM_ASSIMILATION|USAGE	N-AQUISITION-GLUTAMATE_TRANSPORT# PGPT	PGPT0000775-gluC-K10006	1	0	0	0
PGPT0000780	DIRECT_EFFECTS	BIO-FERTILIZATION	NITROGEN_ACQUISITION	N-AQUISITION-AMMONIUM_ASSIMILATION|USAGE	N-AQUISITION-GLUTAMATE_TRANSPORT# PGPT	PGPT0000780-gluD-K10007	1	0	0	0
PGPT0000785	DIRECT_EFFECTS	BIO-FERTILIZATION	NITROGEN_ACQUISITION	N-AQUISITION-AMMONIUM_ASSIMILATION|USAGE	N-AQUISITION-GLUTAMATE_TRANSPORT# PGPT	PGPT0000785-gluA-K10008	1	0	0	0
PGPT0000790	DIRECT_EFFECTS	BIO-FERTILIZATION	NITROGEN_ACQUISITION	N-AQUISITION-AMMONIUM_ASSIMILATION|USAGE	N-AQUISITION-GLUTAMATE_TRANSPORT# PGPT	PGPT0000790-aauS-K17060	0	1	0	0
PGPT0000795	DIRECT_EFFECTS	BIO-FERTILIZATION	NITROGEN_ACQUISITION	N-AQUISITION-AMMONIUM_ASSIMILATION|USAGE	N-AQUISITION-GLUTAMATE_TRANSPORT# PGPT	PGPT0000795-ntrA|rpoN-K03092	0	1	1	2
PGPT0000800	DIRECT_EFFECTS	BIO-FERTILIZATION	NITROGEN_ACQUISITION	N-AQUISITION-AMMONIUM_ASSIMILATION|USAGE	N-AQUISITION-GLUTAMATE_TRANSPORT# PGPT	PGPT0000800-aauR-K17061	0	1	0	0
PGPT0000805	DIRECT_EFFECTS	BIO-FERTILIZATION	NITROGEN_ACQUISITION	N-AQUISITION-AMMONIUM_ASSIMILATION|USAGE	N-AQUISITION-GLUTAMATE_TRANSPORT	PGPT0000805-gltP|gltT-K11102	0	2	1	5
PGPT0000810	DIRECT_EFFECTS	BIO-FERTILIZATION	NITROGEN_ACQUISITION	N-AQUISITION-AMMONIUM_ASSIMILATION|USAGE	N-AQUISITION-GLUTAMATE_TRANSPORT# PGPT	PGPT0000810-gltS-K03312	0	1	0	1
PGPT0000815	DIRECT_EFFECTS	BIO-FERTILIZATION	NITROGEN_ACQUISITION	N-AQUISITION-AMMONIUM_ASSIMILATION|USAGE	N-AQUISITION-GLUTAMATE_TRANSPORT# PGPT	PGPT0000815-TC_AAT|yifK-K03293	0	0	0	2
PGPT0000835	DIRECT_EFFECTS	BIO-FERTILIZATION	NITROGEN_ACQUISITION	N-AQUISITION-AMMONIUM_ASSIMILATION|USAGE	N-AQUISITION-AMMONIUM_METABOLISM# PGPT	PGPT0000835-nitA|nitB|nitR|nit1-K01501	0	1	0	0
PGPT0000840	DIRECT_EFFECTS	BIO-FERTILIZATION	NITROGEN_ACQUISITION	N-AQUISITION-AMMONIUM_ASSIMILATION|USAGE	N-AQUISITION-AMMONIUM_TRANSPORT	PGPT0000840-amtB|ybaG|amt-K03320	1	2	2	1
PGPT0000850	DIRECT_EFFECTS	BIO-FERTILIZATION	NITROGEN_ACQUISITION	N-AQUISITION-AMMONIUM_ASSIMILATION|USAGE	N-AQUISITION-AMMONIUM_STARVATiON_RESPONSE# PGPT	PGPT0000850-exoS|chvG-K14980	0	0	1	0
PGPT0000855	DIRECT_EFFECTS	BIO-FERTILIZATION	NITROGEN_ACQUISITION	N-AQUISITION-AMMONIUM_ASSIMILATION|USAGE	N-AQUISITION-AMMONIUM_STARVATiON_RESPONSE# PGPT	PGPT0000855-exoR-K07126	0	5	6	2
PGPT0000860	DIRECT_EFFECTS	BIO-FERTILIZATION	NITROGEN_ACQUISITION	N-AQUISITION-ALLANTOIN_USAGE	N-AQUISITION-ALLANTOIN_METABOLISM	PGPT0000860-allR-K10973	0	2	0	1
PGPT0000870	DIRECT_EFFECTS	BIO-FERTILIZATION	NITROGEN_ACQUISITION	N-AQUISITION-ALLANTOIN_USAGE	N-AQUISITION-ALLANTOIN_METABOLISM# PGPT	PGPT0000870-allB-K01466	0	0	1	0
PGPT0000875	DIRECT_EFFECTS	BIO-FERTILIZATION	NITROGEN_ACQUISITION	N-AQUISITION-ALLANTOIN_USAGE	N-AQUISITION-ALLANTOIN_METABOLISM# PGPT	PGPT0000875-allC-K02083	0	2	1	0
PGPT0000885	DIRECT_EFFECTS	BIO-FERTILIZATION	NITROGEN_ACQUISITION	N-AQUISITION-ALLANTOIN_USAGE	N-AQUISITION-ALLANTOIN_METABOLISM# PGPT	PGPT0000885-hpxB-K16842	0	1	0	0
PGPT0000895	DIRECT_EFFECTS	BIO-FERTILIZATION	NITROGEN_ACQUISITION	N-AQUISITION-ALLANTOIN_USAGE	N-AQUISITION-ALLANTOIN_METABOLISM# PGPT	PGPT0000895-hpxA-K16841	0	0	2	0
PGPT0000900	DIRECT_EFFECTS	BIO-FERTILIZATION	NITROGEN_ACQUISITION	N-AQUISITION-TRIGONELLINE_USAGE	N-AQUISITION-TRIGONELLINE_METABOLISM# PGPT	PGPT0000900-tgnR-K23466	0	7	4	0
PGPT0000905	DIRECT_EFFECTS	BIO-FERTILIZATION	NITROGEN_ACQUISITION	N-AQUISITION-TRIGONELLINE_USAGE	N-AQUISITION-TRIGONELLINE_METABOLISM# PGPT	PGPT0000905-tgnA-K23462	1	0	0	0
PGPT0000910	DIRECT_EFFECTS	BIO-FERTILIZATION	NITROGEN_ACQUISITION	N-AQUISITION-TRIGONELLINE_USAGE	N-AQUISITION-TRIGONELLINE_METABOLISM# PGPT	PGPT0000910-tgnB-K23464	3	0	1	0
PGPT0000925	DIRECT_EFFECTS	BIO-FERTILIZATION	NITROGEN_ACQUISITION	N-AQUISITION-UREA_USAGE	N-AQUISITION-UREA_TRANSPORT	PGPT0000925-urtA-K11959	1	1	1	0
PGPT0000930	DIRECT_EFFECTS	BIO-FERTILIZATION	NITROGEN_ACQUISITION	N-AQUISITION-UREA_USAGE	N-AQUISITION-UREA_TRANSPORT# PGPT	PGPT0000930-urtB-K11960	0	1	1	0
PGPT0000935	DIRECT_EFFECTS	BIO-FERTILIZATION	NITROGEN_ACQUISITION	N-AQUISITION-UREA_USAGE	N-AQUISITION-UREA_TRANSPORT	PGPT0000935-urtC-K11961	0	1	1	0
PGPT0000940	DIRECT_EFFECTS	BIO-FERTILIZATION	NITROGEN_ACQUISITION	N-AQUISITION-UREA_USAGE	N-AQUISITION-UREA_TRANSPORT	PGPT0000940-urtD-K11962	0	1	1	0
PGPT0000945	DIRECT_EFFECTS	BIO-FERTILIZATION	NITROGEN_ACQUISITION	N-AQUISITION-UREA_USAGE	N-AQUISITION-UREA_TRANSPORT	PGPT0000945-urtE-K11963	0	1	1	1
PGPT0000955	DIRECT_EFFECTS	BIO-FERTILIZATION	NITROGEN_ACQUISITION	N-AQUISITION-UREA_USAGE	N-AQUISITION-UREA_METABOLISM# PGPT	PGPT0000955-ureA-K01430	0	1	1	2
PGPT0000960	DIRECT_EFFECTS	BIO-FERTILIZATION	NITROGEN_ACQUISITION	N-AQUISITION-UREA_USAGE	N-AQUISITION-UREA_METABOLISM# PGPT	PGPT0000960-ureB-K01429	0	1	1	1
PGPT0000965	DIRECT_EFFECTS	BIO-FERTILIZATION	NITROGEN_ACQUISITION	N-AQUISITION-UREA_USAGE	N-AQUISITION-UREA_METABOLISM# PGPT	PGPT0000965-ureC-K01428	0	1	1	1
PGPT0000970	DIRECT_EFFECTS	BIO-FERTILIZATION	NITROGEN_ACQUISITION	N-AQUISITION-UREA_USAGE	N-AQUISITION-UREA_METABOLISM	PGPT0000970-ureD-K03190	0	1	1	1
PGPT0000975	DIRECT_EFFECTS	BIO-FERTILIZATION	NITROGEN_ACQUISITION	N-AQUISITION-UREA_USAGE	N-AQUISITION-UREA_METABOLISM	PGPT0000975-ureE-K03187	0	1	1	1
PGPT0000980	DIRECT_EFFECTS	BIO-FERTILIZATION	NITROGEN_ACQUISITION	N-AQUISITION-UREA_USAGE	N-AQUISITION-UREA_METABOLISM	PGPT0000980-ureF-K03188	0	1	2	2
PGPT0000985	DIRECT_EFFECTS	BIO-FERTILIZATION	NITROGEN_ACQUISITION	N-AQUISITION-UREA_USAGE	N-AQUISITION-UREA_METABOLISM	PGPT0000985-ureG-K03189	1	1	2	3
PGPT0000995	DIRECT_EFFECTS	BIO-FERTILIZATION	NITROGEN_ACQUISITION	N-AQUISITION-UREA_USAGE	N-AQUISITION-UREA_METABOLISM	PGPT0000995-ureJ-K03192	0	1	1	2
PGPT0001005	DIRECT_EFFECTS	BIO-FERTILIZATION	NITROGEN_ACQUISITION	N-AQUISITION-UREA_USAGE	N-AQUISITION-UREA_METABOLISM	PGPT0001005-uca|dur|urd-K01941	1	0	0	0
PGPT0001010	DIRECT_EFFECTS	BIO-FERTILIZATION	NITROGEN_ACQUISITION	N-AQUISITION-UREA_USAGE	N-AQUISITION-UREA_METABOLISM# PGPT	PGPT0001010-atzF-K01457	2	1	1	1
PGPT0001020	DIRECT_EFFECTS	BIO-FERTILIZATION	NITROGEN_ACQUISITION	N-AQUISITION-REGULATION	NTR-NITROGEN_REGULATORY_SYSTEM	PGPT0001020-ntrX-K13599	0	1	2	0
PGPT0001025	DIRECT_EFFECTS	BIO-FERTILIZATION	NITROGEN_ACQUISITION	N-AQUISITION-REGULATION	NTR-NITROGEN_REGULATORY_SYSTEM	PGPT0001025-ntrY-K13598	0	1	1	0
PGPT0001030	DIRECT_EFFECTS	BIO-FERTILIZATION	NITROGEN_ACQUISITION	N-AQUISITION-REGULATION	NITROGEN_REGULATING_FUNCTIONS# PGPT	PGPT0001030-acoR-K21405	0	3	1	2
PGPT0001035	DIRECT_EFFECTS	BIO-FERTILIZATION	NITROGEN_ACQUISITION	N-AQUISITION-REGULATION	NITROGEN_REGULATING_FUNCTIONS	PGPT0001035-fixA|etfB-K03521	2	1	1	0
PGPT0001040	DIRECT_EFFECTS	BIO-FERTILIZATION	NITROGEN_ACQUISITION	N-AQUISITION-REGULATION	NITROGEN_REGULATING_FUNCTIONS	PGPT0001040-fixB|etfA-K03522	1	1	1	0
PGPT0001045	DIRECT_EFFECTS	BIO-FERTILIZATION	NITROGEN_ACQUISITION	N-AQUISITION-REGULATION	NITROGEN_REGULATING_FUNCTIONS# PGPT	PGPT0001045-fixC-K00313	0	1	1	0
PGPT0001055	DIRECT_EFFECTS	BIO-FERTILIZATION	NITROGEN_ACQUISITION	N-AQUISITION-ATMOSHPHERIC_NITROGEN_FIXATION	CBB3-TYPE_CYTOCHROME_C_OXIDASE# PGPT	PGPT0001055-fixN|ccoN-K00404	0	1	1	0
PGPT0001065	DIRECT_EFFECTS	BIO-FERTILIZATION	NITROGEN_ACQUISITION	N-AQUISITION-REGULATION	NITROGEN_REGULATING_FUNCTIONS	PGPT0001065-draG-K05521	0	0	0	1
PGPT0001100	DIRECT_EFFECTS	BIO-FERTILIZATION	NITROGEN_ACQUISITION	N-AQUISITION-REGULATION	FUMARATE_BASED_NITROGENASE_REGULATION	PGPT0001100-fdnG-K08348	0	0	0	4
PGPT0001105	DIRECT_EFFECTS	BIO-FERTILIZATION	NITROGEN_ACQUISITION	N-AQUISITION-REGULATION	FUMARATE_BASED_NITROGENASE_REGULATION	PGPT0001105-fdnH-K08349	0	0	0	1
PGPT0001115	DIRECT_EFFECTS	BIO-FERTILIZATION	NITROGEN_ACQUISITION	N-AQUISITION-REGULATION	FUMARATE_BASED_NITROGENASE_REGULATION# PGPT	PGPT0001115-frdA-K00244	0	1	0	4
PGPT0001120	DIRECT_EFFECTS	BIO-FERTILIZATION	NITROGEN_ACQUISITION	N-AQUISITION-REGULATION	FUMARATE_BASED_NITROGENASE_REGULATION# PGPT	PGPT0001120-frdB-K00245	0	0	0	1
PGPT0001125	DIRECT_EFFECTS	BIO-FERTILIZATION	NITROGEN_ACQUISITION	N-AQUISITION-REGULATION	FUMARATE_BASED_NITROGENASE_REGULATION# PGPT	PGPT0001125-frdC-K00246	0	0	0	1
PGPT0001135	DIRECT_EFFECTS	BIO-FERTILIZATION	NITROGEN_ACQUISITION	N-AQUISITION-RELATED_FUNCTIONS	N-AQUISITION-NitT|TauT_FAMILY_TRANSPORTER	PGPT0001135-ABC_SN_S-K02051	3	9	8	0
PGPT0001140	DIRECT_EFFECTS	BIO-FERTILIZATION	NITROGEN_ACQUISITION	N-AQUISITION-RELATED_FUNCTIONS	N-AQUISITION-NitT|TauT_FAMILY_TRANSPORTER	PGPT0001140-ABC_SN_A|ytlC-K02049	2	9	8	0
PGPT0001145	DIRECT_EFFECTS	BIO-FERTILIZATION	NITROGEN_ACQUISITION	N-AQUISITION-RELATED_FUNCTIONS	N-AQUISITION-NitT|TauT_FAMILY_TRANSPORTER	PGPT0001145-ABC_SN_P-K02050	2	9	5	0
PGPT0001150	DIRECT_EFFECTS	BIO-FERTILIZATION	CARBON_DIOXID_FIXATION	CO2_FIXATION-RuBisCo	CO2_FIXATION-RuBisCo_BIOSYNTHESIS# PGPT	PGPT0001150-rbcL|cbbL-K01601	0	0	2	0
PGPT0001160	DIRECT_EFFECTS	BIO-FERTILIZATION	CARBON_DIOXID_FIXATION	CO2_FIXATION-RuBisCo	CO2_FIXATION-RuBisCo_BIOSYNTHESIS_REGULATION	PGPT0001160-cbbR|cmpR|ndhR-K21703	0	15	5	4
PGPT0001165	DIRECT_EFFECTS	BIO-FERTILIZATION	CARBON_DIOXID_FIXATION	CO2_FIXATION-ALTERNATIVE_PAHTWAYS	CO2_FIXATION-PHOSPHOENOLPYRUVATE_CARBOXYLASE_BIOSYNTHESIS	PGPT0001165-ppc-K01595	0	1	0	2
PGPT0001170	DIRECT_EFFECTS	BIO-FERTILIZATION	CARBON_DIOXID_FIXATION	CO2_FIXATION-ALTERNATIVE_PAHTWAYS	CO2_FIXATION-REDUCTIVE_CITRIC_ACID_CYCLE# PGPT	PGPT0001170-icd-K00031	2	2	1	1
PGPT0001175	DIRECT_EFFECTS	BIO-FERTILIZATION	CARBON_DIOXID_FIXATION	CO2_FIXATION-ALTERNATIVE_PAHTWAYS	CO2_FIXATION-REDUCTIVE_CITRIC_ACID_CYCLE# PGPT	PGPT0001175-korA|oorA|oforA-K00174	1	0	0	0
PGPT0001180	DIRECT_EFFECTS	BIO-FERTILIZATION	CARBON_DIOXID_FIXATION	CO2_FIXATION-ALTERNATIVE_PAHTWAYS	CO2_FIXATION-REDUCTIVE_CITRIC_ACID_CYCLE# PGPT	PGPT0001180-korB|oorB|oforB-K00175	1	0	0	0
PGPT0001255	DIRECT_EFFECTS	BIO-FERTILIZATION	PHOSPHATE_SOLUBILIZATION	P-SOLUBILISATION-ORGANIC_ACID_METABOLISM	P-SOLUBILISATION-GLUCONIC_ACID-PQQ_PATHWAY# PGPT	PGPT0001255-pqqC-K06137	0	1	0	0
PGPT0001270	DIRECT_EFFECTS	BIO-FERTILIZATION	PHOSPHATE_SOLUBILIZATION	P-SOLUBILISATION-ORGANIC_ACID_METABOLISM	P-SOLUBILISATION-GLUCONIC_ACID-PQQ_PATHWAY# PGPT	PGPT0001270-pqqF-K01407	0	0	0	1
PGPT0001280	DIRECT_EFFECTS	BIO-FERTILIZATION	PHOSPHATE_SOLUBILIZATION	P-SOLUBILISATION-ORGANIC_ACID_METABOLISM	P-SOLUBILISATION-GLUCONIC_ACID-PQQ_PATHWAY# PGPT	PGPT0001280-pqqL|yddC-K07263	1	3	3	1
PGPT0001285	DIRECT_EFFECTS	BIO-FERTILIZATION	PHOSPHATE_SOLUBILIZATION	P-SOLUBILISATION-ORGANIC_ACID_METABOLISM	P-SOLUBILISATION_D_GLUCONATE_BIOSYNTHESIS# PGPT	PGPT0001285-gnl-K01053	0	1	1	0
PGPT0001290	DIRECT_EFFECTS	BIO-FERTILIZATION	PHOSPHATE_SOLUBILIZATION	P-SOLUBILISATION-ORGANIC_ACID_METABOLISM	P-SOLUBILISATION_D_GLUCONATE_BIOSYNTHESIS# PGPT	PGPT0001290-gcd|gdhAB-K00117	0	1	0	2
PGPT0001310	DIRECT_EFFECTS	BIO-FERTILIZATION	PHOSPHATE_SOLUBILIZATION	P-SOLUBILISATION-ORGANIC_ACID_METABOLISM	P-SOLUBILISATION-KETO-GLUCONATE_BIOSYNTHESIS# PGPT	PGPT0001310-ghrB-K00090	0	1	1	2
PGPT0001315	DIRECT_EFFECTS	BIO-FERTILIZATION	PHOSPHATE_SOLUBILIZATION	P-SOLUBILISATION-ORGANIC_ACID_METABOLISM	P-SOLUBILISATION-KETO-GLUCONATE_BIOSYNTHESIS# PGPT	PGPT0001315-2_ketogluconate_reductase-K22229	0	2	2	0
PGPT0001320	DIRECT_EFFECTS	BIO-FERTILIZATION	PHOSPHATE_SOLUBILIZATION	P-SOLUBILISATION-ORGANIC_ACID_METABOLISM	P-SOLUBILISATION-KETO-GLUCONATE_BIOSYNTHESIS# PGPT	PGPT0001320-dkgA-K06221	2	0	0	1
PGPT0001325	DIRECT_EFFECTS	BIO-FERTILIZATION	PHOSPHATE_SOLUBILIZATION	P-SOLUBILISATION-ORGANIC_ACID_METABOLISM	P-SOLUBILISATION-KETO-GLUCONATE_BIOSYNTHESIS# PGPT	PGPT0001325-dkgB-K06222	0	1	0	0
PGPT0001330	DIRECT_EFFECTS	BIO-FERTILIZATION	PHOSPHATE_SOLUBILIZATION	P-SOLUBILISATION-ORGANIC_ACID_METABOLISM	P-SOLUBILISATION-GLUCONIC_ACID_TRANSPORT# PGPT	PGPT0001330-gntT-K06155	0	0	0	2
PGPT0001335	DIRECT_EFFECTS	BIO-FERTILIZATION	PHOSPHATE_SOLUBILIZATION	P-SOLUBILISATION-ORGANIC_ACID_METABOLISM	P-SOLUBILISATION-GLUCONIC_ACID_TRANSPORT# PGPT	PGPT0001335-gntU-K06156	0	0	0	1
PGPT0001340	DIRECT_EFFECTS	BIO-FERTILIZATION	PHOSPHATE_SOLUBILIZATION	P-SOLUBILISATION-ORGANIC_ACID_METABOLISM	P-SOLUBILISATION-GLUCONIC_ACID_TRANSPORT# PGPT	PGPT0001340-TC_GNTP-K03299	1	1	0	0
PGPT0001350	DIRECT_EFFECTS	BIO-FERTILIZATION	PHOSPHATE_SOLUBILIZATION	P-SOLUBILISATION-ORGANIC_ACID_METABOLISM	P-SOLUBILISATION-ACETIC_ACID_BIOSYNTHESIS# PGPT	PGPT0001350-maeA|sfcA|ywkA-K00027	3	2	0	1
PGPT0001360	DIRECT_EFFECTS	BIO-FERTILIZATION	PHOSPHATE_SOLUBILIZATION	P-SOLUBILISATION-ORGANIC_ACID_METABOLISM	P-SOLUBILISATION-ACETIC_ACID_BIOSYNTHESIS# PGPT	PGPT0001360-ackA-K00925	0	1	1	1
PGPT0001365	DIRECT_EFFECTS	BIO-FERTILIZATION	PHOSPHATE_SOLUBILIZATION	P-SOLUBILISATION-ORGANIC_ACID_METABOLISM	P-SOLUBILISATION-ACETIC_ACID_BIOSYNTHESIS# PGPT	PGPT0001365-pta-K00625	0	1	1	0
PGPT0001370	DIRECT_EFFECTS	BIO-FERTILIZATION	PHOSPHATE_SOLUBILIZATION	P-SOLUBILISATION-ORGANIC_ACID_METABOLISM	P-SOLUBILISATION-ACETIC_ACID_BIOSYNTHESIS# PGPT	PGPT0001370-pta-K13788	0	0	0	1
PGPT0001371	DIRECT_EFFECTS	BIO-FERTILIZATION	PHOSPHATE_SOLUBILIZATION	P-SOLUBILISATION-ORGANIC_ACID_METABOLISM	P-SOLUBILISATION-ACETIC_ACID_BIOSYNTHESIS# PGPT	PGPT0001371-poxB-K00156	2	1	0	1
PGPT0001372	DIRECT_EFFECTS	BIO-FERTILIZATION	PHOSPHATE_SOLUBILIZATION	P-SOLUBILISATION-ORGANIC_ACID_METABOLISM	P-SOLUBILISATION-ACETIC_ACID_BIOSYNTHESIS# PGPT	PGPT0001372-acyP|yccX-K01512	1	1	0	0
PGPT0001380	DIRECT_EFFECTS	BIO-FERTILIZATION	PHOSPHATE_SOLUBILIZATION	P-SOLUBILISATION-ORGANIC_ACID_METABOLISM	P-SOLUBILISATION-ACETIC_ACID_BIOSYNTHESIS# PGPT	PGPT0001380-lpd|pdhD-K00382	1	5	3	1
PGPT0001385	DIRECT_EFFECTS	BIO-FERTILIZATION	PHOSPHATE_SOLUBILIZATION	P-SOLUBILISATION-ORGANIC_ACID_METABOLISM	P-SOLUBILISATION-ACETIC_ACID_BIOSYNTHESIS# PGPT	PGPT0001385-aceE-K00163	1	3	1	2
PGPT0001390	DIRECT_EFFECTS	BIO-FERTILIZATION	PHOSPHATE_SOLUBILIZATION	P-SOLUBILISATION-ORGANIC_ACID_METABOLISM	P-SOLUBILISATION-ACETIC_ACID_BIOSYNTHESIS# PGPT	PGPT0001390-aceF|pdhC-K00627	5	3	4	3
PGPT0001400	DIRECT_EFFECTS	BIO-FERTILIZATION	PHOSPHATE_SOLUBILIZATION	P-SOLUBILISATION-ORGANIC_ACID_METABOLISM	P-SOLUBILISATION-ACETIC_ACID_TRANSPORT# PGPT	PGPT0001400-actP-K14393	0	4	0	2
PGPT0001405	DIRECT_EFFECTS	BIO-FERTILIZATION	PHOSPHATE_SOLUBILIZATION	P-SOLUBILISATION-ORGANIC_ACID_METABOLISM	P-SOLUBILISATION-OXALACETIC_ACID_BIOSYNTHESIS# PGPT	PGPT0001405-pckA-K01610	0	0	1	2
PGPT0001420	DIRECT_EFFECTS	BIO-FERTILIZATION	PHOSPHATE_SOLUBILIZATION	P-SOLUBILISATION-ORGANIC_ACID_METABOLISM	P-SOLUBILISATION-OXALACETIC_ACID_BIOSYNTHESIS# PGPT	PGPT0001420-pyc-K01958	3	0	0	0
PGPT0001435	DIRECT_EFFECTS	BIO-FERTILIZATION	PHOSPHATE_SOLUBILIZATION	P-SOLUBILISATION-ORGANIC_ACID_METABOLISM	P-SOLUBILISATION-OXALACETIC_ACID_BIOSYNTHESIS# PGPT	PGPT0001435-mdh-K00024	1	1	1	1
PGPT0001440	DIRECT_EFFECTS	BIO-FERTILIZATION	PHOSPHATE_SOLUBILIZATION	P-SOLUBILISATION-ORGANIC_ACID_METABOLISM	P-SOLUBILISATION-OXALACETIC_ACID_BIOSYNTHESIS# PGPT	PGPT0001440-mqo-K00116	1	2	1	1
PGPT0001441	INDIRECT_EFFECTS	COLONIZING_PLANT_SYSTEM	COLONIZATION-PLANT_DERIVED_SUBSTRATE_USAGE	PLANT_DERIVED_ORGANIC_ACID_UTILIZATION	PLANT_DERIVED_MALATE_UTILIZATION	PGPT0001441-leuB-K00052	1	1	1	1
PGPT0001442	INDIRECT_EFFECTS	COLONIZING_PLANT_SYSTEM	COLONIZATION-PLANT_DERIVED_SUBSTRATE_USAGE	PLANT_DERIVED_ORGANIC_ACID_UTILIZATION	PLANT_DERIVED_MALATE_UTILIZATION	PGPT0001442-leuC-K01703	1	5	1	1
PGPT0001443	INDIRECT_EFFECTS	COLONIZING_PLANT_SYSTEM	COLONIZATION-PLANT_DERIVED_SUBSTRATE_USAGE	PLANT_DERIVED_ORGANIC_ACID_UTILIZATION	PLANT_DERIVED_MALATE_UTILIZATION	PGPT0001443-leuD-K01704	1	4	1	2
PGPT0001445	DIRECT_EFFECTS	BIO-FERTILIZATION	PHOSPHATE_SOLUBILIZATION	P-SOLUBILISATION-ORGANIC_ACID_METABOLISM	P-SOLUBILISATION-OXALACETIC_ACID_BIOSYNTHESIS# PGPT	PGPT0001445-aceB|glcB-K01638	0	1	1	3
PGPT0001450	DIRECT_EFFECTS	BIO-FERTILIZATION	PHOSPHATE_SOLUBILIZATION	P-SOLUBILISATION-ORGANIC_ACID_METABOLISM	P-SOLUBILISATION-OXALACETIC_ACID_TRANSPORT# PGPT	PGPT0001450-dctA-K11103	0	4	1	1
PGPT0001455	DIRECT_EFFECTS	BIO-FERTILIZATION	PHOSPHATE_SOLUBILIZATION	P-SOLUBILISATION-ORGANIC_ACID_METABOLISM	P-SOLUBILISATION-CITRIC_ACID_BIOSYNTHESIS# PGPT	PGPT0001455-CS|gltA-K01647	2	4	3	1
PGPT0001465	DIRECT_EFFECTS	BIO-FERTILIZATION	PHOSPHATE_SOLUBILIZATION	P-SOLUBILISATION-ORGANIC_ACID_METABOLISM	P-SOLUBILISATION-CITRIC_ACID_BIOSYNTHESIS# PGPT	PGPT0001465-acnA-K01681	3	1	2	0
PGPT0001470	DIRECT_EFFECTS	BIO-FERTILIZATION	PHOSPHATE_SOLUBILIZATION	P-SOLUBILISATION-ORGANIC_ACID_METABOLISM	P-SOLUBILISATION-CITRIC_ACID_BIOSYNTHESIS# PGPT	PGPT0001470-acnB-K01682	0	1	0	2
PGPT0001471	INDIRECT_EFFECTS	COLONIZING_PLANT_SYSTEM	COLONIZATION-PLANT_DERIVED_SUBSTRATE_USAGE	PLANT_DERIVED_ORGANIC_ACID_UTILIZATION	PLANT_DERIVED_ACONITATE_UTILIZATION	PGPT0001471-IRG1_like-K17724	0	1	0	0
PGPT0001475	DIRECT_EFFECTS	BIO-FERTILIZATION	PHOSPHATE_SOLUBILIZATION	P-SOLUBILISATION-ORGANIC_ACID_METABOLISM	P-SOLUBILISATION-CITRIC_ACID_BIOSYNTHESIS# PGPT	PGPT0001475-aceK-K00906	0	1	0	1
PGPT0001480	DIRECT_EFFECTS	BIO-FERTILIZATION	PHOSPHATE_SOLUBILIZATION	P-SOLUBILISATION-ORGANIC_ACID_METABOLISM	P-SOLUBILISATION-CITRIC_ACID_BIOSYNTHESIS# PGPT	PGPT0001480-prpC-K01659	0	1	0	0
PGPT0001495	DIRECT_EFFECTS	BIO-FERTILIZATION	PHOSPHATE_SOLUBILIZATION	P-SOLUBILISATION-ORGANIC_ACID_METABOLISM	P-SOLUBILISATION-CITRIC_ACID_TRANSPORT# PGPT	PGPT0001495-citT-K09477	0	0	0	1
PGPT0001505	DIRECT_EFFECTS	BIO-FERTILIZATION	PHOSPHATE_SOLUBILIZATION	P-SOLUBILISATION-ORGANIC_ACID_METABOLISM	P-SOLUBILISATION-CITRIC_ACID_TRANSPORT# PGPT	PGPT0001505-citA|tcuC-K03288	0	1	0	0
PGPT0001515	DIRECT_EFFECTS	BIO-FERTILIZATION	PHOSPHATE_SOLUBILIZATION	P-SOLUBILISATION-ORGANIC_ACID_METABOLISM	P-SOLUBILISATION-ACONITIC_ACID_BIOSYNTHESIS# PGPT	PGPT0001515-acnD-K20455	0	1	0	0
PGPT0001520	DIRECT_EFFECTS	BIO-FERTILIZATION	PHOSPHATE_SOLUBILIZATION	P-SOLUBILISATION-ORGANIC_ACID_METABOLISM	P-SOLUBILISATION-ACONITIC_ACID_BIOSYNTHESIS# PGPT	PGPT0001520-prpF-K09788	0	1	0	0
PGPT0001525	DIRECT_EFFECTS	BIO-FERTILIZATION	PHOSPHATE_SOLUBILIZATION	P-SOLUBILISATION-ORGANIC_ACID_METABOLISM	P-SOLUBILISATION-KETO-|OXOGLUTARATE_TRANSPORT# PGPT	PGPT0001525-kgtP-K03761	0	1	1	0
PGPT0001530	DIRECT_EFFECTS	BIO-FERTILIZATION	PHOSPHATE_SOLUBILIZATION	P-SOLUBILISATION-ORGANIC_ACID_METABOLISM	P-SOLUBILISATION-SUCCINIC_ACID_ACID_BIOSYNTHESIS# PGPT	PGPT0001530-sucA-K00164	2	1	1	2
PGPT0001535	DIRECT_EFFECTS	BIO-FERTILIZATION	PHOSPHATE_SOLUBILIZATION	P-SOLUBILISATION-ORGANIC_ACID_METABOLISM	P-SOLUBILISATION-SUCCINIC_ACID_ACID_BIOSYNTHESIS# PGPT	PGPT0001535-sucB-K00658	0	1	1	1
PGPT0001540	DIRECT_EFFECTS	BIO-FERTILIZATION	PHOSPHATE_SOLUBILIZATION	P-SOLUBILISATION-ORGANIC_ACID_METABOLISM	P-SOLUBILISATION-SUCCINIC_ACID_ACID_BIOSYNTHESIS# PGPT	PGPT0001540-sucD-K01902	3	2	1	1
PGPT0001545	DIRECT_EFFECTS	BIO-FERTILIZATION	PHOSPHATE_SOLUBILIZATION	P-SOLUBILISATION-ORGANIC_ACID_METABOLISM	P-SOLUBILISATION-SUCCINIC_ACID_ACID_BIOSYNTHESIS# PGPT	PGPT0001545-aarC|cat1-K18118	2	1	0	0
PGPT0001550	DIRECT_EFFECTS	BIO-FERTILIZATION	PHOSPHATE_SOLUBILIZATION	P-SOLUBILISATION-ORGANIC_ACID_METABOLISM	P-SOLUBILISATION-SUCCINIC_ACID_ACID_BIOSYNTHESIS# PGPT	PGPT0001550-aceA-K01637	0	2	0	2
PGPT0001555	DIRECT_EFFECTS	BIO-FERTILIZATION	PHOSPHATE_SOLUBILIZATION	P-SOLUBILISATION-ORGANIC_ACID_METABOLISM	P-SOLUBILISATION-SUCCINIC_ACID_ACID_BIOSYNTHESIS# PGPT	PGPT0001555-prpB-K03417	0	1	0	0
PGPT0001565	DIRECT_EFFECTS	BIO-FERTILIZATION	PHOSPHATE_SOLUBILIZATION	P-SOLUBILISATION-ORGANIC_ACID_METABOLISM	P-SOLUBILISATION-SUCCINIC_ACID_ACID_BIOSYNTHESIS# PGPT	PGPT0001565-fadA|fadI-K00632	2	2	1	3
PGPT0001575	DIRECT_EFFECTS	BIO-FERTILIZATION	PHOSPHATE_SOLUBILIZATION	P-SOLUBILISATION-ORGANIC_ACID_METABOLISM	P-SOLUBILISATION-SUCCINIC_ACID_ACID_BIOSYNTHESIS# PGPT	PGPT0001575-hpaI|hpcH-K02510	0	1	2	3
PGPT0001580	DIRECT_EFFECTS	BIO-FERTILIZATION	PHOSPHATE_SOLUBILIZATION	P-SOLUBILISATION-ORGANIC_ACID_METABOLISM	P-SOLUBILISATION-SUCCINIC_ACID_ACID_BIOSYNTHESIS# PGPT	PGPT0001580-gabD-K00135	3	3	1	3
PGPT0001590	DIRECT_EFFECTS	BIO-FERTILIZATION	PHOSPHATE_SOLUBILIZATION	P-SOLUBILISATION-ORGANIC_ACID_METABOLISM	P-SOLUBILISATION-FUMARIC_ACID_BIOSYNTHESIS# PGPT	PGPT0001590-sdhD|frdD-K00242	0	1	1	1
PGPT0001595	DIRECT_EFFECTS	BIO-FERTILIZATION	PHOSPHATE_SOLUBILIZATION	P-SOLUBILISATION-ORGANIC_ACID_METABOLISM	P-SOLUBILISATION-FUMARIC_ACID_BIOSYNTHESIS# PGPT	PGPT0001595-sdhC|frdC-K00241	1	1	1	1
PGPT0001600	DIRECT_EFFECTS	BIO-FERTILIZATION	PHOSPHATE_SOLUBILIZATION	P-SOLUBILISATION-ORGANIC_ACID_METABOLISM	P-SOLUBILISATION-FUMARIC_ACID_BIOSYNTHESIS# PGPT	PGPT0001600-sdhB|frdB-K00240	1	1	1	3
PGPT0001605	DIRECT_EFFECTS	BIO-FERTILIZATION	PHOSPHATE_SOLUBILIZATION	P-SOLUBILISATION-ORGANIC_ACID_METABOLISM	P-SOLUBILISATION-FUMARIC_ACID_BIOSYNTHESIS# PGPT	PGPT0001605-sdhA|frdA-K00239	2	1	1	2
PGPT0001610	DIRECT_EFFECTS	BIO-FERTILIZATION	PHOSPHATE_SOLUBILIZATION	P-SOLUBILISATION-ORGANIC_ACID_METABOLISM	P-SOLUBILISATION-FUMARIC_ACID_BIOSYNTHESIS# PGPT	PGPT0001610-fahA-K01555	1	2	1	0
PGPT0001615	DIRECT_EFFECTS	BIO-FERTILIZATION	PHOSPHATE_SOLUBILIZATION	P-SOLUBILISATION-ORGANIC_ACID_METABOLISM	P-SOLUBILISATION-FUMARIC_ACID_BIOSYNTHESIS# PGPT	PGPT0001615-faaH-K16171	0	1	1	0
PGPT0001620	DIRECT_EFFECTS	BIO-FERTILIZATION	PHOSPHATE_SOLUBILIZATION	P-SOLUBILISATION-ORGANIC_ACID_METABOLISM	P-SOLUBILISATION-FUMARIC_ACID_BIOSYNTHESIS# PGPT	PGPT0001620-nagK-K16165	0	3	1	0
PGPT0001625	DIRECT_EFFECTS	BIO-FERTILIZATION	PHOSPHATE_SOLUBILIZATION	P-SOLUBILISATION-ORGANIC_ACID_METABOLISM	P-SOLUBILISATION-FUMARIC_ACID_BIOSYNTHESIS# PGPT	PGPT0001625-ycgM-K01557	0	0	0	3
PGPT0001630	DIRECT_EFFECTS	BIO-FERTILIZATION	PHOSPHATE_SOLUBILIZATION	P-SOLUBILISATION-ORGANIC_ACID_METABOLISM	P-SOLUBILISATION-FUMARIC_ACID_BIOSYNTHESIS# PGPT	PGPT0001630-hpaF-K16164	2	0	0	0
PGPT0001635	DIRECT_EFFECTS	BIO-FERTILIZATION	PHOSPHATE_SOLUBILIZATION	P-SOLUBILISATION-ORGANIC_ACID_METABOLISM	P-SOLUBILISATION-MALIC_ACID_BIOSYNTHESIS# PGPT	PGPT0001635-fumA|fumB-K01676	1	1	1	2
PGPT0001650	DIRECT_EFFECTS	BIO-FERTILIZATION	PHOSPHATE_SOLUBILIZATION	P-SOLUBILISATION-ORGANIC_ACID_METABOLISM	P-SOLUBILISATION-MALIC_ACID_BIOSYNTHESIS# PGPT	PGPT0001650-fumC-K01679	1	1	1	1
PGPT0001655	DIRECT_EFFECTS	BIO-FERTILIZATION	PHOSPHATE_SOLUBILIZATION	P-SOLUBILISATION-ORGANIC_ACID_METABOLISM	P-SOLUBILISATION-MALIC_ACID_BIOSYNTHESIS# PGPT	PGPT0001655-fumD-K01675	0	0	0	1
PGPT0001675	DIRECT_EFFECTS	BIO-FERTILIZATION	PHOSPHATE_SOLUBILIZATION	P-SOLUBILISATION-ORGANIC_ACID_METABOLISM	P-SOLUBILISATION-MALIC_ACID_BIOSYNTHESIS# PGPT	PGPT0001675-mcl-K08691	1	0	1	0
PGPT0001685	DIRECT_EFFECTS	BIO-FERTILIZATION	PHOSPHATE_SOLUBILIZATION	P-SOLUBILISATION-ORGANIC_ACID_METABOLISM	P-SOLUBILISATION-MALIC_ACID_BIOSYNTHESIS# PGPT	PGPT0001685-maeB-K00029	0	2	3	2
PGPT0001695	DIRECT_EFFECTS	BIO-FERTILIZATION	PHOSPHATE_SOLUBILIZATION	P-SOLUBILISATION-ORGANIC_ACID_METABOLISM	P-SOLUBILISATION-MALONIC_ACID_BIOSYNTHESIS# PGPT	PGPT0001695-accA-K01962	0	1	1	1
PGPT0001700	DIRECT_EFFECTS	BIO-FERTILIZATION	PHOSPHATE_SOLUBILIZATION	P-SOLUBILISATION-ORGANIC_ACID_METABOLISM	P-SOLUBILISATION-MALONIC_ACID_BIOSYNTHESIS# PGPT	PGPT0001700-accB|bccP-K02160	1	1	1	0
PGPT0001705	DIRECT_EFFECTS	BIO-FERTILIZATION	PHOSPHATE_SOLUBILIZATION	P-SOLUBILISATION-ORGANIC_ACID_METABOLISM	P-SOLUBILISATION-MALONIC_ACID_BIOSYNTHESIS# PGPT	PGPT0001705-accC-K01961	1	2	2	0
PGPT0001710	DIRECT_EFFECTS	BIO-FERTILIZATION	PHOSPHATE_SOLUBILIZATION	P-SOLUBILISATION-ORGANIC_ACID_METABOLISM	P-SOLUBILISATION-MALONIC_ACID_BIOSYNTHESIS# PGPT	PGPT0001710-accD-K01963	1	1	1	2
PGPT0001711	DIRECT_EFFECTS	BIO-FERTILIZATION	PHOSPHATE_SOLUBILIZATION	P-SOLUBILISATION-ORGANIC_ACID_METABOLISM	P-SOLUBILISATION-MALONIC_ACID_BIOSYNTHESIS# PGPT	PGPT0001711-pccA-K01965	2	1	2	0
PGPT0001712	DIRECT_EFFECTS	BIO-FERTILIZATION	PHOSPHATE_SOLUBILIZATION	P-SOLUBILISATION-ORGANIC_ACID_METABOLISM	P-SOLUBILISATION-MALONIC_ACID_BIOSYNTHESIS# PGPT	PGPT0001712-pccB-K01966	2	1	1	0
PGPT0001715	DIRECT_EFFECTS	BIO-FERTILIZATION	PHOSPHATE_SOLUBILIZATION	P-SOLUBILISATION-ORGANIC_ACID_METABOLISM	P-SOLUBILISATION-MALONIC_ACID_BIOSYNTHESIS# PGPT	PGPT0001715-mdcR-K13928	0	1	0	0
PGPT0001720	DIRECT_EFFECTS	BIO-FERTILIZATION	PHOSPHATE_SOLUBILIZATION	P-SOLUBILISATION-ORGANIC_ACID_METABOLISM	P-SOLUBILISATION-MALONIC_ACID_TRANSPORT# PGPT	PGPT0001720-mdcF-K13936	0	1	3	1
PGPT0001721	INDIRECT_EFFECTS	COLONIZING_PLANT_SYSTEM	COLONIZATION-PLANT_DERIVED_SUBSTRATE_USAGE	PLANT_DERIVED_ORGANIC_ACID_TRANSPORT	PLANT_DERIVED_MALONATE_TRANSPORT	PGPT0001721-matB-K18661	0	3	2	0
PGPT0001730	DIRECT_EFFECTS	BIO-FERTILIZATION	PHOSPHATE_SOLUBILIZATION	P-SOLUBILISATION-ORGANIC_ACID_METABOLISM	P-SOLUBILISATION-GLYCOLIC_ACID_BIOSYNTHESIS# PGPT	PGPT0001730-gph-K01091	1	3	3	2
PGPT0001735	DIRECT_EFFECTS	BIO-FERTILIZATION	PHOSPHATE_SOLUBILIZATION	P-SOLUBILISATION-ORGANIC_ACID_METABOLISM	P-SOLUBILISATION-GLYCOLIC_ACID_BIOSYNTHESIS	PGPT0001735-prkB|cbbP-K00855	0	0	0	1
PGPT0001745	DIRECT_EFFECTS	BIO-FERTILIZATION	PHOSPHATE_SOLUBILIZATION	P-SOLUBILISATION-ORGANIC_ACID_METABOLISM	P-SOLUBILISATION-LACTIC_ACID_BIOSYNTHESIS# PGPT	PGPT0001745-lra6-K18336	1	1	0	0
PGPT0001765	DIRECT_EFFECTS	BIO-FERTILIZATION	PHOSPHATE_SOLUBILIZATION	P-SOLUBILISATION-ORGANIC_ACID_METABOLISM	P-SOLUBILISATION-LACTIC_ACID_BIOSYNTHESIS# PGPT	PGPT0001765-lldD-K00101	0	1	1	2
PGPT0001770	DIRECT_EFFECTS	BIO-FERTILIZATION	PHOSPHATE_SOLUBILIZATION	P-SOLUBILISATION-ORGANIC_ACID_METABOLISM	P-SOLUBILISATION-LACTIC_ACID_BIOSYNTHESIS# PGPT	PGPT0001770-gloB|gloC-K01069	8	6	5	1
PGPT0001780	DIRECT_EFFECTS	BIO-FERTILIZATION	PHOSPHATE_SOLUBILIZATION	P-SOLUBILISATION-ORGANIC_ACID_METABOLISM	P-SOLUBILISATION-LACTIC_ACID_BIOSYNTHESIS# PGPT	PGPT0001780-mgsA-K01734	0	1	0	0
PGPT0001790	DIRECT_EFFECTS	BIO-FERTILIZATION	PHOSPHATE_SOLUBILIZATION	P-SOLUBILISATION-ORGANIC_ACID_METABOLISM	P-SOLUBILISATION-LACTIC_ACID_BIOSYNTHESIS# PGPT	PGPT0001790-pct-K01026	0	1	0	0
PGPT0001800	DIRECT_EFFECTS	BIO-FERTILIZATION	PHOSPHATE_SOLUBILIZATION	P-SOLUBILISATION-ORGANIC_ACID_METABOLISM	P-SOLUBILISATION-LACTIC_ACID_TRANSPORT# PGPT	PGPT0001800-lctP-K03303	0	2	0	0
PGPT0001805	DIRECT_EFFECTS	BIO-FERTILIZATION	PHOSPHATE_SOLUBILIZATION	P-SOLUBILISATION-ORGANIC_ACID_METABOLISM	P-SOLUBILISATION-LACTIC_ACID_TRANSPORT# PGPT	PGPT0001805-ldlP|lctP-K00427	0	0	0	2
PGPT0001820	DIRECT_EFFECTS	BIO-FERTILIZATION	PHOSPHATE_SOLUBILIZATION	P-SOLUBILISATION-ORGANIC_ACID_METABOLISM	P-SOLUBILISATION-BUTYRIC_ACID_BIOSYNTHESIS# PGPT	PGPT0001820-ccrA-K17829	1	0	1	0
PGPT0001830	DIRECT_EFFECTS	BIO-FERTILIZATION	PHOSPHATE_SOLUBILIZATION	P-SOLUBILISATION-ORGANIC_ACID_METABOLISM	P-SOLUBILISATION-BUTYRIC_ACID_BIOSYNTHESIS# PGPT	PGPT0001830-yciA-K10806	0	2	1	0
PGPT0001835	DIRECT_EFFECTS	BIO-FERTILIZATION	PHOSPHATE_SOLUBILIZATION	P-SOLUBILISATION-ORGANIC_ACID_METABOLISM	P-SOLUBILISATION-BUTYRIC_ACID_BIOSYNTHESIS# PGPT	PGPT0001835-tesB-K10805	2	0	1	0
PGPT0001840	DIRECT_EFFECTS	BIO-FERTILIZATION	PHOSPHATE_SOLUBILIZATION	P-SOLUBILISATION-ORGANIC_ACID_METABOLISM	P-SOLUBILISATION-BUTYRIC_ACID_BIOSYNTHESIS# PGPT	PGPT0001840-tesA-K10804	0	1	3	0
PGPT0001841	DIRECT_EFFECTS	BIO-FERTILIZATION	PHOSPHATE_SOLUBILIZATION	P-SOLUBILISATION-ORGANIC_ACID_METABOLISM	P-SOLUBILISATION-BUTYRIC_ACID_BIOSYNTHESIS# PGPT	PGPT0001841-yigI-NA	0	1	0	1
PGPT0001845	DIRECT_EFFECTS	BIO-FERTILIZATION	PHOSPHATE_SOLUBILIZATION	P-SOLUBILISATION-ORGANIC_ACID_METABOLISM	P-SOLUBILISATION-BUTYRIC_ACID_BIOSYNTHESIS# PGPT	PGPT0001845-menI|ydiI|ydiL|ydiI|ybdB-K19222	1	2	0	0
PGPT0001850	DIRECT_EFFECTS	BIO-FERTILIZATION	PHOSPHATE_SOLUBILIZATION	P-SOLUBILISATION-ORGANIC_ACID_METABOLISM	P-SOLUBILISATION-BUTYRIC_ACID_BIOSYNTHESIS# PGPT	PGPT0001850-ybgC-K07107	3	5	3	1
PGPT0001855	DIRECT_EFFECTS	BIO-FERTILIZATION	PHOSPHATE_SOLUBILIZATION	P-SOLUBILISATION-ORGANIC_ACID_METABOLISM	P-SOLUBILISATION-BUTYRIC_ACID_BIOSYNTHESIS# PGPT	PGPT0001855-ybhC|pemB|pemA-K01051	0	0	1	0
PGPT0001860	DIRECT_EFFECTS	BIO-FERTILIZATION	PHOSPHATE_SOLUBILIZATION	P-SOLUBILISATION-ORGANIC_ACID_METABOLISM	P-SOLUBILISATION-VALERIC_ACID_BIOSYNTHESIS# PGPT	PGPT0001860-paaF|echA-K01692	3	5	7	1
PGPT0001865	DIRECT_EFFECTS	BIO-FERTILIZATION	PHOSPHATE_SOLUBILIZATION	P-SOLUBILISATION-ORGANIC_ACID_METABOLISM	P-SOLUBILISATION-VALERIC_ACID_BIOSYNTHESIS# PGPT	PGPT0001865-fadB-K01825	0	0	0	1
PGPT0001870	DIRECT_EFFECTS	BIO-FERTILIZATION	PHOSPHATE_SOLUBILIZATION	P-SOLUBILISATION-ORGANIC_ACID_METABOLISM	P-SOLUBILISATION-VALERIC_ACID_BIOSYNTHESIS# PGPT	PGPT0001870-fadJ-K01782	1	0	1	3
PGPT0001875	DIRECT_EFFECTS	BIO-FERTILIZATION	PHOSPHATE_SOLUBILIZATION	P-SOLUBILISATION-ORGANIC_ACID_METABOLISM	P-SOLUBILISATION-VALERIC_ACID_BIOSYNTHESIS# PGPT	PGPT0001875-ilvD-K01687	2	4	3	3
PGPT0001880	DIRECT_EFFECTS	BIO-FERTILIZATION	PHOSPHATE_SOLUBILIZATION	P-SOLUBILISATION-ORGANIC_ACID_METABOLISM	P-SOLUBILISATION-VALERIC_ACID_BIOSYNTHESIS# PGPT	PGPT0001880-alaA-K14260	0	1	0	0
PGPT0001885	DIRECT_EFFECTS	BIO-FERTILIZATION	PHOSPHATE_SOLUBILIZATION	P-SOLUBILISATION-ORGANIC_ACID_METABOLISM	P-SOLUBILISATION-VALERIC_ACID_BIOSYNTHESIS# PGPT	PGPT0001885-actA-K00835	0	0	0	2
PGPT0001890	DIRECT_EFFECTS	BIO-FERTILIZATION	PHOSPHATE_SOLUBILIZATION	P-SOLUBILISATION-ORGANIC_ACID_METABOLISM	P-SOLUBILISATION-PYRUVIC_ACID_BIOSYNTHESIS# PGPT	PGPT0001890-dld-K00102	0	5	6	1
PGPT0001896	DIRECT_EFFECTS	BIO-FERTILIZATION	PHOSPHATE_SOLUBILIZATION	P-SOLUBILISATION-ORGANIC_ACID_METABOLISM	P-SOLUBILISATION-PYRUVIC_ACID_BIOSYNTHESIS# PGPT	PGPT0001896-nagL-K01801	0	1	0	0
PGPT0001900	DIRECT_EFFECTS	BIO-FERTILIZATION	PHOSPHATE_SOLUBILIZATION	P-SOLUBILISATION-ORGANIC_ACID_METABOLISM	P-SOLUBILISATION-PYRUVIC_ACID_BIOSYNTHESIS# PGPT	PGPT0001900-dld-K03777	0	0	0	1
PGPT0001905	DIRECT_EFFECTS	BIO-FERTILIZATION	PHOSPHATE_SOLUBILIZATION	P-SOLUBILISATION-ORGANIC_ACID_METABOLISM	P-SOLUBILISATION-PYRUVIC_ACID_BIOSYNTHESIS# PGPT	PGPT0001905-ttuC|dmlA-K07246	0	1	2	0
PGPT0001910	DIRECT_EFFECTS	BIO-FERTILIZATION	PHOSPHATE_SOLUBILIZATION	P-SOLUBILISATION-ORGANIC_ACID_METABOLISM	P-SOLUBILISATION-PYRUVIC_ACID_BIOSYNTHESIS# PGPT	PGPT0001910-dgdA-K00827	1	0	2	0
PGPT0001915	DIRECT_EFFECTS	BIO-FERTILIZATION	PHOSPHATE_SOLUBILIZATION	P-SOLUBILISATION-ORGANIC_ACID_METABOLISM	P-SOLUBILISATION-PYRUVIC_ACID_BIOSYNTHESIS# PGPT	PGPT0001915-dat-K00824	0	1	1	0
PGPT0001920	DIRECT_EFFECTS	BIO-FERTILIZATION	PHOSPHATE_SOLUBILIZATION	P-SOLUBILISATION-ORGANIC_ACID_METABOLISM	P-SOLUBILISATION-PYRUVIC_ACID_BIOSYNTHESIS# PGPT	PGPT0001920-sgaA-K00830	0	1	0	0
PGPT0001950	DIRECT_EFFECTS	BIO-FERTILIZATION	PHOSPHATE_SOLUBILIZATION	P-SOLUBILISATION-ORGANIC_ACID_METABOLISM	P-SOLUBILISATION-PYRUVIC_ACID_BIOSYNTHESIS# PGPT	PGPT0001950-pflD|ybiW|tdcE-K00656	0	0	0	5
PGPT0001960	DIRECT_EFFECTS	BIO-FERTILIZATION	PHOSPHATE_SOLUBILIZATION	P-SOLUBILISATION-ORGANIC_ACID_METABOLISM	P-SOLUBILISATION-PYRUVIC_ACID_BIOSYNTHESIS# PGPT	PGPT0001960-ilvA|tdcB-K01754	2	3	6	3
PGPT0001970	DIRECT_EFFECTS	BIO-FERTILIZATION	PHOSPHATE_SOLUBILIZATION	P-SOLUBILISATION-ORGANIC_ACID_METABOLISM	P-SOLUBILISATION-PYRUVIC_ACID_BIOSYNTHESIS# PGPT	PGPT0001970-dsdA-K01753	0	2	3	2
PGPT0001975	DIRECT_EFFECTS	BIO-FERTILIZATION	PHOSPHATE_SOLUBILIZATION	P-SOLUBILISATION-ORGANIC_ACID_METABOLISM	P-SOLUBILISATION-PYRUVIC_ACID_BIOSYNTHESIS# PGPT	PGPT0001975-sdaA|sdaB|tdcG-K01752	0	1	1	2
PGPT0001980	DIRECT_EFFECTS	BIO-FERTILIZATION	PHOSPHATE_SOLUBILIZATION	P-SOLUBILISATION-ORGANIC_ACID_METABOLISM	P-SOLUBILISATION-SUCCINIC_ACID_ACID_BIOSYNTHESIS# PGPT	PGPT0001980-metB|met|cysA-K01758	2	0	1	2
PGPT0001990	DIRECT_EFFECTS	BIO-FERTILIZATION	PHOSPHATE_SOLUBILIZATION	P-SOLUBILISATION-ORGANIC_ACID_METABOLISM	P-SOLUBILISATION-PYRUVIC_ACID_BIOSYNTHESIS# PGPT	PGPT0001990-patB|malY-K14155	0	1	1	0
PGPT0001995	DIRECT_EFFECTS	BIO-FERTILIZATION	PHOSPHATE_SOLUBILIZATION	P-SOLUBILISATION-ORGANIC_ACID_METABOLISM	P-SOLUBILISATION-PYRUVIC_ACID_BIOSYNTHESIS# PGPT	PGPT0001995-metC-K01760	0	7	2	1
PGPT0002000	DIRECT_EFFECTS	BIO-FERTILIZATION	PHOSPHATE_SOLUBILIZATION	P-SOLUBILISATION-ORGANIC_ACID_METABOLISM	P-SOLUBILISATION-PYRUVIC_ACID_BIOSYNTHESIS# PGPT	PGPT0002000-cuyA-K17950	0	1	0	0
PGPT0002020	DIRECT_EFFECTS	BIO-FERTILIZATION	PHOSPHATE_SOLUBILIZATION	P-SOLUBILISATION-ORGANIC_ACID_METABOLISM	P-SOLUBILISATION-PYRUVIC_ACID_BIOSYNTHESIS# PGPT	PGPT0002020-pyk-K00873	1	2	1	2
PGPT0002025	DIRECT_EFFECTS	BIO-FERTILIZATION	PHOSPHATE_SOLUBILIZATION	P-SOLUBILISATION-ORGANIC_ACID_METABOLISM	P-SOLUBILISATION-PYRUVIC_ACID_BIOSYNTHESIS# PGPT	PGPT0002025-ptsI-K08483	1	1	0	2
PGPT0002030	DIRECT_EFFECTS	BIO-FERTILIZATION	PHOSPHATE_SOLUBILIZATION	P-SOLUBILISATION-ORGANIC_ACID_METABOLISM	P-SOLUBILISATION-PYRUVIC_ACID_BIOSYNTHESIS# PGPT	PGPT0002030-ptsP-K08484	0	0	1	1
PGPT0002035	DIRECT_EFFECTS	BIO-FERTILIZATION	PHOSPHATE_SOLUBILIZATION	P-SOLUBILISATION-ORGANIC_ACID_METABOLISM	P-SOLUBILISATION-PYRUVIC_ACID_BIOSYNTHESIS# PGPT	PGPT0002035-pps|ppsA-K01007	0	1	0	2
PGPT0002040	DIRECT_EFFECTS	BIO-FERTILIZATION	PHOSPHATE_SOLUBILIZATION	P-SOLUBILISATION-ORGANIC_ACID_METABOLISM	P-SOLUBILISATION-PYRUVIC_ACID_BIOSYNTHESIS# PGPT	PGPT0002040-ppdK-K01006	0	0	1	0
PGPT0002045	DIRECT_EFFECTS	BIO-FERTILIZATION	PHOSPHATE_SOLUBILIZATION	P-SOLUBILISATION-ORGANIC_ACID_METABOLISM	P-SOLUBILISATION-PYRUVIC_ACID_BIOSYNTHESIS# PGPT	PGPT0002045-sseA-K01011	2	1	2	3
PGPT0002060	DIRECT_EFFECTS	BIO-FERTILIZATION	PHOSPHATE_SOLUBILIZATION	P-SOLUBILISATION-ORGANIC_ACID_METABOLISM	P-SOLUBILISATION-PYRUVIC_ACID_BIOSYNTHESIS# PGPT	PGPT0002060-eda-K01625	1	1	1	1
PGPT0002065	DIRECT_EFFECTS	BIO-FERTILIZATION	PHOSPHATE_SOLUBILIZATION	P-SOLUBILISATION-ORGANIC_ACID_METABOLISM	P-SOLUBILISATION-PYRUVIC_ACID_BIOSYNTHESIS# PGPT	PGPT0002065-dgaF-K17463	0	0	0	1
PGPT0002080	DIRECT_EFFECTS	BIO-FERTILIZATION	PHOSPHATE_SOLUBILIZATION	P-SOLUBILISATION-ORGANIC_ACID_METABOLISM	P-SOLUBILISATION-PYRUVIC_ACID_BIOSYNTHESIS# PGPT	PGPT0002080-dapA|mosA-K01714	1	5	8	1
PGPT0002085	DIRECT_EFFECTS	BIO-FERTILIZATION	PHOSPHATE_SOLUBILIZATION	P-SOLUBILISATION-ORGANIC_ACID_METABOLISM	P-SOLUBILISATION-PYRUVIC_ACID_BIOSYNTHESIS# PGPT	PGPT0002085-ligK|galC-K10218	1	3	2	1
PGPT0002090	DIRECT_EFFECTS	BIO-FERTILIZATION	PHOSPHATE_SOLUBILIZATION	P-SOLUBILISATION-ORGANIC_ACID_METABOLISM	P-SOLUBILISATION-PYRUVIC_ACID_BIOSYNTHESIS# PGPT	PGPT0002090-garL-K01630	0	1	0	0
PGPT0002095	DIRECT_EFFECTS	BIO-FERTILIZATION	PHOSPHATE_SOLUBILIZATION	P-SOLUBILISATION-ORGANIC_ACID_METABOLISM	P-SOLUBILISATION-PYRUVIC_ACID_BIOSYNTHESIS# PGPT	PGPT0002095-yjhH|yagE-K22397	0	0	0	2
PGPT0002100	DIRECT_EFFECTS	BIO-FERTILIZATION	PHOSPHATE_SOLUBILIZATION	P-SOLUBILISATION-ORGANIC_ACID_METABOLISM	P-SOLUBILISATION-PYRUVIC_ACID_BIOSYNTHESIS# PGPT	PGPT0002100-dml-K20454	1	2	1	0
PGPT0002120	DIRECT_EFFECTS	BIO-FERTILIZATION	PHOSPHATE_SOLUBILIZATION	P-SOLUBILISATION-ORGANIC_ACID_METABOLISM	P-SOLUBILISATION-FORMIC_ACID_BIOSYNTHESIS# PGPT	PGPT0002120-frmB|fghA-K01070	0	2	1	2
PGPT0002130	DIRECT_EFFECTS	BIO-FERTILIZATION	PHOSPHATE_SOLUBILIZATION	P-SOLUBILISATION-ORGANIC_ACID_METABOLISM	P-SOLUBILISATION-FORMIC_ACID_BIOSYNTHESIS# PGPT	PGPT0002130-frc|yfdW-K07749	0	8	3	0
PGPT0002155	DIRECT_EFFECTS	BIO-FERTILIZATION	PHOSPHATE_SOLUBILIZATION	P-SOLUBILISATION-ORGANIC_ACID_METABOLISM	P-SOLUBILISATION-FORMIC_ACID_BIOSYNTHESIS# PGPT	PGPT0002155-fwdE|fmdE-K11261	0	0	1	0
PGPT0002190	DIRECT_EFFECTS	BIO-FERTILIZATION	PHOSPHATE_SOLUBILIZATION	P-SOLUBILISATION-ORGANIC_ACID_METABOLISM	P-SOLUBILISATION-GALACTONIC_ACID_TRANSPORT# PGPT	PGPT0002190-dgoT-K08194	0	1	0	2
PGPT0002220	DIRECT_EFFECTS	BIO-FERTILIZATION	PHOSPHATE_SOLUBILIZATION	P-SOLUBILISATION-ORGANIC_ACID_METABOLISM	P-SOLUBILISATION-GALACTONIC_ACID_BIOSYNTHESIS# PGPT	PGPT0002220-dgoD-K01684	0	0	0	1
PGPT0002230	DIRECT_EFFECTS	BIO-FERTILIZATION	PHOSPHATE_SOLUBILIZATION	P-SOLUBILISATION-ORGANIC_ACID_METABOLISM	P-SOLUBILISATION-PROPIONIC_ACID_BIOSYNTHESIS# PGPT	PGPT0002230-tdcD-K00932	0	0	0	3
PGPT0002255	DIRECT_EFFECTS	BIO-FERTILIZATION	PHOSPHATE_SOLUBILIZATION	P-SOLUBILISATION-ORGANIC_ACID_METABOLISM	P-SOLUBILISATION-PROPIONIC_ACID_BIOSYNTHESIS# PGPT	PGPT0002255-acdAB-K24012	2	4	2	0
PGPT0002265	DIRECT_EFFECTS	BIO-FERTILIZATION	PHOSPHATE_SOLUBILIZATION	P-SOLUBILISATION-ORGANIC_ACID_METABOLISM	P-SOLUBILISATION-PROPIONIC_ACID_BIOSYNTHESIS# PGPT	PGPT0002265-acs-K01895	4	4	4	3
PGPT0002270	DIRECT_EFFECTS	BIO-FERTILIZATION	PHOSPHATE_SOLUBILIZATION	P-SOLUBILISATION-ORGANIC_ACID_METABOLISM	P-SOLUBILISATION-PROPIONIC_ACID_BIOSYNTHESIS# PGPT	PGPT0002270-prpE-K01908	0	1	1	0
PGPT0002275	DIRECT_EFFECTS	BIO-FERTILIZATION	PHOSPHATE_SOLUBILIZATION	P-SOLUBILISATION-ORGANIC_ACID_METABOLISM	P-SOLUBILISATION-PROPIONIC_ACID_BIOSYNTHESIS# PGPT	PGPT0002275-acuI|yhdH-K19745	0	1	1	0
PGPT0002285	DIRECT_EFFECTS	BIO-FERTILIZATION	PHOSPHATE_SOLUBILIZATION	P-SOLUBILISATION-ORGANIC_ACID_METABOLISM	P-SOLUBILISATION-PROPIONIC_ACID_BIOSYNTHESIS# PGPT	PGPT0002285-bcd-K00248	5	8	2	0
PGPT0002290	DIRECT_EFFECTS	BIO-FERTILIZATION	PHOSPHATE_SOLUBILIZATION	P-SOLUBILISATION-ORGANIC_ACID_METABOLISM	P-SOLUBILISATION-PROPIONIC_ACID_BIOSYNTHESIS# PGPT	PGPT0002290-aco|acx-K00232	2	0	0	0
PGPT0002295	DIRECT_EFFECTS	BIO-FERTILIZATION	PHOSPHATE_SOLUBILIZATION	P-SOLUBILISATION-ORGANIC_ACID_METABOLISM	P-SOLUBILISATION-PROPIONIC_ACID_BIOSYNTHESIS# PGPT	PGPT0002295-mmsA|iolA-K00140	2	1	1	0
PGPT0002300	DIRECT_EFFECTS	BIO-FERTILIZATION	PHOSPHATE_SOLUBILIZATION	P-SOLUBILISATION-ORGANIC_ACID_METABOLISM	P-SOLUBILISATION-PROPIONIC_ACID_BIOSYNTHESIS# PGPT	PGPT0002300-mmdA-K01604	0	1	0	0
PGPT0002325	DIRECT_EFFECTS	BIO-FERTILIZATION	PHOSPHATE_SOLUBILIZATION	P-SOLUBILISATION-ORGANIC_ACID_METABOLISM	P-SOLUBILISATION-TARTARIC_ACID_TRANSPORT	PGPT0002325-ttuB-K13021	1	3	0	3
PGPT0002330	DIRECT_EFFECTS	BIO-FERTILIZATION	PHOSPHATE_SOLUBILIZATION	P-SOLUBILISATION-OTHER_ACID_METABOLISM	P-SOLUBILISATION-SULFURIC_ACID_BIOSYNTHESIS# PGPT	PGPT0002330-soxA-K17222	0	1	0	0
PGPT0002335	DIRECT_EFFECTS	BIO-FERTILIZATION	PHOSPHATE_SOLUBILIZATION	P-SOLUBILISATION-OTHER_ACID_METABOLISM	P-SOLUBILISATION-SULFURIC_ACID_BIOSYNTHESIS# PGPT	PGPT0002335-soxB-K17224	0	1	0	0
PGPT0002345	DIRECT_EFFECTS	BIO-FERTILIZATION	PHOSPHATE_SOLUBILIZATION	P-SOLUBILISATION-OTHER_ACID_METABOLISM	P-SOLUBILISATION-SULFURIC_ACID_BIOSYNTHESIS# PGPT	PGPT0002345-soxD-K22622	0	1	0	0
PGPT0002350	DIRECT_EFFECTS	BIO-FERTILIZATION	PHOSPHATE_SOLUBILIZATION	P-SOLUBILISATION-OTHER_ACID_METABOLISM	P-SOLUBILISATION-SULFURIC_ACID_BIOSYNTHESIS# PGPT	PGPT0002350-soxX-K17223	0	1	0	0
PGPT0002355	DIRECT_EFFECTS	BIO-FERTILIZATION	PHOSPHATE_SOLUBILIZATION	P-SOLUBILISATION-OTHER_ACID_METABOLISM	P-SOLUBILISATION-SULFURIC_ACID_BIOSYNTHESIS# PGPT	PGPT0002355-soxY-K17226	0	1	0	0
PGPT0002360	DIRECT_EFFECTS	BIO-FERTILIZATION	PHOSPHATE_SOLUBILIZATION	P-SOLUBILISATION-OTHER_ACID_METABOLISM	P-SOLUBILISATION-SULFURIC_ACID_BIOSYNTHESIS# PGPT	PGPT0002360-soxZ-K17227	0	1	0	0
PGPT0002365	DIRECT_EFFECTS	BIO-FERTILIZATION	PHOSPHATE_SOLUBILIZATION	P-SOLUBILISATION-OTHER_ACID_METABOLISM	P-SOLUBILISATION-SULFURIC_ACID_BIOSYNTHESIS# PGPT	PGPT0002365-sorA-K05301	1	0	0	0
PGPT0002375	DIRECT_EFFECTS	BIO-FERTILIZATION	PHOSPHATE_SOLUBILIZATION	P-SOLUBILISATION-OTHER_ACID_METABOLISM	P-SOLUBILISATION-SULFURIC_ACID_BIOSYNTHESIS# PGPT	PGPT0002375-SUOX_like-K00387	1	0	1	0
PGPT0002395	DIRECT_EFFECTS	BIO-FERTILIZATION	PHOSPHATE_SOLUBILIZATION	P-SOLUBILISATION-OTHER_ACID_METABOLISM	P-SOLUBILISATION-SULFURIC_ACID_BIOSYNTHESIS# PGPT	PGPT0002395-cysNC-K00955	0	0	1	0
PGPT0002400	DIRECT_EFFECTS	BIO-FERTILIZATION	PHOSPHATE_SOLUBILIZATION	P-SOLUBILISATION-OTHER_ACID_METABOLISM	P-SOLUBILISATION-SULFURIC_ACID_BIOSYNTHESIS# PGPT	PGPT0002400-cysN-K00956	1	1	0	3
PGPT0002405	DIRECT_EFFECTS	BIO-FERTILIZATION	PHOSPHATE_SOLUBILIZATION	P-SOLUBILISATION-OTHER_ACID_METABOLISM	P-SOLUBILISATION-SULFURIC_ACID_BIOSYNTHESIS# PGPT	PGPT0002405-cysD-K00957	1	1	1	1
PGPT0002410	DIRECT_EFFECTS	BIO-FERTILIZATION	PHOSPHATE_SOLUBILIZATION	P-SOLUBILISATION-OTHER_ACID_METABOLISM	P-SOLUBILISATION-SULFURIC_ACID_BIOSYNTHESIS# PGPT	PGPT0002410-sat|met3-K00958	1	0	0	0
PGPT0002415	DIRECT_EFFECTS	BIO-FERTILIZATION	CARBON_DIOXID_FIXATION	CO2_FIXATION-ALTERNATIVE_PAHTWAYS	PHOTOSYNTHETIC_CO2_FIXATION# PGPT	PGPT0002415-cynT|can-K01673	1	2	1	1
PGPT0002425	DIRECT_EFFECTS	BIO-FERTILIZATION	PHOSPHATE_SOLUBILIZATION	P-SOLUBILISATION-OTHER_ACID_METABOLISM	P-SOLUBILISATION-CARBONIC_ACID_BIOSYNTHESIS# PGPT	PGPT0002425-GAMMACA_like-K01726	0	1	1	0
PGPT0002430	DIRECT_EFFECTS	BIO-FERTILIZATION	PHOSPHATE_SOLUBILIZATION	P-SOLUBILISATION-OTHER_ACID_METABOLISM	P-SOLUBILISATION-PHOSPHONATE_DEGRADATION	PGPT0002430-phnA-K19670	0	0	1	0
PGPT0002435	DIRECT_EFFECTS	BIO-FERTILIZATION	PHOSPHATE_SOLUBILIZATION	P-SOLUBILISATION-OTHER_ACID_METABOLISM	P-SOLUBILISATION-PHOSPHONATE_DEGRADATION	PGPT0002435-phnG-K06166	0	1	1	1
PGPT0002440	DIRECT_EFFECTS	BIO-FERTILIZATION	PHOSPHATE_SOLUBILIZATION	P-SOLUBILISATION-OTHER_ACID_METABOLISM	P-SOLUBILISATION-PHOSPHONATE_DEGRADATION	PGPT0002440-phnH-K06165	0	1	1	1
PGPT0002445	DIRECT_EFFECTS	BIO-FERTILIZATION	PHOSPHATE_SOLUBILIZATION	P-SOLUBILISATION-OTHER_ACID_METABOLISM	P-SOLUBILISATION-PHOSPHONATE_DEGRADATION	PGPT0002445-phnI-K06164	0	1	2	1
PGPT0002450	DIRECT_EFFECTS	BIO-FERTILIZATION	PHOSPHATE_SOLUBILIZATION	P-SOLUBILISATION-OTHER_ACID_METABOLISM	P-SOLUBILISATION-PHOSPHONATE_DEGRADATION	PGPT0002450-phnJ-K06163	0	1	2	2
PGPT0002455	DIRECT_EFFECTS	BIO-FERTILIZATION	PHOSPHATE_SOLUBILIZATION	P-SOLUBILISATION-OTHER_ACID_METABOLISM	P-SOLUBILISATION-PHOSPHONATE_DEGRADATION	PGPT0002455-phnK-K05780	0	1	1	1
PGPT0002460	DIRECT_EFFECTS	BIO-FERTILIZATION	PHOSPHATE_SOLUBILIZATION	P-SOLUBILISATION-OTHER_ACID_METABOLISM	P-SOLUBILISATION-PHOSPHONATE_DEGRADATION	PGPT0002460-phnL-K05781	0	1	1	2
PGPT0002465	DIRECT_EFFECTS	BIO-FERTILIZATION	PHOSPHATE_SOLUBILIZATION	P-SOLUBILISATION-OTHER_ACID_METABOLISM	P-SOLUBILISATION-PHOSPHONATE_DEGRADATION	PGPT0002465-phnM-K06162	0	2	1	2
PGPT0002470	DIRECT_EFFECTS	BIO-FERTILIZATION	PHOSPHATE_SOLUBILIZATION	P-SOLUBILISATION-OTHER_ACID_METABOLISM	P-SOLUBILISATION-PHOSPHONATE_DEGRADATION	PGPT0002470-phnN-K05774	0	0	2	1
PGPT0002475	DIRECT_EFFECTS	BIO-FERTILIZATION	PHOSPHATE_SOLUBILIZATION	P-SOLUBILISATION-OTHER_ACID_METABOLISM	P-SOLUBILISATION-PHOSPHONATE_DEGRADATION	PGPT0002475-phnO-K09994	0	0	1	1
PGPT0002480	DIRECT_EFFECTS	BIO-FERTILIZATION	PHOSPHATE_SOLUBILIZATION	P-SOLUBILISATION-OTHER_ACID_METABOLISM	P-SOLUBILISATION-PHOSPHONATE_DEGRADATION	PGPT0002480-phnP-K06167	1	0	1	1
PGPT0002485	DIRECT_EFFECTS	BIO-FERTILIZATION	PHOSPHATE_SOLUBILIZATION	P-SOLUBILISATION-OTHER_ACID_METABOLISM	P-SOLUBILISATION-PHOSPHONATE_DEGRADATION# PGPT	PGPT0002485-phnW-K03430	0	1	1	0
PGPT0002495	DIRECT_EFFECTS	BIO-FERTILIZATION	PHOSPHATE_SOLUBILIZATION	P-SOLUBILISATION-OTHER_ACID_METABOLISM	P-SOLUBILISATION-PHOSPHONATE_DEGRADATION	PGPT0002495-phnY-K00206	0	0	1	0
PGPT0002515	DIRECT_EFFECTS	BIO-FERTILIZATION	PHOSPHATE_SOLUBILIZATION	P-SOLUBILISATION-OTHER_ACID_METABOLISM	P-SOLUBILISATION-PHOSPHONATE_DEGRADATION	PGPT0002515-phnF-K02043	1	5	3	1
PGPT0002520	DIRECT_EFFECTS	BIO-FERTILIZATION	PHOSPHATE_SOLUBILIZATION	P-SOLUBILISATION-OTHER_ACID_METABOLISM	P-SOLUBILISATION-PHOSPHONATE_TRANSPORT	PGPT0002520-phnC-K02041	0	1	2	1
PGPT0002525	DIRECT_EFFECTS	BIO-FERTILIZATION	PHOSPHATE_SOLUBILIZATION	P-SOLUBILISATION-OTHER_ACID_METABOLISM	P-SOLUBILISATION-PHOSPHONATE_TRANSPORT	PGPT0002525-phnD-K02044	0	1	2	1
PGPT0002530	DIRECT_EFFECTS	BIO-FERTILIZATION	PHOSPHATE_SOLUBILIZATION	P-SOLUBILISATION-OTHER_ACID_METABOLISM	P-SOLUBILISATION-PHOSPHONATE_TRANSPORT	PGPT0002530-phnE-K02042	0	1	3	1
PGPT0002555	DIRECT_EFFECTS	BIO-FERTILIZATION	PHOSPHATE_SOLUBILIZATION	P-SOLUBILISATION-PHOSPHATASE_ACTIVITY	P-SOLUBILISATION-ACID_PHOSPHATASE# PGPT	PGPT0002555-phoN|phoC-K09474	0	0	1	0
PGPT0002565	DIRECT_EFFECTS	BIO-FERTILIZATION	PHOSPHATE_SOLUBILIZATION	P-SOLUBILISATION-PHOSPHATASE_ACTIVITY	P-SOLUBILISATION-ACID_PHOSPHATASE# PGPT	PGPT0002565-aphA-K03788	0	0	0	3
PGPT0002570	DIRECT_EFFECTS	BIO-FERTILIZATION	PHOSPHATE_SOLUBILIZATION	P-SOLUBILISATION-PHOSPHATASE_ACTIVITY	P-SOLUBILISATION-ALKALINE_PHOSPHATASE# PGPT	PGPT0002570-phoA-K01077	1	0	2	0
PGPT0002575	DIRECT_EFFECTS	BIO-FERTILIZATION	PHOSPHATE_SOLUBILIZATION	P-SOLUBILISATION-PHOSPHATASE_ACTIVITY	P-SOLUBILISATION-ALKALINE_PHOSPHATASE# PGPT	PGPT0002575-phoD-K01113	0	0	1	0
PGPT0002580	DIRECT_EFFECTS	BIO-FERTILIZATION	PHOSPHATE_SOLUBILIZATION	P-SOLUBILISATION-PHOSPHATASE_ACTIVITY	P-SOLUBILISATION-PHYTASE_PRODUCTION	PGPT0002580-phy|phyA|phyB|phyC-K01083	0	0	0	1
PGPT0002585	DIRECT_EFFECTS	BIO-FERTILIZATION	PHOSPHATE_SOLUBILIZATION	P-SOLUBILISATION-PHOSPHATASE_ACTIVITY	P-SOLUBILISATION-PHYTASE_PRODUCTION	PGPT0002585-agpP|agp-K01085	0	0	0	1
PGPT0002595	DIRECT_EFFECTS	BIO-FERTILIZATION	PHOSPHATE_SOLUBILIZATION	P-SOLUBILISATION-PHOSPHATASE_ACTIVITY	P-SOLUBILISATION-EXOPOLYPHOSPHATASE# PGPT	PGPT0002595-ppx|ppx_gppA-K01524	4	2	2	2
PGPT0002600	DIRECT_EFFECTS	BIO-FERTILIZATION	PHOSPHATE_SOLUBILIZATION	P-SOLUBILISATION-PHOSPHATASE_ACTIVITY	P-SOLUBILISATION-INORGANIC_PHOSPHATASE	PGPT0002600-ppa-K01507	1	1	1	0
PGPT0002610	DIRECT_EFFECTS	BIO-FERTILIZATION	PHOSPHATE_SOLUBILIZATION	P-SOLUBILISATION-PHOSPHATE_METABOLISM	P-SOLUBILISATION-PHOSPHATE_TRANSPORT# PGPT	PGPT0002610-pstA-K02038	1	1	1	1
PGPT0002615	DIRECT_EFFECTS	BIO-FERTILIZATION	PHOSPHATE_SOLUBILIZATION	P-SOLUBILISATION-PHOSPHATE_METABOLISM	P-SOLUBILISATION-PHOSPHATE_TRANSPORT# PGPT	PGPT0002615-pstB|phoT-K02036	1	1	1	2
PGPT0002620	DIRECT_EFFECTS	BIO-FERTILIZATION	PHOSPHATE_SOLUBILIZATION	P-SOLUBILISATION-PHOSPHATE_METABOLISM	P-SOLUBILISATION-PHOSPHATE_TRANSPORT# PGPT	PGPT0002620-pstC|phoW-K02037	0	1	1	1
PGPT0002625	DIRECT_EFFECTS	BIO-FERTILIZATION	PHOSPHATE_SOLUBILIZATION	P-SOLUBILISATION-PHOSPHATE_METABOLISM	P-SOLUBILISATION-PHOSPHATE_TRANSPORT# PGPT	PGPT0002625-pstS|phoS-K02040	1	1	1	1
PGPT0002630	DIRECT_EFFECTS	BIO-FERTILIZATION	PHOSPHATE_SOLUBILIZATION	P-SOLUBILISATION-PHOSPHATE_METABOLISM	P-SOLUBILISATION-PHOSPHATE_TRANSPORT# PGPT	PGPT0002630-phoU|phoY-K02039	1	2	1	2
PGPT0002635	DIRECT_EFFECTS	BIO-FERTILIZATION	PHOSPHATE_SOLUBILIZATION	P-SOLUBILISATION-PHOSPHATE_METABOLISM	P-SOLUBILISATION-PHOSPHATE_TRANSPORT	PGPT0002635-phoE-K11929	0	0	0	3
PGPT0002645	DIRECT_EFFECTS	BIO-FERTILIZATION	PHOSPHATE_SOLUBILIZATION	P-SOLUBILISATION-PHOSPHATE_METABOLISM	P-SOLUBILISATION-PHOSPHATE_TRANSPORT# PGPT	PGPT0002645-pitA|pit-K16322	0	0	0	1
PGPT0002650	DIRECT_EFFECTS	BIO-FERTILIZATION	PHOSPHATE_SOLUBILIZATION	P-SOLUBILISATION-PHOSPHATE_METABOLISM	P-SOLUBILISATION-PHOSPHATE_TRANSPORT# PGPT	PGPT0002650-yjbB-K03324	0	1	2	2
PGPT0002655	DIRECT_EFFECTS	BIO-FERTILIZATION	PHOSPHATE_SOLUBILIZATION	P-SOLUBILISATION-PHOSPHATE_METABOLISM	P-SOLUBILISATION-PHOSPHATE_TRANSPORT	PGPT0002655-TC_PIT-K03306	1	1	0	0
PGPT0002660	DIRECT_EFFECTS	BIO-FERTILIZATION	PHOSPHATE_SOLUBILIZATION	P-SOLUBILISATION-PHOSPHATE_METABOLISM	P-SOLUBILISATION-PHOSPAHTE_HOMEOSTASIS|REGULATION# PGPT	PGPT0002660-phoB-K07657	0	2	2	1
PGPT0002665	DIRECT_EFFECTS	BIO-FERTILIZATION	PHOSPHATE_SOLUBILIZATION	P-SOLUBILISATION-PHOSPHATE_METABOLISM	P-SOLUBILISATION-PHOSPAHTE_HOMEOSTASIS|REGULATION# PGPT	PGPT0002665-phoP|phoB1-K07658	1	0	0	0
PGPT0002670	DIRECT_EFFECTS	BIO-FERTILIZATION	PHOSPHATE_SOLUBILIZATION	P-SOLUBILISATION-PHOSPHATE_METABOLISM	P-SOLUBILISATION-PHOSPAHTE_HOMEOSTASIS|REGULATION	PGPT0002670-senX3-K07768	1	1	0	0
PGPT0002675	DIRECT_EFFECTS	BIO-FERTILIZATION	PHOSPHATE_SOLUBILIZATION	P-SOLUBILISATION-PHOSPHATE_METABOLISM	P-SOLUBILISATION-PHOSPAHTE_HOMEOSTASIS|REGULATION	PGPT0002675-regX3-K07776	3	1	0	0
PGPT0002685	DIRECT_EFFECTS	BIO-FERTILIZATION	PHOSPHATE_SOLUBILIZATION	P-SOLUBILISATION-PHOSPHATE_METABOLISM	P-SOLUBILISATION-PHOSPAHTE_HOMEOSTASIS|REGULATION	PGPT0002685-ppk-K00937	2	1	1	1
PGPT0002690	DIRECT_EFFECTS	BIO-FERTILIZATION	PHOSPHATE_SOLUBILIZATION	P-SOLUBILISATION-PHOSPHATE_METABOLISM	P-SOLUBILISATION-PHOSPAHTE_HOMEOSTASIS|REGULATION	PGPT0002690-ppk2-K22468	0	2	1	0
PGPT0002695	DIRECT_EFFECTS	BIO-FERTILIZATION	PHOSPHATE_SOLUBILIZATION	P-SOLUBILISATION-PHOSPHATE_METABOLISM	P-SOLUBILISATION-PHOSPAHTE_HOMEOSTASIS|REGULATION	PGPT0002695-ppk2-K23753	1	1	0	0
PGPT0002700	DIRECT_EFFECTS	BIO-FERTILIZATION	PHOSPHATE_SOLUBILIZATION	P-SOLUBILISATION-PHOSPHATE_METABOLISM	P-SOLUBILISATION-PHOSPAHTE_HOMEOSTASIS|REGULATION# PGPT	PGPT0002700-phoH-K06217	3	2	1	3
PGPT0002705	DIRECT_EFFECTS	BIO-FERTILIZATION	PHOSPHATE_SOLUBILIZATION	P-SOLUBILISATION-PHOSPHATE_METABOLISM	P-SOLUBILISATION-PHOSPAHTE_HOMEOSTASIS|REGULATION	PGPT0002705-phoR-K07636	1	1	1	1
PGPT0002710	DIRECT_EFFECTS	BIO-FERTILIZATION	POTASSIUM_SOLUBILIZATION	K-SOLUBILIZATION-POTASSIUM_TRANSPORT	K-SOLUBILIZATION-TRK-UPTAKE_SYSTEM# PGPT	PGPT0002710-trkA|ktrA-K03499	2	0	0	0
PGPT0002715	DIRECT_EFFECTS	BIO-FERTILIZATION	POTASSIUM_SOLUBILIZATION	K-SOLUBILIZATION-POTASSIUM_TRANSPORT	K-SOLUBILIZATION-TRK-UPTAKE_SYSTEM# PGPT	PGPT0002715-kch|trkA|mthK|pch-K10716	1	1	1	0
PGPT0002720	DIRECT_EFFECTS	BIO-FERTILIZATION	POTASSIUM_SOLUBILIZATION	K-SOLUBILIZATION-POTASSIUM_TRANSPORT	K-SOLUBILIZATION-TRK-UPTAKE_SYSTEM# PGPT	PGPT0002720-trkD|kup-K03549	1	1	1	2
PGPT0002725	DIRECT_EFFECTS	BIO-FERTILIZATION	POTASSIUM_SOLUBILIZATION	K-SOLUBILIZATION-POTASSIUM_TRANSPORT	K-SOLUBILIZATION-TRK-UPTAKE_SYSTEM# PGPT	PGPT0002725-trkE|sapD-K19229	0	0	0	1
PGPT0002735	DIRECT_EFFECTS	BIO-FERTILIZATION	POTASSIUM_SOLUBILIZATION	K-SOLUBILIZATION-POTASSIUM_TRANSPORT	K-SOLUBILIZATION-TRK-UPTAKE_SYSTEM# PGPT	PGPT0002735-trkG|trkH|ktrB-K03498	0	0	0	2
PGPT0002740	DIRECT_EFFECTS	BIO-FERTILIZATION	POTASSIUM_SOLUBILIZATION	K-SOLUBILIZATION-POTASSIUM_TRANSPORT	K-SOLUBILIZATION-KDP-UPTAKE_SYSTEM# PGPT	PGPT0002740-kdpA-K01546	0	1	1	1
PGPT0002745	DIRECT_EFFECTS	BIO-FERTILIZATION	POTASSIUM_SOLUBILIZATION	K-SOLUBILIZATION-POTASSIUM_TRANSPORT	K-SOLUBILIZATION-KDP-UPTAKE_SYSTEM# PGPT	PGPT0002745-kdpB-K01547	0	1	1	2
PGPT0002750	DIRECT_EFFECTS	BIO-FERTILIZATION	POTASSIUM_SOLUBILIZATION	K-SOLUBILIZATION-POTASSIUM_TRANSPORT	K-SOLUBILIZATION-KDP-UPTAKE_SYSTEM# PGPT	PGPT0002750-kdpC-K01548	0	1	1	1
PGPT0002755	DIRECT_EFFECTS	BIO-FERTILIZATION	POTASSIUM_SOLUBILIZATION	K-SOLUBILIZATION-POTASSIUM_TRANSPORT	K-SOLUBILIZATION-KDP-UPTAKE_SYSTEM# PGPT	PGPT0002755-kdpD-K07646	0	1	2	1
PGPT0002760	DIRECT_EFFECTS	BIO-FERTILIZATION	POTASSIUM_SOLUBILIZATION	K-SOLUBILIZATION-POTASSIUM_TRANSPORT	K-SOLUBILIZATION-KDP-UPTAKE_SYSTEM# PGPT	PGPT0002760-kdpE-K07667	0	1	1	0
PGPT0002765	DIRECT_EFFECTS	BIO-FERTILIZATION	POTASSIUM_SOLUBILIZATION	K-SOLUBILIZATION-POTASSIUM_TRANSPORT	K-SOLUBILIZATION-KDP-UPTAKE_SYSTEM# PGPT	PGPT0002765-kdpF-K01545	0	0	1	0
PGPT0002780	DIRECT_EFFECTS	BIO-FERTILIZATION	SULFUR_ASSIMILATION|MINERALIZATION	S-ASSSIMILATION-SULFUR_METABOLISM	S-METABOLISM-SULFATE_REDUCTION# PGPT	PGPT0002780-cysC-K00860	0	0	0	2
PGPT0002785	DIRECT_EFFECTS	BIO-FERTILIZATION	SULFUR_ASSIMILATION|MINERALIZATION	S-ASSSIMILATION-SULFUR_METABOLISM	S-METABOLISM-SULFATE_REDUCTION# PGPT	PGPT0002785-cysH-K00390	1	2	2	2
PGPT0002790	DIRECT_EFFECTS	BIO-FERTILIZATION	SULFUR_ASSIMILATION|MINERALIZATION	S-ASSSIMILATION-SULFUR_METABOLISM	S-METABOLISM-SULFATE_REDUCTION# PGPT	PGPT0002790-cysI-K00381	0	1	1	3
PGPT0002795	DIRECT_EFFECTS	BIO-FERTILIZATION	SULFUR_ASSIMILATION|MINERALIZATION	S-ASSSIMILATION-SULFUR_METABOLISM	S-METABOLISM-SULFATE_REDUCTION# PGPT	PGPT0002795-cysJ-K00380	0	2	1	3
PGPT0002810	DIRECT_EFFECTS	BIO-FERTILIZATION	SULFUR_ASSIMILATION|MINERALIZATION	S-ASSSIMILATION-SULFUR_METABOLISM	S-METABOLISM-SULFATE_REDUCTION# PGPT	PGPT0002810-cysK-K01738	2	0	4	2
PGPT0002820	DIRECT_EFFECTS	BIO-FERTILIZATION	SULFUR_ASSIMILATION|MINERALIZATION	S-ASSSIMILATION-SULFUR_METABOLISM	S-METABOLISM-SULFATE_REDUCTION# PGPT	PGPT0002820-cysM-K12339	0	1	0	1
PGPT0002825	DIRECT_EFFECTS	BIO-FERTILIZATION	SULFUR_ASSIMILATION|MINERALIZATION	S-ASSSIMILATION-SULFUR_METABOLISM	S-METABOLISM-SULFATE_REDUCTION# PGPT	PGPT0002825-sir-K00392	1	0	0	0
PGPT0002830	DIRECT_EFFECTS	BIO-FERTILIZATION	SULFUR_ASSIMILATION|MINERALIZATION	S-ASSSIMILATION-SULFUR_METABOLISM	S-METABOLISM-SULFONE_DEGRADATION	PGPT0002830-sfnG-K17228	4	0	0	0
PGPT0002860	DIRECT_EFFECTS	BIO-FERTILIZATION	SULFUR_ASSIMILATION|MINERALIZATION	S-ASSSIMILATION-SULFUR_METABOLISM	S-METABOLISM-DMS_DEGRADATION# PGPT	PGPT0002860-dmsA-K07306	0	0	0	4
PGPT0002870	DIRECT_EFFECTS	BIO-FERTILIZATION	SULFUR_ASSIMILATION|MINERALIZATION	S-ASSSIMILATION-SULFUR_METABOLISM	S-METABOLISM-DMS_DEGRADATION# PGPT	PGPT0002870-dmsB-K07307	0	0	0	3
PGPT0002880	DIRECT_EFFECTS	BIO-FERTILIZATION	SULFUR_ASSIMILATION|MINERALIZATION	S-ASSSIMILATION-SULFUR_METABOLISM	S-METABOLISM-DMS_DEGRADATION	PGPT0002880-dmsC-K07308	0	0	0	3
PGPT0002895	DIRECT_EFFECTS	BIO-FERTILIZATION	SULFUR_ASSIMILATION|MINERALIZATION	S-ASSSIMILATION-SULFUR_METABOLISM	S-METABOLISM-DMS_DEGRADATION	PGPT0002895-dmdB-K20034	0	1	1	0
PGPT0002900	DIRECT_EFFECTS	BIO-FERTILIZATION	SULFUR_ASSIMILATION|MINERALIZATION	S-ASSSIMILATION-SULFUR_METABOLISM	S-METABOLISM-DMS_DEGRADATION	PGPT0002900-dmdC-K20035	1	1	0	0
PGPT0002905	DIRECT_EFFECTS	BIO-FERTILIZATION	SULFUR_ASSIMILATION|MINERALIZATION	S-ASSSIMILATION-SULFUR_METABOLISM	S-METABOLISM-DMS_DEGRADATION	PGPT0002905-dmdD-K20036	1	0	0	0
PGPT0002925	DIRECT_EFFECTS	BIO-FERTILIZATION	SULFUR_ASSIMILATION|MINERALIZATION	S-ASSSIMILATION-SULFUR_METABOLISM	S-METABOLISM-THIONATE_DEGRADATION# PGPT	PGPT0002925-ttrR-K13041	0	1	0	0
PGPT0002935	DIRECT_EFFECTS	BIO-FERTILIZATION	SULFUR_ASSIMILATION|MINERALIZATION	S-ASSSIMILATION-SULFUR_METABOLISM	S-METABOLISM-TAURINE_DEGRADATION# PGPT	PGPT0002935-ggt-K00681	1	6	7	2
PGPT0002940	DIRECT_EFFECTS	BIO-FERTILIZATION	SULFUR_ASSIMILATION|MINERALIZATION	S-ASSSIMILATION-SULFUR_METABOLISM	S-METABOLISM-TAURINE_DEGRADATION# PGPT	PGPT0002940-tauD-K03119	1	2	0	1
PGPT0002945	DIRECT_EFFECTS	BIO-FERTILIZATION	SULFUR_ASSIMILATION|MINERALIZATION	S-ASSSIMILATION-SULFUR_METABOLISM	S-METABOLISM-TAURINE_TRANSPORT# PGPT	PGPT0002945-tauA-K15551	0	0	0	1
PGPT0002950	DIRECT_EFFECTS	BIO-FERTILIZATION	SULFUR_ASSIMILATION|MINERALIZATION	S-ASSSIMILATION-SULFUR_METABOLISM	S-METABOLISM-TAURINE_TRANSPORT# PGPT	PGPT0002950-tauB-K15552	0	0	0	1
PGPT0002955	DIRECT_EFFECTS	BIO-FERTILIZATION	SULFUR_ASSIMILATION|MINERALIZATION	S-ASSSIMILATION-SULFUR_METABOLISM	S-METABOLISM-TAURINE_TRANSPORT# PGPT	PGPT0002955-tauC-K10831	0	0	0	1
PGPT0002956	INDIRECT_EFFECTS	COLONIZING_PLANT_SYSTEM	COLONIZATION-PLANT_DERIVED_SUBSTRATE_USAGE	PLANT_DERIVED_ORGANIC_ACID_TRANSPORT	PLANT_DERIVED_SHIKIMATE_TRANSPORT	PGPT0002956-shiA-K08172	0	2	1	2
PGPT0002960	DIRECT_EFFECTS	BIO-FERTILIZATION	SULFUR_ASSIMILATION|MINERALIZATION	S-ASSSIMILATION-SULFUR_METABOLISM	S-METABOLISM-SULFUR_REGULATION# PGPT	PGPT0002960-cbl-K13635	0	1	0	0
PGPT0002965	DIRECT_EFFECTS	BIO-FERTILIZATION	SULFUR_ASSIMILATION|MINERALIZATION	S-ASSSIMILATION-SULFUR_METABOLISM	S-METABOLISM-SULFUR_REGULATION# PGPT	PGPT0002965-cysB-K13634	0	1	0	0
PGPT0002970	DIRECT_EFFECTS	BIO-FERTILIZATION	SULFUR_ASSIMILATION|MINERALIZATION	S-ASSSIMILATION-SULFUR_METABOLISM	S-METABOLISM-SULFUR_REGULATION# PGPT	PGPT0002970-cysE-K23304	0	0	0	1
PGPT0002975	DIRECT_EFFECTS	BIO-FERTILIZATION	SULFUR_ASSIMILATION|MINERALIZATION	S-ASSSIMILATION-SULFUR_METABOLISM	S-METABOLISM-SULFUR_REGULATION# PGPT	PGPT0002975-cysQ-K01082	0	0	1	1
PGPT0002985	DIRECT_EFFECTS	BIO-FERTILIZATION	SULFUR_ASSIMILATION|MINERALIZATION	S-ASSSIMILATION-SULFUR_METABOLISM	S-METABOLISM-SULFUR_REGULATION# PGPT	PGPT0002985-cysS-K01883	2	3	4	2
PGPT0002990	DIRECT_EFFECTS	BIO-FERTILIZATION	SULFUR_ASSIMILATION|MINERALIZATION	S-ASSSIMILATION-SULFUR_METABOLISM	S-METABOLISM-SULFATE_TRANSPORT# PGPT	PGPT0002990-cysA-K02045	1	1	1	1
PGPT0002995	DIRECT_EFFECTS	BIO-FERTILIZATION	SULFUR_ASSIMILATION|MINERALIZATION	S-ASSSIMILATION-SULFUR_METABOLISM	S-METABOLISM-SULFATE_TRANSPORT# PGPT	PGPT0002995-cysP|ylnA-K02048	0	0	0	1
PGPT0003000	DIRECT_EFFECTS	BIO-FERTILIZATION	SULFUR_ASSIMILATION|MINERALIZATION	S-ASSSIMILATION-SULFUR_METABOLISM	S-METABOLISM-SULFATE_TRANSPORT# PGPT	PGPT0003000-cysT|cysU-K02046	1	1	1	1
PGPT0003005	DIRECT_EFFECTS	BIO-FERTILIZATION	SULFUR_ASSIMILATION|MINERALIZATION	S-ASSSIMILATION-SULFUR_METABOLISM	S-METABOLISM-SULFATE_TRANSPORT# PGPT	PGPT0003005-cysW-K02047	1	1	1	1
PGPT0003010	DIRECT_EFFECTS	BIO-FERTILIZATION	SULFUR_ASSIMILATION|MINERALIZATION	S-ASSSIMILATION-SULFUR_METABOLISM	S-METABOLISM-SULFATE_TRANSPORT# PGPT	PGPT0003010-cysZ-K06203	0	1	1	0
PGPT0003015	DIRECT_EFFECTS	BIO-FERTILIZATION	SULFUR_ASSIMILATION|MINERALIZATION	S-ASSSIMILATION-SULFUR_METABOLISM	S-METABOLISM-SULFATE_TRANSPORT# PGPT	PGPT0003015-sbp-K23163	1	1	1	1
PGPT0003020	DIRECT_EFFECTS	BIO-FERTILIZATION	SULFUR_ASSIMILATION|MINERALIZATION	S-ASSSIMILATION-SULFUR_METABOLISM	S-METABOLISM-SULFATE_TRANSPORT# PGPT	PGPT0003020-TC_SULP-K03321	1	2	0	3
PGPT0003021	DIRECT_EFFECTS	BIO-FERTILIZATION	SULFUR_ASSIMILATION|MINERALIZATION	S-ASSSIMILATION-SULFUR_METABOLISM	S-METABOLISM-THIOSULFATE_DEGRADATION	PGPT0003021-glpE-K02439	0	0	0	1
PGPT0003025	DIRECT_EFFECTS	BIO-FERTILIZATION	SULFUR_ASSIMILATION|MINERALIZATION	S-ASSSIMILATION-SULFUR_METABOLISM	S-METABOLISM-ALKANESULFONATE_TRANSPORT	PGPT0003025-ssuA-K15553	0	4	1	0
PGPT0003030	DIRECT_EFFECTS	BIO-FERTILIZATION	SULFUR_ASSIMILATION|MINERALIZATION	S-ASSSIMILATION-SULFUR_METABOLISM	S-METABOLISM-ALKANESULFONATE_TRANSPORT	PGPT0003030-ssuB-K15554	0	1	1	0
PGPT0003035	DIRECT_EFFECTS	BIO-FERTILIZATION	SULFUR_ASSIMILATION|MINERALIZATION	S-ASSSIMILATION-SULFUR_METABOLISM	S-METABOLISM-ALKANESULFONATE_TRANSPORT	PGPT0003035-ssuC-K15555	0	1	1	1
PGPT0003040	DIRECT_EFFECTS	BIO-FERTILIZATION	SULFUR_ASSIMILATION|MINERALIZATION	S-ASSSIMILATION-SULFUR_METABOLISM	S-METABOLISM-ALKANESULFONATE_DEGRADATION	PGPT0003040-ssuD-K04091	3	6	1	0
PGPT0003045	DIRECT_EFFECTS	BIO-FERTILIZATION	SULFUR_ASSIMILATION|MINERALIZATION	S-ASSSIMILATION-SULFUR_METABOLISM	S-METABOLISM-ALKANESULFONATE_DEGRADATION# PGPT	PGPT0003045-ssuE-K00299	1	1	0	1
PGPT0003049	DIRECT_EFFECTS	BIO-FERTILIZATION	IRON_ACQUISITION	IRON_ACQUISITION-SIDEROPHORES	SIDEROPHORES-PYOCHELIN|YERSINIBACTIN_TRANSPORT# PGPT	PGPT0003049-fptC-NA	0	1	0	0
PGPT0003065	DIRECT_EFFECTS	BIO-FERTILIZATION	IRON_ACQUISITION	IRON_ACQUISITION-SIDEROPHORES	SIDEROPHORES-PYOCHELIN|PSEUDOMONINE_BIOSYNTHESIS# PGPT	PGPT0003065-pchB|pmsB-K04782	0	0	1	1
PGPT0003165	DIRECT_EFFECTS	BIO-FERTILIZATION	IRON_ACQUISITION	IRON_ACQUISITION-SIDEROPHORES	SIDEROPHORES-BACILLIBACTIN_METABOLISM# PGPT	PGPT0003165-dhbF-K04780	0	0	1	0
PGPT0003170	DIRECT_EFFECTS	BIO-FERTILIZATION	IRON_ACQUISITION	IRON_ACQUISITION-SIDEROPHORES	SIDEROPHORES-BACILLIBACTIN_METABOLISM# PGPT	PGPT0003170-btr|ybbB-K21701	0	1	0	0
PGPT0003180	DIRECT_EFFECTS	BIO-FERTILIZATION	IRON_ACQUISITION	IRON_ACQUISITION-SIDEROPHORES	SIDEROPHORES-BACILLIBACTIN_METABOLISM# PGPT	PGPT0003180-ymfI|fabG|efpI-K00059	7	18	20	3
PGPT0003185	DIRECT_EFFECTS	BIO-FERTILIZATION	IRON_ACQUISITION	IRON_ACQUISITION-SIDEROPHORES	SIDEROPHORES-BACILLIBACTIN_TRANSPORT# PGPT	PGPT0003185-blt-K08153	0	1	0	1
PGPT0003200	DIRECT_EFFECTS	BIO-FERTILIZATION	IRON_ACQUISITION	IRON_ACQUISITION-SIDEROPHORES	SIDEROPHORES-COPROGEN_BIOSYNTHESIS# PGPT	PGPT0003200-hemN|hemZ-K02495	1	2	1	3
PGPT0003205	DIRECT_EFFECTS	BIO-FERTILIZATION	IRON_ACQUISITION	IRON_ACQUISITION-SIDEROPHORES	SIDEROPHORES-COPROGEN_BIOSYNTHESIS# PGPT	PGPT0003205-hemF-K00228	0	1	1	2
PGPT0003210	DIRECT_EFFECTS	BIO-FERTILIZATION	IRON_ACQUISITION	IRON_ACQUISITION-SIDEROPHORES	SIDEROPHORES-ENTEROBACTIN|ENTEROCHELIN|BACILLIBACTIN|VANCHROBACTIN|ACINETOBACTIN|CHRYSOBACTIN_METABOLISM# PGPT	PGPT0003210-entA|vibA|viuA|vabA|angA|dhbA|cbsA|aebA-K00216	1	0	0	1
PGPT0003215	DIRECT_EFFECTS	BIO-FERTILIZATION	IRON_ACQUISITION	IRON_ACQUISITION-SIDEROPHORES	SIDEROPHORES-ENTEROBACTIN|ENTEROCHELIN|BACILLIBACTIN|VANCHROBACTIN|ACINETOBACTIN|CHRYSOBACTIN_METABOLISM# PGPT	PGPT0003215-entB|vibB|viuB|vabB|angB|dhbB|basF|cbsB|aebB-K01252	0	0	0	1
PGPT0003220	DIRECT_EFFECTS	BIO-FERTILIZATION	IRON_ACQUISITION	IRON_ACQUISITION-SIDEROPHORES	SIDEROPHORES-ENTEROBACTIN|ENTEROCHELIN|BACILLIBACTIN|VANCHROBACTIN|ACINETOBACTIN|CHRYSOBACTIN_METABOLISM# PGPT	PGPT0003220-entC|vibC|viuB|angC|vabC|dhbC|basJ|cbsE|aebC-K02361	0	0	0	2
PGPT0003230	DIRECT_EFFECTS	BIO-FERTILIZATION	IRON_ACQUISITION	IRON_ACQUISITION-SIDEROPHORES	SIDEROPHORES-ENTEROBACTIN|ENTEROCHELIN_METABOLISM# PGPT	PGPT0003230-entF|aebF-K02364	0	0	0	2
PGPT0003231	DIRECT_EFFECTS	BIO-FERTILIZATION	IRON_ACQUISITION	IRON_ACQUISITION-SIDEROPHORES	SIDEROPHORES-ENTEROBACTIN|ENTEROCHELIN_METABOLISM# PGPT	PGPT0003231-entH|ydbB-K24147	0	0	0	2
PGPT0003235	DIRECT_EFFECTS	BIO-FERTILIZATION	IRON_ACQUISITION	IRON_ACQUISITION-SIDEROPHORES	SIDEROPHORES-ENTEROBACTIN|ENTEROCHELIN_METABOLISM# PGPT	PGPT0003235-fes|cbsF|cbsH-K07214	0	0	0	2
PGPT0003240	DIRECT_EFFECTS	BIO-FERTILIZATION	IRON_ACQUISITION	IRON_ACQUISITION-SIDEROPHORES	SIDEROPHORES-ENTEROBACTIN|ENTEROCHELIN_METABOLISM# PGPT	PGPT0003240-pfeE-K23722	0	0	1	0
PGPT0003255	DIRECT_EFFECTS	BIO-FERTILIZATION	IRON_ACQUISITION	IRON_ACQUISITION-SIDEROPHORES	SIDEROPHORES-ENTEROBACTIN|ENTEROCHELIN_METABOLISM# PGPT	PGPT0003255-acrR|smeT-K03577	1	4	1	0
PGPT0003260							0	0	0	2
PGPT0003270	DIRECT_EFFECTS	BIO-FERTILIZATION	IRON_ACQUISITION	IRON_ACQUISITION-SIDEROPHORES	SIDEROPHORES-ENTEROBACTIN|ENTEROCHELIN|PSEUDOMONINE|BACILLIBACTIN|ACINETOBACTIN|ANGUIBACTIN_METABOLISM# PGPT	PGPT0003270-entE|psmE|dhbE|basE|angE|aebE-K02363	0	0	0	3
PGPT0003275	DIRECT_EFFECTS	BIO-FERTILIZATION	IRON_ACQUISITION	IRON_ACQUISITION-SIDEROPHORES	SIDEROPHORES-ENTEROBACTIN|ENTEROCHELIN_TRANSPORT# PGPT	PGPT0003275-acrA|lir|mtcA|mexA|adeI|smeD|mtrC|cmeA-K03585	0	4	3	2
PGPT0003280	DIRECT_EFFECTS	BIO-FERTILIZATION	IRON_ACQUISITION	IRON_ACQUISITION-SIDEROPHORES	SIDEROPHORES-ENTEROBACTIN|ENTEROCHELIN_TRANSPORT# PGPT	PGPT0003280-acrB|acrE|mexB|adeJ|smeE|mtrD|cmeB-K18138	0	3	1	7
PGPT0003285	DIRECT_EFFECTS	BIO-FERTILIZATION	IRON_ACQUISITION	IRON_ACQUISITION-SIDEROPHORES	SIDEROPHORES-ENTEROBACTIN|ENTEROCHELIN_TRANSPORT# PGPT	PGPT0003285-acrD|yffA-K18324	0	0	0	2
PGPT0003290	DIRECT_EFFECTS	BIO-FERTILIZATION	IRON_ACQUISITION	IRON_ACQUISITION-SIDEROPHORES	SIDEROPHORES-ENTEROBACTIN|ENTEROCHELIN_TRANSPORT# PGPT	PGPT0003290-entS|ybdA|cbsS-K08225	1	2	1	1
PGPT0003295	DIRECT_EFFECTS	BIO-FERTILIZATION	IRON_ACQUISITION	IRON_ACQUISITION-SIDEROPHORES	SIDEROPHORES-ENTEROBACTIN|ENTEROCHELIN|CHRYSEOBACTIN_TRANSPORT# PGPT	PGPT0003295-fepC|yusV|cbuC-K23188	0	0	0	1
PGPT0003300	DIRECT_EFFECTS	BIO-FERTILIZATION	IRON_ACQUISITION	IRON_ACQUISITION-SIDEROPHORES	SIDEROPHORES-ENTEROBACTIN|ENTEROCHELIN|CHRYSEOBACTIN_TRANSPORT# PGPT	PGPT0003300-fepD|febD|cbuD-K23186	0	0	0	1
PGPT0003305	DIRECT_EFFECTS	BIO-FERTILIZATION	IRON_ACQUISITION	IRON_ACQUISITION-SIDEROPHORES	SIDEROPHORES-ENTEROBACTIN|ENTEROCHELIN|CHRYSEOBACTIN_TRANSPORT# PGPT	PGPT0003305-fepG|cbuG-K23187	0	0	0	1
PGPT0003310	DIRECT_EFFECTS	BIO-FERTILIZATION	IRON_ACQUISITION	IRON_ACQUISITION-SIDEROPHORES	SIDEROPHORES-ENTEROBACTIN|ENTEROCHELIN|DESFERRIOXAMINE|CHRYSEOBACTIN_TRANSPORT# PGPT	PGPT0003310-fepB|cbuB-K23185	0	1	1	1
PGPT0003320	DIRECT_EFFECTS	BIO-FERTILIZATION	IRON_ACQUISITION	IRON_ACQUISITION-SIDEROPHORES	SIDEROPHORES-FERRICHROME|FERRIOXAMINE_TRANSPORT# PGPT	PGPT0003320-fhuB-K23228	0	0	0	1
PGPT0003403	DIRECT_EFFECTS	BIO-FERTILIZATION	IRON_ACQUISITION	IRON_ACQUISITION-SIDEROPHORES	SIDEROPHORES-RHIZOBACTIN_METABOLISM# PGPT	PGPT0003403-rhbC-NA	0	0	0	1
PGPT0003407	DIRECT_EFFECTS	BIO-FERTILIZATION	IRON_ACQUISITION	IRON_ACQUISITION-SIDEROPHORES	SIDEROPHORES-RHIZOBACTIN_METABOLISM# PGPT	PGPT0003407-rhbF-NA	0	0	0	2
PGPT0003409	DIRECT_EFFECTS	BIO-FERTILIZATION	IRON_ACQUISITION	IRON_ACQUISITION-SIDEROPHORES	SIDEROPHORES-RHIZOBACTIN_METABOLISM# PGPT	PGPT0003409-rhrA-NA	0	0	1	0
PGPT0003415	DIRECT_EFFECTS	BIO-FERTILIZATION	IRON_ACQUISITION	IRON_ACQUISITION-SIDEROPHORES	SIDEROPHORES-SALMOCHELIN_TRANSPORT# PGPT	PGPT0003415-fepA|pfeA|iroN|pirA-K19611	0	0	0	1
PGPT0003435	DIRECT_EFFECTS	BIO-FERTILIZATION	IRON_ACQUISITION	IRON_ACQUISITION-SIDEROPHORES	SIDEROPHORES-STAPHYLOFERRIN_A_TRANSPORT# PGPT	PGPT0003435-sfaA|sfnaA-K23448	1	0	0	1
PGPT0003530	DIRECT_EFFECTS	BIO-FERTILIZATION	IRON_ACQUISITION	IRON_ACQUISITION-SIDEROPHORES	SIDEROPHORES-YERSINIABACTIN_TRANSPORT# PGPT	PGPT0003530-irp8|ybtX-K05373	0	0	1	0
PGPT0003580	DIRECT_EFFECTS	BIO-FERTILIZATION	IRON_ACQUISITION	IRON_ACQUISITION-SIDEROPHORES	SIDEROPHORE_EXPORT_SYSTEMS# PGPT	PGPT0003580-ymfE-K08221	1	0	0	0
PGPT0003585	DIRECT_EFFECTS	BIO-FERTILIZATION	IRON_ACQUISITION	IRON_ACQUISITION-SIDEROPHORES	SIDEROPHORE_EXPORT_SYSTEMS# PGPT	PGPT0003585-mdtA-K07799	0	1	1	0
PGPT0003590	DIRECT_EFFECTS	BIO-FERTILIZATION	IRON_ACQUISITION	IRON_ACQUISITION-SIDEROPHORES	SIDEROPHORE_EXPORT_SYSTEMS# PGPT	PGPT0003590-mdtB-K07788	0	1	0	1
PGPT0003595	DIRECT_EFFECTS	BIO-FERTILIZATION	IRON_ACQUISITION	IRON_ACQUISITION-SIDEROPHORES	SIDEROPHORE_EXPORT_SYSTEMS# PGPT	PGPT0003595-mdtC-K07789	0	1	0	2
PGPT0003600	DIRECT_EFFECTS	BIO-FERTILIZATION	IRON_ACQUISITION	IRON_ACQUISITION-SIDEROPHORES	SIDEROPHORE_EXPORT_SYSTEMS# PGPT	PGPT0003600-tolC-K12340	0	3	2	1
PGPT0003615	DIRECT_EFFECTS	BIO-FERTILIZATION	IRON_ACQUISITION	IRON_ACQUISITION-HEMOPHORES	HEMOPHORES-HEME|HEMIN_UTILISATION# PGPT	PGPT0003615-hugZ|hutZ|chuZ-K07226	0	0	1	0
PGPT0003646	DIRECT_EFFECTS	BIO-FERTILIZATION	IRON_ACQUISITION	IRON_ACQUISITION-HEMOPHORES	HEMOPHORES-HEME|HEMIN_TRANSPORT# PGPT	PGPT0003646-hemS-NA	0	0	1	0
PGPT0003648	DIRECT_EFFECTS	BIO-FERTILIZATION	IRON_ACQUISITION	IRON_ACQUISITION-HEMOPHORES	HEMOPHORES-HEME|HEMIN_TRANSPORT# PGPT	PGPT0003648-hxuB-NA	0	1	0	0
PGPT0003650	DIRECT_EFFECTS	BIO-FERTILIZATION	IRON_ACQUISITION	IRON_ACQUISITION-HEMOPHORES	HEMOPHORES-SIROHEME# PGPT	PGPT0003650-hemA-K02492	1	1	0	2
PGPT0003655	DIRECT_EFFECTS	BIO-FERTILIZATION	IRON_ACQUISITION	IRON_ACQUISITION-HEMOPHORES	HEMOPHORES-SIROHEME# PGPT	PGPT0003655-hemB-K01698	1	2	2	2
PGPT0003660	DIRECT_EFFECTS	BIO-FERTILIZATION	IRON_ACQUISITION	IRON_ACQUISITION-HEMOPHORES	HEMOPHORES-SIROHEME# PGPT	PGPT0003660-hemC-K01749	1	1	1	0
PGPT0003665	DIRECT_EFFECTS	BIO-FERTILIZATION	IRON_ACQUISITION	IRON_ACQUISITION-HEMOPHORES	HEMOPHORES-SIROHEME# PGPT	PGPT0003665-hemD-K01719	0	0	1	0
PGPT0003670	DIRECT_EFFECTS	BIO-FERTILIZATION	IRON_ACQUISITION	IRON_ACQUISITION-HEMOPHORES	HEMOPHORES-SIROHEME# PGPT	PGPT0003670-cobA_hemD-K13542	1	0	0	0
PGPT0003675	DIRECT_EFFECTS	BIO-FERTILIZATION	IRON_ACQUISITION	IRON_ACQUISITION-HEMOPHORES	HEMOPHORES-SIROHEME# PGPT	PGPT0003675-hemDX-K13543	0	1	0	0
PGPT0003680	DIRECT_EFFECTS	BIO-FERTILIZATION	IRON_ACQUISITION	IRON_ACQUISITION-HEMOPHORES	HEMOPHORES-SIROHEME# PGPT	PGPT0003680-hemL-K01845	1	1	1	1
PGPT0003685	DIRECT_EFFECTS	BIO-FERTILIZATION	IRON_ACQUISITION	IRON_ACQUISITION-HEMOPHORES	HEMOPHORES-SIROHEME# PGPT	PGPT0003685-sirA|ylnD|cysG|cobA-K02303	0	1	0	0
PGPT0003690	DIRECT_EFFECTS	BIO-FERTILIZATION	IRON_ACQUISITION	IRON_ACQUISITION-HEMOPHORES	HEMOPHORES-SIROHEME# PGPT	PGPT0003690-cysG-K02302	1	0	1	3
PGPT0003695	DIRECT_EFFECTS	BIO-FERTILIZATION	IRON_ACQUISITION	IRON_ACQUISITION-OTHER_TRANSPORT_SYSTEMS	IRON_TRANSPORT-IRON_II_TRANSPORT_SYSTEM# PGPT	PGPT0003695-feoA-K04758	0	1	0	0
PGPT0003700	DIRECT_EFFECTS	BIO-FERTILIZATION	IRON_ACQUISITION	IRON_ACQUISITION-OTHER_TRANSPORT_SYSTEMS	IRON_TRANSPORT-IRON_II_TRANSPORT_SYSTEM# PGPT	PGPT0003700-feoB-K04759	2	3	1	2
PGPT0003710	DIRECT_EFFECTS	BIO-FERTILIZATION	IRON_ACQUISITION	IRON_ACQUISITION-OTHER_TRANSPORT_SYSTEMS	IRON_TRANSPORT-IRON_II_TRANSPORT_SYSTEM# PGPT	PGPT0003710-efeU|FTR|FTH1-K07243	1	0	1	1
PGPT0003715	DIRECT_EFFECTS	BIO-FERTILIZATION	IRON_ACQUISITION	IRON_ACQUISITION-OTHER_TRANSPORT_SYSTEMS	IRON_TRANSPORT-IRON_II_TRANSPORT_SYSTEM# PGPT	PGPT0003715-efeO-K07224	1	0	1	1
PGPT0003720	DIRECT_EFFECTS	BIO-FERTILIZATION	IRON_ACQUISITION	IRON_ACQUISITION-OTHER_TRANSPORT_SYSTEMS	IRON_TRANSPORT-IRON_II_TRANSPORT_SYSTEM# PGPT	PGPT0003720-efeB-K16301	1	0	1	3
PGPT0003725	DIRECT_EFFECTS	BIO-FERTILIZATION	IRON_ACQUISITION	IRON_ACQUISITION-OTHER_TRANSPORT_SYSTEMS	IRON_TRANSPORT-IRON_III_TRANSPORT_SYSTEM# PGPT	PGPT0003725-afuA|fbpA-K02012	0	1	7	0
PGPT0003730	DIRECT_EFFECTS	BIO-FERTILIZATION	IRON_ACQUISITION	IRON_ACQUISITION-OTHER_TRANSPORT_SYSTEMS	IRON_TRANSPORT-IRON_III_TRANSPORT_SYSTEM# PGPT	PGPT0003730-afuB|fbpB-K02011	0	0	6	0
PGPT0003735	DIRECT_EFFECTS	BIO-FERTILIZATION	IRON_ACQUISITION	IRON_ACQUISITION-OTHER_TRANSPORT_SYSTEMS	IRON_TRANSPORT-IRON_III_TRANSPORT_SYSTEM# PGPT	PGPT0003735-afuC|fbpC-K02010	0	0	5	0
PGPT0003740	DIRECT_EFFECTS	BIO-FERTILIZATION	IRON_ACQUISITION	IRON_ACQUISITION-OTHER_TRANSPORT_SYSTEMS	IRON_TRANSPORT-VITAMIN_B12_RELATED_FERROUS_UPTAKE# PGPT	PGPT0003740-butB-K16092	0	1	1	2
PGPT0003745	DIRECT_EFFECTS	BIO-FERTILIZATION	IRON_ACQUISITION	IRON_ACQUISITION-OTHER_TRANSPORT_SYSTEMS	IRON_TRANSPORT-VITAMIN_B12_RELATED_FERROUS_UPTAKE# PGPT	PGPT0003745-tonB-K03832	0	4	2	0
PGPT0003750	DIRECT_EFFECTS	BIO-FERTILIZATION	IRON_ACQUISITION	IRON_ACQUISITION-OTHER_TRANSPORT_SYSTEMS	IRON_TRANSPORT-VITAMIN_B12_RELATED_FERROUS_UPTAKE# PGPT	PGPT0003750-exbB-K03561	0	3	2	2
PGPT0003755	DIRECT_EFFECTS	BIO-FERTILIZATION	IRON_ACQUISITION	IRON_ACQUISITION-OTHER_TRANSPORT_SYSTEMS	IRON_TRANSPORT-VITAMIN_B12_RELATED_FERROUS_UPTAKE# PGPT	PGPT0003755-exbD-K03559	0	3	2	2
PGPT0003760	DIRECT_EFFECTS	BIO-FERTILIZATION	IRON_ACQUISITION	IRON_ACQUISITION-OTHER_TRANSPORT_SYSTEMS	IRON_TRANSPORT-FeuABC|YusV-TRANSPORT_COMPLEX# PGPT	PGPT0003760-yusV|ABC_FEV_A|feuD-K02013	5	3	5	3
PGPT0003765	DIRECT_EFFECTS	BIO-FERTILIZATION	IRON_ACQUISITION	IRON_ACQUISITION-OTHER_TRANSPORT_SYSTEMS	IRON_TRANSPORT-FeuABC|YusV-TRANSPORT_COMPLEX# PGPT	PGPT0003765-feuA|yvrC|ABC_FEV_S|fatB-K02016	2	3	5	1
PGPT0003770	DIRECT_EFFECTS	BIO-FERTILIZATION	IRON_ACQUISITION	IRON_ACQUISITION-OTHER_TRANSPORT_SYSTEMS	IRON_TRANSPORT-FeuABC|YusV-TRANSPORT_COMPLEX# PGPT	PGPT0003770-feuB|feuC|chuU|yfhA|hmuU|ABC_FEV_P|fatC|fatD-K02015	2	1	4	1
PGPT0003780	DIRECT_EFFECTS	BIO-FERTILIZATION	IRON_ACQUISITION	IRON_ACQUISITION-OTHER_TRANSPORT_SYSTEMS	IRON_TRANSPORT-IRON_COMPLEX_RECEPTOR# PGPT	PGPT0003780-TC_FEV_OM2|cirA|cfrA|hmuR-K16089	0	0	0	1
PGPT0003785	DIRECT_EFFECTS	BIO-FERTILIZATION	IRON_ACQUISITION	IRON_ACQUISITION-OTHER_TRANSPORT_SYSTEMS	IRON_TRANSPORT-IRON_COMPLEX_RECEPTOR# PGPT	PGPT0003785-TC_FEV_OM3|tbpA|hemR|lbpA|hpuB|bhuR|hugA|hmbR-K16087	0	0	2	2
PGPT0003790	DIRECT_EFFECTS	BIO-FERTILIZATION	IRON_ACQUISITION	IRON_ACQUISITION-OTHER_TRANSPORT_SYSTEMS	IRON_TRANSPORT-IRON_COMPLEX_RECEPTOR# PGPT	PGPT0003790-hutA|fatA|fct|foxR-K02014	0	6	4	3
PGPT0003831	DIRECT_EFFECTS	BIO-REMEDIATION	HEAVY_METAL_DETOXIFICATION	HEAVY_METAL_ZINK_RESISTANCE	ZINK_RESISTANCE-ZINK|IRON-TRANSPORT	PGPT0003831-fieF-K13283	0	1	2	2
PGPT0003866	DIRECT_EFFECTS	BIO-REMEDIATION	HEAVY_METAL_DETOXIFICATION	HEAVY_METAL_MANGANESE_RESISTANCE	MANGANESE_RESISTANCE-REALTED_PROTEIN	PGPT0003866-yceF-NA	0	1	2	0
PGPT0003875	DIRECT_EFFECTS	BIO-FERTILIZATION	IRON_ACQUISITION	IRON_ACQUISITION-OTHER_TRANSPORT_SYSTEMS	IRON_TRANSPORT-OTHER_IRON_BINDING_PROTEINS# PGPT	PGPT0003875-fiu|bfrD-K16090	0	8	1	0
PGPT0003880	DIRECT_EFFECTS	BIO-FERTILIZATION	IRON_ACQUISITION	IRON_ACQUISITION-OTHER_TRANSPORT_SYSTEMS	IRON_ACQUISITION-IRON_UPTAKE_REGULATION# PGPT	PGPT0003880-fur|furB|zur-K03711	2	3	1	2
PGPT0003885	DIRECT_EFFECTS	BIO-FERTILIZATION	IRON_ACQUISITION	IRON_ACQUISITION-OTHER_TRANSPORT_SYSTEMS	IRON_ACQUISITION-IRON_UPTAKE_REGULATION# PGPT	PGPT0003885-irr|perP-K09826	0	0	1	0
PGPT0003890	DIRECT_EFFECTS	BIO-FERTILIZATION	IRON_ACQUISITION	IRON_ACQUISITION-OTHER_TRANSPORT_SYSTEMS	IRON_ACQUISITION-IRON_UPTAKE_REGULATION# PGPT	PGPT0003890-troR-K03709	1	0	0	0
PGPT0003895	DIRECT_EFFECTS	BIO-FERTILIZATION	IRON_ACQUISITION	IRON_ACQUISITION-OTHER_TRANSPORT_SYSTEMS	IRON_ACQUISITION-IRON_UPTAKE_REGULATION# PGPT	PGPT0003895-mntR|dtxR|ideR|sirR|troR-K11924	0	0	0	1
PGPT0003905	DIRECT_EFFECTS	BIO-FERTILIZATION	IRON_ACQUISITION	IRON_ACQUISITION-OTHER_TRANSPORT_SYSTEMS	IRON_ACQUISITION-IRON_UPTAKE_REGULATION# PGPT	PGPT0003905-zur-K09823	0	0	1	0
PGPT0003906	INDIRECT_EFFECTS	COMPETITIVE_EXCLUSION|CE	CE-BACTERIAL_FITNESS	CE-BACTERIAL_FITNESS-MULTIDRUG_RESISTANCE	CE-BACTERIAL_FITNESS-MULTUDRUG_RELATED_REGULATION	PGPT0003906-rarD-K05786	1	2	0	1
PGPT0003907	INDIRECT_EFFECTS	COMPETITIVE_EXCLUSION|CE	CE-BACTERIAL_FITNESS	CE-BACTERIAL_FITNESS-MULTIDRUG_RESISTANCE	CE-BACTERIAL_FITNESS-MULTUDRUG_RELATED_REGULATION	PGPT0003907-bmrR-NA	2	0	0	0
PGPT0003915	DIRECT_EFFECTS	BIO-FERTILIZATION	IRON_ACQUISITION	IRON_ACQUISITION-OTHER_TRANSPORT_SYSTEMS	IRON_ACQUISITION-IRON_UPTAKE_REGULATION# PGPT	PGPT0003915-pmrA-K07666	0	2	0	1
PGPT0003920	DIRECT_EFFECTS	BIO-FERTILIZATION	IRON_ACQUISITION	IRON_ACQUISITION-OTHER_TRANSPORT_SYSTEMS	IRON_ACQUISITION-IRON_UPTAKE_REGULATION# PGPT	PGPT0003920-pmrB-K07645	0	1	1	2
PGPT0003925	DIRECT_EFFECTS	BIO-FERTILIZATION	IRON_ACQUISITION	IRON_ACQUISITION-OTHER_TRANSPORT_SYSTEMS	IRON_ACQUISITION-LIPOIC_ACID_CHELATORS# PGPT	PGPT0003925-lipB-K03801	1	1	1	0
PGPT0003935	DIRECT_EFFECTS	BIO-FERTILIZATION	IRON_ACQUISITION	IRON_ACQUISITION-OTHER_TRANSPORT_SYSTEMS	IRON_ACQUISITION-LIPOIC_ACID_CHELATORS# PGPT	PGPT0003935-lipA-K03644	1	1	1	1
PGPT0003965	DIRECT_EFFECTS	BIO-FERTILIZATION	IRON_ACQUISITION	IRON_ACQUISITION-OTHER_TRANSPORT_SYSTEMS	IRON_ACQUISITION-RELATED_PROTEINS_FERRITIN# PGPT	PGPT0003965-bfr-K03594	0	1	1	0
PGPT0003976	DIRECT_EFFECTS	BIO-FERTILIZATION	IRON_ACQUISITION	IRON_ACQUISITION-OTHER_TRANSPORT_SYSTEMS	IRON_ACQUISITION-BACTERIOFERRITIN-ASSOCIATED_FERREDOXIN# PGPT	PGPT0003976-yfhL-NA	0	1	0	2
PGPT0003985	DIRECT_EFFECTS	BIO-FERTILIZATION	IRON_ACQUISITION	IRON_ACQUISITION-OTHER_TRANSPORT_SYSTEMS	IRON_ACQUISITION-RELATED_PROTEINS-BaeSR_SYSTEM# PGPT	PGPT0003985-baeS-K07642	2	0	0	1
PGPT0003990	DIRECT_EFFECTS	BIO-FERTILIZATION	IRON_ACQUISITION	IRON_ACQUISITION-OTHER_TRANSPORT_SYSTEMS	IRON_ACQUISITION-RELATED_PROTEINS-BaeSR_SYSTEM# PGPT	PGPT0003990-baeR-K07664	0	0	0	2
PGPT0003995	DIRECT_EFFECTS	BIO-FERTILIZATION	IRON_ACQUISITION	IRON_ACQUISITION-OTHER_TRANSPORT_SYSTEMS	IRON_ACQUISITION-RELATED_PROTEINS-BaeSR_SYSTEM# PGPT	PGPT0003995-arnB|pmrH-K07806	0	1	0	0
PGPT0004005	DIRECT_EFFECTS	BIO-FERTILIZATION	IRON_ACQUISITION	IRON_ACQUISITION-IRON_HOMOEOSTASIS	IRON_HOMEOSTASIS-OTHER_CYTOCHROME-RELATED_PROTEINS# PGPT	PGPT0004005-cycA|cycM-K08738	0	5	2	0
PGPT0004015	DIRECT_EFFECTS	BIO-FERTILIZATION	IRON_ACQUISITION	IRON_ACQUISITION-IRON_HOMOEOSTASIS	IRON_HOMEOSTASIS-Fmn|Dmk|Ppl|Ndh|Eet_SYSTEM# PGPT	PGPT0004015-fmnA|ecfT-K16785	1	0	0	0
PGPT0004020	DIRECT_EFFECTS	BIO-FERTILIZATION	IRON_ACQUISITION	IRON_ACQUISITION-IRON_HOMOEOSTASIS	IRON_HOMEOSTASIS-Fmn|Dmk|Ppl|Ndh|Eet_SYSTEM# PGPT	PGPT0004020-ndh-K03885	5	2	0	1
PGPT0004025	DIRECT_EFFECTS	BIO-FERTILIZATION	IRON_ACQUISITION	IRON_ACQUISITION-IRON_HOMOEOSTASIS	IRON_HOMEOSTASIS-FoxABCD# PGPT	PGPT0004025-foxA|coxA|ctaD-K02274	3	5	5	2
PGPT0004030	DIRECT_EFFECTS	BIO-FERTILIZATION	IRON_ACQUISITION	IRON_ACQUISITION-IRON_HOMOEOSTASIS	IRON_HOMEOSTASIS-FoxABCD# PGPT	PGPT0004030-foxB|coxB|ctaC-K02275	1	7	2	1
PGPT0004035	DIRECT_EFFECTS	BIO-FERTILIZATION	IRON_ACQUISITION	IRON_ACQUISITION-IRON_HOMOEOSTASIS	IRON_HOMEOSTASIS-FoxABCD# PGPT	PGPT0004035-coxC|ctaE-K02276	1	7	5	2
PGPT0004040	DIRECT_EFFECTS	BIO-FERTILIZATION	IRON_ACQUISITION	IRON_ACQUISITION-IRON_HOMOEOSTASIS	IRON_HOMEOSTASIS-FoxABCD# PGPT	PGPT0004040-coxD|ctaF-K02277	0	2	0	1
PGPT0004045	DIRECT_EFFECTS	BIO-FERTILIZATION	IRON_ACQUISITION	IRON_ACQUISITION-IRON_HOMOEOSTASIS	IRON_HOMEOSTASIS-RELATED_PROTEINS# PGPT	PGPT0004045-ygjH-K07229	1	1	0	1
PGPT0004050	DIRECT_EFFECTS	BIO-FERTILIZATION	IRON_ACQUISITION	IRON_ACQUISITION-IRON_HOMOEOSTASIS	IRON_HOMEOSTASIS-RELATED_PROTEINS# PGPT	PGPT0004050-cyaY-K06202	0	1	0	2
PGPT0004055	DIRECT_EFFECTS	BIO-FERTILIZATION	IRON_ACQUISITION	IRON_ACQUISITION-IRON_HOMOEOSTASIS	IRON_HOMEOSTASIS-RELATED_PROTEINS# PGPT	PGPT0004055-dps|dpsA-K04047	0	1	1	2
PGPT0004060	DIRECT_EFFECTS	BIO-REMEDIATION	HEAVY_METAL_DETOXIFICATION	HEAVY_METAL_COPPER_RESISTANCE	COPPER_RESISTANCE-COPPER_TRANSPORT# PGPT	PGPT0004060-cusA|silA-K07787	0	0	0	2
PGPT0004065	DIRECT_EFFECTS	BIO-REMEDIATION	HEAVY_METAL_DETOXIFICATION	HEAVY_METAL_COPPER_RESISTANCE	COPPER_RESISTANCE-COPPER_TRANSPORT# PGPT	PGPT0004065-cusB|silB-K07798	0	0	0	1
PGPT0004070	DIRECT_EFFECTS	BIO-REMEDIATION	HEAVY_METAL_DETOXIFICATION	HEAVY_METAL_COPPER_RESISTANCE	COPPER_RESISTANCE-COPPER_TRANSPORT# PGPT	PGPT0004070-cusC|silC-K07796	0	0	0	1
PGPT0004075	DIRECT_EFFECTS	BIO-REMEDIATION	HEAVY_METAL_DETOXIFICATION	HEAVY_METAL_COPPER_RESISTANCE	COPPER_RESISTANCE-COPPER_TRANSPORT# PGPT	PGPT0004075-cusF-K07810	0	1	0	1
PGPT0004080	DIRECT_EFFECTS	BIO-REMEDIATION	HEAVY_METAL_DETOXIFICATION	HEAVY_METAL_COPPER_RESISTANCE	COPPER_RESISTANCE-COPPER_TRANSPORT# PGPT	PGPT0004080-cutA-K03926	0	1	0	1
PGPT0004085	DIRECT_EFFECTS	BIO-REMEDIATION	HEAVY_METAL_DETOXIFICATION	HEAVY_METAL_COPPER_RESISTANCE	COPPER_RESISTANCE-COPPER_TRANSPORT	PGPT0004085-cutC-K06201	0	0	0	1
PGPT0004090	DIRECT_EFFECTS	BIO-REMEDIATION	HEAVY_METAL_DETOXIFICATION	HEAVY_METAL_COPPER_RESISTANCE	COPPER_RESISTANCE-COPPER_TRANSPORT	PGPT0004090-copA|ctpA-K17686	1	2	5	1
PGPT0004095	DIRECT_EFFECTS	BIO-REMEDIATION	HEAVY_METAL_DETOXIFICATION	HEAVY_METAL_COPPER_RESISTANCE	COPPER_RESISTANCE-COPPER_TRANSPORT	PGPT0004095-ycnJ-K14166	1	1	0	0
PGPT0004100	DIRECT_EFFECTS	BIO-REMEDIATION	HEAVY_METAL_DETOXIFICATION	HEAVY_METAL_COPPER_RESISTANCE	COPPER_RESISTANCE_MEDIATION# PGPT	PGPT0004100-cusS|copS|silS-K02484	3	5	1	1
PGPT0004105	DIRECT_EFFECTS	BIO-REMEDIATION	HEAVY_METAL_DETOXIFICATION	HEAVY_METAL_COPPER_RESISTANCE	COPPER_RESISTANCE_MEDIATION# PGPT	PGPT0004105-cusR|copR|silR-K07665	1	2	1	2
PGPT0004106	DIRECT_EFFECTS	BIO-REMEDIATION	HEAVY_METAL_DETOXIFICATION	HEAVY_METAL_COPPER_RESISTANCE	COPPER_RESISTANCE_MEDIATION	PGPT0004106-pcoA-NA	0	1	0	1
PGPT0004110	DIRECT_EFFECTS	BIO-REMEDIATION	HEAVY_METAL_DETOXIFICATION	HEAVY_METAL_COPPER_RESISTANCE	COPPER_RESISTANCE_MEDIATION	PGPT0004110-pcoB|copB-K07233	0	0	0	1
PGPT0004115	DIRECT_EFFECTS	BIO-REMEDIATION	HEAVY_METAL_DETOXIFICATION	HEAVY_METAL_COPPER_RESISTANCE	COPPER_RESISTANCE_MEDIATION	PGPT0004115-pcoC|copC-K07156	0	0	1	1
PGPT0004120	DIRECT_EFFECTS	BIO-REMEDIATION	HEAVY_METAL_DETOXIFICATION	HEAVY_METAL_COPPER_RESISTANCE	COPPER_RESISTANCE_MEDIATION	PGPT0004120-pcoD|copD-K07245	0	0	0	1
PGPT0004125	DIRECT_EFFECTS	BIO-REMEDIATION	HEAVY_METAL_DETOXIFICATION	HEAVY_METAL_COPPER_RESISTANCE	COPPER_RESISTANCE_MEDIATION	PGPT0004125-ATOX1|ATX1|copZ|golB-K07213	1	1	1	0
PGPT0004130	DIRECT_EFFECTS	BIO-REMEDIATION	HEAVY_METAL_DETOXIFICATION	HEAVY_METAL_COPPER_RESISTANCE	COPPER_RESISTANCE_MEDIATION# PGPT	PGPT0004130-cueO-K14588	0	0	0	4
PGPT0004135	DIRECT_EFFECTS	BIO-REMEDIATION	HEAVY_METAL_DETOXIFICATION	HEAVY_METAL_COPPER_RESISTANCE	COPPER_RESISTANCE_MEDIATION# PGPT	PGPT0004135-cueR-K19591	1	2	2	1
PGPT0004136	DIRECT_EFFECTS	BIO-REMEDIATION	HEAVY_METAL_DETOXIFICATION	HEAVY_METAL_COPPER_RESISTANCE	COPPER_RESISTANCE_MEDIATION	PGPT0004136-comR|ycfQ-K22041	0	1	2	1
PGPT0004140	DIRECT_EFFECTS	BIO-REMEDIATION	HEAVY_METAL_DETOXIFICATION	HEAVY_METAL_COPPER_RESISTANCE	COPPER_RESISTANCE_MEDIATION# PGPT	PGPT0004140-cutF|nlpE-K06079	0	0	0	1
PGPT0004151	DIRECT_EFFECTS	BIO-REMEDIATION	HEAVY_METAL_DETOXIFICATION	HEAVY_METAL_GOLD_RESISTANCE	GOLD_RESISTANCE-DELFTIBACTIN_METABOLISM	PGPT0004151-delftibactin_hydrolase_domain_protein-NA	1	1	0	0
PGPT0004160	DIRECT_EFFECTS	BIO-REMEDIATION	HEAVY_METAL_DETOXIFICATION	HEAVY_METAL_COPPER_RESISTANCE	COPPER_RESISTANCE_MEDIATION	PGPT0004160-mmcO-K22552	0	0	1	0
PGPT0004175	DIRECT_EFFECTS	BIO-REMEDIATION	HEAVY_METAL_DETOXIFICATION	HEAVY_METAL_COPPER_RESISTANCE	COPPER_RESISTANCE-RELATED_FUNCTIONS	PGPT0004175-csoR|ricR-K21600	1	0	1	0
PGPT0004180	DIRECT_EFFECTS	BIO-REMEDIATION	HEAVY_METAL_DETOXIFICATION	HEAVY_METAL_SILVER_RESISTANCE	SILVER_RESISTANCE-SILVER_TRANSPORT	PGPT0004180-silP-K23254	0	0	0	1
PGPT0004186	DIRECT_EFFECTS	BIO-REMEDIATION	HEAVY_METAL_DETOXIFICATION	HEAVY_METAL_CHROMATE_RESISTANCE	CHROMATE_RESISTANCE-CHR_TRANSPORT_SYSTEM# PGPT	PGPT0004186-chrB-NA	0	0	1	0
PGPT0004190	DIRECT_EFFECTS	BIO-REMEDIATION	HEAVY_METAL_DETOXIFICATION	HEAVY_METAL_CHROMATE_RESISTANCE	CHROMATE_RESISTANCE-CHR_TRANSPORT_SYSTEM# PGPT	PGPT0004190-chrC|sodB|sodA-K04564	0	1	2	1
PGPT0004193	DIRECT_EFFECTS	BIO-REMEDIATION	HEAVY_METAL_DETOXIFICATION	HEAVY_METAL_CHROMATE_RESISTANCE	CHROMATE_RESISTANCE-CHR_TRANSPORT_SYSTEM	PGPT0004193-chrI-NA	0	1	0	0
PGPT0004195	DIRECT_EFFECTS	BIO-REMEDIATION	HEAVY_METAL_DETOXIFICATION	HEAVY_METAL_CHROMATE_RESISTANCE	CHROMATE_RESISTANCE-CHR_TRANSPORT_SYSTEM# PGPT	PGPT0004195-chrR-K19784	1	1	1	1
PGPT0004200	DIRECT_EFFECTS	BIO-REMEDIATION	HEAVY_METAL_DETOXIFICATION	HEAVY_METAL_ZINK_RESISTANCE	ZINK_RESISTANCE-ZNT_TRANSPORT_SYSTEM# PGPT	PGPT0004200-zntA|cadA-K01534	0	1	2	3
PGPT0004205	DIRECT_EFFECTS	BIO-REMEDIATION	HEAVY_METAL_DETOXIFICATION	HEAVY_METAL_ZINK_RESISTANCE	ZINK_RESISTANCE-ZNT_TRANSPORT_SYSTEM	PGPT0004205-zntB-K16074	0	1	1	0
PGPT0004215	DIRECT_EFFECTS	BIO-REMEDIATION	HEAVY_METAL_DETOXIFICATION	HEAVY_METAL_ZINK_RESISTANCE	ZINK_RESISTANCE-ZNT_TRANSPORT_SYSTEM	PGPT0004215-zntR-K13638	1	1	0	0
PGPT0004220	DIRECT_EFFECTS	BIO-REMEDIATION	HEAVY_METAL_DETOXIFICATION	HEAVY_METAL_ZINK_RESISTANCE	ZINK_RESISTANCE-ZNU_TRANSPORT_SYSTEM# PGPT	PGPT0004220-znuA-K09815	1	0	0	1
PGPT0004225	DIRECT_EFFECTS	BIO-REMEDIATION	HEAVY_METAL_DETOXIFICATION	HEAVY_METAL_ZINK_RESISTANCE	ZINK_RESISTANCE-ZNU_TRANSPORT_SYSTEM	PGPT0004225-znuB-K09816	1	0	0	0
PGPT0004230	DIRECT_EFFECTS	BIO-REMEDIATION	HEAVY_METAL_DETOXIFICATION	HEAVY_METAL_ZINK_RESISTANCE	ZINK_RESISTANCE-ZNU_TRANSPORT_SYSTEM	PGPT0004230-znuC-K09817	1	0	0	1
PGPT0004255	DIRECT_EFFECTS	BIO-REMEDIATION	HEAVY_METAL_DETOXIFICATION	HEAVY_METAL_ZINK_RESISTANCE	ZINK_RESISTANCE-ZINK-NICKEL_TRANSPORT# PGPT	PGPT0004255-czcD|zitB|yrdO-K16264	1	2	1	0
PGPT0004260	DIRECT_EFFECTS	BIO-REMEDIATION	HEAVY_METAL_DETOXIFICATION	HEAVY_METAL_ZINK_RESISTANCE	ZINK_RESISTANCE-ZINK-NICKEL_TRANSPORT# PGPT	PGPT0004260-zipB-K16267	0	1	0	0
PGPT0004265	DIRECT_EFFECTS	BIO-REMEDIATION	HEAVY_METAL_DETOXIFICATION	HEAVY_METAL_ZINK_RESISTANCE	ZINK_RESISTANCE-ZINK-NICKEL_TRANSPORT# PGPT	PGPT0004265-ABC_ZM_A-K02074	0	0	1	1
PGPT0004270	DIRECT_EFFECTS	BIO-REMEDIATION	HEAVY_METAL_DETOXIFICATION	HEAVY_METAL_ZINK_RESISTANCE	ZINK_RESISTANCE-ZINK-NICKEL_TRANSPORT# PGPT	PGPT0004270-ABC_ZM_P-K02075	0	0	1	2
PGPT0004275	DIRECT_EFFECTS	BIO-REMEDIATION	HEAVY_METAL_DETOXIFICATION	HEAVY_METAL_ZINK_RESISTANCE	ZINK_RESISTANCE-ZINK-NICKEL_TRANSPORT# PGPT	PGPT0004275-ABC_ZM_S-K02077	0	0	1	2
PGPT0004288	DIRECT_EFFECTS	BIO-REMEDIATION	HEAVY_METAL_DETOXIFICATION	HEAVY_METAL_LEAD_RESISTANCE	LEAD_RESISTANCE-LEAD_HOMEOSTASIS	PGPT0004288-pbrR-NA	0	1	0	0
PGPT0004310	DIRECT_EFFECTS	BIO-REMEDIATION	HEAVY_METAL_DETOXIFICATION	HEAVY_METAL_ZINK_RESISTANCE	ZINK_RESISTANCE-ZINK_HOMEOSTASIS	PGPT0004310-zraS|hydH-K07709	0	1	0	0
PGPT0004315	DIRECT_EFFECTS	BIO-REMEDIATION	HEAVY_METAL_DETOXIFICATION	HEAVY_METAL_ZINK_RESISTANCE	ZINK_RESISTANCE-ZINK_HOMEOSTASIS	PGPT0004315-zraR|hydG-K07713	0	3	0	0
PGPT0004320	DIRECT_EFFECTS	BIO-REMEDIATION	HEAVY_METAL_DETOXIFICATION	HEAVY_METAL_MANGANESE_RESISTANCE	MANGANESE_RESISTANCE-SIT-ABC_TRANSPORT_SYSTEM# PGPT	PGPT0004320-sitA-K11604	0	0	0	1
PGPT0004325	DIRECT_EFFECTS	BIO-REMEDIATION	HEAVY_METAL_DETOXIFICATION	HEAVY_METAL_MANGANESE_RESISTANCE	MANGANESE_RESISTANCE-SIT-ABC_TRANSPORT_SYSTEM# PGPT	PGPT0004325-sitB-K11607	0	0	0	1
PGPT0004330	DIRECT_EFFECTS	BIO-REMEDIATION	HEAVY_METAL_DETOXIFICATION	HEAVY_METAL_MANGANESE_RESISTANCE	MANGANESE_RESISTANCE-SIT-ABC_TRANSPORT_SYSTEM# PGPT	PGPT0004330-sitC-K11605	0	0	0	1
PGPT0004335	DIRECT_EFFECTS	BIO-REMEDIATION	HEAVY_METAL_DETOXIFICATION	HEAVY_METAL_MANGANESE_RESISTANCE	MANGANESE_RESISTANCE-SIT-ABC_TRANSPORT_SYSTEM# PGPT	PGPT0004335-sitD-K11606	0	0	0	1
PGPT0004370	DIRECT_EFFECTS	BIO-REMEDIATION	HEAVY_METAL_DETOXIFICATION	HEAVY_METAL_MANGANESE_RESISTANCE	MANGANESE_RESISTANCE-MNT_TRANSPORT_SYSTEM	PGPT0004370-mntH-K03322	0	1	1	0
PGPT0004390	DIRECT_EFFECTS	BIO-REMEDIATION	HEAVY_METAL_DETOXIFICATION	HEAVY_METAL_CADMIUM_RESISTANCE	CADMIUM_RESISTANCE-CADMIUM_HOMEOSTASIS# PGPT	PGPT0004390-cmtR-K21885	1	1	1	0
PGPT0004430	DIRECT_EFFECTS	BIO-REMEDIATION	HEAVY_METAL_DETOXIFICATION	HEAVY_METAL_NICKEL_RESISTANCE	NICKEL_RESISTANCE-DDP_TRANSPORT_SYSTEM# PGPT	PGPT0004430-ddpA|ABC_PE_S-K02035	2	3	29	2
PGPT0004435	DIRECT_EFFECTS	BIO-REMEDIATION	HEAVY_METAL_DETOXIFICATION	HEAVY_METAL_NICKEL_RESISTANCE	NICKEL_RESISTANCE-DDP_TRANSPORT_SYSTEM# PGPT	PGPT0004435-ddpD-K02031	2	2	10	0
PGPT0004440	DIRECT_EFFECTS	BIO-REMEDIATION	HEAVY_METAL_DETOXIFICATION	HEAVY_METAL_NICKEL_RESISTANCE	NICKEL_RESISTANCE-DDP_TRANSPORT_SYSTEM# PGPT	PGPT0004440-ddpF-K02032	1	2	4	0
PGPT0004445	DIRECT_EFFECTS	BIO-REMEDIATION	HEAVY_METAL_DETOXIFICATION	HEAVY_METAL_NICKEL_RESISTANCE	NICKEL_RESISTANCE-DDP_TRANSPORT_SYSTEM# PGPT	PGPT0004445-ddpB|appB-K02033	1	2	16	1
PGPT0004450	DIRECT_EFFECTS	BIO-REMEDIATION	HEAVY_METAL_DETOXIFICATION	HEAVY_METAL_NICKEL_RESISTANCE	NICKEL_RESISTANCE-DDP_TRANSPORT_SYSTEM# PGPT	PGPT0004450-ddpC|appC-K02034	0	2	17	1
PGPT0004500	DIRECT_EFFECTS	BIO-REMEDIATION	HEAVY_METAL_DETOXIFICATION	HEAVY_METAL_NICKEL_RESISTANCE	NICKEL_RESISTANCE-NICKEL_TRANSPORT# PGPT	PGPT0004500-dppA-K12368	0	0	2	2
PGPT0004505	DIRECT_EFFECTS	BIO-REMEDIATION	HEAVY_METAL_DETOXIFICATION	HEAVY_METAL_NICKEL_RESISTANCE	NICKEL_RESISTANCE-NICKEL_TRANSPORT# PGPT	PGPT0004505-dppB-K12369	0	0	1	1
PGPT0004510	DIRECT_EFFECTS	BIO-REMEDIATION	HEAVY_METAL_DETOXIFICATION	HEAVY_METAL_NICKEL_RESISTANCE	NICKEL_RESISTANCE-NICKEL_TRANSPORT# PGPT	PGPT0004510-dppC-K12370	0	0	1	2
PGPT0004515	DIRECT_EFFECTS	BIO-REMEDIATION	HEAVY_METAL_DETOXIFICATION	HEAVY_METAL_NICKEL_RESISTANCE	NICKEL_RESISTANCE-NICKEL_TRANSPORT# PGPT	PGPT0004515-dppD-K12371	0	0	1	2
PGPT0004520	DIRECT_EFFECTS	BIO-REMEDIATION	HEAVY_METAL_DETOXIFICATION	HEAVY_METAL_NICKEL_RESISTANCE	NICKEL_RESISTANCE-NICKEL_TRANSPORT# PGPT	PGPT0004520-dppF-K12372	0	0	1	2
PGPT0004545	DIRECT_EFFECTS	BIO-REMEDIATION	HEAVY_METAL_DETOXIFICATION	HEAVY_METAL_NICKEL_RESISTANCE	NICKEL_RESISTANCE-NICKEL_TRANSPORT	PGPT0004545-hoxN|nixA-K07241	1	0	0	0
PGPT0004550	DIRECT_EFFECTS	BIO-REMEDIATION	HEAVY_METAL_DETOXIFICATION	HEAVY_METAL_NICKEL_RESISTANCE	NICKEL_RESISTANCE-NICKEL_TRANSPORT# PGPT	PGPT0004550-rcnA-K08970	0	0	2	2
PGPT0004560	DIRECT_EFFECTS	BIO-REMEDIATION	HEAVY_METAL_DETOXIFICATION	HEAVY_METAL_NICKEL_RESISTANCE	NICKEL_RESISTANCE-NICKEL_HOMEOSTASIS# PGPT	PGPT0004560-rcnB-K23243	0	0	0	1
PGPT0004575	DIRECT_EFFECTS	BIO-REMEDIATION	HEAVY_METAL_DETOXIFICATION	HEAVY_METAL_COBALT_RESISTANCE	COBALT_RESISTANCE-COBALT_HOMEOSTASIS# PGPT	PGPT0004575-rhnA_cobC-K22316	1	0	0	0
PGPT0004580	DIRECT_EFFECTS	BIO-REMEDIATION	HEAVY_METAL_DETOXIFICATION	HEAVY_METAL_COBALT_RESISTANCE	COBALT_RESISTANCE-COBALT_HOMEOSTASIS# PGPT	PGPT0004580-cobQ|cbiP-K02232	0	1	2	0
PGPT0004585	DIRECT_EFFECTS	BIO-REMEDIATION	HEAVY_METAL_DETOXIFICATION	HEAVY_METAL_COBALT_RESISTANCE	COBALT_RESISTANCE-COBALT_HOMEOSTASIS# PGPT	PGPT0004585-cobP|cobU-K02231	1	1	1	0
PGPT0004590	DIRECT_EFFECTS	BIO-REMEDIATION	HEAVY_METAL_DETOXIFICATION	HEAVY_METAL_COBALT_RESISTANCE	COBALT_RESISTANCE-COBALT_HOMEOSTASIS# PGPT	PGPT0004590-cobS|cobV-K02233	1	1	1	0
PGPT0004595	DIRECT_EFFECTS	BIO-REMEDIATION	HEAVY_METAL_DETOXIFICATION	HEAVY_METAL_COBALT_RESISTANCE	COBALT_RESISTANCE-COBALT_HOMEOSTASIS# PGPT	PGPT0004595-cobU|cobT-K00768	1	1	1	0
PGPT0004605	DIRECT_EFFECTS	BIO-REMEDIATION	HEAVY_METAL_DETOXIFICATION	HEAVY_METAL_COBALT_RESISTANCE	COBALT_RESISTANCE-COBALT_HOMEOSTASIS# PGPT	PGPT0004605-cbiA-K02224	0	1	1	0
PGPT0004610	DIRECT_EFFECTS	BIO-REMEDIATION	HEAVY_METAL_DETOXIFICATION	HEAVY_METAL_COBALT_RESISTANCE	COBALT_RESISTANCE-COBALT_HOMEOSTASIS# PGPT	PGPT0004610-cbiC-K06042	0	0	1	0
PGPT0004625	DIRECT_EFFECTS	BIO-REMEDIATION	HEAVY_METAL_DETOXIFICATION	HEAVY_METAL_COBALT_RESISTANCE	COBALT_RESISTANCE-COBALT_HOMEOSTASIS# PGPT	PGPT0004625-cbiF-K05936	0	0	1	0
PGPT0004630	DIRECT_EFFECTS	BIO-REMEDIATION	HEAVY_METAL_DETOXIFICATION	HEAVY_METAL_COBALT_RESISTANCE	COBALT_RESISTANCE-COBALT_HOMEOSTASIS# PGPT	PGPT0004630-cbiG-K02189	0	0	1	0
PGPT0004635	DIRECT_EFFECTS	BIO-REMEDIATION	HEAVY_METAL_DETOXIFICATION	HEAVY_METAL_COBALT_RESISTANCE	COBALT_RESISTANCE-COBALT_HOMEOSTASIS# PGPT	PGPT0004635-cbiH-K05934	0	0	1	0
PGPT0004640	DIRECT_EFFECTS	BIO-REMEDIATION	HEAVY_METAL_DETOXIFICATION	HEAVY_METAL_COBALT_RESISTANCE	COBALT_RESISTANCE-COBALT_HOMEOSTASIS# PGPT	PGPT0004640-cbiJ-K05895	0	0	1	0
PGPT0004645	DIRECT_EFFECTS	BIO-REMEDIATION	HEAVY_METAL_DETOXIFICATION	HEAVY_METAL_COBALT_RESISTANCE	COBALT_RESISTANCE-COBALT_HOMEOSTASIS# PGPT	PGPT0004645-cobA|btuR-K19221	0	1	1	0
PGPT0004650	DIRECT_EFFECTS	BIO-REMEDIATION	HEAVY_METAL_DETOXIFICATION	HEAVY_METAL_COBALT_RESISTANCE	COBALT_RESISTANCE-COBALT_HOMEOSTASIS# PGPT	PGPT0004650-cobC|phpB-K02226	1	1	1	0
PGPT0004655	DIRECT_EFFECTS	BIO-REMEDIATION	HEAVY_METAL_DETOXIFICATION	HEAVY_METAL_COBALT_RESISTANCE	COBALT_RESISTANCE-COBALT_HOMEOSTASIS# PGPT	PGPT0004655-cobC1|cobC-K02225	0	1	1	0
PGPT0004660	DIRECT_EFFECTS	BIO-REMEDIATION	HEAVY_METAL_DETOXIFICATION	HEAVY_METAL_COBALT_RESISTANCE	COBALT_RESISTANCE-COBALT_HOMEOSTASIS# PGPT	PGPT0004660-cbiB|cobD-K02227	0	2	1	0
PGPT0004665	DIRECT_EFFECTS	BIO-REMEDIATION	HEAVY_METAL_DETOXIFICATION	HEAVY_METAL_COBALT_RESISTANCE	COBALT_RESISTANCE-RELATED_ROTEINS	PGPT0004665-apaG-K06195	0	1	1	1
PGPT0004685	DIRECT_EFFECTS	BIO-REMEDIATION	HEAVY_METAL_DETOXIFICATION	HEAVY_METAL_COBALT_RESISTANCE	COBALT_RESISTANCE-VITAMIN_B12_RELATED_TRANSPORT# PGPT	PGPT0004685-btuF-K06858	0	0	0	1
PGPT0004690	DIRECT_EFFECTS	BIO-REMEDIATION	HEAVY_METAL_DETOXIFICATION	HEAVY_METAL_COBALT_RESISTANCE	COBALT_RESISTANCE-CBI_TRANSPORT_SYSTEM# PGPT	PGPT0004690-cbiL-K03394	0	0	1	0
PGPT0004695	DIRECT_EFFECTS	BIO-REMEDIATION	HEAVY_METAL_DETOXIFICATION	HEAVY_METAL_COBALT_RESISTANCE	COBALT_RESISTANCE-COBALT_TRANSPORT# PGPT	PGPT0004695-corC-K06189	2	3	2	4
PGPT0004700	DIRECT_EFFECTS	BIO-REMEDIATION	HEAVY_METAL_DETOXIFICATION	HEAVY_METAL_ARSENIC_RESISTANCE	ARSENIC_RESISTANCE_SYSTEM# PGPT	PGPT0004700-arsA-K01551	3	0	0	0
PGPT0004705	DIRECT_EFFECTS	BIO-REMEDIATION	HEAVY_METAL_DETOXIFICATION	HEAVY_METAL_ARSENIC_RESISTANCE	ARSENIC_RESISTANCE_SYSTEM# PGPT	PGPT0004705-arsB|arsenite_transporter-K03325	0	1	0	0
PGPT0004710	DIRECT_EFFECTS	BIO-REMEDIATION	HEAVY_METAL_DETOXIFICATION	HEAVY_METAL_ARSENIC_RESISTANCE	ARSENIC_RESISTANCE_SYSTEM# PGPT	PGPT0004710-arsB|arsenical_pump_membrane_protein-K03893	1	1	0	0
PGPT0004715	DIRECT_EFFECTS	BIO-REMEDIATION	HEAVY_METAL_DETOXIFICATION	HEAVY_METAL_ARSENIC_RESISTANCE	ARSENIC_RESISTANCE_SYSTEM# PGPT	PGPT0004715-arsC-K03741	1	2	0	0
PGPT0004720	DIRECT_EFFECTS	BIO-REMEDIATION	HEAVY_METAL_DETOXIFICATION	HEAVY_METAL_ARSENIC_RESISTANCE	ARSENIC_RESISTANCE_SYSTEM# PGPT	PGPT0004720-arsC1-K00537	0	1	0	0
PGPT0004735	DIRECT_EFFECTS	BIO-REMEDIATION	HEAVY_METAL_DETOXIFICATION	HEAVY_METAL_ARSENIC_RESISTANCE	ARSENIC_RESISTANCE_SYSTEM# PGPT	PGPT0004735-arsR-K03892	2	3	4	0
PGPT0004740	DIRECT_EFFECTS	BIO-REMEDIATION	HEAVY_METAL_DETOXIFICATION	HEAVY_METAL_ARSENIC_RESISTANCE	ARSENIC_RESISTANCE-ARSENITE_OXIDASE_SYSTEM_AOX# PGPT	PGPT0004740-aoxA|aioB-K08355	1	0	0	0
PGPT0004750	DIRECT_EFFECTS	BIO-REMEDIATION	HEAVY_METAL_DETOXIFICATION	HEAVY_METAL_ARSENIC_RESISTANCE	ARSENIC_RESISTANCE-ARSENITE_OXIDASE_SYSTEM_AOX# PGPT	PGPT0004750-aoxS-K20974	0	2	1	0
PGPT0004755	DIRECT_EFFECTS	BIO-REMEDIATION	HEAVY_METAL_DETOXIFICATION	HEAVY_METAL_ARSENIC_RESISTANCE	ARSENIC_RESISTANCE-ARSENIC_TRANSPORT	PGPT0004755-aqpZ-K06188	1	0	1	1
PGPT0004760	DIRECT_EFFECTS	BIO-REMEDIATION	HEAVY_METAL_DETOXIFICATION	HEAVY_METAL_ARSENIC_RESISTANCE	ARSENIC_RESISTANCE-ARSENIC_TRANSPORT# PGPT	PGPT0004760-glpF|pduF-K02440	0	0	0	1
PGPT0004770	DIRECT_EFFECTS	BIO-REMEDIATION	HEAVY_METAL_DETOXIFICATION	HEAVY_METAL_LEAD_RESISTANCE	LEAD_RESISTANCE-PBR_TRANSPORT_SYSTEM	PGPT0004770-pbrB|pbrC-K03101	1	1	1	1
PGPT0004775	DIRECT_EFFECTS	BIO-REMEDIATION	HEAVY_METAL_DETOXIFICATION	HEAVY_METAL_MERCURY_RESISTANCE	MERCURY_RESISTANCE-MERCURY_HOMEOSTASIS	PGPT0004775-merA-K00520	0	0	1	0
PGPT0004790	DIRECT_EFFECTS	BIO-REMEDIATION	HEAVY_METAL_DETOXIFICATION	HEAVY_METAL_MERCURY_RESISTANCE	MERCURY_RESISTANCE-MERCURY_HOMEOSTASIS	PGPT0004790-merR-K08365	0	0	1	0
PGPT0004815	DIRECT_EFFECTS	BIO-REMEDIATION	HEAVY_METAL_DETOXIFICATION	HEAVY_METAL_SELENIUM_RESISTANCE	SELENIUM_RESISTANCE-SELENIUM_HOMEOSTASIS	PGPT0004815-selA-K01042	2	1	1	1
PGPT0004820	DIRECT_EFFECTS	BIO-REMEDIATION	HEAVY_METAL_DETOXIFICATION	HEAVY_METAL_SELENIUM_RESISTANCE	SELENIUM_RESISTANCE-SELENIUM_HOMEOSTASIS	PGPT0004820-selD-K01008	1	1	1	1
PGPT0004825	DIRECT_EFFECTS	BIO-REMEDIATION	HEAVY_METAL_DETOXIFICATION	HEAVY_METAL_SELENIUM_RESISTANCE	SELENIUM_RESISTANCE-SELENIUM_HOMEOSTASIS	PGPT0004825-selB-K03833	3	2	3	0
PGPT0004830	DIRECT_EFFECTS	BIO-REMEDIATION	HEAVY_METAL_DETOXIFICATION	HEAVY_METAL_SELENIUM_RESISTANCE	SELENIUM_RESISTANCE-SELENIUM_HOMEOSTASIS	PGPT0004830-selU|mnmH-K06917	0	0	0	1
PGPT0004890	DIRECT_EFFECTS	BIO-REMEDIATION	HEAVY_METAL_DETOXIFICATION	HEAVY_METAL_SELENIUM_RESISTANCE	SELENIUM_RESISTANCE-SELENIUM_TRANSPORT	PGPT0004890-dedA-K03975	1	2	0	2
PGPT0004905	DIRECT_EFFECTS	BIO-REMEDIATION	HEAVY_METAL_DETOXIFICATION	HEAVY_METAL_TELLURIUM_RESISTANCE	TELLURIUM_RESISTANCE-TER-SYSTEM	PGPT0004905-terC-K05794	1	0	0	3
PGPT0004925	DIRECT_EFFECTS	BIO-REMEDIATION	HEAVY_METAL_DETOXIFICATION	HEAVY_METAL_TELLURIUM_RESISTANCE	TELLURIUM_RESISTANCE-TER-SYSTEM	PGPT0004925-tehB-K16868	0	1	0	1
PGPT0004960	DIRECT_EFFECTS	BIO-REMEDIATION	HEAVY_METAL_DETOXIFICATION	HEAVY_METAL_ANTIMONY_RESISTANCE	ANTIMONY_RESISTANCE-ANTIMONY_HOMEOSTASIS	PGPT0004960-iscR-K13643	1	2	1	1
PGPT0004965	DIRECT_EFFECTS	BIO-REMEDIATION	HEAVY_METAL_DETOXIFICATION	OTHER_HEAVY_METAL_RESISTANCE_SYSTEMS	HEAVY_METAL_RESISTANCE-CUS_TRANSPORT_SYSTEM	PGPT0004965-czcA|cusA|cnrA-K15726	0	4	0	0
PGPT0004970	DIRECT_EFFECTS	BIO-REMEDIATION	HEAVY_METAL_DETOXIFICATION	OTHER_HEAVY_METAL_RESISTANCE_SYSTEMS	HEAVY_METAL_RESISTANCE-CUS_TRANSPORT_SYSTEM	PGPT0004970-czcB|cusB|cnrB-K15727	0	3	0	0
PGPT0004975	DIRECT_EFFECTS	BIO-REMEDIATION	HEAVY_METAL_DETOXIFICATION	OTHER_HEAVY_METAL_RESISTANCE_SYSTEMS	HEAVY_METAL_RESISTANCE-CUS_TRANSPORT_SYSTEM	PGPT0004975-czcC|cusC|cnrC-K15725	0	4	0	0
PGPT0004980	DIRECT_EFFECTS	BIO-REMEDIATION	HEAVY_METAL_DETOXIFICATION	OTHER_HEAVY_METAL_RESISTANCE_SYSTEMS	HEAVY_METAL_RESISTANCE-CUS_TRANSPORT_SYSTEM# PGPT	PGPT0004980-cusS|copS|silS-K07644	0	2	1	2
PGPT0004985	DIRECT_EFFECTS	BIO-REMEDIATION	FLUORIDE_DETOXIFICATION	FLUORIDE_RESISTANCE	FLUORIDE_RESISTANCE-FLUORIDE_TRANSPORT	PGPT0004985-crcB-K06199	2	1	1	0
PGPT0004990	DIRECT_EFFECTS	BIO-REMEDIATION	FLUORIDE_DETOXIFICATION	FLUORIDE_RESISTANCE	FLUORIDE_RESISTANCE-FLUORIDE_TRANSPORT# PGPT	PGPT0004990-TC_CIC|eriC-K03281	0	3	1	1
PGPT0004995	DIRECT_EFFECTS	BIO-REMEDIATION	XENOBIOTICS_BIODEGRADATION	XENOBIOTIC_BENZOATE|DERIVATE_DEGRADATION	XENOBIOTIC_BENZOATE_DEGRADATION_VIA_b-KETOADIPATE_PATHWAY# PGPT	PGPT0004995-pcaD|catD-K01055	3	6	4	0
PGPT0005000	DIRECT_EFFECTS	BIO-REMEDIATION	XENOBIOTICS_BIODEGRADATION	XENOBIOTIC_BENZOATE|DERIVATE_DEGRADATION	XENOBIOTIC_BENZOATE_DEGRADATION_VIA_b-KETOADIPATE_PATHWAY# PGPT	PGPT0005000-pcaB-K01857	2	1	1	0
PGPT0005005	DIRECT_EFFECTS	BIO-REMEDIATION	XENOBIOTICS_BIODEGRADATION	XENOBIOTIC_BENZOATE|DERIVATE_DEGRADATION	XENOBIOTIC_BENZOATE_DEGRADATION_VIA_b-KETOADIPATE_PATHWAY# PGPT	PGPT0005005-pcaC-K01607	0	0	1	0
PGPT0005010	DIRECT_EFFECTS	BIO-REMEDIATION	XENOBIOTICS_BIODEGRADATION	XENOBIOTIC_BENZOATE|DERIVATE_DEGRADATION	XENOBIOTIC_BENZOATE_DEGRADATION_VIA_b-KETOADIPATE_PATHWAY# PGPT	PGPT0005010-pcaG-K00448	1	1	1	0
PGPT0005015	DIRECT_EFFECTS	BIO-REMEDIATION	XENOBIOTICS_BIODEGRADATION	XENOBIOTIC_BENZOATE|DERIVATE_DEGRADATION	XENOBIOTIC_BENZOATE_DEGRADATION_VIA_b-KETOADIPATE_PATHWAY# PGPT	PGPT0005015-pcaH-K00449	1	1	1	0
PGPT0005020	DIRECT_EFFECTS	BIO-REMEDIATION	XENOBIOTICS_BIODEGRADATION	XENOBIOTIC_BENZOATE|DERIVATE_DEGRADATION	XENOBIOTIC_BENZOATE_DEGRADATION_VIA_b-KETOADIPATE_PATHWAY# PGPT	PGPT0005020-pcaL-K14727	1	1	1	0
PGPT0005025	DIRECT_EFFECTS	BIO-REMEDIATION	XENOBIOTICS_BIODEGRADATION	XENOBIOTIC_BENZOATE|DERIVATE_DEGRADATION	XENOBIOTIC_BENZOATE_DEGRADATION_VIA_b-KETOADIPATE_PATHWAY# PGPT	PGPT0005025-pcaI-K01031	1	1	0	0
PGPT0005030	DIRECT_EFFECTS	BIO-REMEDIATION	XENOBIOTICS_BIODEGRADATION	XENOBIOTIC_BENZOATE|DERIVATE_DEGRADATION	XENOBIOTIC_BENZOATE_DEGRADATION_VIA_b-KETOADIPATE_PATHWAY# PGPT	PGPT0005030-pcaJ-K01032	1	1	0	0
PGPT0005040	DIRECT_EFFECTS	BIO-REMEDIATION	XENOBIOTICS_BIODEGRADATION	XENOBIOTIC_BENZOATE|DERIVATE_DEGRADATION	XENOBIOTIC_BENZOATE_DEGRADATION_VIA_CATECHOL_DEGRADATION# PGPT	PGPT0005040-catB-K01856	0	1	0	0
PGPT0005045	DIRECT_EFFECTS	BIO-REMEDIATION	XENOBIOTICS_BIODEGRADATION	XENOBIOTIC_BENZOATE|DERIVATE_DEGRADATION	XENOBIOTIC_BENZOATE_DEGRADATION_VIA_CATECHOL_DEGRADATION# PGPT	PGPT0005045-catC-K03464	1	2	0	0
PGPT0005050	DIRECT_EFFECTS	BIO-REMEDIATION	XENOBIOTICS_BIODEGRADATION	XENOBIOTIC_BENZOATE|DERIVATE_DEGRADATION	XENOBIOTIC_BENZOATE_DEGRADATION_VIA_CATECHOL_DEGRADATION# PGPT	PGPT0005050-catE-K07104	0	1	1	0
PGPT0005055	DIRECT_EFFECTS	BIO-REMEDIATION	XENOBIOTICS_BIODEGRADATION	XENOBIOTIC_BENZOATE|DERIVATE_DEGRADATION	XENOBIOTIC_BENZOATE_DEGRADATION_VIA_CATECHOL_DEGRADATION# PGPT	PGPT0005055-dmpB|xylE-K00446	1	0	0	2
PGPT0005060	DIRECT_EFFECTS	BIO-REMEDIATION	XENOBIOTICS_BIODEGRADATION	XENOBIOTIC_BENZOATE|DERIVATE_DEGRADATION	XENOBIOTIC_BENZOATE_DEGRADATION_VIA_CATECHOL_DEGRADATION# PGPT	PGPT0005060-dmpC|xylG|praB-K10217	0	0	0	2
PGPT0005065	DIRECT_EFFECTS	BIO-REMEDIATION	XENOBIOTICS_BIODEGRADATION	XENOBIOTIC_BENZOATE|DERIVATE_DEGRADATION	XENOBIOTIC_HYDROXYBENZOATE_DEGRADATION# PGPT	PGPT0005065-pobA-K00481	0	0	1	0
PGPT0005070	DIRECT_EFFECTS	BIO-REMEDIATION	XENOBIOTICS_BIODEGRADATION	XENOBIOTIC_BENZOATE|DERIVATE_DEGRADATION	XENOBIOTIC_HYDROXYBENZOATE_DEGRADATION# PGPT	PGPT0005070-ligA-K04101	1	0	0	0
PGPT0005075	DIRECT_EFFECTS	BIO-REMEDIATION	XENOBIOTICS_BIODEGRADATION	XENOBIOTIC_BENZOATE|DERIVATE_DEGRADATION	XENOBIOTIC_HYDROXYBENZOATE_DEGRADATION# PGPT	PGPT0005075-ligB-K04100	1	0	0	0
PGPT0005085	DIRECT_EFFECTS	BIO-REMEDIATION	XENOBIOTICS_BIODEGRADATION	XENOBIOTIC_BENZOATE|DERIVATE_DEGRADATION	XENOBIOTIC_HYDROXYBENZOATE_DEGRADATION# PGPT	PGPT0005085-hcrC|hbaB-K04107	0	1	0	0
PGPT0005140	DIRECT_EFFECTS	BIO-REMEDIATION	XENOBIOTICS_BIODEGRADATION	XENOBIOTIC_BENZOATE|DERIVATE_DEGRADATION	XENOBIOTIC_BENZENE_DEGRADATION# PGPT	PGPT0005140-badA-K04110	0	2	0	0
PGPT0005175	DIRECT_EFFECTS	BIO-REMEDIATION	XENOBIOTICS_BIODEGRADATION	XENOBIOTIC_BENZOATE|DERIVATE_DEGRADATION	XENOBIOTIC_BENZOYL-CoA_DEGRADATION# PGPT	PGPT0005175-boxA-K15511	0	1	0	0
PGPT0005180	DIRECT_EFFECTS	BIO-REMEDIATION	XENOBIOTICS_BIODEGRADATION	XENOBIOTIC_BENZOATE|DERIVATE_DEGRADATION	XENOBIOTIC_BENZOYL-CoA_DEGRADATION# PGPT	PGPT0005180-boxB-K15512	0	1	0	0
PGPT0005185	DIRECT_EFFECTS	BIO-REMEDIATION	XENOBIOTICS_BIODEGRADATION	XENOBIOTIC_BENZOATE|DERIVATE_DEGRADATION	XENOBIOTIC_BENZOYL-CoA_DEGRADATION# PGPT	PGPT0005185-boxC-K15513	0	1	0	0
PGPT0005210	DIRECT_EFFECTS	BIO-REMEDIATION	XENOBIOTICS_BIODEGRADATION	XENOBIOTIC_BENZOATE|DERIVATE_DEGRADATION	XENOBIOTIC_BENZOATE-DEGREDATION-HOMEOSTASIS# PGPT	PGPT0005210-praC|xylH-K01821	0	2	2	0
PGPT0005211	DIRECT_EFFECTS	BIO-REMEDIATION	XENOBIOTICS_BIODEGRADATION	XENOBIOTIC_CYANATE_DETOXIFICATION	XENOBIOTIC_CYANATE_UPTAKE	PGPT0005211-cynX|yeaN-K03449	1	0	0	0
PGPT0005230	DIRECT_EFFECTS	BIO-REMEDIATION	XENOBIOTICS_BIODEGRADATION	XENOBIOTIC_BENZOATE|DERIVATE_DEGRADATION	XENOBIOTIC_BENZOATE-DEGREDATION-HOMEOSTASIS# PGPT	PGPT0005230-pimC-K04118	0	2	0	0
PGPT0005235	DIRECT_EFFECTS	BIO-REMEDIATION	XENOBIOTICS_BIODEGRADATION	XENOBIOTIC_BENZOATE|DERIVATE_DEGRADATION	XENOBIOTIC_BENZOATE-DEGREDATION-HOMEOSTASIS# PGPT	PGPT0005235-dmpD|xylF-K10216	1	0	0	0
PGPT0005270	DIRECT_EFFECTS	BIO-REMEDIATION	XENOBIOTICS_BIODEGRADATION	XENOBIOTIC_BENZOATE|DERIVATE_DEGRADATION	XENOBIOTIC_BENZOATE-DEGREDATION-HOMEOSTASIS# PGPT	PGPT0005270-cmtC|dhbA-K10621	0	1	0	0
PGPT0005285	DIRECT_EFFECTS	BIO-REMEDIATION	XENOBIOTICS_BIODEGRADATION	XENOBIOTIC_BENZOATE|DERIVATE_DEGRADATION	XENOBIOTIC_BENZOATE-DEGREDATION-HOMEOSTASIS# PGPT	PGPT0005285-galB-K16515	1	1	0	0
PGPT0005315	DIRECT_EFFECTS	BIO-REMEDIATION	XENOBIOTICS_BIODEGRADATION	XENOBIOTIC_BENZOATE|DERIVATE_DEGRADATION	XENOBIOTIC_CYCLOHEXANECARBOXYLIC_ACID_DEGRADATION# PGPT	PGPT0005315-badH-K07535	2	1	1	0
PGPT0005360	DIRECT_EFFECTS	BIO-REMEDIATION	XENOBIOTICS_BIODEGRADATION	XENOBIOTIC_BENZOATE|DERIVATE_DEGRADATION	XENOBIOTIC_BENZENE|PHENOL_DEGRADATION# PGPT	PGPT0005360-dmpP|poxF|tomA5-K16246	0	0	0	2
PGPT0005385	DIRECT_EFFECTS	BIO-REMEDIATION	XENOBIOTICS_BIODEGRADATION	XENOBIOTIC_BENZOATE|DERIVATE_DEGRADATION	XENOBIOTIC_BENZOATE-DEGREDATION-BENZOATE_TRANSPORT# PGPT	PGPT0005385-benE-K05782	1	1	2	0
PGPT0005390	DIRECT_EFFECTS	BIO-REMEDIATION	XENOBIOTICS_BIODEGRADATION	XENOBIOTIC_BENZOATE|DERIVATE_DEGRADATION	XENOBIOTIC_BENZOATE-DEGREDATION-BENZOATE_TRANSPORT	PGPT0005390-benK-K05548	0	0	0	1
PGPT0005400	DIRECT_EFFECTS	BIO-REMEDIATION	XENOBIOTICS_BIODEGRADATION	XENOBIOTIC_BENZOATE|DERIVATE_DEGRADATION	XENOBIOTIC_BENZOATE-DEGREDATION-BENZOATE_TRANSPORT# PGPT	PGPT0005400-pcaK-K08195	0	0	0	2
PGPT0005405	DIRECT_EFFECTS	BIO-REMEDIATION	XENOBIOTICS_BIODEGRADATION	XENOBIOTIC_BENZOATE|DERIVATE_DEGRADATION	XENOBIOTIC_BENZALDEHYDE_DEGRADATION# PGPT	PGPT0005405-xylC-K00141	1	0	0	0
PGPT0005435	DIRECT_EFFECTS	BIO-REMEDIATION	XENOBIOTICS_BIODEGRADATION	XENOBIOTIC_BENZOATE|DERIVATE_DEGRADATION	XENOBIOTIC_PHENOL_DEGRADATION# PGPT	PGPT0005435-bsdC-K01612	0	0	0	2
PGPT0005445	DIRECT_EFFECTS	BIO-REMEDIATION	XENOBIOTICS_BIODEGRADATION	XENOBIOTIC_BENZOATE|DERIVATE_DEGRADATION	XENOBIOTIC_PHENOL_DEGRADATION# PGPT	PGPT0005445-bsdD-K21759	0	0	0	1
PGPT0005475	DIRECT_EFFECTS	BIO-REMEDIATION	XENOBIOTICS_BIODEGRADATION	XENOBIOTIC_BENZOATE|DERIVATE_DEGRADATION	XENOBIOTIC_NITROBENZENE_DEGRADATION# PGPT	PGPT0005475-nbzA-K15057	0	1	1	0
PGPT0005490	DIRECT_EFFECTS	BIO-REMEDIATION	XENOBIOTICS_BIODEGRADATION	XENOBIOTIC_BENZOATE|DERIVATE_DEGRADATION	XENOBIOTIC_VANILLIN|VANILLATE_DEGRADATION# PGPT	PGPT0005490-vanA-K03862	1	1	0	1
PGPT0005560	DIRECT_EFFECTS	BIO-REMEDIATION	XENOBIOTICS_BIODEGRADATION	XENOBIOTIC_BENZOATE|DERIVATE_DEGRADATION	XENOBIOTIC_NITRO-|AMINOBENZOATE_DEGRADATION# PGPT	PGPT0005560-nbaA-K15055	0	1	0	0
PGPT0005570	DIRECT_EFFECTS	BIO-REMEDIATION	XENOBIOTICS_BIODEGRADATION	XENOBIOTIC_BENZOATE|DERIVATE_DEGRADATION	XENOBIOTIC_NITRO-|AMINOBENZOATE_DEGRADATION# PGPT	PGPT0005570-abmG-K08295	2	1	1	0
PGPT0005575	DIRECT_EFFECTS	BIO-REMEDIATION	XENOBIOTICS_BIODEGRADATION	XENOBIOTIC_BENZOATE|DERIVATE_DEGRADATION	XENOBIOTIC_NITRO-|AMINOBENZOATE_DEGRADATION# PGPT	PGPT0005575-namA-K09461	1	5	3	0
PGPT0005600	DIRECT_EFFECTS	BIO-REMEDIATION	XENOBIOTICS_BIODEGRADATION	XENOBIOTIC_BENZOATE|DERIVATE_DEGRADATION	XENOBIOTIC_THIOBENZAMIDE_DEGRADATION# PGPT	PGPT0005600-ethA-K10215	2	1	0	0
PGPT0005630	DIRECT_EFFECTS	BIO-REMEDIATION	XENOBIOTICS_BIODEGRADATION	XENOBIOTIC_BENZOATE|DERIVATE_DEGRADATION	XENOBIOTIC_NITROPHENOL_BENZOQUINONE_DEGRADATION# PGPT	PGPT0005630-glnA-K20712	0	1	0	0
PGPT0005660	DIRECT_EFFECTS	BIO-REMEDIATION	XENOBIOTICS_BIODEGRADATION	XENOBIOTIC_BENZOATE|DERIVATE_DEGRADATION	XENOBIOTIC_BROMOXYNIL_DEGRADATION# PGPT	PGPT0005660-nthA-K01721	0	0	1	0
PGPT0005665	DIRECT_EFFECTS	BIO-REMEDIATION	XENOBIOTICS_BIODEGRADATION	XENOBIOTIC_BENZOATE|DERIVATE_DEGRADATION	XENOBIOTIC_BROMOXYNIL_DEGRADATION# PGPT	PGPT0005665-nthB-K20807	0	0	1	0
PGPT0005685	DIRECT_EFFECTS	BIO-REMEDIATION	XENOBIOTICS_BIODEGRADATION	XENOBIOTIC_BENZOATE|DERIVATE_DEGRADATION	XENOBIOTIC_FLUOROCATECHOL_DEGRADATION# PGPT	PGPT0005685-catA-K01061	1	2	1	1
PGPT0005740	DIRECT_EFFECTS	BIO-REMEDIATION	XENOBIOTICS_BIODEGRADATION	XENOBIOTIC_BENZOATE|DERIVATE_DEGRADATION	XENOBIOTIC_PHENYLETHANOL_DEGRADATION# PGPT	PGPT0005740-apc-K10701	1	0	1	0
PGPT0005780	DIRECT_EFFECTS	BIO-REMEDIATION	XENOBIOTICS_BIODEGRADATION	XENOBIOTIC_BENZOATE|DERIVATE_DEGRADATION	XENOBIOTIC_BISPHENOL_DEGRADATION# PGPT	PGPT0005780-dad-K05913	0	0	1	0
PGPT0005815	DIRECT_EFFECTS	BIO-REMEDIATION	XENOBIOTICS_BIODEGRADATION	XENOBIOTIC_TOLULENE|DERIVATE_DEGRADATION	XENOBIOTIC_TOLUENE_DEGRADATION_PATHWAY_1	PGPT0005815-bbsF-K07544	0	1	0	0
PGPT0005920	DIRECT_EFFECTS	BIO-REMEDIATION	XENOBIOTICS_BIODEGRADATION	XENOBIOTIC_TOLULENE|DERIVATE_DEGRADATION	XENOBIOTIC_NITROTOLULENE_DEGRADATION# PGPT	PGPT0005920-nfsA-K10678	0	0	0	1
PGPT0005925	DIRECT_EFFECTS	BIO-REMEDIATION	XENOBIOTICS_BIODEGRADATION	XENOBIOTIC_TOLULENE|DERIVATE_DEGRADATION	XENOBIOTIC_NITROTOLULENE_DEGRADATION# PGPT	PGPT0005925-nfnB|nfsB-K10679	0	0	0	1
PGPT0005930	DIRECT_EFFECTS	BIO-REMEDIATION	XENOBIOTICS_BIODEGRADATION	XENOBIOTIC_TOLULENE|DERIVATE_DEGRADATION	XENOBIOTIC_NITROTOLULENE_DEGRADATION	PGPT0005930-nemA-K10680	1	1	0	0
PGPT0006005	DIRECT_EFFECTS	BIO-REMEDIATION	XENOBIOTICS_BIODEGRADATION	XENOBIOTIC_XYLENE|DERIVATE_DEGRADATION	XENOBIOTIC_METHYLCATECHOL_DEGRADATION# PGPT	PGPT0006005-mhpD-K02554	0	0	1	0
PGPT0006025	DIRECT_EFFECTS	BIO-REMEDIATION	XENOBIOTICS_BIODEGRADATION	XENOBIOTIC_STYRENE|DERIVATE_DEGRADATION	XENOBIOTIC_STYRENE_OXIDE_DEGRADATION	PGPT0006025-HGD|hmgA-K00451	1	1	1	0
PGPT0006045	DIRECT_EFFECTS	BIO-REMEDIATION	XENOBIOTICS_BIODEGRADATION	XENOBIOTIC_STYRENE|DERIVATE_DEGRADATION	XENOBIOTIC_PHENYLACETATE_DEGRADATION	PGPT0006045-paaA-K02609	1	1	0	1
PGPT0006050	DIRECT_EFFECTS	BIO-REMEDIATION	XENOBIOTICS_BIODEGRADATION	XENOBIOTIC_STYRENE|DERIVATE_DEGRADATION	XENOBIOTIC_PHENYLACETATE_DEGRADATION	PGPT0006050-paaB-K02610	1	1	0	0
PGPT0006055	DIRECT_EFFECTS	BIO-REMEDIATION	XENOBIOTICS_BIODEGRADATION	XENOBIOTIC_STYRENE|DERIVATE_DEGRADATION	XENOBIOTIC_PHENYLACETATE_DEGRADATION	PGPT0006055-paaC-K02611	1	1	0	0
PGPT0006060	DIRECT_EFFECTS	BIO-REMEDIATION	XENOBIOTICS_BIODEGRADATION	XENOBIOTIC_STYRENE|DERIVATE_DEGRADATION	XENOBIOTIC_PHENYLACETATE_DEGRADATION	PGPT0006060-paaD-K02612	1	1	0	0
PGPT0006065	DIRECT_EFFECTS	BIO-REMEDIATION	XENOBIOTICS_BIODEGRADATION	XENOBIOTIC_STYRENE|DERIVATE_DEGRADATION	XENOBIOTIC_PHENYLACETATE_DEGRADATION	PGPT0006065-paaE-K02613	1	2	0	1
PGPT0006070	DIRECT_EFFECTS	BIO-REMEDIATION	XENOBIOTICS_BIODEGRADATION	XENOBIOTIC_STYRENE|DERIVATE_DEGRADATION	XENOBIOTIC_PHENYLACETATE_DEGRADATION	PGPT0006070-paaG-K15866	3	4	2	1
PGPT0006075	DIRECT_EFFECTS	BIO-REMEDIATION	XENOBIOTICS_BIODEGRADATION	XENOBIOTIC_STYRENE|DERIVATE_DEGRADATION	XENOBIOTIC_PHENYLACETATE_DEGRADATION	PGPT0006075-paaH|hbd|fadB|mmgB-K00074	4	2	1	1
PGPT0006080	DIRECT_EFFECTS	BIO-REMEDIATION	XENOBIOTICS_BIODEGRADATION	XENOBIOTIC_STYRENE|DERIVATE_DEGRADATION	XENOBIOTIC_PHENYLACETATE_DEGRADATION	PGPT0006080-paaI-K02614	1	3	2	1
PGPT0006085	DIRECT_EFFECTS	BIO-REMEDIATION	XENOBIOTICS_BIODEGRADATION	XENOBIOTIC_STYRENE|DERIVATE_DEGRADATION	XENOBIOTIC_PHENYLACETATE_DEGRADATION	PGPT0006085-paaJ-K02615	0	0	0	2
PGPT0006090	DIRECT_EFFECTS	BIO-REMEDIATION	XENOBIOTICS_BIODEGRADATION	XENOBIOTIC_STYRENE|DERIVATE_DEGRADATION	XENOBIOTIC_PHENYLACETATE_DEGRADATION# PGPT	PGPT0006090-paaX-K02616	1	0	0	0
PGPT0006100	DIRECT_EFFECTS	BIO-REMEDIATION	XENOBIOTICS_BIODEGRADATION	XENOBIOTIC_STYRENE|DERIVATE_DEGRADATION	XENOBIOTIC_PHENYLACETATE_DEGRADATION	PGPT0006100-paaZ-K02618	1	0	1	2
PGPT0006115	DIRECT_EFFECTS	BIO-REMEDIATION	XENOBIOTICS_BIODEGRADATION	XENOBIOTIC_STYRENE|DERIVATE_DEGRADATION	XENOBIOTIC_ACRYLONITRITE|ACRYLAMIDE_DEGRADATION# PGPT	PGPT0006115-EC_3_5_1_4|amiE-K01426	5	4	7	0
PGPT0006150	DIRECT_EFFECTS	BIO-REMEDIATION	XENOBIOTICS_BIODEGRADATION	XENOBIOTIC_ATRAZINE|DERIVATE_DEGRADATION	XENOBIOTIC_ANTHROAZINE|MELAMINE|AMMELIDE_DEGRADATION	PGPT0006150-atzB-K03382	0	2	0	0
PGPT0006165	DIRECT_EFFECTS	BIO-REMEDIATION	XENOBIOTICS_BIODEGRADATION	XENOBIOTIC_ATRAZINE|DERIVATE_DEGRADATION	XENOBIOTIC_CYANURIC_ACID_DEGRADATION	PGPT0006165-atzE-K19837	0	2	0	0
PGPT0006170	DIRECT_EFFECTS	BIO-REMEDIATION	XENOBIOTICS_BIODEGRADATION	XENOBIOTIC_ATRAZINE|DERIVATE_DEGRADATION	XENOBIOTIC_BIURET_DEGRADATION	PGPT0006170-biuH-K23359	1	0	0	0
PGPT0006200	DIRECT_EFFECTS	BIO-REMEDIATION	XENOBIOTICS_BIODEGRADATION	XENOBIOTIC_CAPROLACTAM|DERIVATE_DEGRADATION	XENOBIOTIC_ADIPATE_DEGRADATION	PGPT0006200-dcaA-K06446	1	2	1	0
PGPT0006315	DIRECT_EFFECTS	BIO-REMEDIATION	XENOBIOTICS_BIODEGRADATION	XENOBIOTIC_DIOXIN|DERIVATE_DEGRADATION	XENOBIOTIC_PCDD|PCDF_DEGRADATION# PGPT	PGPT0006315-nahG-K00480	0	2	1	0
PGPT0006330	DIRECT_EFFECTS	BIO-REMEDIATION	XENOBIOTICS_BIODEGRADATION	XENOBIOTIC_NAPHTALENE|DERIVATE_DEGRADATION	XENOBIOTIC_NAPHTALENE_DEGRADATION	PGPT0006330-nahD-K14584	0	2	1	0
PGPT0006355	DIRECT_EFFECTS	BIO-REMEDIATION	XENOBIOTICS_BIODEGRADATION	XENOBIOTIC_NAPHTALENE|DERIVATE_DEGRADATION	XENOBIOTIC_METHYLNAPHTALENE_DEGRADATION# PGPT	PGPT0006355-frmA|ADH5|adhC-K00121	2	2	1	0
PGPT0006360	DIRECT_EFFECTS	BIO-REMEDIATION	XENOBIOTICS_BIODEGRADATION	XENOBIOTIC_NAPHTALENE|DERIVATE_DEGRADATION	XENOBIOTIC_METHYLNAPHTALENE_DEGRADATION# PGPT	PGPT0006360-adhE-K04072	0	0	0	1
PGPT0006365	DIRECT_EFFECTS	BIO-REMEDIATION	XENOBIOTICS_BIODEGRADATION	XENOBIOTIC_NAPHTALENE|DERIVATE_DEGRADATION	XENOBIOTIC_METHYLNAPHTALENE_DEGRADATION# PGPT	PGPT0006365-adhP-K13953	1	0	0	0
PGPT0006375	DIRECT_EFFECTS	BIO-REMEDIATION	XENOBIOTICS_BIODEGRADATION	XENOBIOTIC_NAPHTALENE|DERIVATE_DEGRADATION	XENOBIOTIC_METHYLNAPHTALENE_DEGRADATION# PGPT	PGPT0006375-EC_1_1_1_1|adh-K00001	3	2	4	0
PGPT0006470	DIRECT_EFFECTS	BIO-REMEDIATION	XENOBIOTICS_BIODEGRADATION	XENOBIOTIC_POLYCYCLIC_AROMATIC_HYDROCARBON_DEGRADATION	XENOBIOTIC_PHENANTHRENE_DEGRADATION# PGPT	PGPT0006470-nidD-K11947	1	0	0	0
PGPT0006520	DIRECT_EFFECTS	BIO-REMEDIATION	XENOBIOTICS_BIODEGRADATION	XENOBIOTIC_POLYCYCLIC_AROMATIC_HYDROCARBON_DEGRADATION	XENOBIOTIC_PHTHALATE_DEGRADATION-PHTHALATE_TRANSPORT# PGPT	PGPT0006520-ophD|pht1-K18070	0	1	0	0
PGPT0006610	DIRECT_EFFECTS	BIO-REMEDIATION	XENOBIOTICS_BIODEGRADATION	XENOBIOTIC_FURFURAL|DERIVATE_DEGRADATION	XENOBIOTIC_FURFURAL_HOMEOSTASIS	PGPT0006610-hmfF-K16874	0	1	0	0
PGPT0006615	DIRECT_EFFECTS	BIO-REMEDIATION	XENOBIOTICS_BIODEGRADATION	XENOBIOTIC_FURFURAL|DERIVATE_DEGRADATION	XENOBIOTIC_FURFURAL_HOMEOSTASIS	PGPT0006615-hmfG-K16875	0	1	0	0
PGPT0006625	DIRECT_EFFECTS	BIO-REMEDIATION	XENOBIOTICS_BIODEGRADATION	XENOBIOTIC_FURFURAL|DERIVATE_DEGRADATION	XENOBIOTIC_FURFURAL_HOMEOSTASIS	PGPT0006625-hmfA-K16877	4	2	4	0
PGPT0006630	DIRECT_EFFECTS	BIO-REMEDIATION	XENOBIOTICS_BIODEGRADATION	XENOBIOTIC_FURFURAL|DERIVATE_DEGRADATION	XENOBIOTIC_FURFURAL_HOMEOSTASIS	PGPT0006630-hmfB-K16878	2	1	1	0
PGPT0006635	DIRECT_EFFECTS	BIO-REMEDIATION	XENOBIOTICS_BIODEGRADATION	XENOBIOTIC_FURFURAL|DERIVATE_DEGRADATION	XENOBIOTIC_FURFURAL_HOMEOSTASIS	PGPT0006635-hmfC-K16879	2	1	0	0
PGPT0006645	DIRECT_EFFECTS	BIO-REMEDIATION	XENOBIOTICS_BIODEGRADATION	XENOBIOTIC_STEROID|DERIVATE_DEGRADATION	XENOBIOTIC_CHOLESTEROL_DEGRADATION_	PGPT0006645-choD-K03333	1	0	0	0
PGPT0006650	DIRECT_EFFECTS	BIO-REMEDIATION	XENOBIOTICS_BIODEGRADATION	XENOBIOTIC_STEROID|DERIVATE_DEGRADATION	XENOBIOTIC_CHOLESTEROL_DEGRADATION_	PGPT0006650-hsd-K16045	0	1	1	0
PGPT0006700	DIRECT_EFFECTS	BIO-REMEDIATION	XENOBIOTICS_BIODEGRADATION	XENOBIOTIC_STEROID|DERIVATE_DEGRADATION	XENOBIOTIC_ADROSTENEDIONE_DEGRADATION	PGPT0006700-hsaB-K16048	2	0	1	0
PGPT0006720	DIRECT_EFFECTS	BIO-REMEDIATION	XENOBIOTICS_BIODEGRADATION	XENOBIOTIC_STEROID|DERIVATE_DEGRADATION	XENOBIOTIC_STEROID_DEGRADATION-STEROID_TRANSPORT	PGPT0006720-mas-K18481	3	0	0	0
PGPT0006725	DIRECT_EFFECTS	BIO-REMEDIATION	XENOBIOTICS_BIODEGRADATION	XENOBIOTIC_DETOXIFICATION_BY_TRANSPORT	XENOBIOTICS_TRANSPORT# PGPT	PGPT0006725-ybhF|yadG|ecsA-K01990	10	3	3	3
PGPT0006730	DIRECT_EFFECTS	BIO-REMEDIATION	XENOBIOTICS_BIODEGRADATION	XENOBIOTIC_DETOXIFICATION_BY_TRANSPORT	XENOBIOTICS_TRANSPORT# PGPT	PGPT0006730-ybhS|ecsB-K01992	10	3	2	2
PGPT0006740	DIRECT_EFFECTS	BIO-REMEDIATION	XENOBIOTICS_BIODEGRADATION	XENOBIOTIC_FATTY_ACID|VITAMIN|TERPENE_DEGRADATION	XENOBIOTIC_FATTY_ACID|VITAMIN|TERPENE_DEGRADATION-CYTOCHROME_P450# PGPT	PGPT0006740-cpxB-K14338	0	2	1	1
PGPT0006760	DIRECT_EFFECTS	BIO-REMEDIATION	XENOBIOTICS_BIODEGRADATION	XENOBIOTIC_DEGRADATION_OF_ORGANO-PHOSPHORUS_INSECTICIDES	XENOBIOTIC_ORGANOPHOSPHATE_DEGRADTION# PGPT	PGPT0006760-opaA|pepQ-K01271	0	1	1	2
PGPT0006762	DIRECT_EFFECTS	BIO-REMEDIATION	XENOBIOTICS_BIODEGRADATION	XENOBIOTIC_DEGRADATION_OF_ORGANO-PHOSPHORUS_INSECTICIDES	XENOBIOTIC_ORGANOPHOSPHATE_DEGRADTION	PGPT0006762-mpd-NA	0	1	0	0
PGPT0006770	DIRECT_EFFECTS	BIO-REMEDIATION	XENOBIOTICS_BIODEGRADATION	XENOBIOTIC_DEGRADATION_OF_ORGANO-PHOSPHORUS_INSECTICIDES	XENOBIOTIC_ORGANOPHOSPHATE_DEGRADTION# PGPT	PGPT0006770-pepP-K01262	1	1	1	3
PGPT0006775	DIRECT_EFFECTS	BIO-REMEDIATION	XENOBIOTICS_BIODEGRADATION	XENOBIOTIC_DEGRADATION_OF_ORGANO-PHOSPHORUS_INSECTICIDES	XENOBIOTIC_ORGANOPHOSPHATE_DEGRADTION# PGPT	PGPT0006775-glpA|glpD-K00111	1	2	2	2
PGPT0006786	DIRECT_EFFECTS	BIO-REMEDIATION	XENOBIOTICS_BIODEGRADATION	XENOBIOTIC_DEGRADATION_OF_OTHER_NITRO-COMPOUNDS	XENOBIOTIC_CHLOROACETANILIDE_DEGRADTION# PGPT	PGPT0006786-fdx|cndB-K04755	0	1	2	2
PGPT0006790	DIRECT_EFFECTS	BIO-REMEDIATION	XENOBIOTICS_BIODEGRADATION	XENOBIOTIC_DEGRADATION_OF_OTHER_NITRO-COMPOUNDS	XENOBIOTIC_AZO_DYE_DEGRADATION	PGPT0006790-acpD|azoR-K01118	0	1	0	1
PGPT0006800	DIRECT_EFFECTS	BIO-REMEDIATION	XENOBIOTICS_BIODEGRADATION	XENOBIOTIC_DEGRADATION_OF_OTHER_NITRO-COMPOUNDS	XENOBIOTIC_NITROALKANE|NITRONATE_DEGRADATION# PGPT	PGPT0006800-ncd2|npd|pnoA-K00459	1	3	3	0
PGPT0006810	DIRECT_EFFECTS	BIO-REMEDIATION	XENOBIOTICS_BIODEGRADATION	XENOBIOTIC_DEGRADATION_OF_OTHER_NITRO-COMPOUNDS	XENOBIOTIC_NITRO-AROMATE_DEGRADATION# PGPT	PGPT0006810-bluB|drgA-K04719	0	1	2	0
PGPT0006855	DIRECT_EFFECTS	BIO-REMEDIATION	XENOBIOTICS_BIODEGRADATION	XENOBIOTIC_HYDROCARBONS|OIL_DEGRADATION	XENOBIOTIC_DICHLOROETHANE_DEGRADATION# PGPT	PGPT0006855-dhaA-K01563	1	1	1	2
PGPT0006875	DIRECT_EFFECTS	BIO-REMEDIATION	XENOBIOTICS_BIODEGRADATION	XENOBIOTIC_HYDROCARBONS|OIL_DEGRADATION	XENOBIOTIC_DICHLOROETHANE_DEGRADATION# PGPT	PGPT0006875-aldH|dhaS-K00128	2	4	3	3
PGPT0006880	DIRECT_EFFECTS	BIO-REMEDIATION	XENOBIOTICS_BIODEGRADATION	XENOBIOTIC_HYDROCARBONS|OIL_DEGRADATION	XENOBIOTIC_DICHLOROETHANE_DEGRADATION	PGPT0006880-dehH-K01561	1	2	5	0
PGPT0006885	DIRECT_EFFECTS	BIO-REMEDIATION	XENOBIOTICS_BIODEGRADATION	XENOBIOTIC_HYDROCARBONS|OIL_DEGRADATION	XENOBIOTIC_DICHLOROETHANE_DEGRADATION	PGPT0006885-dehI-K01560	0	1	2	0
PGPT0006995	DIRECT_EFFECTS	BIO-REMEDIATION	XENOBIOTICS_BIODEGRADATION	XENOBIOTIC_HYDROCARBONS|OIL_DEGRADATION	XENOBIOTIC_CHLORPHENOL_DERIVATE_DEGRADATION	PGPT0006995-pcpD-K21607	1	2	0	0
PGPT0007005	DIRECT_EFFECTS	BIO-REMEDIATION	XENOBIOTICS_BIODEGRADATION	XENOBIOTIC_HYDROCARBONS|OIL_DEGRADATION	XENOBIOTIC_HEXA-|PENTA-CHLOROCYCLOHEXANE_DEGRADATION# PGPT	PGPT0007005-mlaD|linM-K02067	6	2	1	2
PGPT0007010	DIRECT_EFFECTS	BIO-REMEDIATION	XENOBIOTICS_BIODEGRADATION	XENOBIOTIC_HYDROCARBONS|OIL_DEGRADATION	XENOBIOTIC_HEXA-|PENTA-CHLOROCYCLOHEXANE_DEGRADATION# PGPT	PGPT0007010-mlaE|linK-K02066	2	2	1	1
PGPT0007015	DIRECT_EFFECTS	BIO-REMEDIATION	XENOBIOTICS_BIODEGRADATION	XENOBIOTIC_HYDROCARBONS|OIL_DEGRADATION	XENOBIOTIC_HEXA-|PENTA-CHLOROCYCLOHEXANE_DEGRADATION# PGPT	PGPT0007015-mlaF|linL|mkl-K02065	1	2	1	1
PGPT0007020	DIRECT_EFFECTS	BIO-REMEDIATION	XENOBIOTICS_BIODEGRADATION	XENOBIOTIC_HYDROCARBONS|OIL_DEGRADATION	XENOBIOTIC_HEXA-|PENTA-CHLOROCYCLOHEXANE_DEGRADATION# PGPT	PGPT0007020-linN-K18480	0	1	1	0
PGPT0007070	DIRECT_EFFECTS	PHYTOHORMONE|PLANT_SIGNAL_PRODUCTION	PHYTOHORMONE-ABSCISIC_ACID_DEGRADATION	PHYTOHORMONE-AUXINE|INDOLE‐3‐ACETIC_ACID|IAA_METABOLISM	PHYTOHORMONE-IAA_RELATED_TRYPTOPHAN_PATHWAY# PGPT	PGPT0007070-trpA-K01695	1	1	1	0
PGPT0007075	DIRECT_EFFECTS	PHYTOHORMONE|PLANT_SIGNAL_PRODUCTION	PHYTOHORMONE-ABSCISIC_ACID_DEGRADATION	PHYTOHORMONE-AUXINE|INDOLE‐3‐ACETIC_ACID|IAA_METABOLISM	PHYTOHORMONE-IAA_RELATED_TRYPTOPHAN_PATHWAY# PGPT	PGPT0007075-trpB-K01696	1	1	1	0
PGPT0007080	DIRECT_EFFECTS	PHYTOHORMONE|PLANT_SIGNAL_PRODUCTION	PHYTOHORMONE-ABSCISIC_ACID_DEGRADATION	PHYTOHORMONE-AUXINE|INDOLE‐3‐ACETIC_ACID|IAA_METABOLISM	PHYTOHORMONE-IAA_RELATED_TRYPTOPHAN_PATHWAY# PGPT	PGPT0007080-trpC-K01609	1	1	1	0
PGPT0007085	DIRECT_EFFECTS	PHYTOHORMONE|PLANT_SIGNAL_PRODUCTION	PHYTOHORMONE-ABSCISIC_ACID_DEGRADATION	PHYTOHORMONE-AUXINE|INDOLE‐3‐ACETIC_ACID|IAA_METABOLISM	PHYTOHORMONE-IAA_RELATED_TRYPTOPHAN_PATHWAY# PGPT	PGPT0007085-trpCF-K13498	0	0	0	1
PGPT0007090	DIRECT_EFFECTS	PHYTOHORMONE|PLANT_SIGNAL_PRODUCTION	PHYTOHORMONE-ABSCISIC_ACID_DEGRADATION	PHYTOHORMONE-AUXINE|INDOLE‐3‐ACETIC_ACID|IAA_METABOLISM	PHYTOHORMONE-IAA_RELATED_TRYPTOPHAN_PATHWAY# PGPT	PGPT0007090-trpD-K00766	2	3	2	1
PGPT0007095	DIRECT_EFFECTS	PHYTOHORMONE|PLANT_SIGNAL_PRODUCTION	PHYTOHORMONE-ABSCISIC_ACID_DEGRADATION	PHYTOHORMONE-AUXINE|INDOLE‐3‐ACETIC_ACID|IAA_METABOLISM	PHYTOHORMONE-IAA_RELATED_TRYPTOPHAN_PATHWAY# PGPT	PGPT0007095-trpE|phnA-K01657	2	2	3	2
PGPT0007105	DIRECT_EFFECTS	PHYTOHORMONE|PLANT_SIGNAL_PRODUCTION	PHYTOHORMONE-ABSCISIC_ACID_DEGRADATION	PHYTOHORMONE-AUXINE|INDOLE‐3‐ACETIC_ACID|IAA_METABOLISM	PHYTOHORMONE-IAA_RELATED_TRYPTOPHAN_PATHWAY# PGPT	PGPT0007105-trpG|phnB-K01658	2	1	1	0
PGPT0007110	DIRECT_EFFECTS	PHYTOHORMONE|PLANT_SIGNAL_PRODUCTION	PHYTOHORMONE-ABSCISIC_ACID_DEGRADATION	PHYTOHORMONE-AUXINE|INDOLE‐3‐ACETIC_ACID|IAA_METABOLISM	PHYTOHORMONE-IAA_RELATED_TRYPTOPHAN_PATHWAY# PGPT	PGPT0007110-trpDG-K13497	0	0	0	2
PGPT0007115	DIRECT_EFFECTS	PHYTOHORMONE|PLANT_SIGNAL_PRODUCTION	PHYTOHORMONE-ABSCISIC_ACID_DEGRADATION	PHYTOHORMONE-AUXINE|INDOLE‐3‐ACETIC_ACID|IAA_METABOLISM	PHYTOHORMONE-IAA_RELATED_TRYPTOPHAN_PATHWAY# PGPT	PGPT0007115-trpF-K01817	0	1	1	0
PGPT0007120	DIRECT_EFFECTS	PHYTOHORMONE|PLANT_SIGNAL_PRODUCTION	PHYTOHORMONE-ABSCISIC_ACID_DEGRADATION	PHYTOHORMONE-AUXINE|INDOLE‐3‐ACETIC_ACID|IAA_METABOLISM	PHYTOHORMONE-IAA_RELATED_TRYPTOPHAN_PATHWAY# PGPT	PGPT0007120-trpS-K01867	1	2	1	3
PGPT0007130	DIRECT_EFFECTS	PHYTOHORMONE|PLANT_SIGNAL_PRODUCTION	PHYTOHORMONE-ABSCISIC_ACID_DEGRADATION	PHYTOHORMONE-AUXINE|INDOLE‐3‐ACETIC_ACID|IAA_METABOLISM	PHYTOHORMONE-IAA_RELATED_TRYPTOPHAN_PATHWAY# PGPT	PGPT0007130-trpR-K03720	0	0	0	1
PGPT0007135	DIRECT_EFFECTS	PHYTOHORMONE|PLANT_SIGNAL_PRODUCTION	PHYTOHORMONE-ABSCISIC_ACID_DEGRADATION	PHYTOHORMONE-AUXINE|INDOLE‐3‐ACETIC_ACID|IAA_METABOLISM	PHYTOHORMONE-IAA_RELATED_TRYPTOPHAN_PATHWAY# PGPT	PGPT0007135-lysN-K05825	1	3	3	1
PGPT0007136	DIRECT_EFFECTS	PHYTOHORMONE|PLANT_SIGNAL_PRODUCTION	PHYTOHORMONE-ABSCISIC_ACID_DEGRADATION	PHYTOHORMONE-AUXINE|INDOLE‐3‐ACETIC_ACID|IAA_METABOLISM	PHYTOHORMONE-IAA_RELATED_TRYPTOPHAN_PATHWAY	PGPT0007136-yodT-NA	0	1	0	0
PGPT0007140	DIRECT_EFFECTS	PHYTOHORMONE|PLANT_SIGNAL_PRODUCTION	PHYTOHORMONE-ABSCISIC_ACID_DEGRADATION	PHYTOHORMONE-AUXINE|INDOLE‐3‐ACETIC_ACID|IAA_METABOLISM	PHYTOHORMONE-IAA_RELATED_TRYPTOPHAN_PATHWAY# PGPT	PGPT0007140-puuE-K00823	0	0	1	2
PGPT0007145	DIRECT_EFFECTS	PHYTOHORMONE|PLANT_SIGNAL_PRODUCTION	PHYTOHORMONE-ABSCISIC_ACID_DEGRADATION	PHYTOHORMONE-AUXINE|INDOLE‐3‐ACETIC_ACID|IAA_METABOLISM	PHYTOHORMONE-IAA_RELATED_TRYPTOPHAN_PATHWAY# PGPT	PGPT0007145-yugH-K10907	2	0	2	0
PGPT0007155	DIRECT_EFFECTS	PHYTOHORMONE|PLANT_SIGNAL_PRODUCTION	PHYTOHORMONE-ABSCISIC_ACID_DEGRADATION	PHYTOHORMONE-AUXINE|INDOLE‐3‐ACETIC_ACID|IAA_METABOLISM	PHYTOHORMONE-IAA_RELATED_TRYPTOPHAN_PATHWAY# PGPT	PGPT0007155-patA1-K09251	0	0	1	1
PGPT0007165	DIRECT_EFFECTS	PHYTOHORMONE|PLANT_SIGNAL_PRODUCTION	PHYTOHORMONE-ABSCISIC_ACID_DEGRADATION	PHYTOHORMONE-AUXINE|INDOLE‐3‐ACETIC_ACID|IAA_METABOLISM	PHYTOHORMONE-IAA_RELATED_INDOLE-3-ACETALDEHYDE_PATHWAY# PGPT	PGPT0007165-betB_homologous-K00130	2	2	0	2
PGPT0007176	DIRECT_EFFECTS	PHYTOHORMONE|PLANT_SIGNAL_PRODUCTION	PHYTOHORMONE-ABSCISIC_ACID_DEGRADATION	PHYTOHORMONE-AUXINE|INDOLE‐3‐ACETIC_ACID|IAA_METABOLISM	PHYTOHORMONE-IAA_PATHWAY# PGPT	PGPT0007176-aldB-K00138	1	0	0	1
PGPT0007180	DIRECT_EFFECTS	PHYTOHORMONE|PLANT_SIGNAL_PRODUCTION	PHYTOHORMONE-ABSCISIC_ACID_DEGRADATION	PHYTOHORMONE-AUXINE|INDOLE‐3‐ACETIC_ACID|IAA_METABOLISM	PHYTOHORMONE-IAA_PATHWAY# PGPT	PGPT0007180-iaaT|yedL|ysnE-K03829	3	0	0	1
PGPT0007208	DIRECT_EFFECTS	PHYTOHORMONE|PLANT_SIGNAL_PRODUCTION	PHYTOHORMONE-ABSCISIC_ACID_DEGRADATION	PHYTOHORMONE-AUXINE|INDOLE‐3‐ACETIC_ACID|IAA_METABOLISM	PHYTOHORMONE-IAA-AUXIN_TRANSPORT_PLANT_LIKE	PGPT0007208-auxin_symporter-NA	0	1	0	0
PGPT0007210	DIRECT_EFFECTS	PHYTOHORMONE|PLANT_SIGNAL_PRODUCTION	PHYTOHORMONE-CYTOKININS|DERIVATE_PRODUCTION	PHYTOHORMONE-CYTOKININ_METABOLISM	PHYTOHORMONE-CYTOKININ_BIOSYNTHESIS# PGPT	PGPT0007210-miaA|ipt-K00791	0	1	1	1
PGPT0007215	DIRECT_EFFECTS	PHYTOHORMONE|PLANT_SIGNAL_PRODUCTION	PHYTOHORMONE-CYTOKININS|DERIVATE_PRODUCTION	PHYTOHORMONE-CYTOKININ_METABOLISM	PHYTOHORMONE-CYTOKININ_BIOSYNTHESIS	PGPT0007215-miaB-K06168	2	3	4	3
PGPT0007220	DIRECT_EFFECTS	PHYTOHORMONE|PLANT_SIGNAL_PRODUCTION	PHYTOHORMONE-CYTOKININS|DERIVATE_PRODUCTION	PHYTOHORMONE-CYTOKININ_METABOLISM	PHYTOHORMONE-CYTOKININ_BIOSYNTHESIS	PGPT0007220-miaE-K06169	0	0	0	1
PGPT0007225	DIRECT_EFFECTS	PHYTOHORMONE|PLANT_SIGNAL_PRODUCTION	PHYTOHORMONE-CYTOKININS|DERIVATE_PRODUCTION	PHYTOHORMONE-CYTOKININ_METABOLISM	PHYTOHORMONE-CYTOKININ_BIOSYNTHESIS	PGPT0007225-log|yvdD-K22522	1	2	2	0
PGPT0007230	DIRECT_EFFECTS	PHYTOHORMONE|PLANT_SIGNAL_PRODUCTION	PHYTOHORMONE-CYTOKININS|DERIVATE_PRODUCTION	PHYTOHORMONE-CYTOKININ_METABOLISM	PHYTOHORMONE-CYTOKININ_BIOSYNTHESIS	PGPT0007230-dapF-K01778	1	1	1	1
PGPT0007235	DIRECT_EFFECTS	PHYTOHORMONE|PLANT_SIGNAL_PRODUCTION	PHYTOHORMONE-CYTOKININS|DERIVATE_PRODUCTION	PHYTOHORMONE-CYTOKININ_METABOLISM	PHYTOHORMONE-CYTOKININ_BIOSYNTHESIS# PGPT	PGPT0007235-recA-K03553	1	1	1	1
PGPT0007240	DIRECT_EFFECTS	PHYTOHORMONE|PLANT_SIGNAL_PRODUCTION	PHYTOHORMONE-CYTOKININS|DERIVATE_PRODUCTION	PHYTOHORMONE-CYTOKININ_METABOLISM	PHYTOHORMONE-CYTOKININ_BIOSYNTHESIS	PGPT0007240-recX-K03565	1	1	0	1
PGPT0007245	DIRECT_EFFECTS	PHYTOHORMONE|PLANT_SIGNAL_PRODUCTION	PHYTOHORMONE-CYTOKININS|DERIVATE_PRODUCTION	PHYTOHORMONE-CYTOKININ_METABOLISM	PHYTOHORMONE-CYTOKININ_BIOSYNTHESIS	PGPT0007245-hflX-K03665	4	6	3	5
PGPT0007250	DIRECT_EFFECTS	PHYTOHORMONE|PLANT_SIGNAL_PRODUCTION	PHYTOHORMONE-CYTOKININS|DERIVATE_PRODUCTION	PHYTOHORMONE-XANTHINE_METABOLISM	PHYTOHORMONE-XANTHINE_BIOSYNTHESIS# PGPT	PGPT0007250-xdhA-K13481	0	1	1	0
PGPT0007255	DIRECT_EFFECTS	PHYTOHORMONE|PLANT_SIGNAL_PRODUCTION	PHYTOHORMONE-CYTOKININS|DERIVATE_PRODUCTION	PHYTOHORMONE-XANTHINE_METABOLISM	PHYTOHORMONE-XANTHINE_BIOSYNTHESIS# PGPT	PGPT0007255-ygeS|xdhA-K00087	0	1	0	0
PGPT0007260	DIRECT_EFFECTS	PHYTOHORMONE|PLANT_SIGNAL_PRODUCTION	PHYTOHORMONE-CYTOKININS|DERIVATE_PRODUCTION	PHYTOHORMONE-XANTHINE_METABOLISM	PHYTOHORMONE-XANTHINE_BIOSYNTHESIS# PGPT	PGPT0007260-yagR-K11177	1	1	0	0
PGPT0007265	DIRECT_EFFECTS	PHYTOHORMONE|PLANT_SIGNAL_PRODUCTION	PHYTOHORMONE-CYTOKININS|DERIVATE_PRODUCTION	PHYTOHORMONE-XANTHINE_METABOLISM	PHYTOHORMONE-XANTHINE_BIOSYNTHESIS# PGPT	PGPT0007265-xdhB|pucD-K13482	0	1	1	0
PGPT0007270	DIRECT_EFFECTS	PHYTOHORMONE|PLANT_SIGNAL_PRODUCTION	PHYTOHORMONE-CYTOKININS|DERIVATE_PRODUCTION	PHYTOHORMONE-XANTHINE_METABOLISM	PHYTOHORMONE-XANTHINE_BIOSYNTHESIS# PGPT	PGPT0007270-ygeT|xdhB-K13479	0	1	0	0
PGPT0007275	DIRECT_EFFECTS	PHYTOHORMONE|PLANT_SIGNAL_PRODUCTION	PHYTOHORMONE-CYTOKININS|DERIVATE_PRODUCTION	PHYTOHORMONE-XANTHINE_METABOLISM	PHYTOHORMONE-XANTHINE_BIOSYNTHESIS# PGPT	PGPT0007275-yagS-K11178	1	1	0	0
PGPT0007280	DIRECT_EFFECTS	PHYTOHORMONE|PLANT_SIGNAL_PRODUCTION	PHYTOHORMONE-CYTOKININS|DERIVATE_PRODUCTION	PHYTOHORMONE-XANTHINE_METABOLISM	PHYTOHORMONE-XANTHINE_BIOSYNTHESIS	PGPT0007280-xdhC|paod|ygeB|pucA-K07402	1	2	3	0
PGPT0007290	DIRECT_EFFECTS	PHYTOHORMONE|PLANT_SIGNAL_PRODUCTION	PHYTOHORMONE-CYTOKININS|DERIVATE_PRODUCTION	PHYTOHORMONE-XANTHINE_METABOLISM	PHYTOHORMONE-XANTHINE_BIOSYNTHESIS# PGPT	PGPT0007290-yagT-K13483	2	1	1	0
PGPT0007295	DIRECT_EFFECTS	PHYTOHORMONE|PLANT_SIGNAL_PRODUCTION	PHYTOHORMONE-CYTOKININS|DERIVATE_PRODUCTION	PHYTOHORMONE-XANTHINE_METABOLISM	PHYTOHORMONE-XANTHINE_BIOSYNTHESIS# PGPT	PGPT0007295-hprT|hpt-K00760	1	1	1	1
PGPT0007300	DIRECT_EFFECTS	PHYTOHORMONE|PLANT_SIGNAL_PRODUCTION	PHYTOHORMONE-CYTOKININS|DERIVATE_PRODUCTION	PHYTOHORMONE-XANTHINE_METABOLISM	PHYTOHORMONE-XANTHINE_BIOSYNTHESIS# PGPT	PGPT0007300-gpt-K00769	0	1	1	1
PGPT0007325	DIRECT_EFFECTS	PHYTOHORMONE|PLANT_SIGNAL_PRODUCTION	PHYTOHORMONE-CYTOKININS|DERIVATE_PRODUCTION	PHYTOHORMONE-XANTHINE_METABOLISM	PHYTOHORMONE-XANTHINE_TRANSPORT	PGPT0007325-pbuG|azgA|ghxP|ghxQ|adeQ-K06901	1	2	1	6
PGPT0007330	DIRECT_EFFECTS	PHYTOHORMONE|PLANT_SIGNAL_PRODUCTION	PHYTOHORMONE-CYTOKININS|DERIVATE_PRODUCTION	PHYTOHORMONE-XANTHINE_METABOLISM	PHYTOHORMONE-XANTHINE_TRANSPORT	PGPT0007330-pubX-K16169	1	4	1	1
PGPT0007335	DIRECT_EFFECTS	PHYTOHORMONE|PLANT_SIGNAL_PRODUCTION	PHYTOHORMONE-CYTOKININS|DERIVATE_PRODUCTION	PHYTOHORMONE-XANTHINE_METABOLISM	PHYTOHORMONE-XANTHINE_TRANSPORT	PGPT0007335-xanP-K16345	0	0	0	1
PGPT0007375	DIRECT_EFFECTS	PHYTOHORMONE|PLANT_SIGNAL_PRODUCTION	PLANT_SIGNAL-OTHER_TERPENOID|DERIVATE_PRODUCTION	PLANT_SIGNAL-CAROTINOID_METABOLISM	PLANT_SIGNAL-CAROTENOID_BIOSYNTHESIS# PGPT	PGPT0007375-crtB-K02291	1	2	1	0
PGPT0007405	DIRECT_EFFECTS	PHYTOHORMONE|PLANT_SIGNAL_PRODUCTION	PLANT_SIGNAL-OTHER_TERPENOID|DERIVATE_PRODUCTION	PLANT_SIGNAL-CAROTINOID_METABOLISM	PLANT_SIGNAL-CAROTENOID_BIOSYNTHESIS# PGPT	PGPT0007405-crtI-K10027	2	0	0	0
PGPT0007420	DIRECT_EFFECTS	PHYTOHORMONE|PLANT_SIGNAL_PRODUCTION	PLANT_SIGNAL-OTHER_TERPENOID|DERIVATE_PRODUCTION	PLANT_SIGNAL-CAROTINOID_METABOLISM	PLANT_SIGNAL-CAROTENOID_BIOSYNTHESIS# PGPT	PGPT0007420-crtM-K10208	0	1	0	0
PGPT0007430	DIRECT_EFFECTS	PHYTOHORMONE|PLANT_SIGNAL_PRODUCTION	PLANT_SIGNAL-OTHER_TERPENOID|DERIVATE_PRODUCTION	PLANT_SIGNAL-CAROTINOID_METABOLISM	PLANT_SIGNAL-CAROTENOID_BIOSYNTHESIS# PGPT	PGPT0007430-crtO-K02292	1	0	0	0
PGPT0007495	DIRECT_EFFECTS	PHYTOHORMONE|PLANT_SIGNAL_PRODUCTION	PLANT_SIGNAL-OTHER_TERPENOID|DERIVATE_PRODUCTION	PLANT_SIGNAL-CAROTINOID_METABOLISM	PLANT_SIGNAL-CAROTENOID_BIOSYNTHESIS# PGPT	PGPT0007495-cruC-K14597	0	1	0	0
PGPT0007510	DIRECT_EFFECTS	PHYTOHORMONE|PLANT_SIGNAL_PRODUCTION	PLANT_SIGNAL-OTHER_TERPENOID|DERIVATE_PRODUCTION	PLANT_SIGNAL-CAROTINOID_METABOLISM	PLANT_SIGNAL-CAROTENOID_BIOSYNTHESIS# PGPT	PGPT0007510-cruH-K22895	0	1	0	0
PGPT0007520	DIRECT_EFFECTS	PHYTOHORMONE|PLANT_SIGNAL_PRODUCTION	PLANT_SIGNAL-OTHER_TERPENOID|DERIVATE_PRODUCTION	PLANT_SIGNAL-TERPENOID_DERIVATE_METABOLISM	PLANT_SIGNAL-TERPENOID_BACKBONE_BIOSYNTHESIS# PGPT	PGPT0007520-ispA-K00795	0	1	1	1
PGPT0007525	DIRECT_EFFECTS	PHYTOHORMONE|PLANT_SIGNAL_PRODUCTION	PLANT_SIGNAL-OTHER_TERPENOID|DERIVATE_PRODUCTION	PLANT_SIGNAL-TERPENOID_DERIVATE_METABOLISM	PLANT_SIGNAL-TERPENOID_BACKBONE_BIOSYNTHESIS# PGPT	PGPT0007525-ispB-K02523	1	1	1	1
PGPT0007530	DIRECT_EFFECTS	PHYTOHORMONE|PLANT_SIGNAL_PRODUCTION	PLANT_SIGNAL-OTHER_TERPENOID|DERIVATE_PRODUCTION	PLANT_SIGNAL-TERPENOID_DERIVATE_METABOLISM	PLANT_SIGNAL-TERPENOID_BACKBONE_BIOSYNTHESIS# PGPT	PGPT0007530-idi-K01823	0	0	0	1
PGPT0007535	DIRECT_EFFECTS	PHYTOHORMONE|PLANT_SIGNAL_PRODUCTION	PLANT_SIGNAL-OTHER_TERPENOID|DERIVATE_PRODUCTION	PLANT_SIGNAL-TERPENOID_DERIVATE_METABOLISM	PLANT_SIGNAL-TERPENOID_BACKBONE_BIOSYNTHESIS# PGPT	PGPT0007535-uppS-K12503	1	0	0	0
PGPT0007550	DIRECT_EFFECTS	PHYTOHORMONE|PLANT_SIGNAL_PRODUCTION	PLANT_SIGNAL-OTHER_TERPENOID|DERIVATE_PRODUCTION	PLANT_SIGNAL-TERPENOID_DERIVATE_METABOLISM	PLANT_SIGNAL-TERPENOID_BACKBONE_BIOSYNTHESIS# PGPT	PGPT0007550-idsA-K13787	1	0	0	0
PGPT0007580	DIRECT_EFFECTS	PHYTOHORMONE|PLANT_SIGNAL_PRODUCTION	PLANT_SIGNAL-OTHER_TERPENOID|DERIVATE_PRODUCTION	PLANT_SIGNAL-TERPENOID_DERIVATE_METABOLISM	PLANT_SIGNAL-TERPENOID-ISOPENTENYL_DIPHOSPHATE|IPP_PATHWAY# PGPT	PGPT0007580-gcpE|ispG-K03526	1	1	1	1
PGPT0007585	DIRECT_EFFECTS	PHYTOHORMONE|PLANT_SIGNAL_PRODUCTION	PLANT_SIGNAL-OTHER_TERPENOID|DERIVATE_PRODUCTION	PLANT_SIGNAL-TERPENOID_DERIVATE_METABOLISM	PLANT_SIGNAL-TERPENOID-ISOPENTENYL_DIPHOSPHATE|IPP_PATHWAY# PGPT	PGPT0007585-ispC|dxr-K00099	2	1	1	0
PGPT0007590	DIRECT_EFFECTS	PHYTOHORMONE|PLANT_SIGNAL_PRODUCTION	PLANT_SIGNAL-OTHER_TERPENOID|DERIVATE_PRODUCTION	PLANT_SIGNAL-TERPENOID_DERIVATE_METABOLISM	PLANT_SIGNAL-TERPENOID-ISOPENTENYL_DIPHOSPHATE|IPP_PATHWAY# PGPT	PGPT0007590-ispD-K00991	2	1	0	1
PGPT0007595	DIRECT_EFFECTS	PHYTOHORMONE|PLANT_SIGNAL_PRODUCTION	PLANT_SIGNAL-OTHER_TERPENOID|DERIVATE_PRODUCTION	PLANT_SIGNAL-TERPENOID_DERIVATE_METABOLISM	PLANT_SIGNAL-TERPENOID-ISOPENTENYL_DIPHOSPHATE|IPP_PATHWAY# PGPT	PGPT0007595-ispF-K01770	1	2	2	3
PGPT0007600	DIRECT_EFFECTS	PHYTOHORMONE|PLANT_SIGNAL_PRODUCTION	PLANT_SIGNAL-OTHER_TERPENOID|DERIVATE_PRODUCTION	PLANT_SIGNAL-TERPENOID_DERIVATE_METABOLISM	PLANT_SIGNAL-TERPENOID-ISOPENTENYL_DIPHOSPHATE|IPP_PATHWAY# PGPT	PGPT0007600-ispDF-K12506	0	0	1	0
PGPT0007605	DIRECT_EFFECTS	PHYTOHORMONE|PLANT_SIGNAL_PRODUCTION	PLANT_SIGNAL-OTHER_TERPENOID|DERIVATE_PRODUCTION	PLANT_SIGNAL-TERPENOID_DERIVATE_METABOLISM	PLANT_SIGNAL-TERPENOID-ISOPENTENYL_DIPHOSPHATE|IPP_PATHWAY# PGPT	PGPT0007605-ispE-K00919	1	1	1	2
PGPT0007615	DIRECT_EFFECTS	PHYTOHORMONE|PLANT_SIGNAL_PRODUCTION	PLANT_SIGNAL-OTHER_TERPENOID|DERIVATE_PRODUCTION	PLANT_SIGNAL-TERPENOID_DERIVATE_METABOLISM	PLANT_SIGNAL-TERPENOID-ISOPENTENYL_DIPHOSPHATE|IPP_PATHWAY# PGPT	PGPT0007615-ispH|lytB-K03527	4	3	3	2
PGPT0007630	DIRECT_EFFECTS	PHYTOHORMONE|PLANT_SIGNAL_PRODUCTION	PHYTOHORMONE-GAMMA-AMINOBUTYRIC_ACID|GABA_PRODUCTION	PHYTOHORMONE-GABA_METABOLISM	PHYTOHORMONE-GABA_BIOSYNTHESIS# PGPT	PGPT0007630-gadA|gadB-K01580	0	1	0	0
PGPT0007637	DIRECT_EFFECTS	PHYTOHORMONE|PLANT_SIGNAL_PRODUCTION	PHYTOHORMONE-GAMMA-AMINOBUTYRIC_ACID|GABA_PRODUCTION	PHYTOHORMONE-GABA_METABOLISM	PHYTOHORMONE-GABA_BIOSYNTHESIS# PGPT	PGPT0007637-puuB|ordL-K09471	2	0	1	0
PGPT0007641	DIRECT_EFFECTS	PHYTOHORMONE|PLANT_SIGNAL_PRODUCTION	PHYTOHORMONE-GAMMA-AMINOBUTYRIC_ACID|GABA_PRODUCTION	PHYTOHORMONE-GABA_METABOLISM	PHYTOHORMONE-GABA_BIOSYNTHESIS# PGPT	PGPT0007641-aofH-K00274	1	0	1	0
PGPT0007660	DIRECT_EFFECTS	PHYTOHORMONE|PLANT_SIGNAL_PRODUCTION	PHYTOHORMONE-GAMMA-AMINOBUTYRIC_ACID|GABA_PRODUCTION	PHYTOHORMONE-GABA_METABOLISM	PHYTOHORMONE-GABA_CONVERSION# PGPT	PGPT0007660-gabT-K07250	1	0	0	0
PGPT0007670	DIRECT_EFFECTS	PHYTOHORMONE|PLANT_SIGNAL_PRODUCTION	PLANT_SIGNAL-PHOSPHOLIPID_PRODUCTION	PLANT_SIGNAL-PHOSPOLIPID_METABOLISM	PLANT_SIGNAL-PHOSPHOLIPID|CHOLESTEROL_TRANSPORT# PGPT	PGPT0007670-mlaC-K07323	0	2	0	1
PGPT0007675	DIRECT_EFFECTS	PHYTOHORMONE|PLANT_SIGNAL_PRODUCTION	PLANT_SIGNAL-PHOSPHOLIPID_PRODUCTION	PLANT_SIGNAL-PHOSPOLIPID_METABOLISM	PLANT_SIGNAL-PHOSPHOLIPID|CHOLESTEROL_TRANSPORT# PGPT	PGPT0007675-mlaB-K07122	0	1	0	0
PGPT0007680	DIRECT_EFFECTS	PHYTOHORMONE|PLANT_SIGNAL_PRODUCTION	PLANT_SIGNAL-PHOSPHOLIPID_PRODUCTION	PLANT_SIGNAL-PHOSPOLIPID_METABOLISM	PLANT_SIGNAL-CYCLOPROPANE-FATTY-ACYL-PHOSPHOLIPID_BIOSYNTHESIS	PGPT0007680-cfa-K00574	1	1	9	1
PGPT0007685	DIRECT_EFFECTS	PHYTOHORMONE|PLANT_SIGNAL_PRODUCTION	PLANT_SIGNAL-PHOSPHOLIPID_PRODUCTION	PLANT_SIGNAL-PHOSPOLIPID_METABOLISM	PLANT_SIGNAL-CYTIDINE_DIPHOSPHATE-DIACYLGLYCEROL-PHOSPOLIPID_BIOSYNTHESIS# PGPT	PGPT0007685-cdsA|ynbB-K00981	1	1	3	0
PGPT0007695	DIRECT_EFFECTS	PHYTOHORMONE|PLANT_SIGNAL_PRODUCTION	PLANT_SIGNAL-PHOSPHOLIPID_PRODUCTION	PLANT_SIGNAL-PHOSPOLIPID_METABOLISM	PLANT_SIGNAL-PHOSPOLIPID-PHOSPHATIDYLSERINE_BIOSYNTHESIS# PGPT	PGPT0007695-CHO1|pssA-K17103	0	2	1	0
PGPT0007700	DIRECT_EFFECTS	PHYTOHORMONE|PLANT_SIGNAL_PRODUCTION	PLANT_SIGNAL-PHOSPHOLIPID_PRODUCTION	PLANT_SIGNAL-PHOSPOLIPID_METABOLISM	PLANT_SIGNAL-PHOSPOLIPID-PHOSPHATIDYLETHANOLAMINE_BIOSYNTHESIS# PGPT	PGPT0007700-psd|PISD-K01613	0	1	1	2
PGPT0007705	DIRECT_EFFECTS	PHYTOHORMONE|PLANT_SIGNAL_PRODUCTION	PLANT_SIGNAL-PHOSPHOLIPID_PRODUCTION	PLANT_SIGNAL-PHOSPOLIPID_METABOLISM	PLANT_SIGNAL-PHOSPOLIPID-PHOSPHATIDYLGLYCEROL_BIOSYNTHESIS# PGPT	PGPT0007705-pgsA|PGS1-K00995	2	1	1	2
PGPT0007710	DIRECT_EFFECTS	PHYTOHORMONE|PLANT_SIGNAL_PRODUCTION	PLANT_SIGNAL-PHOSPHOLIPID_PRODUCTION	PLANT_SIGNAL-PHOSPOLIPID_METABOLISM	PLANT_SIGNAL-PHOSPOLIPID-PHOSPHATIDYLGLYCEROL_BIOSYNTHESIS# PGPT	PGPT0007710-pgpA-K01095	0	1	0	0
PGPT0007720	DIRECT_EFFECTS	PHYTOHORMONE|PLANT_SIGNAL_PRODUCTION	PLANT_SIGNAL-PHOSPHOLIPID_PRODUCTION	PLANT_SIGNAL-PHOSPOLIPID_METABOLISM	PLANT_SIGNAL-PHOSPOLIPID-PHOSPHATIDYLGLYCEROL_BIOSYNTHESIS# PGPT	PGPT0007720-pgpC-K18697	1	0	0	3
PGPT0007725	DIRECT_EFFECTS	PHYTOHORMONE|PLANT_SIGNAL_PRODUCTION	PLANT_SIGNAL-PHOSPHOLIPID_PRODUCTION	PLANT_SIGNAL-PHOSPOLIPID_METABOLISM	PLANT_SIGNAL-PHOSPOLIPID-CARDIOLIPIN_BIOSYNTHESIS# PGPT	PGPT0007725-clsA_B|ybhO|ywiE-K06131	1	3	3	3
PGPT0007730	DIRECT_EFFECTS	PHYTOHORMONE|PLANT_SIGNAL_PRODUCTION	PLANT_SIGNAL-PHOSPHOLIPID_PRODUCTION	PLANT_SIGNAL-PHOSPOLIPID_METABOLISM	PLANT_SIGNAL-PHOSPOLIPID-CARDIOLIPIN_BIOSYNTHESIS# PGPT	PGPT0007730-clsC|ymdC-K06132	0	2	0	0
PGPT0007735	DIRECT_EFFECTS	PHYTOHORMONE|PLANT_SIGNAL_PRODUCTION	PLANT_SIGNAL-PHOSPHOLIPID_PRODUCTION	PLANT_SIGNAL-PHOSPOLIPID_METABOLISM	PLANT_SIGNAL-PHOSPOLIPID-CARDIOLIPIN_BIOSYNTHESIS# PGPT	PGPT0007735-pgsA-K08744	1	1	2	0
PGPT0007740	DIRECT_EFFECTS	PHYTOHORMONE|PLANT_SIGNAL_PRODUCTION	PLANT_SIGNAL-PHOSPHOLIPID_PRODUCTION	PLANT_SIGNAL-PHOSPOLIPID_METABOLISM	PLANT_SIGNAL-PHOSPOLIPID-PHOSPHATIDYLCHOLINE_BIOSYNTHESIS# PGPT	PGPT0007740-pmtA-K00570	0	0	2	0
PGPT0007750	DIRECT_EFFECTS	PHYTOHORMONE|PLANT_SIGNAL_PRODUCTION	PLANT_SIGNAL-BRANCHING_INHIBITION	PLANT_DEBRANCHING-SPERMIDINE|PUTRESCINE_METABOLISM	PLANT_DEBRANCHING-SPERMIDINE_BIOSYNTHESIS# PGPT	PGPT0007750-speE|SRM|SPEC_3|SPSD-K00797	3	5	0	1
PGPT0007755	DIRECT_EFFECTS	PHYTOHORMONE|PLANT_SIGNAL_PRODUCTION	PLANT_SIGNAL-BRANCHING_INHIBITION	PLANT_DEBRANCHING-SPERMIDINE|PUTRESCINE_METABOLISM	PLANT_DEBRANCHING-SPERMIDINE_BIOSYNTHESIS# PGPT	PGPT0007755-gsp-K01460	0	0	0	4
PGPT0007760	DIRECT_EFFECTS	PHYTOHORMONE|PLANT_SIGNAL_PRODUCTION	PLANT_SIGNAL-BRANCHING_INHIBITION	PLANT_DEBRANCHING-SPERMIDINE|PUTRESCINE_METABOLISM	PLANT_DEBRANCHING-SPERMIDINE_BIOSYNTHESIS# PGPT	PGPT0007760-speD-K01611	0	0	0	2
PGPT0007765	DIRECT_EFFECTS	BIO-FERTILIZATION	IRON_ACQUISITION	IRON_ACQUISITION-SIDEROPHORES	ALCALIGIN_METABOLISM# PGPT	PGPT0007765-speC|speF|ODC1-K01581	0	0	1	1
PGPT0007770	DIRECT_EFFECTS	PHYTOHORMONE|PLANT_SIGNAL_PRODUCTION	PLANT_SIGNAL-BRANCHING_INHIBITION	PLANT_DEBRANCHING-SPERMIDINE|PUTRESCINE_METABOLISM	PLANT_DEBRANCHING-PUTRESCINE_BIOSYNTHESIS# PGPT	PGPT0007770-speA-K01585	0	0	0	2
PGPT0007775	DIRECT_EFFECTS	PHYTOHORMONE|PLANT_SIGNAL_PRODUCTION	PLANT_SIGNAL-BRANCHING_INHIBITION	PLANT_DEBRANCHING-SPERMIDINE|PUTRESCINE_METABOLISM	PLANT_DEBRANCHING-PUTRESCINE_BIOSYNTHESIS# PGPT	PGPT0007775-speB-K01480	0	0	1	0
PGPT0007780	DIRECT_EFFECTS	PHYTOHORMONE|PLANT_SIGNAL_PRODUCTION	PLANT_SIGNAL-BRANCHING_INHIBITION	PLANT_DEBRANCHING-SPERMIDINE|PUTRESCINE_METABOLISM	PLANT_DEBRANCHING-PUTRESCINE_BIOSYNTHESIS# PGPT	PGPT0007780-ldcC|cadA-K01582	0	0	0	1
PGPT0007785	DIRECT_EFFECTS	PHYTOHORMONE|PLANT_SIGNAL_PRODUCTION	PLANT_SIGNAL-BRANCHING_INHIBITION	PLANT_DEBRANCHING-SPERMIDINE|PUTRESCINE_METABOLISM	PLANT_DEBRANCHING-N1-|N8-ACETYLSPERMIDINE_FORMATION# PGPT	PGPT0007785-paiA-K22441	1	2	2	1
PGPT0007790	DIRECT_EFFECTS	PHYTOHORMONE|PLANT_SIGNAL_PRODUCTION	PLANT_SIGNAL-BRANCHING_INHIBITION	PLANT_DEBRANCHING-SPERMIDINE|PUTRESCINE_METABOLISM	PLANT_DEBRANCHING-N1-|N8-ACETYLSPERMIDINE_FORMATION# PGPT	PGPT0007790-speG-K00657	0	1	1	1
PGPT0007795	DIRECT_EFFECTS	PHYTOHORMONE|PLANT_SIGNAL_PRODUCTION	PLANT_SIGNAL-BRANCHING_INHIBITION	PLANT_DEBRANCHING-SPERMIDINE|PUTRESCINE_METABOLISM	PLANT_DEBRANCHING-PUTRESCINE_TRANSPORT# PGPT	PGPT0007795-puuP-K14052	0	0	0	1
PGPT0007800	DIRECT_EFFECTS	PHYTOHORMONE|PLANT_SIGNAL_PRODUCTION	PLANT_SIGNAL-BRANCHING_INHIBITION	PLANT_DEBRANCHING-SPERMIDINE|PUTRESCINE_METABOLISM	PLANT_DEBRANCHING-PUTRESCINE_TRANSPORT# PGPT	PGPT0007800-putE-K03756	0	0	0	2
PGPT0007805	DIRECT_EFFECTS	PHYTOHORMONE|PLANT_SIGNAL_PRODUCTION	PLANT_SIGNAL-BRANCHING_INHIBITION	PLANT_DEBRANCHING-SPERMIDINE|PUTRESCINE_METABOLISM	PLANT_DEBRANCHING-PUTRESCINE_TRANSPORT# PGPT	PGPT0007805-potF-K11073	0	0	1	1
PGPT0007810	DIRECT_EFFECTS	PHYTOHORMONE|PLANT_SIGNAL_PRODUCTION	PLANT_SIGNAL-BRANCHING_INHIBITION	PLANT_DEBRANCHING-SPERMIDINE|PUTRESCINE_METABOLISM	PLANT_DEBRANCHING-PUTRESCINE_TRANSPORT# PGPT	PGPT0007810-potG-K11076	0	0	1	1
PGPT0007815	DIRECT_EFFECTS	PHYTOHORMONE|PLANT_SIGNAL_PRODUCTION	PLANT_SIGNAL-BRANCHING_INHIBITION	PLANT_DEBRANCHING-SPERMIDINE|PUTRESCINE_METABOLISM	PLANT_DEBRANCHING-PUTRESCINE_TRANSPORT# PGPT	PGPT0007815-potI-K11074	0	0	1	1
PGPT0007820	DIRECT_EFFECTS	PHYTOHORMONE|PLANT_SIGNAL_PRODUCTION	PLANT_SIGNAL-BRANCHING_INHIBITION	PLANT_DEBRANCHING-SPERMIDINE|PUTRESCINE_METABOLISM	PLANT_DEBRANCHING-PUTRESCINE_TRANSPORT# PGPT	PGPT0007820-potH-K11075	0	0	1	2
PGPT0007825	DIRECT_EFFECTS	PHYTOHORMONE|PLANT_SIGNAL_PRODUCTION	PLANT_SIGNAL-BRANCHING_INHIBITION	PLANT_DEBRANCHING-SPERMIDINE|PUTRESCINE_METABOLISM	PLANT_DEBRANCHING-SPERMIDINE|PUTRESCINE_TRANSPORT# PGPT	PGPT0007825-potD-K11069	1	0	0	0
PGPT0007830	DIRECT_EFFECTS	PHYTOHORMONE|PLANT_SIGNAL_PRODUCTION	PLANT_SIGNAL-BRANCHING_INHIBITION	PLANT_DEBRANCHING-SPERMIDINE|PUTRESCINE_METABOLISM	PLANT_DEBRANCHING-SPERMIDINE|PUTRESCINE_TRANSPORT# PGPT	PGPT0007830-potC-K11070	1	0	0	1
PGPT0007835	DIRECT_EFFECTS	PHYTOHORMONE|PLANT_SIGNAL_PRODUCTION	PLANT_SIGNAL-BRANCHING_INHIBITION	PLANT_DEBRANCHING-SPERMIDINE|PUTRESCINE_METABOLISM	PLANT_DEBRANCHING-SPERMIDINE|PUTRESCINE_TRANSPORT# PGPT	PGPT0007835-potB-K11071	1	0	0	1
PGPT0007840	DIRECT_EFFECTS	PHYTOHORMONE|PLANT_SIGNAL_PRODUCTION	PLANT_SIGNAL-BRANCHING_INHIBITION	PLANT_DEBRANCHING-SPERMIDINE|PUTRESCINE_METABOLISM	PLANT_DEBRANCHING-SPERMIDINE|PUTRESCINE_TRANSPORT# PGPT	PGPT0007840-potA-K11072	1	0	0	1
PGPT0007845	DIRECT_EFFECTS	PHYTOHORMONE|PLANT_SIGNAL_PRODUCTION	PLANT_SIGNAL-BRANCHING_INHIBITION	PLANT_DEBRANCHING-SPERMIDINE|PUTRESCINE_METABOLISM	PLANT_DEBRANCHING-SPERMIDINE|PUTRESCINE_TRANSPORT# PGPT	PGPT0007845-ABC_SP_P|ydcV-K02053	1	2	4	0
PGPT0007850	DIRECT_EFFECTS	PHYTOHORMONE|PLANT_SIGNAL_PRODUCTION	PLANT_SIGNAL-BRANCHING_INHIBITION	PLANT_DEBRANCHING-SPERMIDINE|PUTRESCINE_METABOLISM	PLANT_DEBRANCHING-SPERMIDINE|PUTRESCINE_TRANSPORT# PGPT	PGPT0007850-ABC_SP_P1|ydcU-K02054	1	0	3	0
PGPT0007855	DIRECT_EFFECTS	PHYTOHORMONE|PLANT_SIGNAL_PRODUCTION	PLANT_SIGNAL-BRANCHING_INHIBITION	PLANT_DEBRANCHING-SPERMIDINE|PUTRESCINE_METABOLISM	PLANT_DEBRANCHING-SPERMIDINE|PUTRESCINE_TRANSPORT# PGPT	PGPT0007855-ABC_SP_S|ydcS-K02055	1	1	6	0
PGPT0007860	DIRECT_EFFECTS	PHYTOHORMONE|PLANT_SIGNAL_PRODUCTION	PLANT_SIGNAL-BRANCHING_INHIBITION	PLANT_DEBRANCHING-SPERMIDINE|PUTRESCINE_METABOLISM	PLANT_DEBRANCHING-SPERMIDINE|PUTRESCINE_TRANSPORT# PGPT	PGPT0007860-ABC_SP_A|ydcT-K02052	1	1	4	0
PGPT0007865	DIRECT_EFFECTS	PHYTOHORMONE|PLANT_SIGNAL_PRODUCTION	PHYTOHORMONE-GAMMA-AMINOBUTYRIC_ACID|GABA_PRODUCTION	PHYTOHORMONE-GABA_METABOLISM	PHYTOHORMONE-GABA_BIOSYNTHESIS# PGPT	PGPT0007865-spuC-K12256	2	1	3	0
PGPT0007870	DIRECT_EFFECTS	PHYTOHORMONE|PLANT_SIGNAL_PRODUCTION	PLANT_SIGNAL-BRANCHING_INHIBITION	PLANT_DEBRANCHING-SPERMIDINE|PUTRESCINE_METABOLISM	PLANT_DEBRANCHING-SPERMIDINE_DEGRADATION# PGPT	PGPT0007870-spdH-K00316	0	2	0	0
PGPT0007875	DIRECT_EFFECTS	PHYTOHORMONE|PLANT_SIGNAL_PRODUCTION	PLANT_SIGNAL-GERMINATION_STIMULATION	PLANT_GERMINATION-VITAMIN_B9|FOLATE_PRODUCTION	PLANT_GERMINATION-VITAMIN_B9|FOLATE_BIOSYNTHESIS# PGPT	PGPT0007875-folE-K01495	1	1	1	2
PGPT0007880	DIRECT_EFFECTS	PHYTOHORMONE|PLANT_SIGNAL_PRODUCTION	PLANT_SIGNAL-GERMINATION_STIMULATION	PLANT_GERMINATION-VITAMIN_B9|FOLATE_PRODUCTION	PLANT_GERMINATION-VITAMIN_B9|FOLATE_BIOSYNTHESIS# PGPT	PGPT0007880-folE2-K09007	0	1	0	1
PGPT0007885	DIRECT_EFFECTS	PHYTOHORMONE|PLANT_SIGNAL_PRODUCTION	PLANT_SIGNAL-GERMINATION_STIMULATION	PLANT_GERMINATION-VITAMIN_B9|FOLATE_PRODUCTION	PLANT_GERMINATION-VITAMIN_B9|FOLATE_BIOSYNTHESIS# PGPT	PGPT0007885-GTP_cyclohydrolase_I-K22391	1	0	0	0
PGPT0007890	DIRECT_EFFECTS	PHYTOHORMONE|PLANT_SIGNAL_PRODUCTION	PLANT_SIGNAL-GERMINATION_STIMULATION	PLANT_GERMINATION-VITAMIN_B9|FOLATE_PRODUCTION	PLANT_GERMINATION-VITAMIN_B9|FOLATE_BIOSYNTHESIS# PGPT	PGPT0007890-nudB|ntpA-K08310	0	1	0	1
PGPT0007905	DIRECT_EFFECTS	PHYTOHORMONE|PLANT_SIGNAL_PRODUCTION	PLANT_SIGNAL-GERMINATION_STIMULATION	PLANT_GERMINATION-VITAMIN_B9|FOLATE_PRODUCTION	PLANT_GERMINATION-VITAMIN_B9|FOLATE_BIOSYNTHESIS# PGPT	PGPT0007905-folB-K01633	1	1	1	1
PGPT0007910	DIRECT_EFFECTS	PHYTOHORMONE|PLANT_SIGNAL_PRODUCTION	PLANT_SIGNAL-GERMINATION_STIMULATION	PLANT_GERMINATION-VITAMIN_B9|FOLATE_PRODUCTION	PLANT_GERMINATION-VITAMIN_B9|FOLATE_BIOSYNTHESIS# PGPT	PGPT0007910-folK-K00950	1	1	1	1
PGPT0007915	DIRECT_EFFECTS	PHYTOHORMONE|PLANT_SIGNAL_PRODUCTION	PLANT_SIGNAL-GERMINATION_STIMULATION	PLANT_GERMINATION-VITAMIN_B9|FOLATE_PRODUCTION	PLANT_GERMINATION-VITAMIN_B9|FOLATE_BIOSYNTHESIS# PGPT	PGPT0007915-folP-K00796	2	1	1	2
PGPT0007920	DIRECT_EFFECTS	PHYTOHORMONE|PLANT_SIGNAL_PRODUCTION	PLANT_SIGNAL-GERMINATION_STIMULATION	PLANT_GERMINATION-VITAMIN_B9|FOLATE_PRODUCTION	PLANT_GERMINATION-VITAMIN_B9|FOLATE_BIOSYNTHESIS# PGPT	PGPT0007920-folKP-K13941	0	0	0	1
PGPT0007945	DIRECT_EFFECTS	PHYTOHORMONE|PLANT_SIGNAL_PRODUCTION	PLANT_SIGNAL-GERMINATION_STIMULATION	PLANT_GERMINATION-VITAMIN_B9|FOLATE_PRODUCTION	PLANT_GERMINATION-VITAMIN_B9|FOLATE_BIOSYNTHESIS# PGPT	PGPT0007945-folA-K00287	1	2	1	2
PGPT0007960	DIRECT_EFFECTS	PHYTOHORMONE|PLANT_SIGNAL_PRODUCTION	PLANT_SIGNAL-GERMINATION_STIMULATION	PLANT_GERMINATION-VITAMIN_B9|FOLATE_PRODUCTION	PLANT_GERMINATION-VITAMIN_B9|FOLATE_BIOSYNTHESIS# PGPT	PGPT0007960-dfrA12|dhfr-K18590	1	0	0	0
PGPT0007975	DIRECT_EFFECTS	PHYTOHORMONE|PLANT_SIGNAL_PRODUCTION	PLANT_SIGNAL-GERMINATION_STIMULATION	PLANT_GERMINATION-VITAMIN_B9|FOLATE_PRODUCTION	PLANT_GERMINATION-VITAMIN_B9|FOLATE_BIOSYNTHESIS# PGPT	PGPT0007975-folC-K11754	1	1	1	2
PGPT0007980	DIRECT_EFFECTS	PHYTOHORMONE|PLANT_SIGNAL_PRODUCTION	PLANT_SIGNAL-GERMINATION_STIMULATION	PLANT_GERMINATION-VITAMIN_B9|FOLATE_PRODUCTION	PLANT_GERMINATION-VITAMIN_B9|FOLATE_BIOSYNTHESIS# PGPT	PGPT0007980-folC2-K22099	1	0	0	0
PGPT0007985	DIRECT_EFFECTS	PHYTOHORMONE|PLANT_SIGNAL_PRODUCTION	PLANT_SIGNAL-GERMINATION_STIMULATION	PLANT_GERMINATION-VITAMIN_B9|FOLATE_PRODUCTION	PLANT_GERMINATION-VITAMIN_B9|FOLATE_BIOSYNTHESIS# PGPT	PGPT0007985-ribA-K01497	1	1	2	0
PGPT0007990	DIRECT_EFFECTS	PHYTOHORMONE|PLANT_SIGNAL_PRODUCTION	PLANT_SIGNAL-GERMINATION_STIMULATION	PLANT_GERMINATION-VITAMIN_B9|FOLATE_PRODUCTION	PLANT_GERMINATION-VITAMIN_B9|FOLATE_BIOSYNTHESIS# PGPT	PGPT0007990-ribBA-K14652	2	2	1	0
PGPT0008005	DIRECT_EFFECTS	PHYTOHORMONE|PLANT_SIGNAL_PRODUCTION	PLANT_SIGNAL-GERMINATION_STIMULATION	PLANT_GERMINATION-VITAMIN_B9|FOLATE_PRODUCTION	PLANT_GERMINATION-VITAMIN_B9|FOLATE_BIOSYNTHESIS# PGPT	PGPT0008005-pabB-K01665	0	0	0	2
PGPT0008010	DIRECT_EFFECTS	PHYTOHORMONE|PLANT_SIGNAL_PRODUCTION	PLANT_SIGNAL-GERMINATION_STIMULATION	PLANT_GERMINATION-VITAMIN_B9|FOLATE_PRODUCTION	PLANT_GERMINATION-VITAMIN_B9|FOLATE_BIOSYNTHESIS# PGPT	PGPT0008010-pabAB-K13950	3	0	0	1
PGPT0008015	DIRECT_EFFECTS	PHYTOHORMONE|PLANT_SIGNAL_PRODUCTION	PLANT_SIGNAL-GERMINATION_STIMULATION	PLANT_GERMINATION-VITAMIN_B9|FOLATE_PRODUCTION	PLANT_GERMINATION-VITAMIN_B9|FOLATE_BIOSYNTHESIS# PGPT	PGPT0008015-pabBC-K03342	0	1	0	0
PGPT0008020	DIRECT_EFFECTS	PHYTOHORMONE|PLANT_SIGNAL_PRODUCTION	PLANT_SIGNAL-GERMINATION_STIMULATION	PLANT_GERMINATION-VITAMIN_B9|FOLATE_PRODUCTION	PLANT_GERMINATION-VITAMIN_B9|FOLATE_BIOSYNTHESIS# PGPT	PGPT0008020-pabC-K02619	0	0	0	1
PGPT0008065	DIRECT_EFFECTS	PHYTOHORMONE|PLANT_SIGNAL_PRODUCTION	PLANT_SIGNAL-GERMINATION_STIMULATION	PLANT_GERMINATION-VITAMIN_B9|FOLATE_PRODUCTION	PLANT_GERMINATION-VITAMIN_B9|FOLATE_BIOSYNTHESIS# PGPT	PGPT0008065-fhs-K01938	1	0	1	0
PGPT0008075	DIRECT_EFFECTS	PHYTOHORMONE|PLANT_SIGNAL_PRODUCTION	PLANT_SIGNAL-GERMINATION_STIMULATION	PLANT_GERMINATION-VITAMIN_B9|FOLATE_PRODUCTION	PLANT_GERMINATION-VITAMIN_B9|FOLATE_BIOSYNTHESIS# PGPT	PGPT0008075-folD-K01491	1	1	1	2
PGPT0008090	DIRECT_EFFECTS	PHYTOHORMONE|PLANT_SIGNAL_PRODUCTION	PLANT_SIGNAL-GERMINATION_STIMULATION	PLANT_GERMINATION-VITAMIN_B9|FOLATE_PRODUCTION	PLANT_GERMINATION-VITAMIN_B9|FOLATE_BIOSYNTHESIS# PGPT	PGPT0008090-glyA-K00600	1	3	2	2
PGPT0008095	DIRECT_EFFECTS	PHYTOHORMONE|PLANT_SIGNAL_PRODUCTION	PLANT_SIGNAL-GERMINATION_STIMULATION	PLANT_GERMINATION-VITAMIN_B9|FOLATE_PRODUCTION	PLANT_GERMINATION-VITAMIN_B9|FOLATE_BIOSYNTHESIS# PGPT	PGPT0008095-purN-K11175	1	1	1	2
PGPT0008100	DIRECT_EFFECTS	PHYTOHORMONE|PLANT_SIGNAL_PRODUCTION	PLANT_SIGNAL-GERMINATION_STIMULATION	PLANT_GERMINATION-VITAMIN_B9|FOLATE_PRODUCTION	PLANT_GERMINATION-VITAMIN_B9|FOLATE_BIOSYNTHESIS# PGPT	PGPT0008100-purT-K08289	0	1	0	0
PGPT0008110	DIRECT_EFFECTS	PHYTOHORMONE|PLANT_SIGNAL_PRODUCTION	PLANT_SIGNAL-GERMINATION_STIMULATION	PLANT_GERMINATION-VITAMIN_B9|FOLATE_PRODUCTION	PLANT_GERMINATION-VITAMIN_B9|FOLATE_BIOSYNTHESIS# PGPT	PGPT0008110-purH-K00602	1	1	1	2
PGPT0008125	DIRECT_EFFECTS	PHYTOHORMONE|PLANT_SIGNAL_PRODUCTION	PLANT_SIGNAL-GERMINATION_STIMULATION	PLANT_GERMINATION-VITAMIN_B9|FOLATE_PRODUCTION	PLANT_GERMINATION-VITAMIN_B9|FOLATE_BIOSYNTHESIS# PGPT	PGPT0008125-fmt-K00604	3	4	2	0
PGPT0008130	DIRECT_EFFECTS	PHYTOHORMONE|PLANT_SIGNAL_PRODUCTION	PLANT_SIGNAL-GERMINATION_STIMULATION	PLANT_GERMINATION-VITAMIN_B9|FOLATE_PRODUCTION	PLANT_GERMINATION-VITAMIN_B9|FOLATE_BIOSYNTHESIS# PGPT	PGPT0008130-gcvT-K00605	2	2	2	2
PGPT0008135	DIRECT_EFFECTS	PHYTOHORMONE|PLANT_SIGNAL_PRODUCTION	PLANT_SIGNAL-GERMINATION_STIMULATION	PLANT_GERMINATION-VITAMIN_B9|FOLATE_PRODUCTION	PLANT_GERMINATION-VITAMIN_B9|FOLATE_BIOSYNTHESIS# PGPT	PGPT0008135-metH-K00548	1	2	5	3
PGPT0008145	DIRECT_EFFECTS	PHYTOHORMONE|PLANT_SIGNAL_PRODUCTION	PLANT_SIGNAL-GERMINATION_STIMULATION	PLANT_GERMINATION-VITAMIN_B9|FOLATE_PRODUCTION	PLANT_GERMINATION-VITAMIN_B9|FOLATE_BIOSYNTHESIS# PGPT	PGPT0008145-thyA-K00560	1	2	1	2
PGPT0008155	DIRECT_EFFECTS	PHYTOHORMONE|PLANT_SIGNAL_PRODUCTION	PLANT_SIGNAL-GERMINATION_STIMULATION	PLANT_GERMINATION-VITAMIN_B9|FOLATE_PRODUCTION	PLANT_GERMINATION-VITAMIN_B9|FOLATE_BIOSYNTHESIS# PGPT	PGPT0008155-purU-K01433	1	1	1	0
PGPT0008160	DIRECT_EFFECTS	PHYTOHORMONE|PLANT_SIGNAL_PRODUCTION	PLANT_SIGNAL-GERMINATION_STIMULATION	PLANT_GERMINATION-VITAMIN_B9|FOLATE_PRODUCTION	PLANT_GERMINATION-VITAMIN_B9|FOLATE_BIOSYNTHESIS# PGPT	PGPT0008160-metF-K00297	1	1	2	1
PGPT0008170	DIRECT_EFFECTS	PHYTOHORMONE|PLANT_SIGNAL_PRODUCTION	PLANT_SIGNAL-GERMINATION_STIMULATION	PLANT_GERMINATION-VITAMIN_B9|FOLATE_PRODUCTION	PLANT_GERMINATION-VITAMIN_B9|FOLATE_BIOSYNTHESIS# PGPT	PGPT0008170-ygfA|fthC|yqgN|folN-K01934	2	1	2	3
PGPT0008180	DIRECT_EFFECTS	PHYTOHORMONE|PLANT_SIGNAL_PRODUCTION	PLANT_SIGNALLING_VOLATILES	PLANT_SIGNAL-ACETOIN|2|3-BUTANEDIOL_VOLATILE_METABOLISM	PLANT_SIGNAL-ACETOIN|2|3-BUTANEDIOL_VOLATILE_BIOSYNTHESIS# PGPT	PGPT0008180-budA|aldC|aldB|alsD-K01575	0	0	0	3
PGPT0008185	DIRECT_EFFECTS	PHYTOHORMONE|PLANT_SIGNAL_PRODUCTION	PLANT_SIGNALLING_VOLATILES	PLANT_SIGNAL-ACETOIN|2|3-BUTANEDIOL_VOLATILE_METABOLISM	PLANT_SIGNAL-ACETOIN|2|3-BUTANEDIOL_VOLATILE_BIOSYNTHESIS# PGPT	PGPT0008185-budB|ilvK|alsS|ilvB|ilvG|ilvI-K01652	1	6	4	7
PGPT0008190	DIRECT_EFFECTS	PHYTOHORMONE|PLANT_SIGNAL_PRODUCTION	PLANT_SIGNALLING_VOLATILES	PLANT_SIGNAL-ACETOIN|2|3-BUTANEDIOL_VOLATILE_METABOLISM	PLANT_SIGNAL-ACETOIN|2|3-BUTANEDIOL_VOLATILE_BIOSYNTHESIS# PGPT	PGPT0008190-budC-K18009	2	0	2	0
PGPT0008195	DIRECT_EFFECTS	PHYTOHORMONE|PLANT_SIGNAL_PRODUCTION	PLANT_SIGNALLING_VOLATILES	PLANT_SIGNAL-ACETOIN|2|3-BUTANEDIOL_VOLATILE_METABOLISM	PLANT_SIGNAL-ACETOIN|2|3-BUTANEDIOL_VOLATILE_BIOSYNTHESIS# PGPT	PGPT0008195-butA|ydjL|budC-K03366	0	0	0	2
PGPT0008205	DIRECT_EFFECTS	PHYTOHORMONE|PLANT_SIGNAL_PRODUCTION	PLANT_SIGNALLING_VOLATILES	PLANT_SIGNAL-ACETOIN|2|3-BUTANEDIOL_VOLATILE_METABOLISM	PLANT_SIGNAL-ACETOIN|2|3-BUTANEDIOL_VOLATILE_BIOSYNTHESIS# PGPT	PGPT0008205-ilvH|ilvN-K01653	1	1	1	3
PGPT0008210	DIRECT_EFFECTS	PHYTOHORMONE|PLANT_SIGNAL_PRODUCTION	PLANT_SIGNALLING_VOLATILES	PLANT_SIGNAL-ACETOIN|2|3-BUTANEDIOL_VOLATILE_METABOLISM	PLANT_SIGNAL-ACETOIN|2|3-BUTANEDIOL_VOLATILE_BIOSYNTHESIS# PGPT	PGPT0008210-ilvM-K11258	0	0	0	1
PGPT0008220	DIRECT_EFFECTS	PHYTOHORMONE|PLANT_SIGNAL_PRODUCTION	PLANT_SIGNALLING_VOLATILES	PLANT_SIGNAL-ACETOIN|2|3-BUTANEDIOL_VOLATILE_METABOLISM	PLANT_SIGNAL-ACETOIN|2|3-BUTANEDIOL_VOLATILE_BIOSYNTHESIS# PGPT	PGPT0008220-acuB-K04767	2	1	0	0
PGPT0008225	DIRECT_EFFECTS	PHYTOHORMONE|PLANT_SIGNAL_PRODUCTION	PLANT_SIGNALLING_VOLATILES	PLANT_SIGNAL-ACETOIN|2|3-BUTANEDIOL_VOLATILE_METABOLISM	PLANT_SIGNAL-ACETOIN|2|3-BUTANEDIOL_VOLATILE_BIOSYNTHESIS# PGPT	PGPT0008225-acuC-K04768	1	2	1	0
PGPT0008230	DIRECT_EFFECTS	PHYTOHORMONE|PLANT_SIGNAL_PRODUCTION	PLANT_SIGNALLING_VOLATILES	PLANT_SIGNAL-ACETOIN|2|3-BUTANEDIOL_VOLATILE_METABOLISM	PLANT_SIGNAL-ACETOIN|2|3-BUTANEDIOL_VOLATILE_BIOSYNTHESIS# PGPT	PGPT0008230-acoA-K21416	0	0	1	0
PGPT0008235	DIRECT_EFFECTS	PHYTOHORMONE|PLANT_SIGNAL_PRODUCTION	PLANT_SIGNALLING_VOLATILES	PLANT_SIGNAL-ACETOIN|2|3-BUTANEDIOL_VOLATILE_METABOLISM	PLANT_SIGNAL-ACETOIN|2|3-BUTANEDIOL_VOLATILE_BIOSYNTHESIS# PGPT	PGPT0008235-acoB-K21417	0	0	1	0
PGPT0008270	DIRECT_EFFECTS	PHYTOHORMONE|PLANT_SIGNAL_PRODUCTION	PLANT_SIGNALLING_VOLATILES	PLANT_SIGNAL-PROPANDIOL_VOLATILE_METABOLISM	PLANT_SIGNAL-1|2-PROPANDIOL_VOLATILE_BIOSYNTHESIS# PGPT	PGPT0008270-gldA|dhaD-K00005	0	0	0	1
PGPT0008275	DIRECT_EFFECTS	PHYTOHORMONE|PLANT_SIGNAL_PRODUCTION	PLANT_SIGNALLING_VOLATILES	PLANT_SIGNAL-HYDROXYACETON_VOLATILE_METABOLISM	PLANT_SIGNAL-HYDROXYACETON_VOLATILE_BIOSYNTHESIS# PGPT	PGPT0008275-yqhD-K08325	0	0	0	1
PGPT0008285	DIRECT_EFFECTS	PHYTOHORMONE|PLANT_SIGNAL_PRODUCTION	PLANT_SIGNALLING_VOLATILES	PLANT_SIGNAL-HYDROXYACETON_VOLATILE_METABOLISM	PLANT_SIGNAL-HYDROXYACETON_VOLATILE_BIOSYNTHESIS# PGPT	PGPT0008285-yghZ-K19265	1	0	1	0
PGPT0008305	DIRECT_EFFECTS	PHYTOHORMONE|PLANT_SIGNAL_PRODUCTION	PLANT_SIGNALLING_VOLATILES	PLANT_SIGNAL-VOLATILE_RELATED_METABOLISM	PLANT_SIGNAL-VOLATILE_RELATED_ALCOHOL|KETONE_PATHWAY# PGPT	PGPT0008305-adh1-K19954	0	0	1	0
PGPT0008310	DIRECT_EFFECTS	PHYTOHORMONE|PLANT_SIGNAL_PRODUCTION	PLANT_SIGNALLING_VOLATILES	PLANT_SIGNAL-VOLATILE_RELATED_METABOLISM	PLANT_SIGNAL-VOLATILE_RELATED_ALCOHOL|KETONE_PATHWAY# PGPT	PGPT0008310-bdh-K00019	0	5	3	0
PGPT0008315	DIRECT_EFFECTS	PHYTOHORMONE|PLANT_SIGNAL_PRODUCTION	PLANT_SIGNALLING_VOLATILES	PLANT_SIGNAL-VOLATILE_RELATED_METABOLISM	PLANT_SIGNAL-VOLATILE_RELATED_ALCOHOL|KETONE_PATHWAY# PGPT	PGPT0008315-hmgL-K01640	1	2	0	0
PGPT0008320	DIRECT_EFFECTS	PHYTOHORMONE|PLANT_SIGNAL_PRODUCTION	PLANT_SIGNALLING_VOLATILES	PLANT_SIGNAL-VOLATILE_RELATED_METABOLISM	PLANT_SIGNAL-VOLATILE_RELATED_ALCOHOL|KETONE_PATHWAY# PGPT	PGPT0008320-atoB-K00626	4	6	3	0
PGPT0008325	DIRECT_EFFECTS	PHYTOHORMONE|PLANT_SIGNAL_PRODUCTION	PLANT_SIGNALLING_VOLATILES	PLANT_SIGNAL-VOLATILE_RELATED_METABOLISM	PLANT_SIGNAL-VOLATILE_RELATED_ALCOHOL|KETONE_PATHWAY# PGPT	PGPT0008325-scoA-K01028	0	1	1	0
PGPT0008330	DIRECT_EFFECTS	PHYTOHORMONE|PLANT_SIGNAL_PRODUCTION	PLANT_SIGNALLING_VOLATILES	PLANT_SIGNAL-VOLATILE_RELATED_METABOLISM	PLANT_SIGNAL-VOLATILE_RELATED_ALCOHOL|KETONE_PATHWAY# PGPT	PGPT0008330-scoB-K01029	0	1	1	0
PGPT0008345	DIRECT_EFFECTS	PHYTOHORMONE|PLANT_SIGNAL_PRODUCTION	PLANT_SIGNALLING_VOLATILES	PLANT_SIGNAL-VOLATILE_RELATED_METABOLISM	PLANT_SIGNAL-VOLATILE_RELATED_FATTY_ACID_PATHWAY# PGPT	PGPT0008345-accD-K01970	2	1	2	0
PGPT0008350	DIRECT_EFFECTS	PHYTOHORMONE|PLANT_SIGNAL_PRODUCTION	PLANT_SIGNALLING_VOLATILES	PLANT_SIGNAL-VOLATILE_RELATED_METABOLISM	PLANT_SIGNAL-VOLATILE_RELATED_FATTY_ACID_PATHWAY# PGPT	PGPT0008350-fabD|bmyD-K00645	1	1	1	1
PGPT0008355	DIRECT_EFFECTS	PHYTOHORMONE|PLANT_SIGNAL_PRODUCTION	PLANT_SIGNALLING_VOLATILES	PLANT_SIGNAL-VOLATILE_RELATED_METABOLISM	PLANT_SIGNAL-VOLATILE_RELATED_FATTY_ACID_PATHWAY# PGPT	PGPT0008355-fabH-K00648	1	1	1	1
PGPT0008360	DIRECT_EFFECTS	PHYTOHORMONE|PLANT_SIGNAL_PRODUCTION	PLANT_SIGNALLING_VOLATILES	PLANT_SIGNAL-VOLATILE_RELATED_METABOLISM	PLANT_SIGNAL-VOLATILE_RELATED_FATTY_ACID_PATHWAY# PGPT	PGPT0008360-fabF-K09458	1	2	3	2
PGPT0008365	DIRECT_EFFECTS	PHYTOHORMONE|PLANT_SIGNAL_PRODUCTION	PLANT_SIGNALLING_VOLATILES	PLANT_SIGNAL-VOLATILE_RELATED_METABOLISM	PLANT_SIGNAL-VOLATILE_RELATED_FATTY_ACID_PATHWAY# PGPT	PGPT0008365-fabZ-K02372	0	1	3	1
PGPT0008370	DIRECT_EFFECTS	PHYTOHORMONE|PLANT_SIGNAL_PRODUCTION	PLANT_SIGNALLING_VOLATILES	PLANT_SIGNAL-VOLATILE_RELATED_METABOLISM	PLANT_SIGNAL-VOLATILE_RELATED_FATTY_ACID_PATHWAY# PGPT	PGPT0008370-fabI-K00208	1	2	2	1
PGPT0008380	DIRECT_EFFECTS	PHYTOHORMONE|PLANT_SIGNAL_PRODUCTION	PLANT_SIGNALLING_VOLATILES	PLANT_SIGNAL-VOLATILE_RELATED_METABOLISM	PLANT_SIGNAL-VOLATILE_RELATED_FATTY_ACID_PATHWAY# PGPT	PGPT0008380-fadD-K01897	12	12	4	1
PGPT0008385	DIRECT_EFFECTS	PHYTOHORMONE|PLANT_SIGNAL_PRODUCTION	PLANT_SIGNALLING_VOLATILES	PLANT_SIGNAL-VOLATILE_RELATED_METABOLISM	PLANT_SIGNAL-VOLATILE_RELATED_FATTY_ACID_PATHWAY# PGPT	PGPT0008385-acd-K00249	11	13	10	0
PGPT0008395	DIRECT_EFFECTS	PHYTOHORMONE|PLANT_SIGNAL_PRODUCTION	PLANT_SIGNALLING_VOLATILES	PLANT_SIGNAL-VOLATILE_RELATED_METABOLISM	PLANT_SIGNAL-VOLATILE_RELATED_FATTY_ACID_PATHWAY# PGPT	PGPT0008395-fadN-K07516	0	2	1	0
PGPT0008400	DIRECT_EFFECTS	PHYTOHORMONE|PLANT_SIGNAL_PRODUCTION	PLANT_SIGNALLING_VOLATILES	PLANT_SIGNAL-VOLATILE_RELATED_METABOLISM	PLANT_SIGNAL-VOLATILE_RELATED_FATTY_ACID_PATHWAY# PGPT	PGPT0008400-desA-K10255	0	1	0	0
PGPT0008405	DIRECT_EFFECTS	PHYTOHORMONE|PLANT_SIGNAL_PRODUCTION	PLANT_VITAMIN_PRODUCTION	PLANT_VITAMIN-MOLYBDENUM_COFACTOR_METABOLISM	PLANT_VITAMIN-MOLYBDENUM_COFACTOR_BIOSYNTHESIS	PGPT0008405-moaC_-K03637	1	1	2	2
PGPT0008410	DIRECT_EFFECTS	PHYTOHORMONE|PLANT_SIGNAL_PRODUCTION	PLANT_VITAMIN_PRODUCTION	PLANT_VITAMIN-MOLYBDENUM_COFACTOR_METABOLISM	PLANT_VITAMIN-MOLYBDENUM_COFACTOR_BIOSYNTHESIS	PGPT0008410-moaA-K03639	2	1	1	1
PGPT0008415	DIRECT_EFFECTS	PHYTOHORMONE|PLANT_SIGNAL_PRODUCTION	PLANT_VITAMIN_PRODUCTION	PLANT_VITAMIN-MOLYBDENUM_COFACTOR_METABOLISM	PLANT_VITAMIN-MOLYBDENUM_COFACTOR_BIOSYNTHESIS	PGPT0008415-moaX-K21142	1	2	2	1
PGPT0008420	DIRECT_EFFECTS	PHYTOHORMONE|PLANT_SIGNAL_PRODUCTION	PLANT_VITAMIN_PRODUCTION	PLANT_VITAMIN-MOLYBDENUM_COFACTOR_METABOLISM	PLANT_VITAMIN-MOLYBDENUM_COFACTOR_BIOSYNTHESIS	PGPT0008420-moaB-K03638	0	0	0	1
PGPT0008425	DIRECT_EFFECTS	PHYTOHORMONE|PLANT_SIGNAL_PRODUCTION	PLANT_VITAMIN_PRODUCTION	PLANT_VITAMIN-MOLYBDENUM_COFACTOR_METABOLISM	PLANT_VITAMIN-MOLYBDENUM_COFACTOR_BIOSYNTHESIS	PGPT0008425-mogA-K03831	0	1	1	2
PGPT0008430	DIRECT_EFFECTS	PHYTOHORMONE|PLANT_SIGNAL_PRODUCTION	PLANT_VITAMIN_PRODUCTION	PLANT_VITAMIN-MOLYBDENUM_COFACTOR_METABOLISM	PLANT_VITAMIN-MOLYBDENUM_COFACTOR_BIOSYNTHESIS	PGPT0008430-moeA-K03750	4	5	2	1
PGPT0008435	DIRECT_EFFECTS	PHYTOHORMONE|PLANT_SIGNAL_PRODUCTION	PLANT_VITAMIN_PRODUCTION	PLANT_VITAMIN-MOLYBDENUM_COFACTOR_METABOLISM	PLANT_VITAMIN-MOLYBDENUM_COFACTOR_TRANSPORT	PGPT0008435-modA-K02020	1	2	2	1
PGPT0008440	DIRECT_EFFECTS	PHYTOHORMONE|PLANT_SIGNAL_PRODUCTION	PLANT_VITAMIN_PRODUCTION	PLANT_VITAMIN-MOLYBDENUM_COFACTOR_METABOLISM	PLANT_VITAMIN-MOLYBDENUM_COFACTOR_TRANSPORT	PGPT0008440-modB-K02018	1	1	1	0
PGPT0008445	DIRECT_EFFECTS	PHYTOHORMONE|PLANT_SIGNAL_PRODUCTION	PLANT_VITAMIN_PRODUCTION	PLANT_VITAMIN-MOLYBDENUM_COFACTOR_METABOLISM	PLANT_VITAMIN-MOLYBDENUM_COFACTOR_TRANSPORT	PGPT0008445-modC-K02017	1	1	2	2
PGPT0008455	DIRECT_EFFECTS	PHYTOHORMONE|PLANT_SIGNAL_PRODUCTION	PLANT_VITAMIN_PRODUCTION	PLANT_VITAMIN_RELATED_HEME_METABOLISM	PLANT_VITAMIN-HEME|SIRO-BIOSYNTHESIS# PGPT	PGPT0008455-hemA2-K00643	0	0	1	0
PGPT0008460	DIRECT_EFFECTS	PHYTOHORMONE|PLANT_SIGNAL_PRODUCTION	PLANT_VITAMIN_PRODUCTION	PLANT_VITAMIN_RELATED_HEME_METABOLISM	PLANT_VITAMIN-HEME|SIRO-BIOSYNTHESIS# PGPT	PGPT0008460-gltX-K01885	1	3	4	3
PGPT0008465	DIRECT_EFFECTS	PHYTOHORMONE|PLANT_SIGNAL_PRODUCTION	PLANT_VITAMIN_PRODUCTION	PLANT_VITAMIN_RELATED_HEME_METABOLISM	PLANT_VITAMIN-HEME|SIRO-BIOSYNTHESIS	PGPT0008465-hemE-K01599	1	1	1	1
PGPT0008470	DIRECT_EFFECTS	PHYTOHORMONE|PLANT_SIGNAL_PRODUCTION	PLANT_VITAMIN_PRODUCTION	PLANT_VITAMIN_RELATED_HEME_METABOLISM	PLANT_VITAMIN-HEME|SIRO-BIOSYNTHESIS	PGPT0008470-hemG-K00230	0	0	0	1
PGPT0008475	DIRECT_EFFECTS	PHYTOHORMONE|PLANT_SIGNAL_PRODUCTION	PLANT_VITAMIN_PRODUCTION	PLANT_VITAMIN_RELATED_HEME_METABOLISM	PLANT_VITAMIN-HEME|SIRO-BIOSYNTHESIS	PGPT0008475-hemY-K00231	2	0	1	0
PGPT0008480	DIRECT_EFFECTS	PHYTOHORMONE|PLANT_SIGNAL_PRODUCTION	PLANT_VITAMIN_PRODUCTION	PLANT_VITAMIN_RELATED_HEME_METABOLISM	PLANT_VITAMIN-HEME|SIRO-BIOSYNTHESIS	PGPT0008480-hemJ-K08973	0	1	1	0
PGPT0008485	DIRECT_EFFECTS	PHYTOHORMONE|PLANT_SIGNAL_PRODUCTION	PLANT_VITAMIN_PRODUCTION	PLANT_VITAMIN_RELATED_HEME_METABOLISM	PLANT_VITAMIN-HEME|SIRO-BIOSYNTHESIS	PGPT0008485-hemH|ywfI-K01772	1	1	1	1
PGPT0008490	DIRECT_EFFECTS	PHYTOHORMONE|PLANT_SIGNAL_PRODUCTION	PLANT_VITAMIN_PRODUCTION	PLANT_VITAMIN_RELATED_HEME_METABOLISM	PLANT_VITAMIN-HEME|SIRO-BIOSYNTHESIS# PGPT	PGPT0008490-hemQ-K00435	1	0	0	0
PGPT0008505	DIRECT_EFFECTS	PHYTOHORMONE|PLANT_SIGNAL_PRODUCTION	PLANT_VITAMIN_PRODUCTION	PLANT_VITAMIN_RELATED_HEME_METABOLISM	PLANT_VITAMIN-HEME|SIRO-BIOSYNTHESIS	PGPT0008505-ahbAB-K22225	0	1	0	0
PGPT0008520	DIRECT_EFFECTS	PHYTOHORMONE|PLANT_SIGNAL_PRODUCTION	PLANT_VITAMIN_PRODUCTION	PLANT_VITAMIN_RELATED_HEME_METABOLISM	PLANT_VITAMIN-HEME|SIRO-BIOSYNTHESIS	PGPT0008520-ctaB|cyoE-K02257	0	1	1	1
PGPT0008525	DIRECT_EFFECTS	PHYTOHORMONE|PLANT_SIGNAL_PRODUCTION	PLANT_VITAMIN_PRODUCTION	PLANT_VITAMIN_RELATED_HEME_METABOLISM	PLANT_VITAMIN-HEME|SIRO-BIOSYNTHESIS	PGPT0008525-ctaA-K02259	1	1	1	0
PGPT0008555	DIRECT_EFFECTS	PHYTOHORMONE|PLANT_SIGNAL_PRODUCTION	PLANT_VITAMIN_PRODUCTION	PLANT_VITAMIN_B2|RIBOFLAVIN_METABOLISM	PLANT_VITAMIN_B2|RIBOFLAVIN_BIOSYNTHESIS# PGPT	PGPT0008555-ribD-K11752	1	1	1	1
PGPT0008560	DIRECT_EFFECTS	PHYTOHORMONE|PLANT_SIGNAL_PRODUCTION	PLANT_VITAMIN_PRODUCTION	PLANT_VITAMIN_B2|RIBOFLAVIN_METABOLISM	PLANT_VITAMIN_B2|RIBOFLAVIN_BIOSYNTHESIS# PGPT	PGPT0008560-RIB7|arfC-K14654	2	0	0	0
PGPT0008565	DIRECT_EFFECTS	PHYTOHORMONE|PLANT_SIGNAL_PRODUCTION	PLANT_VITAMIN_PRODUCTION	PLANT_VITAMIN_B2|RIBOFLAVIN_METABOLISM	PLANT_VITAMIN_B2|RIBOFLAVIN_BIOSYNTHESIS# PGPT	PGPT0008565-RIB2|PUS8-K14655	0	0	0	2
PGPT0008580	DIRECT_EFFECTS	PHYTOHORMONE|PLANT_SIGNAL_PRODUCTION	PLANT_VITAMIN_PRODUCTION	PLANT_VITAMIN_B2|RIBOFLAVIN_METABOLISM	PLANT_VITAMIN_B2|RIBOFLAVIN_BIOSYNTHESIS# PGPT	PGPT0008580-ybjI-K20861	0	0	0	3
PGPT0008585	DIRECT_EFFECTS	PHYTOHORMONE|PLANT_SIGNAL_PRODUCTION	PLANT_VITAMIN_PRODUCTION	PLANT_VITAMIN_B2|RIBOFLAVIN_METABOLISM	PLANT_VITAMIN_B2|RIBOFLAVIN_BIOSYNTHESIS# PGPT	PGPT0008585-yigB-K20862	1	0	0	2
PGPT0008595	DIRECT_EFFECTS	PHYTOHORMONE|PLANT_SIGNAL_PRODUCTION	PLANT_VITAMIN_PRODUCTION	PLANT_VITAMIN_B2|RIBOFLAVIN_METABOLISM	PLANT_VITAMIN_B2|RIBOFLAVIN_BIOSYNTHESIS# PGPT	PGPT0008595-ycsE|yitU|ywtE-K21064	1	0	0	0
PGPT0008600	DIRECT_EFFECTS	PHYTOHORMONE|PLANT_SIGNAL_PRODUCTION	PLANT_VITAMIN_PRODUCTION	PLANT_VITAMIN_B2|RIBOFLAVIN_METABOLISM	PLANT_VITAMIN_B2|RIBOFLAVIN_BIOSYNTHESIS# PGPT	PGPT0008600-ribB|RIB3-K02858	0	1	0	1
PGPT0008605	DIRECT_EFFECTS	PHYTOHORMONE|PLANT_SIGNAL_PRODUCTION	PLANT_VITAMIN_PRODUCTION	PLANT_VITAMIN_B2|RIBOFLAVIN_METABOLISM	PLANT_VITAMIN_B2|RIBOFLAVIN_BIOSYNTHESIS# PGPT	PGPT0008605-ribH|RIB4-K00794	1	1	1	1
PGPT0008610	DIRECT_EFFECTS	PHYTOHORMONE|PLANT_SIGNAL_PRODUCTION	PLANT_VITAMIN_PRODUCTION	PLANT_VITAMIN_B2|RIBOFLAVIN_METABOLISM	PLANT_VITAMIN_B2|RIBOFLAVIN_BIOSYNTHESIS# PGPT	PGPT0008610-ribE|RIB5|ribC-K00793	1	1	1	1
PGPT0008625	DIRECT_EFFECTS	PHYTOHORMONE|PLANT_SIGNAL_PRODUCTION	PLANT_VITAMIN_PRODUCTION	PLANT_VITAMIN_B2|RIBOFLAVIN_METABOLISM	PLANT_VITAMIN_B2|RIBOFLAVIN_BIOSYNTHESIS# PGPT	PGPT0008625-ribF-K11753	2	2	2	2
PGPT0008680	DIRECT_EFFECTS	PHYTOHORMONE|PLANT_SIGNAL_PRODUCTION	PLANT_VITAMIN_PRODUCTION	PLANT_VITAMIN_B2|RIBOFLAVIN_METABOLISM	PLANT_VITAMIN_B2|RIBOFLAVIN_BIOSYNTHESIS# PGPT	PGPT0008680-NUDT23-K18453	0	1	0	0
PGPT0008685	DIRECT_EFFECTS	PHYTOHORMONE|PLANT_SIGNAL_PRODUCTION	PLANT_VITAMIN_PRODUCTION	PLANT_VITAMIN_B2|RIBOFLAVIN_METABOLISM	PLANT_VITAMIN_B2|RIBOFLAVIN_BIOSYNTHESIS# PGPT	PGPT0008685-hpaC-K00484	0	0	0	1
PGPT0008700	DIRECT_EFFECTS	PHYTOHORMONE|PLANT_SIGNAL_PRODUCTION	PLANT_VITAMIN_PRODUCTION	PLANT_VITAMIN_B2|RIBOFLAVIN_METABOLISM	PLANT_VITAMIN_B2|RIBOFLAVIN_BIOSYNTHESIS# PGPT	PGPT0008700-C1_hpah-K23470	0	2	0	0
PGPT0008705	DIRECT_EFFECTS	PHYTOHORMONE|PLANT_SIGNAL_PRODUCTION	PLANT_VITAMIN_PRODUCTION	PLANT_VITAMIN_B2|RIBOFLAVIN_METABOLISM	PLANT_VITAMIN_B2|RIBOFLAVIN_BIOSYNTHESIS# PGPT	PGPT0008705-fre|ubiB-K05368	0	0	0	2
PGPT0008735	DIRECT_EFFECTS	PHYTOHORMONE|PLANT_SIGNAL_PRODUCTION	PLANT_VITAMIN_PRODUCTION	PLANT_VITAMIN_B5|PANTOTHENIC_ACID|CO_FACTOR_METABOLISM	PLANT_VITAMIN_B5|PANTOTHENIC_ACID|CO_FACTOR_BIOSYNTHESIS	PGPT0008735-ilvC-K00053	2	1	1	2
PGPT0008740	DIRECT_EFFECTS	PHYTOHORMONE|PLANT_SIGNAL_PRODUCTION	PLANT_VITAMIN_PRODUCTION	PLANT_VITAMIN_B5|PANTOTHENIC_ACID|CO_FACTOR_METABOLISM	PLANT_VITAMIN_B5|PANTOTHENIC_ACID|CO_FACTOR_BIOSYNTHESIS	PGPT0008740-panB-K00606	1	1	0	1
PGPT0008745	DIRECT_EFFECTS	PHYTOHORMONE|PLANT_SIGNAL_PRODUCTION	PLANT_VITAMIN_PRODUCTION	PLANT_VITAMIN_B5|PANTOTHENIC_ACID|CO_FACTOR_METABOLISM	PLANT_VITAMIN_B5|PANTOTHENIC_ACID|CO_FACTOR_BIOSYNTHESIS	PGPT0008745-panE|apbA-K00077	0	2	1	2
PGPT0008750	DIRECT_EFFECTS	PHYTOHORMONE|PLANT_SIGNAL_PRODUCTION	PLANT_VITAMIN_PRODUCTION	PLANT_VITAMIN_B5|PANTOTHENIC_ACID|CO_FACTOR_METABOLISM	PLANT_VITAMIN_B5|PANTOTHENIC_ACID|CO_FACTOR_BIOSYNTHESIS	PGPT0008750-panC-K01918	1	1	1	0
PGPT0008760	DIRECT_EFFECTS	PHYTOHORMONE|PLANT_SIGNAL_PRODUCTION	PLANT_VITAMIN_PRODUCTION	PLANT_VITAMIN_B5|PANTOTHENIC_ACID|CO_FACTOR_METABOLISM	PLANT_VITAMIN_B5|PANTOTHENIC_ACID|CO_FACTOR_BIOSYNTHESIS	PGPT0008760-thnR-K18568	1	0	0	0
PGPT0008770	DIRECT_EFFECTS	PHYTOHORMONE|PLANT_SIGNAL_PRODUCTION	PLANT_VITAMIN_PRODUCTION	PLANT_VITAMIN_B5|PANTOTHENIC_ACID|CO_FACTOR_METABOLISM	PLANT_VITAMIN_B5|PANTOTHENIC_ACID|CO_FACTOR_BIOSYNTHESIS	PGPT0008770-coaA-K00867	1	0	1	1
PGPT0008780	DIRECT_EFFECTS	PHYTOHORMONE|PLANT_SIGNAL_PRODUCTION	PLANT_VITAMIN_PRODUCTION	PLANT_VITAMIN_B5|PANTOTHENIC_ACID|CO_FACTOR_METABOLISM	PLANT_VITAMIN_B5|PANTOTHENIC_ACID|CO_FACTOR_BIOSYNTHESIS	PGPT0008780-coaX-K03525	1	1	0	0
PGPT0008815	DIRECT_EFFECTS	PHYTOHORMONE|PLANT_SIGNAL_PRODUCTION	PLANT_VITAMIN_PRODUCTION	PLANT_VITAMIN_B5|PANTOTHENIC_ACID|CO_FACTOR_METABOLISM	PLANT_VITAMIN_B5|PANTOTHENIC_ACID|CO_FACTOR_BIOSYNTHESIS	PGPT0008815-coaBC|dfp-K13038	1	1	1	2
PGPT0008820	DIRECT_EFFECTS	PHYTOHORMONE|PLANT_SIGNAL_PRODUCTION	PLANT_VITAMIN_PRODUCTION	PLANT_VITAMIN_B5|PANTOTHENIC_ACID|CO_FACTOR_METABOLISM	PLANT_VITAMIN_B5|PANTOTHENIC_ACID|CO_FACTOR_BIOSYNTHESIS# PGPT	PGPT0008820-mazG-K04765	0	0	2	2
PGPT0008825	DIRECT_EFFECTS	PHYTOHORMONE|PLANT_SIGNAL_PRODUCTION	PLANT_VITAMIN_PRODUCTION	PLANT_VITAMIN_B5|PANTOTHENIC_ACID|CO_FACTOR_METABOLISM	PLANT_VITAMIN_B5|PANTOTHENIC_ACID|CO_FACTOR_BIOSYNTHESIS	PGPT0008825-coaD|kdtB-K00954	1	1	1	1
PGPT0008835	DIRECT_EFFECTS	PHYTOHORMONE|PLANT_SIGNAL_PRODUCTION	PLANT_VITAMIN_PRODUCTION	PLANT_VITAMIN_B5|PANTOTHENIC_ACID|CO_FACTOR_METABOLISM	PLANT_VITAMIN_B5|PANTOTHENIC_ACID|CO_FACTOR_BIOSYNTHESIS	PGPT0008835-coaE-K00859	0	2	1	2
PGPT0008840	DIRECT_EFFECTS	PHYTOHORMONE|PLANT_SIGNAL_PRODUCTION	PLANT_VITAMIN_PRODUCTION	PLANT_VITAMIN_B5|PANTOTHENIC_ACID|CO_FACTOR_METABOLISM	PLANT_VITAMIN_B5|PANTOTHENIC_ACID|CO_FACTOR_BIOSYNTHESIS# PGPT	PGPT0008840-acpS-K00997	1	1	1	2
PGPT0008845	DIRECT_EFFECTS	PHYTOHORMONE|PLANT_SIGNAL_PRODUCTION	PLANT_VITAMIN_PRODUCTION	PLANT_VITAMIN_B5|PANTOTHENIC_ACID|CO_FACTOR_METABOLISM	PLANT_VITAMIN_B5|PANTOTHENIC_ACID|CO_FACTOR_BIOSYNTHESIS	PGPT0008845-LYS5|acpT-K06133	0	1	1	0
PGPT0008850	DIRECT_EFFECTS	PHYTOHORMONE|PLANT_SIGNAL_PRODUCTION	PLANT_VITAMIN_PRODUCTION	PLANT_VITAMIN_B5|PANTOTHENIC_ACID|CO_FACTOR_METABOLISM	PLANT_VITAMIN_B5|PANTOTHENIC_ACID|CO_FACTOR_BIOSYNTHESIS	PGPT0008850-acpH-K08682	0	0	0	1
PGPT0008860	DIRECT_EFFECTS	PHYTOHORMONE|PLANT_SIGNAL_PRODUCTION	PLANT_VITAMIN_PRODUCTION	PLANT_VITAMIN_B5|PANTOTHENIC_ACID|CO_FACTOR_METABOLISM	PLANT_VITAMIN_B5|PANTOTHENIC_ACID|CO_FACTOR_BIOSYNTHESIS# PGPT	PGPT0008860-ilvE-K00826	2	1	2	2
PGPT0008861	INDIRECT_EFFECTS	COLONIZING_PLANT_SYSTEM	COLONIZATION-PLANT_DERIVED_SUBSTRATE_USAGE	PLANT_DERIVED_CARBOHYDRATE_USAGE-OTHERS	PLANT_DERIVED_PROPIONATE|PROPANOATE_UTILIZATION# PGPT	PGPT0008861-bkdA1-K00166	2	1	1	0
PGPT0008862	INDIRECT_EFFECTS	COLONIZING_PLANT_SYSTEM	COLONIZATION-PLANT_DERIVED_SUBSTRATE_USAGE	PLANT_DERIVED_CARBOHYDRATE_USAGE-OTHERS	PLANT_DERIVED_PROPIONATE|PROPANOATE_UTILIZATION# PGPT	PGPT0008862-bkdA2|bfmBAB-K00167	3	1	1	0
PGPT0008880	DIRECT_EFFECTS	PHYTOHORMONE|PLANT_SIGNAL_PRODUCTION	PLANT_VITAMIN_PRODUCTION	PLANT_VITAMIN_B5|PANTOTHENIC_ACID|CO_FACTOR_METABOLISM	PLANT_VITAMIN_B5|PANTOTHENIC_ACID|CO_FACTOR_BIOSYNTHESIS# PGPT	PGPT0008880-dht|hydA-K01464	0	0	2	0
PGPT0008885	DIRECT_EFFECTS	PHYTOHORMONE|PLANT_SIGNAL_PRODUCTION	PLANT_VITAMIN_PRODUCTION	PLANT_VITAMIN_B5|PANTOTHENIC_ACID|CO_FACTOR_METABOLISM	PLANT_VITAMIN_B5|PANTOTHENIC_ACID|CO_FACTOR_BIOSYNTHESIS# PGPT	PGPT0008885-UPB1_like|pydC-K01431	0	0	2	1
PGPT0008890	DIRECT_EFFECTS	PHYTOHORMONE|PLANT_SIGNAL_PRODUCTION	PLANT_VITAMIN_PRODUCTION	PLANT_VITAMIN_B5|PANTOTHENIC_ACID|CO_FACTOR_METABOLISM	PLANT_VITAMIN_B5|PANTOTHENIC_ACID|CO_FACTOR_BIOSYNTHESIS# PGPT	PGPT0008890-panD-K01579	1	0	0	0
PGPT0008895	DIRECT_EFFECTS	PHYTOHORMONE|PLANT_SIGNAL_PRODUCTION	PLANT_VITAMIN_PRODUCTION	PLANT_VITAMIN_B5|PANTOTHENIC_ACID|CO_FACTOR_METABOLISM	PLANT_VITAMIN_B5|PANTOTHENIC_ACID|CO_FACTOR_BIOSYNTHESIS# PGPT	PGPT0008895-mfnA|adc-K18933	1	0	0	0
PGPT0008905	DIRECT_EFFECTS	PHYTOHORMONE|PLANT_SIGNAL_PRODUCTION	PLANT_VITAMIN_PRODUCTION	PLANT_VITAMIN_B1|THIAMIN_METABOLISM	PLANT_VITAMIN_B1|THIAMIN_BIOSYNTHESIS# PGPT	PGPT0008905-thiC-K03147	0	1	2	1
PGPT0008915	DIRECT_EFFECTS	PHYTOHORMONE|PLANT_SIGNAL_PRODUCTION	PLANT_VITAMIN_PRODUCTION	PLANT_VITAMIN_B1|THIAMIN_METABOLISM	PLANT_VITAMIN_B1|THIAMIN_BIOSYNTHESIS# PGPT	PGPT0008915-thiD-K00941	0	1	1	0
PGPT0008935	DIRECT_EFFECTS	PHYTOHORMONE|PLANT_SIGNAL_PRODUCTION	PLANT_VITAMIN_PRODUCTION	PLANT_VITAMIN_B1|THIAMIN_METABOLISM	PLANT_VITAMIN_B1|THIAMIN_BIOSYNTHESIS# PGPT	PGPT0008935-thiF-K03148	1	2	1	4
PGPT0008940	DIRECT_EFFECTS	PHYTOHORMONE|PLANT_SIGNAL_PRODUCTION	PLANT_VITAMIN_PRODUCTION	PLANT_VITAMIN_B1|THIAMIN_METABOLISM	PLANT_VITAMIN_B1|THIAMIN_BIOSYNTHESIS# PGPT	PGPT0008940-thiI-K03151	0	0	0	1
PGPT0008945	DIRECT_EFFECTS	PHYTOHORMONE|PLANT_SIGNAL_PRODUCTION	PLANT_VITAMIN_PRODUCTION	PLANT_VITAMIN_B1|THIAMIN_METABOLISM	PLANT_VITAMIN_B1|THIAMIN_BIOSYNTHESIS	PGPT0008945-thiJ-K03152	0	0	0	1
PGPT0008955	DIRECT_EFFECTS	PHYTOHORMONE|PLANT_SIGNAL_PRODUCTION	PLANT_VITAMIN_PRODUCTION	PLANT_VITAMIN_B1|THIAMIN_METABOLISM	PLANT_VITAMIN_B1|THIAMIN_BIOSYNTHESIS# PGPT	PGPT0008955-thiO-K03153	0	1	2	0
PGPT0008960	DIRECT_EFFECTS	PHYTOHORMONE|PLANT_SIGNAL_PRODUCTION	PLANT_SIGNAL-OTHER_TERPENOID|DERIVATE_PRODUCTION	PLANT_SIGNAL-TERPENOID_DERIVATE_METABOLISM	PLANT_SIGNAL-TERPENOID_BACKBONE_BIOSYNTHESIS# PGPT	PGPT0008960-dxs-K01662	1	1	1	2
PGPT0008965	DIRECT_EFFECTS	PHYTOHORMONE|PLANT_SIGNAL_PRODUCTION	PLANT_VITAMIN_PRODUCTION	PLANT_VITAMIN_B1|THIAMIN_METABOLISM	PLANT_VITAMIN_B1|THIAMIN_BIOSYNTHESIS# PGPT	PGPT0008965-thiG-K03149	0	1	1	1
PGPT0008970	DIRECT_EFFECTS	PHYTOHORMONE|PLANT_SIGNAL_PRODUCTION	PLANT_VITAMIN_PRODUCTION	PLANT_VITAMIN_B1|THIAMIN_METABOLISM	PLANT_VITAMIN_B1|THIAMIN_BIOSYNTHESIS# PGPT	PGPT0008970-thiS-K03154	0	1	1	1
PGPT0008985	DIRECT_EFFECTS	PHYTOHORMONE|PLANT_SIGNAL_PRODUCTION	PLANT_VITAMIN_PRODUCTION	PLANT_VITAMIN_B1|THIAMIN_METABOLISM	PLANT_VITAMIN_B1|THIAMIN_BIOSYNTHESIS# PGPT	PGPT0008985-thi4-K22699	1	0	1	0
PGPT0008990	DIRECT_EFFECTS	PHYTOHORMONE|PLANT_SIGNAL_PRODUCTION	PLANT_VITAMIN_PRODUCTION	PLANT_VITAMIN_B1|THIAMIN_METABOLISM	PLANT_VITAMIN_B1|THIAMIN_BIOSYNTHESIS# PGPT	PGPT0008990-thiM-K00878	0	0	1	0
PGPT0008995	DIRECT_EFFECTS	PHYTOHORMONE|PLANT_SIGNAL_PRODUCTION	PLANT_VITAMIN_PRODUCTION	PLANT_VITAMIN_B1|THIAMIN_METABOLISM	PLANT_VITAMIN_B1|THIAMIN_BIOSYNTHESIS# PGPT	PGPT0008995-thiE-K00788	0	1	2	1
PGPT0009010	DIRECT_EFFECTS	PHYTOHORMONE|PLANT_SIGNAL_PRODUCTION	PLANT_VITAMIN_PRODUCTION	PLANT_VITAMIN_B1|THIAMIN_METABOLISM	PLANT_VITAMIN_B1|THIAMIN_BIOSYNTHESIS# PGPT	PGPT0009010-thiL-K00946	1	2	1	3
PGPT0009020	DIRECT_EFFECTS	PHYTOHORMONE|PLANT_SIGNAL_PRODUCTION	PLANT_VITAMIN_PRODUCTION	PLANT_VITAMIN_B1|THIAMIN_METABOLISM	PLANT_VITAMIN_B1|THIAMIN_BIOSYNTHESIS# PGPT	PGPT0009020-rsgA|engC-K06949	1	1	0	2
PGPT0009040	DIRECT_EFFECTS	PHYTOHORMONE|PLANT_SIGNAL_PRODUCTION	PLANT_VITAMIN_PRODUCTION	PLANT_VITAMIN_B1|THIAMIN_METABOLISM	PLANT_VITAMIN_B1|THIAMIN_BIOSYNTHESIS# PGPT	PGPT0009040-adk|AK-K00939	1	1	1	1
PGPT0009060	DIRECT_EFFECTS	PHYTOHORMONE|PLANT_SIGNAL_PRODUCTION	PLANT_VITAMIN_PRODUCTION	PLANT_VITAMIN_B1|THIAMIN_METABOLISM	PLANT_VITAMIN_B1|THIAMIN_BIOSYNTHESIS# PGPT	PGPT0009060-ylmB-K20895	1	0	0	0
PGPT0009075	DIRECT_EFFECTS	PHYTOHORMONE|PLANT_SIGNAL_PRODUCTION	PLANT_VITAMIN_PRODUCTION	PLANT_VITAMIN_B1|THIAMIN_METABOLISM	PLANT_VITAMIN_B1|THIAMIN_TRANSPORT# PGPT	PGPT0009075-cytX-K03457	1	0	0	0
PGPT0009095	DIRECT_EFFECTS	PHYTOHORMONE|PLANT_SIGNAL_PRODUCTION	PLANT_VITAMIN_PRODUCTION	PLANT_VITAMIN_B1|THIAMIN_METABOLISM	PLANT_VITAMIN_B1|THIAMIN_TRANSPORT# PGPT	PGPT0009095-thiB|tbpA-K02064	1	0	0	0
PGPT0009100	DIRECT_EFFECTS	PHYTOHORMONE|PLANT_SIGNAL_PRODUCTION	PLANT_VITAMIN_PRODUCTION	PLANT_VITAMIN_B1|THIAMIN_METABOLISM	PLANT_VITAMIN_B1|THIAMIN_TRANSPORT# PGPT	PGPT0009100-thiT-K16789	0	0	0	1
PGPT0009105	DIRECT_EFFECTS	PHYTOHORMONE|PLANT_SIGNAL_PRODUCTION	PLANT_VITAMIN_PRODUCTION	PLANT_VITAMIN_B1|THIAMIN_METABOLISM	PLANT_VITAMIN_B1|THIAMIN_TRANSPORT# PGPT	PGPT0009105-thiP-K02063	1	0	0	2
PGPT0009110	DIRECT_EFFECTS	PHYTOHORMONE|PLANT_SIGNAL_PRODUCTION	PLANT_VITAMIN_PRODUCTION	PLANT_VITAMIN_B1|THIAMIN_METABOLISM	PLANT_VITAMIN_B1|THIAMIN_TRANSPORT# PGPT	PGPT0009110-thiQ-K02062	1	0	0	2
PGPT0009115	DIRECT_EFFECTS	PHYTOHORMONE|PLANT_SIGNAL_PRODUCTION	PLANT_VITAMIN_PRODUCTION	PLANT_VITAMIN_B6|PYRIDOXINE|PYRIDOXAL|PYRIDOXAMINE_METABOLISM	PLANT_VITAMIN_B6|PYRIDOXINE|PYRIDOXAL|PYRIDOXAMINE_BIOSYNTHESIS# PGPT	PGPT0009115-pdxH-K00275	1	1	1	0
PGPT0009125	DIRECT_EFFECTS	PHYTOHORMONE|PLANT_SIGNAL_PRODUCTION	PLANT_VITAMIN_PRODUCTION	PLANT_VITAMIN_B6|PYRIDOXINE|PYRIDOXAL|PYRIDOXAMINE_METABOLISM	PLANT_VITAMIN_B6|PYRIDOXINE|PYRIDOXAL|PYRIDOXAMINE_BIOSYNTHESIS# PGPT	PGPT0009125-pdxK|pdxY-K00868	1	2	1	4
PGPT0009140	DIRECT_EFFECTS	PHYTOHORMONE|PLANT_SIGNAL_PRODUCTION	PLANT_VITAMIN_PRODUCTION	PLANT_VITAMIN_B6|PYRIDOXINE|PYRIDOXAL|PYRIDOXAMINE_METABOLISM	PLANT_VITAMIN_B6|PYRIDOXINE|PYRIDOXAL|PYRIDOXAMINE_BIOSYNTHESIS# PGPT	PGPT0009140-ydbC-K05275	1	1	0	1
PGPT0009145	DIRECT_EFFECTS	PHYTOHORMONE|PLANT_SIGNAL_PRODUCTION	PLANT_VITAMIN_PRODUCTION	PLANT_VITAMIN_B6|PYRIDOXINE|PYRIDOXAL|PYRIDOXAMINE_METABOLISM	PLANT_VITAMIN_B6|PYRIDOXINE|PYRIDOXAL|PYRIDOXAMINE_BIOSYNTHESIS# PGPT	PGPT0009145-epd-K03472	0	0	0	2
PGPT0009150	DIRECT_EFFECTS	PHYTOHORMONE|PLANT_SIGNAL_PRODUCTION	PLANT_VITAMIN_PRODUCTION	PLANT_VITAMIN_B6|PYRIDOXINE|PYRIDOXAL|PYRIDOXAMINE_METABOLISM	PLANT_VITAMIN_B6|PYRIDOXINE|PYRIDOXAL|PYRIDOXAMINE_BIOSYNTHESIS# PGPT	PGPT0009150-pdxB-K03473	0	0	0	1
PGPT0009155	DIRECT_EFFECTS	PHYTOHORMONE|PLANT_SIGNAL_PRODUCTION	PLANT_VITAMIN_PRODUCTION	PLANT_VITAMIN_B6|PYRIDOXINE|PYRIDOXAL|PYRIDOXAMINE_METABOLISM	PLANT_VITAMIN_B6|PYRIDOXINE|PYRIDOXAL|PYRIDOXAMINE_BIOSYNTHESIS# PGPT	PGPT0009155-serA-K00058	2	4	5	3
PGPT0009160	DIRECT_EFFECTS	PHYTOHORMONE|PLANT_SIGNAL_PRODUCTION	PLANT_VITAMIN_PRODUCTION	PLANT_VITAMIN_B6|PYRIDOXINE|PYRIDOXAL|PYRIDOXAMINE_METABOLISM	PLANT_VITAMIN_B6|PYRIDOXINE|PYRIDOXAL|PYRIDOXAMINE_BIOSYNTHESIS# PGPT	PGPT0009160-serC|pdxF-K00831	1	1	1	2
PGPT0009165	DIRECT_EFFECTS	PHYTOHORMONE|PLANT_SIGNAL_PRODUCTION	PLANT_VITAMIN_PRODUCTION	PLANT_VITAMIN_B6|PYRIDOXINE|PYRIDOXAL|PYRIDOXAMINE_METABOLISM	PLANT_VITAMIN_B6|PYRIDOXINE|PYRIDOXAL|PYRIDOXAMINE_BIOSYNTHESIS# PGPT	PGPT0009165-pdxA-K00097	0	2	3	2
PGPT0009170	DIRECT_EFFECTS	PHYTOHORMONE|PLANT_SIGNAL_PRODUCTION	PLANT_VITAMIN_PRODUCTION	PLANT_VITAMIN_B6|PYRIDOXINE|PYRIDOXAL|PYRIDOXAMINE_METABOLISM	PLANT_VITAMIN_B6|PYRIDOXINE|PYRIDOXAL|PYRIDOXAMINE_BIOSYNTHESIS# PGPT	PGPT0009170-pdxJ-K03474	0	3	2	3
PGPT0009175	DIRECT_EFFECTS	PHYTOHORMONE|PLANT_SIGNAL_PRODUCTION	PLANT_VITAMIN_PRODUCTION	PLANT_VITAMIN_B6|PYRIDOXINE|PYRIDOXAL|PYRIDOXAMINE_METABOLISM	PLANT_VITAMIN_B6|PYRIDOXINE|PYRIDOXAL|PYRIDOXAMINE_BIOSYNTHESIS# PGPT	PGPT0009175-thrC-K01733	2	1	1	2
PGPT0009180	DIRECT_EFFECTS	PHYTOHORMONE|PLANT_SIGNAL_PRODUCTION	PLANT_VITAMIN_PRODUCTION	PLANT_VITAMIN_B6|PYRIDOXINE|PYRIDOXAL|PYRIDOXAMINE_METABOLISM	PLANT_VITAMIN_B6|PYRIDOXINE|PYRIDOXAL|PYRIDOXAMINE_BIOSYNTHESIS# PGPT	PGPT0009180-pdxS|pdx1|yaaD-K06215	1	0	0	0
PGPT0009185	DIRECT_EFFECTS	PHYTOHORMONE|PLANT_SIGNAL_PRODUCTION	PLANT_VITAMIN_PRODUCTION	PLANT_VITAMIN_B6|PYRIDOXINE|PYRIDOXAL|PYRIDOXAMINE_METABOLISM	PLANT_VITAMIN_B6|PYRIDOXINE|PYRIDOXAL|PYRIDOXAMINE_BIOSYNTHESIS# PGPT	PGPT0009185-pdxT|pdx2|yaaE-K08681	2	0	0	0
PGPT0009235	DIRECT_EFFECTS	PHYTOHORMONE|PLANT_SIGNAL_PRODUCTION	PLANT_VITAMIN_PRODUCTION	PLANT_VITAMIN_B12|COBALAMIN_METABOLISM	PLANT_VITAMIN_B12|COBALAMIN_BIOSYNTHESIS	PGPT0009235-cbiX-K03795	1	1	0	0
PGPT0009250	DIRECT_EFFECTS	PHYTOHORMONE|PLANT_SIGNAL_PRODUCTION	PLANT_VITAMIN_PRODUCTION	PLANT_VITAMIN_B12|COBALAMIN_METABOLISM	PLANT_VITAMIN_B12|COBALAMIN_BIOSYNTHESIS	PGPT0009250-cobG-K02229	0	0	1	0
PGPT0009265	DIRECT_EFFECTS	PHYTOHORMONE|PLANT_SIGNAL_PRODUCTION	PLANT_VITAMIN_PRODUCTION	PLANT_VITAMIN_B12|COBALAMIN_METABOLISM	PLANT_VITAMIN_B12|COBALAMIN_BIOSYNTHESIS	PGPT0009265-cobF-K02228	0	0	1	0
PGPT0009270	DIRECT_EFFECTS	PHYTOHORMONE|PLANT_SIGNAL_PRODUCTION	PLANT_VITAMIN_PRODUCTION	PLANT_VITAMIN_B12|COBALAMIN_METABOLISM	PLANT_VITAMIN_B12|COBALAMIN_BIOSYNTHESIS	PGPT0009270-cobL-K00595	0	0	1	0
PGPT0009280	DIRECT_EFFECTS	PHYTOHORMONE|PLANT_SIGNAL_PRODUCTION	PLANT_VITAMIN_PRODUCTION	PLANT_VITAMIN_B12|COBALAMIN_METABOLISM	PLANT_VITAMIN_B12|COBALAMIN_BIOSYNTHESIS	PGPT0009280-cobN-K02230	0	3	1	0
PGPT0009285	DIRECT_EFFECTS	PHYTOHORMONE|PLANT_SIGNAL_PRODUCTION	PLANT_VITAMIN_PRODUCTION	PLANT_VITAMIN_B12|COBALAMIN_METABOLISM	PLANT_VITAMIN_B12|COBALAMIN_BIOSYNTHESIS	PGPT0009285-cobS-K09882	0	0	1	0
PGPT0009290	DIRECT_EFFECTS	PHYTOHORMONE|PLANT_SIGNAL_PRODUCTION	PLANT_VITAMIN_PRODUCTION	PLANT_VITAMIN_B12|COBALAMIN_METABOLISM	PLANT_VITAMIN_B12|COBALAMIN_BIOSYNTHESIS	PGPT0009290-cobT-K09883	0	0	1	0
PGPT0009345	DIRECT_EFFECTS	PHYTOHORMONE|PLANT_SIGNAL_PRODUCTION	PLANT_VITAMIN_PRODUCTION	PLANT_VITAMIN_B12|COBALAMIN_METABOLISM	PLANT_VITAMIN_B12|COBALAMIN_TRANSPORT# PGPT	PGPT0009345-bacA|yddA-K02471	0	1	3	0
PGPT0009350	DIRECT_EFFECTS	PHYTOHORMONE|PLANT_SIGNAL_PRODUCTION	PLANT_VITAMIN_PRODUCTION	PLANT_VITAMIN_C|ASCORBIC_ACID_METABOLISM	PLANT_VITAMIN_C|ASCORBIC_ACID_BIOSYNTHESIS# PGPT	PGPT0009350-GULO_like-K00103	3	0	0	0
PGPT0009360	DIRECT_EFFECTS	PHYTOHORMONE|PLANT_SIGNAL_PRODUCTION	PLANT_VITAMIN_PRODUCTION	PLANT_VITAMIN_K_METABOLISM	PLANT_VITAMIN_K_BIOSYNTHESIS	PGPT0009360-menF-K02552	1	0	0	0
PGPT0009365	DIRECT_EFFECTS	PHYTOHORMONE|PLANT_SIGNAL_PRODUCTION	PLANT_VITAMIN_PRODUCTION	PLANT_VITAMIN_K_METABOLISM	PLANT_VITAMIN_K_BIOSYNTHESIS	PGPT0009365-menD-K02551	1	0	0	0
PGPT0009370	DIRECT_EFFECTS	PHYTOHORMONE|PLANT_SIGNAL_PRODUCTION	PLANT_VITAMIN_PRODUCTION	PLANT_VITAMIN_K_METABOLISM	PLANT_VITAMIN_K_BIOSYNTHESIS	PGPT0009370-menH-K08680	1	1	0	0
PGPT0009375	DIRECT_EFFECTS	PHYTOHORMONE|PLANT_SIGNAL_PRODUCTION	PLANT_VITAMIN_PRODUCTION	PLANT_VITAMIN_K_METABOLISM	PLANT_VITAMIN_K_BIOSYNTHESIS	PGPT0009375-menC-K02549	2	0	0	1
PGPT0009380	DIRECT_EFFECTS	PHYTOHORMONE|PLANT_SIGNAL_PRODUCTION	PLANT_VITAMIN_PRODUCTION	PLANT_VITAMIN_K_METABOLISM	PLANT_VITAMIN_K_BIOSYNTHESIS	PGPT0009380-menE-K01911	1	0	0	0
PGPT0009385	DIRECT_EFFECTS	PHYTOHORMONE|PLANT_SIGNAL_PRODUCTION	PLANT_VITAMIN_PRODUCTION	PLANT_VITAMIN_K_METABOLISM	PLANT_VITAMIN_K_BIOSYNTHESIS	PGPT0009385-menB-K01661	1	0	0	1
PGPT0009395	DIRECT_EFFECTS	PHYTOHORMONE|PLANT_SIGNAL_PRODUCTION	PLANT_VITAMIN_PRODUCTION	PLANT_VITAMIN_K_METABOLISM	PLANT_VITAMIN_K_BIOSYNTHESIS	PGPT0009395-menA-K02548	1	0	0	1
PGPT0009425	DIRECT_EFFECTS	PHYTOHORMONE|PLANT_SIGNAL_PRODUCTION	PLANT_VITAMIN_PRODUCTION	PLANT_VITAMIN_K_METABOLISM	PLANT_VITAMIN_K_BIOSYNTHESIS	PGPT0009425-add-K18286	1	0	0	0
PGPT0009435	DIRECT_EFFECTS	PHYTOHORMONE|PLANT_SIGNAL_PRODUCTION	PLANT_VITAMIN_PRODUCTION	PLANT_VITAMIN_K_METABOLISM	PLANT_VITAMIN_K_BIOSYNTHESIS	PGPT0009435-mqnB-K11783	0	1	0	1
PGPT0009445	DIRECT_EFFECTS	PHYTOHORMONE|PLANT_SIGNAL_PRODUCTION	PLANT_VITAMIN_PRODUCTION	PLANT_VITAMIN_K_METABOLISM	PLANT_VITAMIN_K_BIOSYNTHESIS	PGPT0009445-mqnC-K11784	0	1	0	0
PGPT0009455	DIRECT_EFFECTS	PHYTOHORMONE|PLANT_SIGNAL_PRODUCTION	PLANT_VITAMIN_PRODUCTION	PLANT_VITAMIN_K_METABOLISM	PLANT_VITAMIN_K_BIOSYNTHESIS	PGPT0009455-kefF|nqo|ywrO-K00355	0	1	1	0
PGPT0009460	DIRECT_EFFECTS	PHYTOHORMONE|PLANT_SIGNAL_PRODUCTION	PLANT_VITAMIN_PRODUCTION	PLANT_VITAMIN_K_METABOLISM	PLANT_VITAMIN_K_BIOSYNTHESIS	PGPT0009460-wrbA-K03809	1	2	2	1
PGPT0009465	DIRECT_EFFECTS	PHYTOHORMONE|PLANT_SIGNAL_PRODUCTION	PLANT_VITAMIN_PRODUCTION	PLANT_VITAMIN_K_METABOLISM	PLANT_VITAMIN_K_BIOSYNTHESIS	PGPT0009465-qorB-K19267	0	0	0	1
PGPT0009480	DIRECT_EFFECTS	PHYTOHORMONE|PLANT_SIGNAL_PRODUCTION	PLANT_VITAMIN_PRODUCTION	PLANT_VITAMIN_E_METABOLISM	PLANT_VITAMIN_E_BIOSYNTHESIS# PGPT	PGPT0009480-hppD-K00457	1	1	2	0
PGPT0009485	DIRECT_EFFECTS	PHYTOHORMONE|PLANT_SIGNAL_PRODUCTION	PLANT_VITAMIN_PRODUCTION	PLANT_VITAMIN_E_METABOLISM	PLANT_VITAMIN_E_BIOSYNTHESIS# PGPT	PGPT0009485-rebM|vte3|adpE|eryG-K18534	0	0	2	0
PGPT0009505	DIRECT_EFFECTS	PHYTOHORMONE|PLANT_SIGNAL_PRODUCTION	PLANT_SIGNAL-UBIQUINONE|COENZYME_Q_PRODUCTION	PLANT_SIGNAL-UBIQUINONE|COENZYME_Q_METABOLISM	PLANT_SIGNAL-UBIQUINONE|COENZYME_Q_BIOSYNTHESIS# PGPT	PGPT0009505-ybgC|fcbC1-K01075	0	1	0	0
PGPT0009515	DIRECT_EFFECTS	PHYTOHORMONE|PLANT_SIGNAL_PRODUCTION	PLANT_SIGNAL-UBIQUINONE|COENZYME_Q_PRODUCTION	PLANT_SIGNAL-UBIQUINONE|COENZYME_Q_METABOLISM	PLANT_SIGNAL-UBIQUINONE|COENZYME_Q_BIOSYNTHESIS# PGPT	PGPT0009515-ubiA-K03179	0	1	1	0
PGPT0009520	DIRECT_EFFECTS	PHYTOHORMONE|PLANT_SIGNAL_PRODUCTION	PLANT_SIGNAL-UBIQUINONE|COENZYME_Q_PRODUCTION	PLANT_SIGNAL-UBIQUINONE|COENZYME_Q_METABOLISM	PLANT_SIGNAL-UBIQUINONE|COENZYME_Q_BIOSYNTHESIS# PGPT	PGPT0009520-ubiB|aarF-K03688	0	1	2	0
PGPT0009525	DIRECT_EFFECTS	PHYTOHORMONE|PLANT_SIGNAL_PRODUCTION	PLANT_SIGNALLING_VOLATILES	PLANT_SIGNAL-P-HYDOXYBENZOIC_ACID_VOLATILE_METABOLISM	PLANT_SIGNAL-P-HYDOXYBENZOIC_ACID_VOLATILE_BIOSYNTHESIS# PGPT	PGPT0009525-ubiC-K03181	0	1	0	0
PGPT0009530	DIRECT_EFFECTS	PHYTOHORMONE|PLANT_SIGNAL_PRODUCTION	PLANT_SIGNAL-UBIQUINONE|COENZYME_Q_PRODUCTION	PLANT_SIGNAL-UBIQUINONE|COENZYME_Q_METABOLISM	PLANT_SIGNAL-UBIQUINONE|COENZYME_Q_BIOSYNTHESIS# PGPT	PGPT0009530-ubiD-K03182	0	1	0	1
PGPT0009535	DIRECT_EFFECTS	PHYTOHORMONE|PLANT_SIGNAL_PRODUCTION	PLANT_SIGNAL-UBIQUINONE|COENZYME_Q_PRODUCTION	PLANT_SIGNAL-UBIQUINONE|COENZYME_Q_METABOLISM	PLANT_SIGNAL-UBIQUINONE|COENZYME_Q_BIOSYNTHESIS# PGPT	PGPT0009535-ubiE-K03183	2	4	2	1
PGPT0009540	DIRECT_EFFECTS	PHYTOHORMONE|PLANT_SIGNAL_PRODUCTION	PLANT_SIGNAL-UBIQUINONE|COENZYME_Q_PRODUCTION	PLANT_SIGNAL-UBIQUINONE|COENZYME_Q_METABOLISM	PLANT_SIGNAL-UBIQUINONE|COENZYME_Q_BIOSYNTHESIS# PGPT	PGPT0009540-ubiF-K03184	0	0	0	2
PGPT0009541	DIRECT_EFFECTS	PHYTOHORMONE|PLANT_SIGNAL_PRODUCTION	PLANT_SIGNAL-UBIQUINONE|COENZYME_Q_PRODUCTION	PLANT_SIGNAL-UBIQUINONE|COENZYME_Q_METABOLISM	PLANT_SIGNAL-UBIQUINONE|COENZYME_Q_BIOSYNTHESIS# PGPT	PGPT0009541-COQ7_like-K06134	0	1	0	0
PGPT0009545	DIRECT_EFFECTS	PHYTOHORMONE|PLANT_SIGNAL_PRODUCTION	PLANT_SIGNAL-UBIQUINONE|COENZYME_Q_PRODUCTION	PLANT_SIGNAL-UBIQUINONE|COENZYME_Q_METABOLISM	PLANT_SIGNAL-UBIQUINONE|COENZYME_Q_BIOSYNTHESIS# PGPT	PGPT0009545-ubiG-K00568	1	1	3	4
PGPT0009550	DIRECT_EFFECTS	PHYTOHORMONE|PLANT_SIGNAL_PRODUCTION	PLANT_SIGNAL-UBIQUINONE|COENZYME_Q_PRODUCTION	PLANT_SIGNAL-UBIQUINONE|COENZYME_Q_METABOLISM	PLANT_SIGNAL-UBIQUINONE|COENZYME_Q_BIOSYNTHESIS# PGPT	PGPT0009550-ubiH-K03185	0	1	3	1
PGPT0009555	DIRECT_EFFECTS	PHYTOHORMONE|PLANT_SIGNAL_PRODUCTION	PLANT_SIGNAL-UBIQUINONE|COENZYME_Q_PRODUCTION	PLANT_SIGNAL-UBIQUINONE|COENZYME_Q_METABOLISM	PLANT_SIGNAL-UBIQUINONE|COENZYME_Q_BIOSYNTHESIS# PGPT	PGPT0009555-ubiI-K18800	0	1	0	0
PGPT0009560	DIRECT_EFFECTS	PHYTOHORMONE|PLANT_SIGNAL_PRODUCTION	PLANT_SIGNAL-UBIQUINONE|COENZYME_Q_PRODUCTION	PLANT_SIGNAL-UBIQUINONE|COENZYME_Q_METABOLISM	PLANT_SIGNAL-UBIQUINONE|COENZYME_Q_BIOSYNTHESIS# PGPT	PGPT0009560-ubiJ|yigP-K03690	0	1	0	0
PGPT0009565	DIRECT_EFFECTS	PHYTOHORMONE|PLANT_SIGNAL_PRODUCTION	PLANT_SIGNAL-UBIQUINONE|COENZYME_Q_PRODUCTION	PLANT_SIGNAL-UBIQUINONE|COENZYME_Q_METABOLISM	PLANT_SIGNAL-UBIQUINONE|COENZYME_Q_BIOSYNTHESIS# PGPT	PGPT0009565-ubiX|bsdB-K03186	0	1	0	3
PGPT0009570	DIRECT_EFFECTS	PHYTOHORMONE|PLANT_SIGNAL_PRODUCTION	PLANT_SIGNAL-LINOLENIC_ACID_PRODUCTION	PLANT_SIGNAL-LINOLENIC_ACID_METABOLISM	PLANT_SIGNAL-LINOLENIC_ACID_BIOSYNTHESIS# PGPT	PGPT0009570-pldA-K01058	0	1	0	1
PGPT0009575	DIRECT_EFFECTS	PHYTOHORMONE|PLANT_SIGNAL_PRODUCTION	PLANT_SIGNAL-LINOLENIC_ACID_PRODUCTION	PLANT_SIGNAL-LINOLENIC_ACID_METABOLISM	PLANT_SIGNAL-LINOLENIC_ACID_BIOSYNTHESIS	PGPT0009575-desB|desD|desA-K00508	1	0	0	0
PGPT0009685	INDIRECT_EFFECTS	STRESS_CONTROL|BIOCONTROL	NEUTRALIZING_BIOTIC_STRESS	BACTERICIDAL_COMPOUNDS|ANTIBIOTICS	BACTERICIDAL-VANCOMYCIN_METABOLISM	PGPT0009685-cepH|sgcC3|mdpC3|kedY3-K16431	0	1	0	0
PGPT0009710	INDIRECT_EFFECTS	STRESS_CONTROL|BIOCONTROL	NEUTRALIZING_BIOTIC_STRESS	BACTERICIDAL_COMPOUNDS|ANTIBIOTICS	BACTERICIDAL-CHLOROEREMOMYCIN_METABOLISM	PGPT0009710-cepF|oxyB-K16446	1	0	0	0
PGPT0009760	INDIRECT_EFFECTS	STRESS_CONTROL|BIOCONTROL	NEUTRALIZING_BIOTIC_STRESS	BACTERICIDAL_COMPOUNDS|ANTIBIOTICS	BACTERICIDAL-CARBAPENEM_METABOLISM# PGPT	PGPT0009760-ycgN-K09160	0	0	1	1
PGPT0009795	INDIRECT_EFFECTS	STRESS_CONTROL|BIOCONTROL	NEUTRALIZING_BIOTIC_STRESS	BACTERICIDAL_COMPOUNDS|ANTIBIOTICS	BACTERICIDAL-TOXOFLAVIN_METABOLISM# PGPT	PGPT0009795-toxF-K09936	0	1	0	0
PGPT0009810	INDIRECT_EFFECTS	STRESS_CONTROL|BIOCONTROL	NEUTRALIZING_BIOTIC_STRESS	BACTERICIDAL_COMPOUNDS|ANTIBIOTICS	BACTERICIDAL-TOXOFLAVIN_METABOLISM# PGPT	PGPT0009810-toxI|oprM|oprM|emhC|ttgC|cusC|adeK|smeF|mtrE|cmeC|gesC-K18139	0	6	0	0
PGPT0009811	INDIRECT_EFFECTS	COMPETITIVE_EXCLUSION|CE	CE-BACTERIAL_FITNESS	CE-BACTERIAL_FITNESS-RESISTANCE_TO_ANTIMICROBIAL|TOXIC_COMPOUNDS	CE-BACTERIAL_FITNESS-QUINOLINE_RESISTANCE	PGPT0009811-iorB-K07303	1	3	2	0
PGPT0009812	INDIRECT_EFFECTS	COMPETITIVE_EXCLUSION|CE	CE-BACTERIAL_FITNESS	CE-BACTERIAL_FITNESS-RESISTANCE_TO_ANTIMICROBIAL|TOXIC_COMPOUNDS	CE-BACTERIAL_FITNESS-QUINOLINE_RESISTANCE	PGPT0009812-iorA-K07302	0	2	1	0
PGPT0009980	INDIRECT_EFFECTS	STRESS_CONTROL|BIOCONTROL	NEUTRALIZING_BIOTIC_STRESS	BACTERICIDAL_COMPOUNDS|ANTIBIOTICS	BACTERICIDAL-GENTAMICIN_METABOLISM	PGPT0009980-genN-K20592	0	0	0	1
PGPT0010110	INDIRECT_EFFECTS	STRESS_CONTROL|BIOCONTROL	NEUTRALIZING_BIOTIC_STRESS	BACTERICIDAL_COMPOUNDS|ANTIBIOTICS	BACTERICIDAL-AMYCIN_DERIVATE_BIOSYNTHESIS	PGPT0010110-thnT|cmmT-K18572	0	0	2	0
PGPT0010260	INDIRECT_EFFECTS	STRESS_CONTROL|BIOCONTROL	NEUTRALIZING_BIOTIC_STRESS	BACTERICIDAL_COMPOUNDS|ANTIBIOTICS	BACTERICIDAL-TYPE_II_POLYKETIDE-ACTINORHODIN|MEDERMYCIN|DIHYDROKALAFUNGIN_METABOLISM	PGPT0010260-actVII-K05554	0	0	1	0
PGPT0010265	INDIRECT_EFFECTS	STRESS_CONTROL|BIOCONTROL	NEUTRALIZING_BIOTIC_STRESS	BACTERICIDAL_COMPOUNDS|ANTIBIOTICS	BACTERICIDAL-TYPE_II_POLYKETIDE-ACTINORHODIN|MEDERMYCIN|DIHYDROKALAFUNGIN_METABOLISM	PGPT0010265-actIV-K05555	0	1	0	0
PGPT0010335	INDIRECT_EFFECTS	STRESS_CONTROL|BIOCONTROL	NEUTRALIZING_BIOTIC_STRESS	BACTERICIDAL_COMPOUNDS|ANTIBIOTICS	BACTERICIDAL-TYPE_II_POLYKETIDE-OXY-|CHLOR-|TETRACYCLINE_METABOLISM	PGPT0010335-oxyQ-K14254	1	0	0	0
PGPT0010355	INDIRECT_EFFECTS	STRESS_CONTROL|BIOCONTROL	NEUTRALIZING_BIOTIC_STRESS	BACTERICIDAL_COMPOUNDS|ANTIBIOTICS	BACTERICIDAL-TYPE_II_POLYKETIDE-OXY-|CHLOR-|TETRACYCLINE_METABOLISM# PGPT	PGPT0010355-otrA|tetM|tetO-K18220	3	3	3	4
PGPT0010360	INDIRECT_EFFECTS	STRESS_CONTROL|BIOCONTROL	NEUTRALIZING_BIOTIC_STRESS	BACTERICIDAL_COMPOUNDS|ANTIBIOTICS	BACTERICIDAL-TYPE_II_POLYKETIDE-OXY-|CHLOR-|TETRACYCLINE_METABOLISM# PGPT	PGPT0010360-otrB|tcr-K19542	3	2	1	0
PGPT0010410	INDIRECT_EFFECTS	STRESS_CONTROL|BIOCONTROL	NEUTRALIZING_BIOTIC_STRESS	BACTERICIDAL_COMPOUNDS|ANTIBIOTICS	BACTERICIDAL-TYPE_II_POLYKETIDE-LANDOMYCIN_METABOLISM	PGPT0010410-lndZ4-K15932	0	0	1	0
PGPT0010811	INDIRECT_EFFECTS	STRESS_CONTROL|BIOCONTROL	NEUTRALIZING_BIOTIC_STRESS	BACTERICIDAL_COMPOUNDS|ANTIBIOTICS	BACTERICIDAL-METHYMYCIN|PIKROMYCIN_METABOLISM	PGPT0010811-pikD-NA	1	0	0	0
PGPT0010995	INDIRECT_EFFECTS	STRESS_CONTROL|BIOCONTROL	NEUTRALIZING_BIOTIC_STRESS	BACTERICIDAL_COMPOUNDS|ANTIBIOTICS	BACTERICIDAL-PENICILLIN_METABOLISM	PGPT0010995-cefD-K04127	0	0	1	0
PGPT0011020	INDIRECT_EFFECTS	STRESS_CONTROL|BIOCONTROL	NEUTRALIZING_BIOTIC_STRESS	BACTERICIDAL_COMPOUNDS|ANTIBIOTICS	BACTERICIDAL-CEPHALOPORIN_METABOLISM	PGPT0011020-cah-K01060	1	0	0	0
PGPT0011035	INDIRECT_EFFECTS	STRESS_CONTROL|BIOCONTROL	NEUTRALIZING_BIOTIC_STRESS	BACTERICIDAL_COMPOUNDS|ANTIBIOTICS	BACTERICIDAL-NOCARDICIN_A-D_METABOLISM	PGPT0011035-nocF|hmaS-K16421	1	0	0	0
PGPT0011050	INDIRECT_EFFECTS	STRESS_CONTROL|BIOCONTROL	NEUTRALIZING_BIOTIC_STRESS	BACTERICIDAL_COMPOUNDS|ANTIBIOTICS	BACTERICIDAL-NOCARDICIN_A-D_METABOLISM	PGPT0011050-nocN|hmo-K16422	0	1	0	0
PGPT0011060	INDIRECT_EFFECTS	STRESS_CONTROL|BIOCONTROL	NEUTRALIZING_BIOTIC_STRESS	BACTERICIDAL_COMPOUNDS|ANTIBIOTICS	BACTERICIDAL-STREPTOMYCIN|KANAMYCIN|AMIKACIN_METABOLISM# PGPT	PGPT0011060-phoP-K07660	0	1	1	0
PGPT0011065	INDIRECT_EFFECTS	STRESS_CONTROL|BIOCONTROL	NEUTRALIZING_BIOTIC_STRESS	BACTERICIDAL_COMPOUNDS|ANTIBIOTICS	BACTERICIDAL-STREPTOMYCIN|KANAMYCIN|AMIKACIN_METABOLISM# PGPT	PGPT0011065-phoQ-K07637	0	1	1	1
PGPT0011200	INDIRECT_EFFECTS	STRESS_CONTROL|BIOCONTROL	NEUTRALIZING_BIOTIC_STRESS	BACTERICIDAL_COMPOUNDS|ANTIBIOTICS	BACTERICIDAL-ANSAMITOCIN|RIFAMYCIN_METABOLISM# PGPT	PGPT0011200-tktA|tktB-K00615	1	1	1	7
PGPT0011300	INDIRECT_EFFECTS	STRESS_CONTROL|BIOCONTROL	NEUTRALIZING_BIOTIC_STRESS	BACTERICIDAL_COMPOUNDS|ANTIBIOTICS	BACTERICIDAL-ANTIBIOTIC_PHOSPHONATE_SUBSTANCES# PGPT	PGPT0011300-pepM|aepX-K01841	0	1	0	0
PGPT0011310	INDIRECT_EFFECTS	STRESS_CONTROL|BIOCONTROL	NEUTRALIZING_BIOTIC_STRESS	BACTERICIDAL_COMPOUNDS|ANTIBIOTICS	BACTERICIDAL-ANTIBIOTIC_PHOSPHONATE_SUBSTANCES# PGPT	PGPT0011310-bcpC|aepY-K09459	0	1	0	0
PGPT0011375	INDIRECT_EFFECTS	STRESS_CONTROL|BIOCONTROL	NEUTRALIZING_BIOTIC_STRESS	BACTERICIDAL_COMPOUNDS|ANTIBIOTICS	BACTERICIDAL-AURACHIN_METABOLISM# PGPT	PGPT0011375-acpP-K02078	1	2	2	1
PGPT0011520	INDIRECT_EFFECTS	STRESS_CONTROL|BIOCONTROL	NEUTRALIZING_BIOTIC_STRESS	BACTERICIDAL_COMPOUNDS|ANTIBIOTICS	BACTERICIDAL-CYCLOSERINE_METABOLISM	PGPT0011520-dcsE-K19726	0	1	2	0
PGPT0011535	INDIRECT_EFFECTS	STRESS_CONTROL|BIOCONTROL	NEUTRALIZING_BIOTIC_STRESS	BACTERICIDAL_COMPOUNDS|ANTIBIOTICS	BACTERICIDAL-CYCLOSERINE_METABOLISM	PGPT0011535-dcsG-K19727	1	0	0	0
PGPT0011625	INDIRECT_EFFECTS	STRESS_CONTROL|BIOCONTROL	NEUTRALIZING_BIOTIC_STRESS	BACTERICIDAL_COMPOUNDS|ANTIBIOTICS	BACTERICIDAL-SIDEROMYCINS|MICROCINS	PGPT0011625-yejA-K13893	0	1	2	0
PGPT0011630	INDIRECT_EFFECTS	STRESS_CONTROL|BIOCONTROL	NEUTRALIZING_BIOTIC_STRESS	BACTERICIDAL_COMPOUNDS|ANTIBIOTICS	BACTERICIDAL-SIDEROMYCINS|MICROCINS	PGPT0011630-yejB-K13894	0	1	1	1
PGPT0011635	INDIRECT_EFFECTS	STRESS_CONTROL|BIOCONTROL	NEUTRALIZING_BIOTIC_STRESS	BACTERICIDAL_COMPOUNDS|ANTIBIOTICS	BACTERICIDAL-SIDEROMYCINS|MICROCINS	PGPT0011635-yejE-K13895	0	1	1	1
PGPT0011640	INDIRECT_EFFECTS	STRESS_CONTROL|BIOCONTROL	NEUTRALIZING_BIOTIC_STRESS	BACTERICIDAL_COMPOUNDS|ANTIBIOTICS	BACTERICIDAL-SIDEROMYCINS|MICROCINS	PGPT0011640-yejF-K13896	0	1	1	0
PGPT0011650	INDIRECT_EFFECTS	STRESS_CONTROL|BIOCONTROL	NEUTRALIZING_BIOTIC_STRESS	BACTERICIDAL_COMPOUNDS|ANTIBIOTICS	BACTERICIDAL-BACTERIOCINS|COLICINS	PGPT0011650-sadC|dcrA-K03837	0	0	0	3
PGPT0011655	INDIRECT_EFFECTS	STRESS_CONTROL|BIOCONTROL	NEUTRALIZING_BIOTIC_STRESS	BACTERICIDAL_COMPOUNDS|ANTIBIOTICS	BACTERICIDAL-BACTERIOCINS|COLICINS	PGPT0011655-cvpA-K03558	0	1	1	1
PGPT0011685	INDIRECT_EFFECTS	STRESS_CONTROL|BIOCONTROL	NEUTRALIZING_BIOTIC_STRESS	BACTERICIDAL_COMPOUNDS|ANTIBIOTICS	BACTERICIDAL-BACTERIOCINS|LANTIBIOITC|NISIN# PGPT	PGPT0011685-rseP-K11749	1	2	1	1
PGPT0011950	INDIRECT_EFFECTS	STRESS_CONTROL|BIOCONTROL	NEUTRALIZING_BIOTIC_STRESS	FUNGICIDAL_COMPOUNDS|ANTIBIOTICS	FUNGICIDAL-ANSAMITOCIN_P-3_METABOLISM# PGPT	PGPT0011950-asm17-K16028	1	0	0	1
PGPT0012130	INDIRECT_EFFECTS	STRESS_CONTROL|BIOCONTROL	NEUTRALIZING_BIOTIC_STRESS	FUNGICIDAL_COMPOUNDS|ANTIBIOTICS	FUNGICIDAL-CHITINOLYTIC_ACTIVITIES# PGPT	PGPT0012130-chiA|chtA|chiI-K01183	0	0	0	3
PGPT0012140	INDIRECT_EFFECTS	STRESS_CONTROL|BIOCONTROL	NEUTRALIZING_BIOTIC_STRESS	FUNGICIDAL_COMPOUNDS|ANTIBIOTICS	FUNGICIDAL-CHITINOLYTIC_ACTIVITIES	PGPT0012140-putative_chitinase-K03791	0	0	0	1
PGPT0012150	INDIRECT_EFFECTS	STRESS_CONTROL|BIOCONTROL	NEUTRALIZING_BIOTIC_STRESS	FUNGICIDAL_COMPOUNDS|ANTIBIOTICS	FUNGICIDAL-CHITINOLYTIC_ACTIVITIES# PGPT	PGPT0012150-HEXA_B_like|exo|chb-K12373	1	0	0	1
PGPT0012156	INDIRECT_EFFECTS	STRESS_CONTROL|BIOCONTROL	NEUTRALIZING_BIOTIC_STRESS	FUNGICIDAL_COMPOUNDS|ANTIBIOTICS	FUNGICIDAL-CHITINOLYTIC_ACTIVITIES	PGPT0012156-chitin_deacetylase-NA	0	2	1	0
PGPT0012160	INDIRECT_EFFECTS	STRESS_CONTROL|BIOCONTROL	NEUTRALIZING_BIOTIC_STRESS	FUNGICIDAL_COMPOUNDS|ANTIBIOTICS	FUNGICIDAL-CHITINOLYTIC_ACTIVITIES	PGPT0012160-chbG-K03478	0	0	2	1
PGPT0012170	INDIRECT_EFFECTS	STRESS_CONTROL|BIOCONTROL	NEUTRALIZING_BIOTIC_STRESS	FUNGICIDAL_COMPOUNDS|ANTIBIOTICS	FUNGICIDAL-CHITINOLYTIC_ACTIVITIES# PGPT	PGPT0012170-bcsZ|wssD|yhjM-K20542	0	1	1	0
PGPT0012175	INDIRECT_EFFECTS	STRESS_CONTROL|BIOCONTROL	NEUTRALIZING_BIOTIC_STRESS	FUNGICIDAL_COMPOUNDS|ANTIBIOTICS	FUNGICIDAL-CHITINOLYTIC_ACTIVITIES# PGPT	PGPT0012175-nagZ-K01207	3	1	1	0
PGPT0012185	INDIRECT_EFFECTS	STRESS_CONTROL|BIOCONTROL	NEUTRALIZING_BIOTIC_STRESS	FUNGICIDAL_COMPOUNDS|ANTIBIOTICS	FUNGICIDAL-CHITINOLYTIC_ACTIVITIES# PGPT	PGPT0012185-cdxA-K21606	0	1	1	0
PGPT0012210	INDIRECT_EFFECTS	STRESS_CONTROL|BIOCONTROL	NEUTRALIZING_BIOTIC_STRESS	FUNGICIDAL_COMPOUNDS|ANTIBIOTICS	FUNGICIDAL-MOTILITY-MEDIATED_DEFENSE_SIGNALLING# PGPT	PGPT0012210-yajQ-K09767	1	1	0	1
PGPT0012215	INDIRECT_EFFECTS	STRESS_CONTROL|BIOCONTROL	NEUTRALIZING_BIOTIC_STRESS	FUNGICIDAL_COMPOUNDS|ANTIBIOTICS	FUNGICIDAL-MOTILITY-MEDIATED_DEFENSE_SIGNALLING	PGPT0012215-desC-K00507	0	1	0	0
PGPT0012220	INDIRECT_EFFECTS	STRESS_CONTROL|BIOCONTROL	NEUTRALIZING_BIOTIC_STRESS	FUNGICIDAL_COMPOUNDS|ANTIBIOTICS	FUNGICIDAL-MOTILITY-MEDIATED_DEFENSE_SIGNALLING	PGPT0012220-lysK-K04566	1	0	1	0
PGPT0012225	INDIRECT_EFFECTS	STRESS_CONTROL|BIOCONTROL	NEUTRALIZING_BIOTIC_STRESS	FUNGICIDAL_COMPOUNDS|ANTIBIOTICS	FUNGICIDAL-MOTILITY-MEDIATED_DEFENSE_SIGNALLING	PGPT0012225-lysS-K04567	2	3	4	4
PGPT0012235	INDIRECT_EFFECTS	STRESS_CONTROL|BIOCONTROL	NEUTRALIZING_BIOTIC_STRESS	FUNGICIDAL_COMPOUNDS|ANTIBIOTICS	FUNGICIDAL-MOTILITY-MEDIATED_DEFENSE_SIGNALLING# PGPT	PGPT0012235-adiA-K01584	0	1	0	0
PGPT0012270	INDIRECT_EFFECTS	STRESS_CONTROL|BIOCONTROL	NEUTRALIZING_BIOTIC_STRESS	FUNGICIDAL_COMPOUNDS|ANTIBIOTICS	FUNGICIDAL-PUROMYCIN_METABOLISM	PGPT0012270-pur3-K12634	1	0	0	0
PGPT0012750	INDIRECT_EFFECTS	STRESS_CONTROL|BIOCONTROL	NEUTRALIZING_BIOTIC_STRESS	OTHER_BIOTIC_STRESS_RESISTANCE_GENES	BIOTIC_STRESS_RESISTANCE-BACILYSIN_METABOLISM# PGPT	PGPT0012750-degU-K07692	4	1	0	0
PGPT0012760	INDIRECT_EFFECTS	STRESS_CONTROL|BIOCONTROL	NEUTRALIZING_BIOTIC_STRESS	OTHER_BIOTIC_STRESS_RESISTANCE_GENES	BIOTIC_STRESS_RESISTANCE-BACILYSIN_METABOLISM	PGPT0012760-bacF-K19549	0	1	1	0
PGPT0012800	INDIRECT_EFFECTS	STRESS_CONTROL|BIOCONTROL	NEUTRALIZING_BIOTIC_STRESS	BIOTIC_STRESS_RESISTANCE-PHENAZINE_DERIVATES	BIOTIC_STRESS_RESISTANCE-PHENAZINE_BIOSYNTHESIS# PGPT	PGPT0012800-phzE-K13063	1	0	0	0
PGPT0012805	INDIRECT_EFFECTS	STRESS_CONTROL|BIOCONTROL	NEUTRALIZING_BIOTIC_STRESS	BIOTIC_STRESS_RESISTANCE-PHENAZINE_DERIVATES	BIOTIC_STRESS_RESISTANCE-PHENAZINE_BIOSYNTHESIS# PGPT	PGPT0012805-phzF|yddE-K06998	0	1	4	0
PGPT0012840	INDIRECT_EFFECTS	STRESS_CONTROL|BIOCONTROL	NEUTRALIZING_BIOTIC_STRESS	BIOTIC_STRESS_RESISTANCE-PHENAZINE_DERIVATES	BIOTIC_STRESS_RESISTANCE-PHENAZINE_BIOSYNTHESIS# PGPT	PGPT0012840-pqsE-K20257	1	0	0	0
PGPT0012850	INDIRECT_EFFECTS	STRESS_CONTROL|BIOCONTROL	NEUTRALIZING_BIOTIC_STRESS	BIOTIC_STRESS_RESISTANCE-PHENAZINE_DERIVATES	BIOTIC_STRESS_RESISTANCE-PHENAZINE_BIOSYNTHESIS# PGPT	PGPT0012850-yddE-K00800	1	2	1	1
PGPT0012860	INDIRECT_EFFECTS	STRESS_CONTROL|BIOCONTROL	NEUTRALIZING_BIOTIC_STRESS	BIOTIC_STRESS_RESISTANCE-PHENAZINE_DERIVATES	BIOTIC_STRESS_RESISTANCE-HYDROXYPHENAZINE|PYOCYANIN_BIOSYNTHESIS# PGPT	PGPT0012860-phzS-K20940	0	1	1	0
PGPT0012865	INDIRECT_EFFECTS	STRESS_CONTROL|BIOCONTROL	NEUTRALIZING_BIOTIC_STRESS	BIOTIC_STRESS_RESISTANCE-PHENAZINE_DERIVATES	BIOTIC_STRESS_RESISTANCE-PHENAZINE-1-CARBOXYLIC_ACID_BIOSYNTHESIS	PGPT0012865-aroA-K01735	1	1	0	1
PGPT0012870	INDIRECT_EFFECTS	STRESS_CONTROL|BIOCONTROL	NEUTRALIZING_BIOTIC_STRESS	BIOTIC_STRESS_RESISTANCE-PHENAZINE_DERIVATES	BIOTIC_STRESS_RESISTANCE-PHENAZINE-1-CARBOXYLIC_ACID_BIOSYNTHESIS# PGPT	PGPT0012870-cyclohexadieny|prephenate_dehydrogenase|3_phosphoshikimate_1_carboxyvinyltransferase-K24018	1	0	1	0
PGPT0012875	INDIRECT_EFFECTS	STRESS_CONTROL|BIOCONTROL	NEUTRALIZING_BIOTIC_STRESS	BIOTIC_STRESS_RESISTANCE-PHENAZINE_DERIVATES	BIOTIC_STRESS_RESISTANCE-PHENAZINE-1-CARBOXYLIC_ACID_BIOSYNTHESIS# PGPT	PGPT0012875-aroB-K01736	1	1	1	2
PGPT0012880	INDIRECT_EFFECTS	STRESS_CONTROL|BIOCONTROL	NEUTRALIZING_BIOTIC_STRESS	BIOTIC_STRESS_RESISTANCE-PHENAZINE_DERIVATES	BIOTIC_STRESS_RESISTANCE-PHENAZINE-1-CARBOXYLIC_ACID_BIOSYNTHESIS# PGPT	PGPT0012880-aroKB-K13829	0	0	1	0
PGPT0012890	INDIRECT_EFFECTS	STRESS_CONTROL|BIOCONTROL	NEUTRALIZING_BIOTIC_STRESS	BIOTIC_STRESS_RESISTANCE-PHENAZINE_DERIVATES	BIOTIC_STRESS_RESISTANCE-PHENAZINE-1-CARBOXYLIC_ACID_BIOSYNTHESIS	PGPT0012890-aroE-K00014	1	1	2	0
PGPT0012900	INDIRECT_EFFECTS	STRESS_CONTROL|BIOCONTROL	NEUTRALIZING_BIOTIC_STRESS	BIOTIC_STRESS_RESISTANCE-PHENAZINE_DERIVATES	BIOTIC_STRESS_RESISTANCE-PHENAZINE-1-CARBOXYLIC_ACID_BIOSYNTHESIS# PGPT	PGPT0012900-aroL|aroK-K00891	1	2	1	1
PGPT0012905	INDIRECT_EFFECTS	STRESS_CONTROL|BIOCONTROL	NEUTRALIZING_BIOTIC_STRESS	BIOTIC_STRESS_RESISTANCE-PHENAZINE_DERIVATES	BIOTIC_STRESS_RESISTANCE-PHENAZINE-1-CARBOXYLIC_ACID_BIOSYNTHESIS# PGPT	PGPT0012905-aroQ|qutE-K03786	1	2	2	0
PGPT0012910	INDIRECT_EFFECTS	STRESS_CONTROL|BIOCONTROL	NEUTRALIZING_BIOTIC_STRESS	BIOTIC_STRESS_RESISTANCE-PHENAZINE_DERIVATES	BIOTIC_STRESS_RESISTANCE-PHENAZINE-1-CARBOXYLIC_ACID_BIOSYNTHESIS	PGPT0012910-aroF-K03856	1	1	1	1
PGPT0012920	INDIRECT_EFFECTS	STRESS_CONTROL|BIOCONTROL	NEUTRALIZING_BIOTIC_STRESS	BIOTIC_STRESS_RESISTANCE-PHENAZINE_DERIVATES	BIOTIC_STRESS_RESISTANCE-PHENAZINE-1-CARBOXYLIC_ACID_BIOSYNTHESIS	PGPT0012920-3_deoxy_7_phosphoheptulonate_synthase|aroF|aroG|aroH-K01626	1	2	1	4
PGPT0012925	INDIRECT_EFFECTS	STRESS_CONTROL|BIOCONTROL	NEUTRALIZING_BIOTIC_STRESS	BIOTIC_STRESS_RESISTANCE-PHYTOTOXIN_DEGRADATION	BIOTIC_STRESS_RESISTANCE-TABTOXIN_NEUTRALIZATION# PGPT	PGPT0012925-ttr-K19113	0	0	1	0
PGPT0012930	INDIRECT_EFFECTS	STRESS_CONTROL|BIOCONTROL	NEUTRALIZING_ABIOTIC_STRESS	NITROSATIVE|OXIDATIVE_STRESS|ROS_SCAVENGING	NITROSATIVE|OXIDATIVE_STRESS|ROS_REGULATORY_PROTEINS# PGPT	PGPT0012930-gacS|barA|varS-K07678	0	0	0	1
PGPT0012935	INDIRECT_EFFECTS	STRESS_CONTROL|BIOCONTROL	NEUTRALIZING_ABIOTIC_STRESS	NITROSATIVE|OXIDATIVE_STRESS|ROS_SCAVENGING	NITROSATIVE|OXIDATIVE_STRESS|ROS_REGULATORY_PROTEINS# PGPT	PGPT0012935-gacA|uvrY|varA-K07689	0	2	0	0
PGPT0012950	INDIRECT_EFFECTS	STRESS_CONTROL|BIOCONTROL	NEUTRALIZING_ABIOTIC_STRESS	NITROSATIVE|OXIDATIVE_STRESS|ROS_SCAVENGING	NITROSATIVE|OXIDATIVE_STRESS|ROS_REGULATORY_PROTEINS	PGPT0012950-ytfE|scdA-K07322	0	0	0	1
PGPT0012955	INDIRECT_EFFECTS	STRESS_CONTROL|BIOCONTROL	NEUTRALIZING_ABIOTIC_STRESS	NITROSATIVE|OXIDATIVE_STRESS|ROS_SCAVENGING	NITROSATIVE|OXIDATIVE_STRESS|ROS_REGULATORY_PROTEINS	PGPT0012955-soxR-K13639	1	0	2	1
PGPT0012960	INDIRECT_EFFECTS	STRESS_CONTROL|BIOCONTROL	NEUTRALIZING_ABIOTIC_STRESS	NITROSATIVE|OXIDATIVE_STRESS|ROS_SCAVENGING	NITROSATIVE|OXIDATIVE_STRESS|ROS_REGULATORY_PROTEINS	PGPT0012960-soxS-K13631	0	1	1	2
PGPT0012965	INDIRECT_EFFECTS	STRESS_CONTROL|BIOCONTROL	NEUTRALIZING_ABIOTIC_STRESS	NITROSATIVE|OXIDATIVE_STRESS|ROS_SCAVENGING	NITROSATIVE|OXIDATIVE_STRESS|ROS_REGULATORY_PROTEINS# PGPT	PGPT0012965-oxyR-K04761	1	7	5	3
PGPT0012975	INDIRECT_EFFECTS	STRESS_CONTROL|BIOCONTROL	NEUTRALIZING_ABIOTIC_STRESS	NITROSATIVE|OXIDATIVE_STRESS|ROS_SCAVENGING	NITROSATIVE|OXIDATIVE_STRESS|ROS_REGULATORY_PROTEINS# PGPT	PGPT0012975-envZ-K07638	0	3	1	2
PGPT0012980	INDIRECT_EFFECTS	STRESS_CONTROL|BIOCONTROL	NEUTRALIZING_ABIOTIC_STRESS	NITROSATIVE|OXIDATIVE_STRESS|ROS_SCAVENGING	NITROSATIVE|OXIDATIVE_STRESS|ROS_REGULATORY_PROTEINS	PGPT0012980-yggE-K09807	0	0	1	2
PGPT0012985	INDIRECT_EFFECTS	STRESS_CONTROL|BIOCONTROL	NEUTRALIZING_ABIOTIC_STRESS	NITROSATIVE|OXIDATIVE_STRESS|ROS_SCAVENGING	NITROSATIVE|OXIDATIVE_STRESS|ROS_REGULATORY_PROTEINS# PGPT	PGPT0012985-ompR-K07659	0	5	1	2
PGPT0012990	INDIRECT_EFFECTS	STRESS_CONTROL|BIOCONTROL	NEUTRALIZING_ABIOTIC_STRESS	NITROSATIVE|OXIDATIVE_STRESS|ROS_SCAVENGING	NITROSATIVE|OXIDATIVE_STRESS|ROS_REGULATORY_PROTEINS# PGPT	PGPT0012990-ompC-K09475	0	0	0	2
PGPT0012995	INDIRECT_EFFECTS	STRESS_CONTROL|BIOCONTROL	NEUTRALIZING_ABIOTIC_STRESS	NITROSATIVE|OXIDATIVE_STRESS|ROS_SCAVENGING	NITROSATIVE|OXIDATIVE_STRESS|ROS_REGULATORY_PROTEINS# PGPT	PGPT0012995-ompF-K09476	0	0	0	1
PGPT0013000							0	1	0	1
PGPT0013005	INDIRECT_EFFECTS	STRESS_CONTROL|BIOCONTROL	NEUTRALIZING_ABIOTIC_STRESS	NITROSATIVE|OXIDATIVE_STRESS|ROS_SCAVENGING	NITRIC_OXIDE_REDUCTION	PGPT0013005-nsrR|yjeB-K13771	1	1	0	1
PGPT0013010	INDIRECT_EFFECTS	STRESS_CONTROL|BIOCONTROL	NEUTRALIZING_ABIOTIC_STRESS	NITROSATIVE|OXIDATIVE_STRESS|ROS_SCAVENGING	DETOXIFICATION_OF_PEROXIDIZED_COMPOUNDS# PGPT	PGPT0013010-grxA-K03674	0	0	0	1
PGPT0013015	INDIRECT_EFFECTS	STRESS_CONTROL|BIOCONTROL	NEUTRALIZING_ABIOTIC_STRESS	NITROSATIVE|OXIDATIVE_STRESS|ROS_SCAVENGING	OXIDATIVE_STRESS-GLUTATHION_METABOLISM	PGPT0013015-gsiA-K13892	0	1	0	1
PGPT0013020	INDIRECT_EFFECTS	STRESS_CONTROL|BIOCONTROL	NEUTRALIZING_ABIOTIC_STRESS	NITROSATIVE|OXIDATIVE_STRESS|ROS_SCAVENGING	OXIDATIVE_STRESS-GLUTATHION_METABOLISM	PGPT0013020-gsiB-K13889	0	1	0	1
PGPT0013025	INDIRECT_EFFECTS	STRESS_CONTROL|BIOCONTROL	NEUTRALIZING_ABIOTIC_STRESS	NITROSATIVE|OXIDATIVE_STRESS|ROS_SCAVENGING	OXIDATIVE_STRESS-GLUTATHION_METABOLISM	PGPT0013025-gsiC-K13890	0	1	1	1
PGPT0013030	INDIRECT_EFFECTS	STRESS_CONTROL|BIOCONTROL	NEUTRALIZING_ABIOTIC_STRESS	NITROSATIVE|OXIDATIVE_STRESS|ROS_SCAVENGING	OXIDATIVE_STRESS-GLUTATHION_METABOLISM	PGPT0013030-gsiD-K13891	0	1	1	1
PGPT0013035	INDIRECT_EFFECTS	STRESS_CONTROL|BIOCONTROL	NEUTRALIZING_ABIOTIC_STRESS	NITROSATIVE|OXIDATIVE_STRESS|ROS_SCAVENGING	OXIDATIVE_STRESS-GLUTATHION_METABOLISM	PGPT0013035-gshA|ybdK-K01919	0	3	1	2
PGPT0013040	INDIRECT_EFFECTS	STRESS_CONTROL|BIOCONTROL	NEUTRALIZING_ABIOTIC_STRESS	NITROSATIVE|OXIDATIVE_STRESS|ROS_SCAVENGING	OXIDATIVE_STRESS-GLUTATHION_METABOLISM	PGPT0013040-gshB-K01920	1	1	1	1
PGPT0013045	INDIRECT_EFFECTS	STRESS_CONTROL|BIOCONTROL	NEUTRALIZING_ABIOTIC_STRESS	NITROSATIVE|OXIDATIVE_STRESS|ROS_SCAVENGING	OXIDATIVE_STRESS-GLUTATHION_METABOLISM	PGPT0013045-yghU|yfcG-K11209	0	2	2	0
PGPT0013050	INDIRECT_EFFECTS	STRESS_CONTROL|BIOCONTROL	NEUTRALIZING_ABIOTIC_STRESS	NITROSATIVE|OXIDATIVE_STRESS|ROS_SCAVENGING	OXIDATIVE_STRESS-GLUTATHION_METABOLISM	PGPT0013050-yqjG-K07393	1	0	0	1
PGPT0013055	INDIRECT_EFFECTS	STRESS_CONTROL|BIOCONTROL	NEUTRALIZING_ABIOTIC_STRESS	NITROSATIVE|OXIDATIVE_STRESS|ROS_SCAVENGING	OXIDATIVE_STRESS-THIOREDOXINES|THIOESTERASES	PGPT0013055-trxA-K03671	4	7	4	4
PGPT0013060	INDIRECT_EFFECTS	STRESS_CONTROL|BIOCONTROL	NEUTRALIZING_ABIOTIC_STRESS	NITROSATIVE|OXIDATIVE_STRESS|ROS_SCAVENGING	OXIDATIVE_STRESS-THIOREDOXINES|THIOESTERASES	PGPT0013060-trxB-K00384	4	5	2	2
PGPT0013061	INDIRECT_EFFECTS	STRESS_CONTROL|BIOCONTROL	NEUTRALIZING_ABIOTIC_STRESS	NITROSATIVE|OXIDATIVE_STRESS|ROS_SCAVENGING	OXIDATIVE_STRESS-THIOREDOXINES|THIOESTERASES	PGPT0013061-trxC-K03672	0	0	0	1
PGPT0013065	INDIRECT_EFFECTS	STRESS_CONTROL|BIOCONTROL	NEUTRALIZING_ABIOTIC_STRESS	NITROSATIVE|OXIDATIVE_STRESS|ROS_SCAVENGING	OXIDATIVE_STRESS-SULFOXIDE_REDUCTASES	PGPT0013065-msrA-K07304	1	3	0	1
PGPT0013070	INDIRECT_EFFECTS	STRESS_CONTROL|BIOCONTROL	NEUTRALIZING_ABIOTIC_STRESS	NITROSATIVE|OXIDATIVE_STRESS|ROS_SCAVENGING	OXIDATIVE_STRESS-SULFOXIDE_REDUCTASES	PGPT0013070-msrB-K07305	1	2	1	1
PGPT0013075	INDIRECT_EFFECTS	STRESS_CONTROL|BIOCONTROL	NEUTRALIZING_ABIOTIC_STRESS	NITROSATIVE|OXIDATIVE_STRESS|ROS_SCAVENGING	OXIDATIVE_STRESS-SULFOXIDE_REDUCTASES	PGPT0013075-msrP|yedY-K07147	1	1	1	0
PGPT0013080	INDIRECT_EFFECTS	STRESS_CONTROL|BIOCONTROL	NEUTRALIZING_ABIOTIC_STRESS	NITROSATIVE|OXIDATIVE_STRESS|ROS_SCAVENGING	DETOXIFICATION_OF_PEROXIDIZED_COMPOUNDS	PGPT0013080-glutaredoxin_dependent_peroxiredoxin-K24129	0	1	0	0
PGPT0013090	INDIRECT_EFFECTS	STRESS_CONTROL|BIOCONTROL	NEUTRALIZING_ABIOTIC_STRESS	NITROSATIVE|OXIDATIVE_STRESS|ROS_SCAVENGING	DETOXIFICATION_OF_PEROXIDIZED_COMPOUNDS	PGPT0013090-yfeX-K07223	1	0	0	1
PGPT0013095	INDIRECT_EFFECTS	STRESS_CONTROL|BIOCONTROL	NEUTRALIZING_ABIOTIC_STRESS	NITROSATIVE|OXIDATIVE_STRESS|ROS_SCAVENGING	DETOXIFICATION_OF_PEROXIDIZED_COMPOUNDS	PGPT0013095-pgdX-K24136	0	1	0	0
PGPT0013100	INDIRECT_EFFECTS	STRESS_CONTROL|BIOCONTROL	NEUTRALIZING_ABIOTIC_STRESS	NITROSATIVE|OXIDATIVE_STRESS|ROS_SCAVENGING	DETOXIFICATION_OF_PEROXIDIZED_COMPOUNDS	PGPT0013100-prx3-K24138	0	1	1	0
PGPT0013105	INDIRECT_EFFECTS	STRESS_CONTROL|BIOCONTROL	NEUTRALIZING_ABIOTIC_STRESS	NITROSATIVE|OXIDATIVE_STRESS|ROS_SCAVENGING	DETOXIFICATION_OF_PEROXIDIZED_COMPOUNDS	PGPT0013105-tpx-K11065	0	1	0	0
PGPT0013115	INDIRECT_EFFECTS	STRESS_CONTROL|BIOCONTROL	NEUTRALIZING_ABIOTIC_STRESS	NITROSATIVE|OXIDATIVE_STRESS|ROS_SCAVENGING	DETOXIFICATION_OF_PEROXIDIZED_COMPOUNDS	PGPT0013115-bsaA|gpx|btuE-K00432	1	2	1	0
PGPT0013120	INDIRECT_EFFECTS	STRESS_CONTROL|BIOCONTROL	NEUTRALIZING_ABIOTIC_STRESS	NITROSATIVE|OXIDATIVE_STRESS|ROS_SCAVENGING	DETOXIFICATION_OF_PEROXIDIZED_COMPOUNDS	PGPT0013120-bcp|PRXQ|DOT5-K03564	2	1	2	1
PGPT0013125	INDIRECT_EFFECTS	STRESS_CONTROL|BIOCONTROL	NEUTRALIZING_ABIOTIC_STRESS	NITROSATIVE|OXIDATIVE_STRESS|ROS_SCAVENGING	DETOXIFICATION_OF_PEROXIDIZED_COMPOUNDS	PGPT0013125-cpo-K00433	1	1	1	1
PGPT0013130	INDIRECT_EFFECTS	STRESS_CONTROL|BIOCONTROL	NEUTRALIZING_ABIOTIC_STRESS	NITROSATIVE|OXIDATIVE_STRESS|ROS_SCAVENGING	DETOXIFICATION_OF_PEROXIDIZED_COMPOUNDS	PGPT0013130-tsaA|PRDX2_4|ahpC-K03386	0	0	0	1
PGPT0013135	INDIRECT_EFFECTS	STRESS_CONTROL|BIOCONTROL	NEUTRALIZING_ABIOTIC_STRESS	NITROSATIVE|OXIDATIVE_STRESS|ROS_SCAVENGING	DETOXIFICATION_OF_PEROXIDIZED_COMPOUNDS	PGPT0013135-ahpC-K24126	0	1	0	0
PGPT0013140	INDIRECT_EFFECTS	STRESS_CONTROL|BIOCONTROL	NEUTRALIZING_ABIOTIC_STRESS	NITROSATIVE|OXIDATIVE_STRESS|ROS_SCAVENGING	DETOXIFICATION_OF_PEROXIDIZED_COMPOUNDS	PGPT0013140-ahpD-K04756	0	1	0	0
PGPT0013145	INDIRECT_EFFECTS	STRESS_CONTROL|BIOCONTROL	NEUTRALIZING_ABIOTIC_STRESS	NITROSATIVE|OXIDATIVE_STRESS|ROS_SCAVENGING	DETOXIFICATION_OF_PEROXIDIZED_COMPOUNDS	PGPT0013145-ahpE-K24120	1	0	0	0
PGPT0013150	INDIRECT_EFFECTS	STRESS_CONTROL|BIOCONTROL	NEUTRALIZING_ABIOTIC_STRESS	NITROSATIVE|OXIDATIVE_STRESS|ROS_SCAVENGING	DETOXIFICATION_OF_PEROXIDIZED_COMPOUNDS	PGPT0013150-ahpF-K03387	0	0	0	2
PGPT0013155	INDIRECT_EFFECTS	STRESS_CONTROL|BIOCONTROL	NEUTRALIZING_ABIOTIC_STRESS	NITROSATIVE|OXIDATIVE_STRESS|ROS_SCAVENGING	DETOXIFICATION_OF_PEROXIDIZED_COMPOUNDS	PGPT0013155-ohrR-K23775	3	3	5	1
PGPT0013160	INDIRECT_EFFECTS	STRESS_CONTROL|BIOCONTROL	NEUTRALIZING_ABIOTIC_STRESS	NITROSATIVE|OXIDATIVE_STRESS|ROS_SCAVENGING	DETOXIFICATION_OF_PEROXIDIZED_COMPOUNDS	PGPT0013160-ohrB|osmC|ohr|ykzA-K04063	1	1	1	0
PGPT0013165	INDIRECT_EFFECTS	STRESS_CONTROL|BIOCONTROL	NEUTRALIZING_ABIOTIC_STRESS	NITROSATIVE|OXIDATIVE_STRESS|ROS_SCAVENGING	DETOXIFICATION_OF_PEROXIDIZED_COMPOUNDS# PGPT	PGPT0013165-katG-K03782	2	1	0	2
PGPT0013170	INDIRECT_EFFECTS	STRESS_CONTROL|BIOCONTROL	NEUTRALIZING_ABIOTIC_STRESS	NITROSATIVE|OXIDATIVE_STRESS|ROS_SCAVENGING	DETOXIFICATION_OF_PEROXIDIZED_COMPOUNDS	PGPT0013170-gst-K00799	0	10	14	4
PGPT0013175	INDIRECT_EFFECTS	STRESS_CONTROL|BIOCONTROL	NEUTRALIZING_ABIOTIC_STRESS	NITROSATIVE|OXIDATIVE_STRESS|ROS_SCAVENGING	DETOXIFICATION_OF_PEROXIDIZED_COMPOUNDS	PGPT0013175-gor-K00383	0	2	1	1
PGPT0013180	INDIRECT_EFFECTS	STRESS_CONTROL|BIOCONTROL	NEUTRALIZING_ABIOTIC_STRESS	NITROSATIVE|OXIDATIVE_STRESS|ROS_SCAVENGING	DETOXIFICATION_OF_SUPEROXIDE_ANION_RADICALS	PGPT0013180-sodN-K00518	1	0	0	0
PGPT0013181	INDIRECT_EFFECTS	STRESS_CONTROL|BIOCONTROL	NEUTRALIZING_ABIOTIC_STRESS	NITROSATIVE|OXIDATIVE_STRESS|ROS_SCAVENGING	DETOXIFICATION_OF_SUPEROXIDE_ANION_RADICALS	PGPT0013181-sodC|sod1-K04565	0	1	0	0
PGPT0013195	INDIRECT_EFFECTS	STRESS_CONTROL|BIOCONTROL	NEUTRALIZING_ABIOTIC_STRESS	NITROSATIVE|OXIDATIVE_STRESS|ROS_SCAVENGING	DETOXIFICATION_OF_SUPEROXIDE_ANION_RADICALS	PGPT0013195-cybB-K12262	0	3	1	0
PGPT0013201	INDIRECT_EFFECTS	STRESS_CONTROL|BIOCONTROL	NEUTRALIZING_ABIOTIC_STRESS	NITROSATIVE|OXIDATIVE_STRESS|ROS_SCAVENGING	OXIDATIVE_STRESS-CHAPERONES	PGPT0013201-grxC-K03676	0	1	1	1
PGPT0013203	INDIRECT_EFFECTS	STRESS_CONTROL|BIOCONTROL	NEUTRALIZING_ABIOTIC_STRESS	NITROSATIVE|OXIDATIVE_STRESS|ROS_SCAVENGING	OXIDATIVE_STRESS-CHAPERONES	PGPT0013203-grxD-K07390	0	1	1	1
PGPT0013205	INDIRECT_EFFECTS	STRESS_CONTROL|BIOCONTROL	NEUTRALIZING_ABIOTIC_STRESS	NITROSATIVE|OXIDATIVE_STRESS|ROS_SCAVENGING	OXIDATIVE_STRESS-OXIDOREDUCTASES	PGPT0013205-hcr-K11933	0	0	0	1
PGPT0013210	INDIRECT_EFFECTS	STRESS_CONTROL|BIOCONTROL	NEUTRALIZING_ABIOTIC_STRESS	NITROSATIVE|OXIDATIVE_STRESS|ROS_SCAVENGING	OXIDATIVE_STRESS-OXIDOREDUCTASES	PGPT0013210-ydhL-K06938	0	2	0	0
PGPT0013215	INDIRECT_EFFECTS	STRESS_CONTROL|BIOCONTROL	NEUTRALIZING_ABIOTIC_STRESS	NITROSATIVE|OXIDATIVE_STRESS|ROS_SCAVENGING	OXIDATIVE_STRESS-OXIDOREDUCTASES	PGPT0013215-fpr-K00528	3	1	0	1
PGPT0013220	INDIRECT_EFFECTS	STRESS_CONTROL|BIOCONTROL	NEUTRALIZING_ABIOTIC_STRESS	NITROSATIVE|OXIDATIVE_STRESS|ROS_SCAVENGING	OXIDATIVE_STRESS-OXIDOREDUCTASES# PGPT	PGPT0013220-dltE-K14189	0	0	1	0
PGPT0013245	INDIRECT_EFFECTS	STRESS_CONTROL|BIOCONTROL	NEUTRALIZING_ABIOTIC_STRESS	NITROSATIVE|OXIDATIVE_STRESS|ROS_SCAVENGING	OXIDATIVE_STRESS-OXIDOREDUCTASES	PGPT0013245-hcxA|ybdH-K08317	0	0	0	2
PGPT0013250	INDIRECT_EFFECTS	STRESS_CONTROL|BIOCONTROL	NEUTRALIZING_ABIOTIC_STRESS	NITROSATIVE|OXIDATIVE_STRESS|ROS_SCAVENGING	OXIDATIVE_STRESS-OXIDOREDUCTASES	PGPT0013250-hcxB|ybiC-K13574	0	1	1	0
PGPT0013255	INDIRECT_EFFECTS	STRESS_CONTROL|BIOCONTROL	NEUTRALIZING_ABIOTIC_STRESS	NITROSATIVE|OXIDATIVE_STRESS|ROS_SCAVENGING	OXIDATIVE_STRESS-OXIDOREDUCTASES	PGPT0013255-qor-K00344	6	5	4	2
PGPT0013260	INDIRECT_EFFECTS	STRESS_CONTROL|BIOCONTROL	NEUTRALIZING_ABIOTIC_STRESS	NITROSATIVE|OXIDATIVE_STRESS|ROS_SCAVENGING	OXIDATIVE_STRESS-OXIDOREDUCTASES# PGPT	PGPT0013260-rnfA|rsxA-K03617	0	0	0	2
PGPT0013265	INDIRECT_EFFECTS	STRESS_CONTROL|BIOCONTROL	NEUTRALIZING_ABIOTIC_STRESS	NITROSATIVE|OXIDATIVE_STRESS|ROS_SCAVENGING	OXIDATIVE_STRESS-OXIDOREDUCTASES# PGPT	PGPT0013265-rnfB|rsxB-K03616	0	1	0	0
PGPT0013275	INDIRECT_EFFECTS	STRESS_CONTROL|BIOCONTROL	NEUTRALIZING_ABIOTIC_STRESS	NITROSATIVE|OXIDATIVE_STRESS|ROS_SCAVENGING	OXIDATIVE_STRESS-OXIDOREDUCTASES# PGPT	PGPT0013275-rnfD|rsxD-K03614	0	0	0	1
PGPT0013280	INDIRECT_EFFECTS	STRESS_CONTROL|BIOCONTROL	NEUTRALIZING_ABIOTIC_STRESS	NITROSATIVE|OXIDATIVE_STRESS|ROS_SCAVENGING	OXIDATIVE_STRESS-OXIDOREDUCTASES# PGPT	PGPT0013280-rnfE|rsxE-K03613	0	0	0	1
PGPT0013285	INDIRECT_EFFECTS	STRESS_CONTROL|BIOCONTROL	NEUTRALIZING_ABIOTIC_STRESS	NITROSATIVE|OXIDATIVE_STRESS|ROS_SCAVENGING	OXIDATIVE_STRESS-OXIDOREDUCTASES# PGPT	PGPT0013285-rnfG|rsxE-K03612	0	0	0	1
PGPT0013300	INDIRECT_EFFECTS	STRESS_CONTROL|BIOCONTROL	NEUTRALIZING_ABIOTIC_STRESS	NITROSATIVE|OXIDATIVE_STRESS|ROS_SCAVENGING	OXIDATIVE_STRESS-LACTOYLGLUTATHIONE_LYASE# PGPT	PGPT0013300-gloA|ywbC-K01759	1	3	2	1
PGPT0013305	INDIRECT_EFFECTS	STRESS_CONTROL|BIOCONTROL	NEUTRALIZING_ABIOTIC_STRESS	NEUTRALIZING_OSMOTIC_STRESS	OSMOTIC_STRESS-GLYCINE-BETAINE_METABOLISM	PGPT0013305-osmY-K04065	0	3	0	2
PGPT0013310	INDIRECT_EFFECTS	STRESS_CONTROL|BIOCONTROL	NEUTRALIZING_ABIOTIC_STRESS	NITROSATIVE|OXIDATIVE_STRESS|ROS_SCAVENGING	OXIDATIVE_STRESS-ARYLPOLYENE_BIOSYNTHESIS# PGPT	PGPT0013310-fabB-K00647	0	0	1	1
PGPT0013315	INDIRECT_EFFECTS	STRESS_CONTROL|BIOCONTROL	NEUTRALIZING_ABIOTIC_STRESS	NITROSATIVE|OXIDATIVE_STRESS|ROS_SCAVENGING	OXIDATIVE_STRESS-ARYLPOLYENE_BIOSYNTHESIS# PGPT	PGPT0013315-lpxL|htrB-K02517	0	2	1	0
PGPT0013320	INDIRECT_EFFECTS	STRESS_CONTROL|BIOCONTROL	NEUTRALIZING_ABIOTIC_STRESS	NITROSATIVE|OXIDATIVE_STRESS|ROS_SCAVENGING	OXIDATIVE_STRESS-ARYLPOLYENE_BIOSYNTHESIS	PGPT0013320-mdoH-K03669	0	1	2	3
PGPT0013325	INDIRECT_EFFECTS	STRESS_CONTROL|BIOCONTROL	NEUTRALIZING_ABIOTIC_STRESS	NITROSATIVE|OXIDATIVE_STRESS|ROS_SCAVENGING	OXIDATIVE_STRESS-ARYLPOLYENE_BIOSYNTHESIS# PGPT	PGPT0013325-mdoG-K03670	0	2	6	5
PGPT0013330	INDIRECT_EFFECTS	STRESS_CONTROL|BIOCONTROL	NEUTRALIZING_ABIOTIC_STRESS	NITROSATIVE|OXIDATIVE_STRESS|ROS_SCAVENGING	OXIDATIVE_STRESS-ARYLPOLYENE_BIOSYNTHESIS	PGPT0013330-UPF0176_protein-K07146	1	3	3	4
PGPT0013335	INDIRECT_EFFECTS	STRESS_CONTROL|BIOCONTROL	NEUTRALIZING_ABIOTIC_STRESS	NITROSATIVE|OXIDATIVE_STRESS|ROS_SCAVENGING	OXIDATIVE_STRESS-ARYLPOLYENE_BIOSYNTHESIS	PGPT0013335-mdoC|glucans_biosynthesis_protein_C_EC_2_1_X_X-K11941	0	0	0	1
PGPT0013345	INDIRECT_EFFECTS	STRESS_CONTROL|BIOCONTROL	NEUTRALIZING_ABIOTIC_STRESS	NITROSATIVE|OXIDATIVE_STRESS|ROS_SCAVENGING	OXIDATIVE_STRESS-ARYLPOLYENE_BIOSYNTHESIS	PGPT0013345-ABC_CD_A-K02003	8	2	3	2
PGPT0013350	INDIRECT_EFFECTS	STRESS_CONTROL|BIOCONTROL	NEUTRALIZING_ABIOTIC_STRESS	NITROSATIVE|OXIDATIVE_STRESS|ROS_SCAVENGING	OXIDATIVE_STRESS-ARYLPOLYENE_BIOSYNTHESIS	PGPT0013350-ABC_CD_P-K02004	10	3	2	1
PGPT0013355	INDIRECT_EFFECTS	STRESS_CONTROL|BIOCONTROL	NEUTRALIZING_ABIOTIC_STRESS	NITROSATIVE|OXIDATIVE_STRESS|ROS_SCAVENGING	OXIDATIVE_STRESS-VITAMIN_B3|NIACIN_BIOSYNTHESIS# PGPT	PGPT0013355-nadB-K00278	1	1	0	1
PGPT0013360	INDIRECT_EFFECTS	STRESS_CONTROL|BIOCONTROL	NEUTRALIZING_ABIOTIC_STRESS	NITROSATIVE|OXIDATIVE_STRESS|ROS_SCAVENGING	OXIDATIVE_STRESS-VITAMIN_B3|NIACIN_BIOSYNTHESIS# PGPT	PGPT0013360-nadX-K06989	0	1	1	0
PGPT0013365	INDIRECT_EFFECTS	STRESS_CONTROL|BIOCONTROL	NEUTRALIZING_ABIOTIC_STRESS	NITROSATIVE|OXIDATIVE_STRESS|ROS_SCAVENGING	OXIDATIVE_STRESS-VITAMIN_B3|NIACIN_BIOSYNTHESIS# PGPT	PGPT0013365-nadA-K03517	1	1	0	1
PGPT0013370	INDIRECT_EFFECTS	STRESS_CONTROL|BIOCONTROL	NEUTRALIZING_ABIOTIC_STRESS	NITROSATIVE|OXIDATIVE_STRESS|ROS_SCAVENGING	OXIDATIVE_STRESS-VITAMIN_B3|NIACIN_BIOSYNTHESIS# PGPT	PGPT0013370-nadC-K00767	1	2	1	2
PGPT0013375	INDIRECT_EFFECTS	STRESS_CONTROL|BIOCONTROL	NEUTRALIZING_ABIOTIC_STRESS	NITROSATIVE|OXIDATIVE_STRESS|ROS_SCAVENGING	OXIDATIVE_STRESS-VITAMIN_B3|NIACIN_BIOSYNTHESIS# PGPT	PGPT0013375-pncB-K00763	1	2	1	2
PGPT0013380	INDIRECT_EFFECTS	STRESS_CONTROL|BIOCONTROL	NEUTRALIZING_ABIOTIC_STRESS	NITROSATIVE|OXIDATIVE_STRESS|ROS_SCAVENGING	OXIDATIVE_STRESS-VITAMIN_B3|NIACIN_BIOSYNTHESIS# PGPT	PGPT0013380-punA-K03783	1	0	1	0
PGPT0013385	INDIRECT_EFFECTS	STRESS_CONTROL|BIOCONTROL	NEUTRALIZING_ABIOTIC_STRESS	NITROSATIVE|OXIDATIVE_STRESS|ROS_SCAVENGING	OXIDATIVE_STRESS-VITAMIN_B3|NIACIN_BIOSYNTHESIS# PGPT	PGPT0013385-deoD-K03784	0	0	0	2
PGPT0013390	INDIRECT_EFFECTS	STRESS_CONTROL|BIOCONTROL	NEUTRALIZING_ABIOTIC_STRESS	NITROSATIVE|OXIDATIVE_STRESS|ROS_SCAVENGING	OXIDATIVE_STRESS-VITAMIN_B3|NIACIN_BIOSYNTHESIS# PGPT	PGPT0013390-nadR-K06211	0	0	0	2
PGPT0013395	INDIRECT_EFFECTS	STRESS_CONTROL|BIOCONTROL	NEUTRALIZING_ABIOTIC_STRESS	NITROSATIVE|OXIDATIVE_STRESS|ROS_SCAVENGING	OXIDATIVE_STRESS-VITAMIN_B3|NIACIN_BIOSYNTHESIS# PGPT	PGPT0013395-nucA|ushA|yhcR|yfkN-K01081	2	0	0	0
PGPT0013400	INDIRECT_EFFECTS	STRESS_CONTROL|BIOCONTROL	NEUTRALIZING_ABIOTIC_STRESS	NITROSATIVE|OXIDATIVE_STRESS|ROS_SCAVENGING	OXIDATIVE_STRESS-VITAMIN_B3|NIACIN_BIOSYNTHESIS# PGPT	PGPT0013400-ushA-K11751	0	1	2	1
PGPT0013405	INDIRECT_EFFECTS	STRESS_CONTROL|BIOCONTROL	NEUTRALIZING_ABIOTIC_STRESS	NITROSATIVE|OXIDATIVE_STRESS|ROS_SCAVENGING	OXIDATIVE_STRESS-VITAMIN_B3|NIACIN_BIOSYNTHESIS# PGPT	PGPT0013405-surE-K03787	0	2	1	1
PGPT0013410	INDIRECT_EFFECTS	STRESS_CONTROL|BIOCONTROL	NEUTRALIZING_ABIOTIC_STRESS	NITROSATIVE|OXIDATIVE_STRESS|ROS_SCAVENGING	OXIDATIVE_STRESS-VITAMIN_B3|NIACIN_BIOSYNTHESIS# PGPT	PGPT0013410-yjjG-K08723	0	0	0	2
PGPT0013430	INDIRECT_EFFECTS	STRESS_CONTROL|BIOCONTROL	NEUTRALIZING_ABIOTIC_STRESS	NITROSATIVE|OXIDATIVE_STRESS|ROS_SCAVENGING	OXIDATIVE_STRESS-VITAMIN_B3|NIACIN_BIOSYNTHESIS# PGPT	PGPT0013430-nadM2-K13522	1	0	0	0
PGPT0013435	INDIRECT_EFFECTS	STRESS_CONTROL|BIOCONTROL	NEUTRALIZING_ABIOTIC_STRESS	NITROSATIVE|OXIDATIVE_STRESS|ROS_SCAVENGING	OXIDATIVE_STRESS-VITAMIN_B3|NIACIN_BIOSYNTHESIS# PGPT	PGPT0013435-nadD-K00969	2	2	2	0
PGPT0013440	INDIRECT_EFFECTS	STRESS_CONTROL|BIOCONTROL	NEUTRALIZING_ABIOTIC_STRESS	NITROSATIVE|OXIDATIVE_STRESS|ROS_SCAVENGING	OXIDATIVE_STRESS-VITAMIN_B3|NIACIN_BIOSYNTHESIS# PGPT	PGPT0013440-nudC-K03426	1	1	1	1
PGPT0013450	INDIRECT_EFFECTS	STRESS_CONTROL|BIOCONTROL	NEUTRALIZING_ABIOTIC_STRESS	NITROSATIVE|OXIDATIVE_STRESS|ROS_SCAVENGING	OXIDATIVE_STRESS-VITAMIN_B3|NIACIN_BIOSYNTHESIS# PGPT	PGPT0013450-nadE2-K01950	1	1	2	0
PGPT0013455	INDIRECT_EFFECTS	STRESS_CONTROL|BIOCONTROL	NEUTRALIZING_ABIOTIC_STRESS	NITROSATIVE|OXIDATIVE_STRESS|ROS_SCAVENGING	OXIDATIVE_STRESS-VITAMIN_B3|NIACIN_BIOSYNTHESIS# PGPT	PGPT0013455-pncC-K03742	0	1	0	1
PGPT0013460	INDIRECT_EFFECTS	STRESS_CONTROL|BIOCONTROL	NEUTRALIZING_ABIOTIC_STRESS	NITROSATIVE|OXIDATIVE_STRESS|ROS_SCAVENGING	OXIDATIVE_STRESS-VITAMIN_B3|NIACIN_BIOSYNTHESIS# PGPT	PGPT0013460-pncC2-K03743	1	1	1	1
PGPT0013465	INDIRECT_EFFECTS	STRESS_CONTROL|BIOCONTROL	NEUTRALIZING_ABIOTIC_STRESS	NITROSATIVE|OXIDATIVE_STRESS|ROS_SCAVENGING	OXIDATIVE_STRESS-VITAMIN_B3|NIACIN_BIOSYNTHESIS# PGPT	PGPT0013465-iunH-K01239	0	0	0	2
PGPT0013470	INDIRECT_EFFECTS	STRESS_CONTROL|BIOCONTROL	NEUTRALIZING_ABIOTIC_STRESS	NITROSATIVE|OXIDATIVE_STRESS|ROS_SCAVENGING	OXIDATIVE_STRESS-VITAMIN_B3|NIACIN_BIOSYNTHESIS# PGPT	PGPT0013470-pncA-K08281	1	1	1	2
PGPT0013485	INDIRECT_EFFECTS	STRESS_CONTROL|BIOCONTROL	NEUTRALIZING_ABIOTIC_STRESS	NITROSATIVE|OXIDATIVE_STRESS|ROS_SCAVENGING	OXIDATIVE_STRESS-VITAMIN_B3|NIACIN_BIOSYNTHESIS# PGPT	PGPT0013485-npdA-K12410	2	2	1	0
PGPT0013490	INDIRECT_EFFECTS	STRESS_CONTROL|BIOCONTROL	NEUTRALIZING_ABIOTIC_STRESS	NITROSATIVE|OXIDATIVE_STRESS|ROS_SCAVENGING	OXIDATIVE_STRESS-VITAMIN_B3|NIACIN_BIOSYNTHESIS# PGPT	PGPT0013490-ppnK-K00858	1	1	2	1
PGPT0013495	INDIRECT_EFFECTS	STRESS_CONTROL|BIOCONTROL	NEUTRALIZING_ABIOTIC_STRESS	NITROSATIVE|OXIDATIVE_STRESS|ROS_SCAVENGING	OXIDATIVE_STRESS-VITAMIN_B3|NIACIN_BIOSYNTHESIS# PGPT	PGPT0013495-sthA-K00322	0	0	0	2
PGPT0013500	INDIRECT_EFFECTS	STRESS_CONTROL|BIOCONTROL	NEUTRALIZING_ABIOTIC_STRESS	NITROSATIVE|OXIDATIVE_STRESS|ROS_SCAVENGING	OXIDATIVE_STRESS-VITAMIN_B3|NIACIN_BIOSYNTHESIS# PGPT	PGPT0013500-pntA-K00324	1	2	0	1
PGPT0013505	INDIRECT_EFFECTS	STRESS_CONTROL|BIOCONTROL	NEUTRALIZING_ABIOTIC_STRESS	NITROSATIVE|OXIDATIVE_STRESS|ROS_SCAVENGING	OXIDATIVE_STRESS-VITAMIN_B3|NIACIN_BIOSYNTHESIS# PGPT	PGPT0013505-pntB-K00325	1	1	1	1
PGPT0013510	INDIRECT_EFFECTS	STRESS_CONTROL|BIOCONTROL	NEUTRALIZING_ABIOTIC_STRESS	NEUTRALIZING_OSMOTIC_STRESS	OSMOTIC_STRESS-GLYCINE-BETAINE_METABOLISM	PGPT0013510-soxB_-K00303	0	0	5	0
PGPT0013515	INDIRECT_EFFECTS	STRESS_CONTROL|BIOCONTROL	NEUTRALIZING_ABIOTIC_STRESS	NEUTRALIZING_OSMOTIC_STRESS	OSMOTIC_STRESS-GLYCINE-BETAINE_METABOLISM# PGPT	PGPT0013515-soxA-K00302	0	0	1	0
PGPT0013520	INDIRECT_EFFECTS	STRESS_CONTROL|BIOCONTROL	NEUTRALIZING_ABIOTIC_STRESS	NEUTRALIZING_OSMOTIC_STRESS	OSMOTIC_STRESS-GLYCINE-BETAINE_METABOLISM	PGPT0013520-soxD-K00304	0	0	1	0
PGPT0013525	INDIRECT_EFFECTS	STRESS_CONTROL|BIOCONTROL	NEUTRALIZING_ABIOTIC_STRESS	NEUTRALIZING_OSMOTIC_STRESS	OSMOTIC_STRESS-GLYCINE-BETAINE_METABOLISM	PGPT0013525-soxG-K00305	0	0	1	0
PGPT0013530	INDIRECT_EFFECTS	STRESS_CONTROL|BIOCONTROL	NEUTRALIZING_ABIOTIC_STRESS	NEUTRALIZING_OSMOTIC_STRESS	OSMOTIC_STRESS-GLYCINE-BETAINE_METABOLISM	PGPT0013530-soxA|solA-K00301	0	0	2	0
PGPT0013550	INDIRECT_EFFECTS	STRESS_CONTROL|BIOCONTROL	NEUTRALIZING_ABIOTIC_STRESS	NEUTRALIZING_OSMOTIC_STRESS	OSMOTIC_STRESS-GLYCINE-BETAINE_METABOLISM	PGPT0013550-DMGDH_lile|gcvT|mlr-K00315	1	0	1	0
PGPT0013585	INDIRECT_EFFECTS	STRESS_CONTROL|BIOCONTROL	NEUTRALIZING_ABIOTIC_STRESS	NEUTRALIZING_OSMOTIC_STRESS	OSMOTIC_STRESS-GLYCINE-BETAINE_METABOLISM	PGPT0013585-opuA|osmV|yehX-K05847	1	1	1	1
PGPT0013589	INDIRECT_EFFECTS	STRESS_CONTROL|BIOCONTROL	NEUTRALIZING_ABIOTIC_STRESS	NEUTRALIZING_OSMOTIC_STRESS	OSMOTIC_STRESS-GLYCINE-BETAINE_METABOLISM	PGPT0013589-opuCA-NA	0	3	0	0
PGPT0013590	INDIRECT_EFFECTS	STRESS_CONTROL|BIOCONTROL	NEUTRALIZING_ABIOTIC_STRESS	NEUTRALIZING_OSMOTIC_STRESS	OSMOTIC_STRESS-GLYCINE-BETAINE_METABOLISM	PGPT0013590-opuBD|yehW-K05846	2	4	2	2
PGPT0013595	INDIRECT_EFFECTS	STRESS_CONTROL|BIOCONTROL	NEUTRALIZING_ABIOTIC_STRESS	NEUTRALIZING_OSMOTIC_STRESS	OSMOTIC_STRESS-GLYCINE-BETAINE_METABOLISM	PGPT0013595-opuC|yehZ-K05845	1	1	1	2
PGPT0013600	INDIRECT_EFFECTS	STRESS_CONTROL|BIOCONTROL	NEUTRALIZING_ABIOTIC_STRESS	NEUTRALIZING_OSMOTIC_STRESS	OSMOTIC_STRESS-GLYCINE-BETAINE_METABOLISM	PGPT0013600-opuD|ytfQ-K05020	1	0	0	1
PGPT0013610	INDIRECT_EFFECTS	STRESS_CONTROL|BIOCONTROL	NEUTRALIZING_ABIOTIC_STRESS	NEUTRALIZING_OSMOTIC_STRESS	OSMOTIC_STRESS-GLYCINE-BETAINE_METABOLISM	PGPT0013610-cmo|bphA-K00499	0	1	0	0
PGPT0013615	INDIRECT_EFFECTS	STRESS_CONTROL|BIOCONTROL	NEUTRALIZING_ABIOTIC_STRESS	NEUTRALIZING_OSMOTIC_STRESS	OSMOTIC_STRESS-GLYCINE-BETAINE_METABOLISM	PGPT0013615-betA|CHDH-K00108	0	4	1	1
PGPT0013620	INDIRECT_EFFECTS	STRESS_CONTROL|BIOCONTROL	NEUTRALIZING_ABIOTIC_STRESS	NEUTRALIZING_OSMOTIC_STRESS	OSMOTIC_STRESS-GLYCINE-BETAINE_METABOLISM# PGPT	PGPT0013620-betC-K01133	0	2	0	0
PGPT0013625	INDIRECT_EFFECTS	STRESS_CONTROL|BIOCONTROL	NEUTRALIZING_ABIOTIC_STRESS	NEUTRALIZING_OSMOTIC_STRESS	OSMOTIC_STRESS-GLYCINE-BETAINE_METABOLISM	PGPT0013625-betI-K02167	1	0	0	1
PGPT0013630	INDIRECT_EFFECTS	STRESS_CONTROL|BIOCONTROL	NEUTRALIZING_ABIOTIC_STRESS	NEUTRALIZING_OSMOTIC_STRESS	OSMOTIC_STRESS-GLYCINE-BETAINE_METABOLISM# PGPT	PGPT0013630-gbuA|proV-K02000	0	0	0	1
PGPT0013635	INDIRECT_EFFECTS	STRESS_CONTROL|BIOCONTROL	NEUTRALIZING_ABIOTIC_STRESS	NEUTRALIZING_OSMOTIC_STRESS	OSMOTIC_STRESS-GLYCINE-BETAINE_METABOLISM# PGPT	PGPT0013635-gbuB|proW-K02001	0	0	1	1
PGPT0013640	INDIRECT_EFFECTS	STRESS_CONTROL|BIOCONTROL	NEUTRALIZING_ABIOTIC_STRESS	NEUTRALIZING_OSMOTIC_STRESS	OSMOTIC_STRESS-GLYCINE-BETAINE_METABOLISM# PGPT	PGPT0013640-gbuC|proX-K02002	0	0	1	1
PGPT0013645	INDIRECT_EFFECTS	STRESS_CONTROL|BIOCONTROL	NEUTRALIZING_ABIOTIC_STRESS	NEUTRALIZING_OSMOTIC_STRESS	OSMOTIC_STRESS-GLYCINE-BETAINE_METABOLISM# PGPT	PGPT0013645-proP-K03762	0	4	3	5
PGPT0013650	INDIRECT_EFFECTS	STRESS_CONTROL|BIOCONTROL	NEUTRALIZING_ABIOTIC_STRESS	NEUTRALIZING_OSMOTIC_STRESS	OSMOTIC_STRESS-GLYCINE-BETAINE_METABOLISM	PGPT0013650-proQ-K03607	0	0	0	1
PGPT0013680	INDIRECT_EFFECTS	STRESS_CONTROL|BIOCONTROL	NEUTRALIZING_ABIOTIC_STRESS	NEUTRALIZING_OSMOTIC_STRESS	OSMOTIC_STRESS-GLYCINE-BETAINE_METABOLISM	PGPT0013680-gbcA-K00479	0	0	1	0
PGPT0013685	INDIRECT_EFFECTS	STRESS_CONTROL|BIOCONTROL	NEUTRALIZING_ABIOTIC_STRESS	NEUTRALIZING_OSMOTIC_STRESS	OSMOTIC_STRESS-GLYCINE-BETAINE_METABOLISM	PGPT0013685-gbcB-K21832	3	1	2	0
PGPT0013690	INDIRECT_EFFECTS	STRESS_CONTROL|BIOCONTROL	NEUTRALIZING_ABIOTIC_STRESS	NEUTRALIZING_OSMOTIC_STRESS	OSMOTIC_STRESS-GLYCINE-BETAINE_METABOLISM	PGPT0013690-gbsR-K22109	0	1	0	0
PGPT0013695	INDIRECT_EFFECTS	STRESS_CONTROL|BIOCONTROL	NEUTRALIZING_ABIOTIC_STRESS	NEUTRALIZING_OSMOTIC_STRESS	OSMOTIC_STRESS-MECHANOSENSITIVE_ION_CHANNEL	PGPT0013695-ykuT|ybiO-K22044	1	2	1	3
PGPT0013700	INDIRECT_EFFECTS	STRESS_CONTROL|BIOCONTROL	NEUTRALIZING_ABIOTIC_STRESS	NEUTRALIZING_OSMOTIC_STRESS	OSMOTIC_STRESS-MANNITOL_BIOSYNTHESIS# PGPT	PGPT0013700-mtlD-K00009	0	0	0	2
PGPT0013725	DIRECT_EFFECTS	BIO-FERTILIZATION	IRON_ACQUISITION	IRON_ACQUISITION-SIDEROPHORES	SIDEROPHORES-DESFERRIOXAMINE-BIOSYNTHESIS# PGPT	PGPT0013725-ddc|dfoJ|desA-K13745	1	0	0	1
PGPT0013730	INDIRECT_EFFECTS	STRESS_CONTROL|BIOCONTROL	NEUTRALIZING_ABIOTIC_STRESS	NEUTRALIZING_OSMOTIC_STRESS	OSMOTIC_STRESS-SECRETION_SYSTEM# PGPT	PGPT0013730-yggT|ylmG-K02221	1	1	1	1
PGPT0013735	INDIRECT_EFFECTS	STRESS_CONTROL|BIOCONTROL	NEUTRALIZING_ABIOTIC_STRESS	NEUTRALIZING_OSMOTIC_STRESS	OSMOTIC_STRESS-OTHER_REGULATORS	PGPT0013735-nth-K10773	1	2	1	2
PGPT0013740	INDIRECT_EFFECTS	STRESS_CONTROL|BIOCONTROL	NEUTRALIZING_ABIOTIC_STRESS	NEUTRALIZING_OSMOTIC_STRESS	OSMOTIC_STRESS-OTHER_REGULATORS	PGPT0013740-rhlE-K11927	6	6	5	6
PGPT0013745	INDIRECT_EFFECTS	STRESS_CONTROL|BIOCONTROL	NEUTRALIZING_ABIOTIC_STRESS	NEUTRALIZING_OSMOTIC_STRESS	OSMOTIC_STRESS-OTHER_REGULATORS# PGPT	PGPT0013745-osmB-K04062	0	2	1	0
PGPT0013750	INDIRECT_EFFECTS	STRESS_CONTROL|BIOCONTROL	NEUTRALIZING_ABIOTIC_STRESS	NEUTRALIZING_OSMOTIC_STRESS	OSMOTIC_STRESS-OTHER_REGULATORS# PGPT	PGPT0013750-emrB-K03543	0	5	2	7
PGPT0013755	INDIRECT_EFFECTS	STRESS_CONTROL|BIOCONTROL	NEUTRALIZING_ABIOTIC_STRESS	NEUTRALIZING_OSMOTIC_STRESS	OSMOTIC_STRESS_SIGNALLUING# PGPT	PGPT0013755-osmE-K04064	0	0	0	1
PGPT0013771	INDIRECT_EFFECTS	STRESS_CONTROL|BIOCONTROL	NEUTRALIZING_ABIOTIC_STRESS	NEUTRALIZING_OSMOTIC_STRESS	OSMOTIC_STRESS-MECHANOSENSITIVE_ION_CHANNEL	PGPT0013771-mscL-K03282	0	1	1	0
PGPT0013772	INDIRECT_EFFECTS	STRESS_CONTROL|BIOCONTROL	NEUTRALIZING_ABIOTIC_STRESS	NEUTRALIZING_OSMOTIC_STRESS	OSMOTIC_STRESS-MECHANOSENSITIVE_ION_CHANNEL	PGPT0013772-mscM|bspA|yjeP-K22051	0	0	0	3
PGPT0013773	INDIRECT_EFFECTS	STRESS_CONTROL|BIOCONTROL	NEUTRALIZING_ABIOTIC_STRESS	NEUTRALIZING_OSMOTIC_STRESS	OSMOTIC_STRESS-MECHANOSENSITIVE_ION_CHANNEL	PGPT0013773-mscS|yggB-K03442	1	2	0	1
PGPT0013774	INDIRECT_EFFECTS	STRESS_CONTROL|BIOCONTROL	NEUTRALIZING_ABIOTIC_STRESS	NEUTRALIZING_OSMOTIC_STRESS	OSMOTIC_STRESS-MECHANOSENSITIVE_ION_CHANNEL	PGPT0013774-mscM|ybdG-K16053	0	1	0	2
PGPT0013790	INDIRECT_EFFECTS	STRESS_CONTROL|BIOCONTROL	NEUTRALIZING_ABIOTIC_STRESS	NEUTRALIZING_OSMOTIC_STRESS	OSMOTIC_STRESS-POTASSIUM_TRANSPORT# PGPT	PGPT0013790-sapC-K19228	0	0	0	1
PGPT0013795	INDIRECT_EFFECTS	STRESS_CONTROL|BIOCONTROL	NEUTRALIZING_ABIOTIC_STRESS	NEUTRALIZING_OSMOTIC_STRESS	OSMOTIC_STRESS-POTASSIUM_TRANSPORT# PGPT	PGPT0013795-kefB-K11747	0	0	1	1
PGPT0013800	INDIRECT_EFFECTS	STRESS_CONTROL|BIOCONTROL	NEUTRALIZING_ABIOTIC_STRESS	NEUTRALIZING_OSMOTIC_STRESS	OSMOTIC_STRESS-POTASSIUM_TRANSPORT# PGPT	PGPT0013800-kefC-K11745	0	1	0	2
PGPT0013805	INDIRECT_EFFECTS	STRESS_CONTROL|BIOCONTROL	NEUTRALIZING_ABIOTIC_STRESS	NEUTRALIZING_OSMOTIC_STRESS	OSMOTIC_STRESS-POTASSIUM_TRANSPORT# PGPT	PGPT0013805-kefF-K11746	0	1	0	1
PGPT0013810	INDIRECT_EFFECTS	STRESS_CONTROL|BIOCONTROL	NEUTRALIZING_ABIOTIC_STRESS	NEUTRALIZING_OSMOTIC_STRESS	OSMOTIC_STRESS-POTASSIUM_TRANSPORT# PGPT	PGPT0013810-kefG-K11748	0	0	0	1
PGPT0013825	INDIRECT_EFFECTS	STRESS_CONTROL|BIOCONTROL	NEUTRALIZING_ABIOTIC_STRESS	NEUTRALIZING_OSMOTIC_STRESS	OSMOTIC_STRESS-MECHANOSENSITIVE_ION_CHANNEL# PGPT	PGPT0013825-mscK|kefA|aefA-K05802	0	3	1	2
PGPT0013860	INDIRECT_EFFECTS	STRESS_CONTROL|BIOCONTROL	NEUTRALIZING_ABIOTIC_STRESS	NEUTRALIZING_OSMOTIC_STRESS	OSMOTIC_STRESS-POTASSIUM_TRANSPORT# PGPT	PGPT0013860-cvrA|nhaP2-K11105	1	1	0	0
PGPT0013865	INDIRECT_EFFECTS	STRESS_CONTROL|BIOCONTROL	NEUTRALIZING_ABIOTIC_STRESS	NEUTRALIZING_SALINITY_STRESS	SALINITY_STRESS-POTASSIUM_TRANSPORT	PGPT0013865-czcO|noxC|yrdP|trkA|hapE-K07222	2	0	0	0
PGPT0013890	INDIRECT_EFFECTS	STRESS_CONTROL|BIOCONTROL	NEUTRALIZING_ABIOTIC_STRESS	NEUTRALIZING_SALINITY_STRESS	SALINITY_STRESS-SODIUM_TRANSPORT	PGPT0013890-panS|yocS|ybaS-K03453	0	0	2	1
PGPT0013930	INDIRECT_EFFECTS	STRESS_CONTROL|BIOCONTROL	NEUTRALIZING_ABIOTIC_STRESS	NEUTRALIZING_SALINITY_STRESS	SALINITY_STRESS-SODIUM_TRANSPORT# PGPT	PGPT0013930-nhaK|TC_CPA1-K03316	1	0	0	2
PGPT0013935	INDIRECT_EFFECTS	STRESS_CONTROL|BIOCONTROL	NEUTRALIZING_ABIOTIC_STRESS	NEUTRALIZING_SALINITY_STRESS	SALINITY_STRESS-SODIUM_TRANSPORT# PGPT	PGPT0013935-nhaA-K03313	2	0	2	1
PGPT0013946	INDIRECT_EFFECTS	STRESS_CONTROL|BIOCONTROL	NEUTRALIZING_ABIOTIC_STRESS	NEUTRALIZING_SALINITY_STRESS	SALINITY_STRESS-SODIUM_TRANSPORT	PGPT0013946-nhaR-K03717	0	0	0	2
PGPT0013955	INDIRECT_EFFECTS	STRESS_CONTROL|BIOCONTROL	NEUTRALIZING_ABIOTIC_STRESS	NEUTRALIZING_SALINITY_STRESS	SALINITY_STRESS-SODIUM_TRANSPORT# PGPT	PGPT0013955-TC_SSS|yerK|opuE-K03307	2	1	0	1
PGPT0013960	DIRECT_EFFECTS	BIO-FERTILIZATION	PHOSPHATE_SOLUBILIZATION	P-SOLUBILISATION-ORGANIC_ACID_METABOLISM	P-SOLUBILISATION-KETO-|OXOGLUTARATE_TRANSPORT# PGPT	PGPT0013960-TC_DASS|yflS-K03319	0	1	0	1
PGPT0013965	INDIRECT_EFFECTS	STRESS_CONTROL|BIOCONTROL	NEUTRALIZING_ABIOTIC_STRESS	NEUTRALIZING_SALINITY_STRESS	SALINITY_STRESS-SODIUM_TRANSPORT# PGPT	PGPT0013965-TC_DAACS-K03309	0	0	0	1
PGPT0013970	INDIRECT_EFFECTS	STRESS_CONTROL|BIOCONTROL	NEUTRALIZING_ABIOTIC_STRESS	NEUTRALIZING_SALINITY_STRESS	SALINITY_STRESS-SODIUM_TRANSPORT# PGPT	PGPT0013970-putP|ycgO-K11928	0	0	0	2
PGPT0013975	INDIRECT_EFFECTS	STRESS_CONTROL|BIOCONTROL	NEUTRALIZING_ABIOTIC_STRESS	NEUTRALIZING_SALINITY_STRESS	SALINITY_STRESS-SODIUM_TRANSPORT# PGPT	PGPT0013975-nqrA-K00346	0	0	0	1
PGPT0013980	INDIRECT_EFFECTS	STRESS_CONTROL|BIOCONTROL	NEUTRALIZING_ABIOTIC_STRESS	NEUTRALIZING_SALINITY_STRESS	SALINITY_STRESS-CALCIUM_TRANSPORT# PGPT	PGPT0013980-TMEM165|gdt1-K23541	0	1	0	0
PGPT0013985	INDIRECT_EFFECTS	STRESS_CONTROL|BIOCONTROL	NEUTRALIZING_ABIOTIC_STRESS	NEUTRALIZING_SALINITY_STRESS	SALINITY_STRESS-CALCIUM_TRANSPORT# PGPT	PGPT0013985-chaA-K07300	0	0	1	1
PGPT0013990	INDIRECT_EFFECTS	STRESS_CONTROL|BIOCONTROL	NEUTRALIZING_ABIOTIC_STRESS	NEUTRALIZING_SALINITY_STRESS	SALINITY_STRESS-CALCIUM_TRANSPORT	PGPT0013990-yloB|ctpA-K01537	0	1	0	7
PGPT0013995	INDIRECT_EFFECTS	STRESS_CONTROL|BIOCONTROL	NEUTRALIZING_ABIOTIC_STRESS	NEUTRALIZING_SALINITY_STRESS	SALINITY_STRESS-MAGNESIUM_TRANSPORT	PGPT0013995-mgtE-K06213	1	0	1	1
PGPT0014005	INDIRECT_EFFECTS	STRESS_CONTROL|BIOCONTROL	NEUTRALIZING_ABIOTIC_STRESS	NEUTRALIZING_SALINITY_STRESS	SALINITY_STRESS-MAGNESIUM_TRANSPORT	PGPT0014005-mgtC-K07507	0	2	2	0
PGPT0014010	INDIRECT_EFFECTS	STRESS_CONTROL|BIOCONTROL	NEUTRALIZING_ABIOTIC_STRESS	NEUTRALIZING_SALINITY_STRESS	SALINITY_STRESS-MAGNESIUM_TRANSPORT	PGPT0014010-corA|yfjQ-K03284	1	3	1	1
PGPT0014012	INDIRECT_EFFECTS	STRESS_CONTROL|BIOCONTROL	NEUTRALIZING_ABIOTIC_STRESS	NEUTRALIZING_SALINITY_STRESS	SALINITY_STRESS-MAGNESIUM_TRANSPORT	PGPT0014012-yhdT-NA	1	0	0	0
PGPT0014015	INDIRECT_EFFECTS	STRESS_CONTROL|BIOCONTROL	NEUTRALIZING_ABIOTIC_STRESS	NEUTRALIZING_SALINITY_STRESS	SALINITY_STRESS-CHLORIDE_TRANSPORT	PGPT0014015-yfbK-K07114	3	3	1	0
PGPT0014040	INDIRECT_EFFECTS	STRESS_CONTROL|BIOCONTROL	NEUTRALIZING_ABIOTIC_STRESS	NEUTRALIZING_SALINITY_STRESS	SALINITY_STRESS-ECTOINE_METABOLISM# PGPT	PGPT0014040-lysC-K00928	1	1	1	2
PGPT0014045	INDIRECT_EFFECTS	STRESS_CONTROL|BIOCONTROL	NEUTRALIZING_ABIOTIC_STRESS	NEUTRALIZING_SALINITY_STRESS	SALINITY_STRESS-ECTOINE_METABOLISM	PGPT0014045-asd-K00133	1	2	1	3
PGPT0014047	INDIRECT_EFFECTS	STRESS_CONTROL|BIOCONTROL	NEUTRALIZING_ABIOTIC_STRESS	NEUTRALIZING_SALINITY_STRESS	SALINITY_STRESS-ECTOINE_METABOLISM	PGPT0014047-doeB-K15784	0	2	1	0
PGPT0014049	INDIRECT_EFFECTS	STRESS_CONTROL|BIOCONTROL	NEUTRALIZING_ABIOTIC_STRESS	NEUTRALIZING_SALINITY_STRESS	SALINITY_STRESS-ECTOINE_METABOLISM	PGPT0014049-doeX-K15782	1	8	10	3
PGPT0014050	INDIRECT_EFFECTS	STRESS_CONTROL|BIOCONTROL	NEUTRALIZING_ABIOTIC_STRESS	NEUTRALIZING_SALINITY_STRESS	SALINITY_STRESS-ECTOINE_METABOLISM	PGPT0014050-ectB|dat-K00836	0	0	0	2
PGPT0014055	INDIRECT_EFFECTS	STRESS_CONTROL|BIOCONTROL	NEUTRALIZING_ABIOTIC_STRESS	NEUTRALIZING_SALINITY_STRESS	SALINITY_STRESS-ECTOINE_METABOLISM	PGPT0014055-ectA-K06718	0	0	1	0
PGPT0014070	INDIRECT_EFFECTS	STRESS_CONTROL|BIOCONTROL	NEUTRALIZING_ABIOTIC_STRESS	NEUTRALIZING_SALINITY_STRESS	SALINITY_STRESS-TREHALOSE_METABOLISM# PGPT	PGPT0014070-EC_3_2_1_28|alpha_trehalase-K22934	0	1	1	0
PGPT0014075	INDIRECT_EFFECTS	STRESS_CONTROL|BIOCONTROL	NEUTRALIZING_ABIOTIC_STRESS	NEUTRALIZING_SALINITY_STRESS	SALINITY_STRESS-TREHALOSE_METABOLISM# PGPT	PGPT0014075-treB-K02819	0	0	0	1
PGPT0014080	INDIRECT_EFFECTS	STRESS_CONTROL|BIOCONTROL	NEUTRALIZING_ABIOTIC_STRESS	NEUTRALIZING_SALINITY_STRESS	SALINITY_STRESS-TREHALOSE_METABOLISM	PGPT0014080-treP-K05342	2	0	0	0
PGPT0014090	INDIRECT_EFFECTS	STRESS_CONTROL|BIOCONTROL	NEUTRALIZING_ABIOTIC_STRESS	NEUTRALIZING_SALINITY_STRESS	SALINITY_STRESS-TREHALOSE_METABOLISM# PGPT	PGPT0014090-crr-K02777	0	0	0	1
PGPT0014091	INDIRECT_EFFECTS	COLONIZING_PLANT_SYSTEM	COLONIZATION-PLANT_DERIVED_SUBSTRATE_USAGE	PLANT_DERIVED_CARBOHYDRATE_TRANSPORT	PLANT_DERIVED_GLUCOSE_PTS_SYSTEM_I# PGPT	PGPT0014091-malI-K16136	0	0	0	2
PGPT0014095	INDIRECT_EFFECTS	STRESS_CONTROL|BIOCONTROL	NEUTRALIZING_ABIOTIC_STRESS	NEUTRALIZING_SALINITY_STRESS	SALINITY_STRESS-TREHALOSE_METABOLISM# PGPT	PGPT0014095-treC-K01226	0	0	0	3
PGPT0014100	INDIRECT_EFFECTS	STRESS_CONTROL|BIOCONTROL	NEUTRALIZING_ABIOTIC_STRESS	NEUTRALIZING_SALINITY_STRESS	SALINITY_STRESS-TREHALOSE_METABOLISM# PGPT	PGPT0014100-glvA-K01232	0	0	0	3
PGPT0014105	INDIRECT_EFFECTS	STRESS_CONTROL|BIOCONTROL	NEUTRALIZING_ABIOTIC_STRESS	NEUTRALIZING_SALINITY_STRESS	SALINITY_STRESS-TREHALOSE_METABOLISM# PGPT	PGPT0014105-treR-K03485	0	0	0	3
PGPT0014120	INDIRECT_EFFECTS	STRESS_CONTROL|BIOCONTROL	NEUTRALIZING_ABIOTIC_STRESS	NEUTRALIZING_SALINITY_STRESS	SALINITY_STRESS-TREHALOSE_METABOLISM# PGPT	PGPT0014120-treS-K05343	3	2	1	0
PGPT0014125	INDIRECT_EFFECTS	STRESS_CONTROL|BIOCONTROL	NEUTRALIZING_ABIOTIC_STRESS	NEUTRALIZING_SALINITY_STRESS	SALINITY_STRESS-TREHALOSE_METABOLISM# PGPT	PGPT0014125-treY|glgY-K06044	1	1	1	0
PGPT0014130	INDIRECT_EFFECTS	STRESS_CONTROL|BIOCONTROL	NEUTRALIZING_ABIOTIC_STRESS	NEUTRALIZING_SALINITY_STRESS	SALINITY_STRESS-TREHALOSE_METABOLISM# PGPT	PGPT0014130-treZ|glgZ-K01236	2	2	3	2
PGPT0014135	INDIRECT_EFFECTS	STRESS_CONTROL|BIOCONTROL	NEUTRALIZING_ABIOTIC_STRESS	NEUTRALIZING_SALINITY_STRESS	SALINITY_STRESS-TREHALOSE_METABOLISM# PGPT	PGPT0014135-otsA-K00697	1	1	1	0
PGPT0014140	INDIRECT_EFFECTS	STRESS_CONTROL|BIOCONTROL	NEUTRALIZING_ABIOTIC_STRESS	NEUTRALIZING_SALINITY_STRESS	SALINITY_STRESS-TREHALOSE_METABOLISM# PGPT	PGPT0014140-otsB-K01087	2	1	1	0
PGPT0014145	INDIRECT_EFFECTS	STRESS_CONTROL|BIOCONTROL	NEUTRALIZING_ABIOTIC_STRESS	NEUTRALIZING_SALINITY_STRESS	SALINITY_STRESS-TREHALOSE_METABOLISM# PGPT	PGPT0014145-thuE-K10236	1	0	0	0
PGPT0014150	INDIRECT_EFFECTS	STRESS_CONTROL|BIOCONTROL	NEUTRALIZING_ABIOTIC_STRESS	NEUTRALIZING_SALINITY_STRESS	SALINITY_STRESS-TREHALOSE_METABOLISM# PGPT	PGPT0014150-thuF|sugA-K10237	1	0	0	0
PGPT0014155	INDIRECT_EFFECTS	STRESS_CONTROL|BIOCONTROL	NEUTRALIZING_ABIOTIC_STRESS	NEUTRALIZING_SALINITY_STRESS	SALINITY_STRESS-TREHALOSE_METABOLISM# PGPT	PGPT0014155-thuG|sugB-K10238	1	0	0	0
PGPT0014160	INDIRECT_EFFECTS	STRESS_CONTROL|BIOCONTROL	NEUTRALIZING_ABIOTIC_STRESS	NEUTRALIZING_SALINITY_STRESS	SALINITY_STRESS-TREHALOSE_METABOLISM# PGPT	PGPT0014160-malK|mtlK|thuK-K10111	0	0	0	2
PGPT0014185	INDIRECT_EFFECTS	STRESS_CONTROL|BIOCONTROL	NEUTRALIZING_ABIOTIC_STRESS	NEUTRALIZING_SALINITY_STRESS	SALINITY_STRESS-SUCROSE_METABOLSIM# PGPT	PGPT0014185-scrY-K16077	0	0	0	1
PGPT0014190	INDIRECT_EFFECTS	STRESS_CONTROL|BIOCONTROL	NEUTRALIZING_ABIOTIC_STRESS	NEUTRALIZING_SALINITY_STRESS	SALINITY_STRESS-SUCROSE_METABOLSIM# PGPT	PGPT0014190-scrA|sacP|sacX|ptsS-K02810	0	0	0	2
PGPT0014205	INDIRECT_EFFECTS	STRESS_CONTROL|BIOCONTROL	NEUTRALIZING_ABIOTIC_STRESS	NEUTRALIZING_SALINITY_STRESS	SALINITY_STRESS-SUCROSE_METABOLSIM	PGPT0014205-SPP_like-K07024	0	0	0	1
PGPT0014215	INDIRECT_EFFECTS	STRESS_CONTROL|BIOCONTROL	NEUTRALIZING_ABIOTIC_STRESS	NEUTRALIZING_SALINITY_STRESS	SALINITY_STRESS-PROLINE_METABOLISM	PGPT0014215-proA-K00147	1	1	1	1
PGPT0014220	INDIRECT_EFFECTS	STRESS_CONTROL|BIOCONTROL	NEUTRALIZING_ABIOTIC_STRESS	NEUTRALIZING_SALINITY_STRESS	SALINITY_STRESS-PROLINE_METABOLISM	PGPT0014220-proB-K00931	1	1	1	1
PGPT0014225	INDIRECT_EFFECTS	STRESS_CONTROL|BIOCONTROL	NEUTRALIZING_ABIOTIC_STRESS	NEUTRALIZING_SALINITY_STRESS	SALINITY_STRESS-PROLINE_METABOLISM# PGPT	PGPT0014225-proC-K00286	1	1	1	0
PGPT0014230	INDIRECT_EFFECTS	STRESS_CONTROL|BIOCONTROL	NEUTRALIZING_ABIOTIC_STRESS	NEUTRALIZING_SALINITY_STRESS	SALINITY_STRESS-PROLINE_METABOLISM# PGPT	PGPT0014230-proY-K11736	0	0	0	2
PGPT0014235	INDIRECT_EFFECTS	STRESS_CONTROL|BIOCONTROL	NEUTRALIZING_ABIOTIC_STRESS	NEUTRALIZING_SALINITY_STRESS	SALINITY_STRESS-PROLINE_METABOLISM# PGPT	PGPT0014235-lphA-K12658	0	0	1	0
PGPT0014241	INDIRECT_EFFECTS	STRESS_CONTROL|BIOCONTROL	NEUTRALIZING_ABIOTIC_STRESS	NEUTRALIZING_SALINITY_STRESS	SALINITY_STRESS-PROLINE_METABOLISM	PGPT0014241-argA-K00619	0	1	0	0
PGPT0014242	INDIRECT_EFFECTS	STRESS_CONTROL|BIOCONTROL	NEUTRALIZING_ABIOTIC_STRESS	NEUTRALIZING_SALINITY_STRESS	SALINITY_STRESS-PROLINE_METABOLISM	PGPT0014242-argHA-K14681	1	1	4	2
PGPT0014243	INDIRECT_EFFECTS	STRESS_CONTROL|BIOCONTROL	NEUTRALIZING_ABIOTIC_STRESS	NEUTRALIZING_SALINITY_STRESS	SALINITY_STRESS-PROLINE_METABOLISM	PGPT0014243-argAB-K14682	0	1	0	1
PGPT0014244	INDIRECT_EFFECTS	STRESS_CONTROL|BIOCONTROL	NEUTRALIZING_ABIOTIC_STRESS	NEUTRALIZING_SALINITY_STRESS	SALINITY_STRESS-PROLINE_METABOLISM	PGPT0014244-argJ-K00620	1	1	1	0
PGPT0014246	INDIRECT_EFFECTS	STRESS_CONTROL|BIOCONTROL	NEUTRALIZING_ABIOTIC_STRESS	NEUTRALIZING_SALINITY_STRESS	SALINITY_STRESS-PROLINE_METABOLISM	PGPT0014246-yobR-K22476	2	0	2	0
PGPT0014247	INDIRECT_EFFECTS	STRESS_CONTROL|BIOCONTROL	NEUTRALIZING_ABIOTIC_STRESS	NEUTRALIZING_SALINITY_STRESS	SALINITY_STRESS-PROLINE_METABOLISM	PGPT0014247-argO-K22477	0	1	0	0
PGPT0014249	INDIRECT_EFFECTS	STRESS_CONTROL|BIOCONTROL	NEUTRALIZING_ABIOTIC_STRESS	NEUTRALIZING_SALINITY_STRESS	SALINITY_STRESS-PROLINE_METABOLISM	PGPT0014249-argB-K00930	1	1	1	1
PGPT0014250	INDIRECT_EFFECTS	STRESS_CONTROL|BIOCONTROL	NEUTRALIZING_ABIOTIC_STRESS	NEUTRALIZING_SALINITY_STRESS	SALINITY_STRESS-PROLINE_METABOLISM# PGPT	PGPT0014250-ocd-K01750	0	0	1	0
PGPT0014251	INDIRECT_EFFECTS	STRESS_CONTROL|BIOCONTROL	NEUTRALIZING_ABIOTIC_STRESS	NEUTRALIZING_SALINITY_STRESS	SALINITY_STRESS-PROLINE_METABOLISM	PGPT0014251-argC-K00145	1	1	1	2
PGPT0014253	DIRECT_EFFECTS	BIO-FERTILIZATION	PHOSPHATE_SOLUBILIZATION	P-SOLUBILISATION-ORGANIC_ACID_METABOLISM	P-SOLUBILISATION-GLUCONIC_ACID-PQQ_PATHWAY# PGPT	PGPT0014253-argD|pqqI-K00821	1	2	1	3
PGPT0014254	INDIRECT_EFFECTS	STRESS_CONTROL|BIOCONTROL	NEUTRALIZING_ABIOTIC_STRESS	NEUTRALIZING_SALINITY_STRESS	SALINITY_STRESS-PROLINE_METABOLISM	PGPT0014254-argE-K01438	3	3	6	2
PGPT0014255	INDIRECT_EFFECTS	STRESS_CONTROL|BIOCONTROL	NEUTRALIZING_ABIOTIC_STRESS	NEUTRALIZING_SALINITY_STRESS	SALINITY_STRESS-PROLINE_METABOLISM# PGPT	PGPT0014255-lhpI_1-K19743	0	1	0	0
PGPT0014260	INDIRECT_EFFECTS	STRESS_CONTROL|BIOCONTROL	NEUTRALIZING_ABIOTIC_STRESS	NEUTRALIZING_SALINITY_STRESS	SALINITY_STRESS-PROLINE_METABOLISM# PGPT	PGPT0014260-lhpI_2-K19742	0	0	1	0
PGPT0014285	INDIRECT_EFFECTS	STRESS_CONTROL|BIOCONTROL	NEUTRALIZING_ABIOTIC_STRESS	NEUTRALIZING_SALINITY_STRESS	SALINITY_STRESS_SIGNALLING	PGPT0014285-degS-K07777	3	0	0	0
PGPT0014286	INDIRECT_EFFECTS	STRESS_CONTROL|BIOCONTROL	NEUTRALIZING_ABIOTIC_STRESS	NEUTRALIZING_SALINITY_STRESS	SALINITY_STRESS_SIGNALLING	PGPT0014286-degQ|hhoA-K04772	0	1	0	1
PGPT0014290	INDIRECT_EFFECTS	STRESS_CONTROL|BIOCONTROL	NEUTRALIZING_ABIOTIC_STRESS	NEUTRALIZING_SALINITY_STRESS	SALINITY_STRESS-HALOTOLERANCE_RELATED_ENZYMES	PGPT0014290-gdhB-K15371	1	1	1	0
PGPT0014291	INDIRECT_EFFECTS	STRESS_CONTROL|BIOCONTROL	NEUTRALIZING_ABIOTIC_STRESS	NEUTRALIZING_SALINITY_STRESS	SALINITY_STRESS-HALOTOLERANCE_RELATED_ENZYMES# PGPT	PGPT0014291-ycaD-K08219	0	0	1	1
PGPT0014295	INDIRECT_EFFECTS	STRESS_CONTROL|BIOCONTROL	NEUTRALIZING_ABIOTIC_STRESS	NEUTRALIZING_SALINITY_STRESS	SALINITY_STRESS-HALOTOLERANCE_RELATED_ENZYMES	PGPT0014295-atpC-K02114	1	1	1	1
PGPT0014296	INDIRECT_EFFECTS	STRESS_CONTROL|BIOCONTROL	NEUTRALIZING_ABIOTIC_STRESS	NEUTRALIZING_SALINITY_STRESS	SALINITY_STRESS-HALOTOLERANCE_RELATED_ENZYMES	PGPT0014296-atpD-K02112	2	1	2	2
PGPT0014297	INDIRECT_EFFECTS	STRESS_CONTROL|BIOCONTROL	NEUTRALIZING_ABIOTIC_STRESS	NEUTRALIZING_SALINITY_STRESS	SALINITY_STRESS-HALOTOLERANCE_RELATED_ENZYMES	PGPT0014297-atpG-K02115	1	1	1	1
PGPT0014298	INDIRECT_EFFECTS	STRESS_CONTROL|BIOCONTROL	NEUTRALIZING_ABIOTIC_STRESS	NEUTRALIZING_SALINITY_STRESS	SALINITY_STRESS-HALOTOLERANCE_RELATED_ENZYMES	PGPT0014298-atpA-K02111	1	1	1	1
PGPT0014299	INDIRECT_EFFECTS	STRESS_CONTROL|BIOCONTROL	NEUTRALIZING_ABIOTIC_STRESS	NEUTRALIZING_SALINITY_STRESS	SALINITY_STRESS-HALOTOLERANCE_RELATED_ENZYMES	PGPT0014299-atpH-K02113	1	2	1	1
PGPT0014300	INDIRECT_EFFECTS	STRESS_CONTROL|BIOCONTROL	NEUTRALIZING_ABIOTIC_STRESS	NEUTRALIZING_SALINITY_STRESS	SALINITY_STRESS-HALOTOLERANCE_RELATED_ENZYMES# PGPT	PGPT0014300-rfbC|rmlC-K01790	0	0	1	0
PGPT0014301	INDIRECT_EFFECTS	STRESS_CONTROL|BIOCONTROL	NEUTRALIZING_ABIOTIC_STRESS	NEUTRALIZING_SALINITY_STRESS	SALINITY_STRESS-HALOTOLERANCE_RELATED_ENZYMES	PGPT0014301-atpF-K02109	1	1	2	1
PGPT0014302	INDIRECT_EFFECTS	STRESS_CONTROL|BIOCONTROL	NEUTRALIZING_ABIOTIC_STRESS	NEUTRALIZING_SALINITY_STRESS	SALINITY_STRESS-HALOTOLERANCE_RELATED_ENZYMES	PGPT0014302-atpE-K02110	1	1	1	1
PGPT0014303	INDIRECT_EFFECTS	STRESS_CONTROL|BIOCONTROL	NEUTRALIZING_ABIOTIC_STRESS	NEUTRALIZING_SALINITY_STRESS	SALINITY_STRESS-HALOTOLERANCE_RELATED_ENZYMES	PGPT0014303-atpB-K02108	1	2	3	3
PGPT0014310	INDIRECT_EFFECTS	STRESS_CONTROL|BIOCONTROL	NEUTRALIZING_ABIOTIC_STRESS	NEUTRALIZING_SALINITY_STRESS	SALINITY_STRESS-HALOTOLERANCE_RELATED_ENZYMES# PGPT	PGPT0014310-spoT-K01139	1	1	1	1
PGPT0014315	INDIRECT_EFFECTS	STRESS_CONTROL|BIOCONTROL	NEUTRALIZING_ABIOTIC_STRESS	NEUTRALIZING_SALINITY_STRESS	SALINITY_STRESS-HALOTOLERANCE_RELATED_ENZYMES	PGPT0014315-lon-K01338	2	5	5	2
PGPT0014320	INDIRECT_EFFECTS	STRESS_CONTROL|BIOCONTROL	NEUTRALIZING_ABIOTIC_STRESS	NEUTRALIZING_SALINITY_STRESS	SALINITY_STRESS-HALOTOLERANCE_RELATED_ENZYMES# PGPT	PGPT0014320-mtnN|pfs|yadA-K01243	0	2	0	1
PGPT0014325	INDIRECT_EFFECTS	STRESS_CONTROL|BIOCONTROL	NEUTRALIZING_ABIOTIC_STRESS	NEUTRALIZING_SALINITY_STRESS	SALINITY_STRESS-HALOTOLERANCE_RELATED_ENZYMES	PGPT0014325-rpmEB-K02909	1	1	1	1
PGPT0014345	INDIRECT_EFFECTS	STRESS_CONTROL|BIOCONTROL	NEUTRALIZING_ABIOTIC_STRESS	NEUTRALIZING_SALINITY_STRESS	SALINITY_STRESS-HALOTOLERANCE_RELATED_ENZYMES# PGPT	PGPT0014345-prkA|yeaG-K07180	0	1	0	1
PGPT0014350	INDIRECT_EFFECTS	STRESS_CONTROL|BIOCONTROL	NEUTRALIZING_ABIOTIC_STRESS	NEUTRALIZING_SALINITY_STRESS	SALINITY_STRESS-HALOTOLERANCE_RELATED_ENZYMES# PGPT	PGPT0014350-rsbV-K04749	3	0	0	0
PGPT0014355	INDIRECT_EFFECTS	STRESS_CONTROL|BIOCONTROL	NEUTRALIZING_ABIOTIC_STRESS	NEUTRALIZING_SALINITY_STRESS	SALINITY_STRESS-HALOTOLERANCE_RELATED_ENZYMES# PGPT	PGPT0014355-smpB-K03664	1	1	1	1
PGPT0014360	INDIRECT_EFFECTS	STRESS_CONTROL|BIOCONTROL	NEUTRALIZING_ABIOTIC_STRESS	NEUTRALIZING_SALINITY_STRESS	SALINITY_STRESS-HALOTOLERANCE_RELATED_ENZYMES# PGPT	PGPT0014360-tatB-K03117	1	1	1	1
PGPT0014365	INDIRECT_EFFECTS	STRESS_CONTROL|BIOCONTROL	NEUTRALIZING_ABIOTIC_STRESS	NEUTRALIZING_SALINITY_STRESS	SALINITY_STRESS-HALOTOLERANCE_RELATED_ENZYMES# PGPT	PGPT0014365-acrR1-K18136	0	1	0	1
PGPT0014370	INDIRECT_EFFECTS	STRESS_CONTROL|BIOCONTROL	NEUTRALIZING_ABIOTIC_STRESS	NEUTRALIZING_SALINITY_STRESS	SALINITY_STRESS-HALOTOLERANCE_RELATED_ENZYMES# PGPT	PGPT0014370-ablA-K01843	0	0	1	0
PGPT0014375	INDIRECT_EFFECTS	STRESS_CONTROL|BIOCONTROL	NEUTRALIZING_ABIOTIC_STRESS	NEUTRALIZING_SALINITY_STRESS	SALINITY_STRESS-HALOTOLERANCE_RELATED_ENZYMES	PGPT0014375-ydiY-K07283	0	0	0	1
PGPT0014380	INDIRECT_EFFECTS	STRESS_CONTROL|BIOCONTROL	NEUTRALIZING_ABIOTIC_STRESS	NITROSATIVE|OXIDATIVE_STRESS|ROS_SCAVENGING	OXIDATIVE_STRESS-OXIDOREDUCTASES	PGPT0014380-katE|CAT|catB|srpA-K03781	2	3	1	1
PGPT0014385	INDIRECT_EFFECTS	STRESS_CONTROL|BIOCONTROL	NEUTRALIZING_ABIOTIC_STRESS	NEUTRALIZING_SALINITY_STRESS	SALINITY_STRESS-CATION_TRANSPORT# PGPT	PGPT0014385-TC_LIVCS|brnQ-K03311	0	0	0	1
PGPT0014395	INDIRECT_EFFECTS	STRESS_CONTROL|BIOCONTROL	NEUTRALIZING_ABIOTIC_STRESS	NEUTRALIZING_SALINITY_STRESS	SALINITY_STRESS-CATION_TRANSPORT# PGPT	PGPT0014395-ybaL|TC_KEF-K03455	0	3	2	1
PGPT0014405	INDIRECT_EFFECTS	STRESS_CONTROL|BIOCONTROL	NEUTRALIZING_ABIOTIC_STRESS	NEUTRALIZING_SALINITY_STRESS	SALINITY_STRESS-CATION_TRANSPORT# PGPT	PGPT0014405-yflA|TC_AGCS-K03310	0	0	0	1
PGPT0014410	INDIRECT_EFFECTS	STRESS_CONTROL|BIOCONTROL	NEUTRALIZING_ABIOTIC_STRESS	NEUTRALIZING_SALINITY_STRESS	SALINITY_STRESS-CATION_TRANSPORT# PGPT	PGPT0014410-TC_GPH|yihO|xynP-K03292	2	0	0	11
PGPT0014425	INDIRECT_EFFECTS	STRESS_CONTROL|BIOCONTROL	NEUTRALIZING_ABIOTIC_STRESS	NEUTRALIZING_SALINITY_STRESS	SALINITY_STRESS-H+_SYMPORTER	PGPT0014425-ydfJ-K08173	0	0	0	1
PGPT0014435	INDIRECT_EFFECTS	STRESS_CONTROL|BIOCONTROL	NEUTRALIZING_ABIOTIC_STRESS	NEUTRALIZING_SALINITY_STRESS	SALINITY_STRESS-H+_SYMPORTER	PGPT0014435-ydjE-K08369	1	3	2	0
PGPT0014445	INDIRECT_EFFECTS	STRESS_CONTROL|BIOCONTROL	NEUTRALIZING_ABIOTIC_STRESS	NEUTRALIZING_SALINITY_STRESS	SALINITY_STRESS-H+_SYMPORTER# PGPT	PGPT0014445-galP-K08137	0	0	0	1
PGPT0014455	INDIRECT_EFFECTS	STRESS_CONTROL|BIOCONTROL	NEUTRALIZING_ABIOTIC_STRESS	NEUTRALIZING_ACIDIC_STRESS	ACIDIC_STRESS-LOW_ACID_SIGNALLUING	PGPT0014455-chvI-K14981	0	0	1	0
PGPT0014465	INDIRECT_EFFECTS	STRESS_CONTROL|BIOCONTROL	NEUTRALIZING_ABIOTIC_STRESS	NEUTRALIZING_ACIDIC_STRESS	ACIDIC_STRESS-ORNITHINE_LIPIDS_BIOSYNTHESIS# PGPT	PGPT0014465-olsA-K22617	0	0	1	0
PGPT0014470	INDIRECT_EFFECTS	STRESS_CONTROL|BIOCONTROL	NEUTRALIZING_ABIOTIC_STRESS	NEUTRALIZING_ACIDIC_STRESS	ACIDIC_STRESS-ORNITHINE_LIPIDS_BIOSYNTHESIS# PGPT	PGPT0014470-olsB-K22310	0	1	1	1
PGPT0014475	INDIRECT_EFFECTS	STRESS_CONTROL|BIOCONTROL	NEUTRALIZING_ABIOTIC_STRESS	NEUTRALIZING_ACIDIC_STRESS	ACIDIC_STRESS-ORNITHINE_LIPIDS_BIOSYNTHESIS# PGPT	PGPT0014475-olsC-K22616	0	0	1	0
PGPT0014485	INDIRECT_EFFECTS	STRESS_CONTROL|BIOCONTROL	NEUTRALIZING_ABIOTIC_STRESS	NEUTRALIZING_ACIDIC_STRESS	ACIDIC_STRESS-EVG-EMR_System# PGPT	PGPT0014485-evgS|bvgS-K07679	0	1	1	0
PGPT0014490	INDIRECT_EFFECTS	STRESS_CONTROL|BIOCONTROL	NEUTRALIZING_ABIOTIC_STRESS	NEUTRALIZING_ACIDIC_STRESS	ACIDIC_STRESS-EVG-EMR_System# PGPT	PGPT0014490-evgA|bvgA-K07690	0	1	0	0
PGPT0014500	INDIRECT_EFFECTS	STRESS_CONTROL|BIOCONTROL	NEUTRALIZING_ABIOTIC_STRESS	NEUTRALIZING_ACIDIC_STRESS	ACIDIC_STRESS-QUORUM_SENSING_MEDIATED_TOLERANCE# PGPT	PGPT0014500-gadC-K20265	0	0	0	1
PGPT0014505	INDIRECT_EFFECTS	STRESS_CONTROL|BIOCONTROL	NEUTRALIZING_ABIOTIC_STRESS	NEUTRALIZING_ACIDIC_STRESS	ACIDIC_STRESS-SOXALATE-INDUCED_ACID_TOLERANCE# PGPT	PGPT0014505-uctC|yfdE-K18702	2	7	1	0
PGPT0014520	INDIRECT_EFFECTS	STRESS_CONTROL|BIOCONTROL	NEUTRALIZING_ABIOTIC_STRESS	NEUTRALIZING_HERBICIDIAL_STRESS	HERBICIDIAL_STRESS-PARAQUAT_STRESS_REDUCTION	PGPT0014520-pqiB-K06192	0	4	0	1
PGPT0014521	INDIRECT_EFFECTS	STRESS_CONTROL|BIOCONTROL	NEUTRALIZING_ABIOTIC_STRESS	NEUTRALIZING_HERBICIDIAL_STRESS	HERBICIDIAL_STRESS-PARAQUAT_STRESS_REDUCTION	PGPT0014521-yerD-NA	0	1	0	0
PGPT0014525	INDIRECT_EFFECTS	STRESS_CONTROL|BIOCONTROL	NEUTRALIZING_ABIOTIC_STRESS	NEUTRALIZING_HERBICIDIAL_STRESS	HERBICIDIAL_STRESS-PARAQUAT_STRESS_REDUCTION# PGPT	PGPT0014525-yfkH-K07058	4	4	1	1
PGPT0014530	INDIRECT_EFFECTS	STRESS_CONTROL|BIOCONTROL	NEUTRALIZING_ABIOTIC_STRESS	NEUTRALIZING_HERBICIDIAL_STRESS	HERBICIDIAL_STRESS-PARAQUAT_STRESS_REDUCTION# PGPT	PGPT0014530-yfkJ|wzb-K01104	2	1	1	1
PGPT0014540	INDIRECT_EFFECTS	STRESS_CONTROL|BIOCONTROL	UNIVERSAL_STRESS_RESPONSE	STRESS_SIGNALLING_PROTEINS	OTHER_STRESS_RESPONSE_PROTEINS# PGPT	PGPT0014540-csbB|gtrB|yfdH-K20534	0	0	1	0
PGPT0014545	INDIRECT_EFFECTS	STRESS_CONTROL|BIOCONTROL	NEUTRALIZING_ABIOTIC_STRESS	HIGH_TEMPERATURE_TOLERANCE	HEAT_SHOCK_PRTOEINS	PGPT0014545-dnaJ-K03686	2	1	3	1
PGPT0014550	INDIRECT_EFFECTS	STRESS_CONTROL|BIOCONTROL	NEUTRALIZING_ABIOTIC_STRESS	HIGH_TEMPERATURE_TOLERANCE	HEAT_SHOCK_PRTOEINS	PGPT0014550-djlA-K05801	0	0	1	1
PGPT0014555	INDIRECT_EFFECTS	STRESS_CONTROL|BIOCONTROL	NEUTRALIZING_ABIOTIC_STRESS	HIGH_TEMPERATURE_TOLERANCE	HEAT_SHOCK_PRTOEINS	PGPT0014555-dnaK-K04043	1	3	3	6
PGPT0014560	INDIRECT_EFFECTS	STRESS_CONTROL|BIOCONTROL	NEUTRALIZING_ABIOTIC_STRESS	HIGH_TEMPERATURE_TOLERANCE	HEAT_SHOCK_PRTOEINS# PGPT	PGPT0014560-dks-K06204	1	1	1	1
PGPT0014565	INDIRECT_EFFECTS	STRESS_CONTROL|BIOCONTROL	NEUTRALIZING_ABIOTIC_STRESS	HIGH_TEMPERATURE_TOLERANCE	HEAT_SHOCK_PRTOEINS	PGPT0014565-groES|mopB-K04078	2	1	2	0
PGPT0014570	INDIRECT_EFFECTS	STRESS_CONTROL|BIOCONTROL	NEUTRALIZING_ABIOTIC_STRESS	HIGH_TEMPERATURE_TOLERANCE	HEAT_SHOCK_PRTOEINS# PGPT	PGPT0014570-groEL|mopA-K04077	4	1	3	2
PGPT0014575	INDIRECT_EFFECTS	STRESS_CONTROL|BIOCONTROL	NEUTRALIZING_ABIOTIC_STRESS	HIGH_TEMPERATURE_TOLERANCE	HEAT_SHOCK_PRTOEINS	PGPT0014575-clpA-K03694	1	2	2	3
PGPT0014580	INDIRECT_EFFECTS	STRESS_CONTROL|BIOCONTROL	NEUTRALIZING_ABIOTIC_STRESS	HIGH_TEMPERATURE_TOLERANCE	HEAT_SHOCK_PRTOEINS	PGPT0014580-clpB-K03695	2	1	4	3
PGPT0014585	INDIRECT_EFFECTS	STRESS_CONTROL|BIOCONTROL	NEUTRALIZING_ABIOTIC_STRESS	HIGH_TEMPERATURE_TOLERANCE	HEAT_SHOCK_PRTOEINS	PGPT0014585-clpC-K03696	4	0	0	0
PGPT0014595	INDIRECT_EFFECTS	STRESS_CONTROL|BIOCONTROL	NEUTRALIZING_ABIOTIC_STRESS	HIGH_TEMPERATURE_TOLERANCE	HEAT_SHOCK_PRTOEINS	PGPT0014595-clpP-K01358	4	1	1	2
PGPT0014600	INDIRECT_EFFECTS	STRESS_CONTROL|BIOCONTROL	NEUTRALIZING_ABIOTIC_STRESS	HIGH_TEMPERATURE_TOLERANCE	HEAT_SHOCK_PRTOEINS# PGPT	PGPT0014600-clpX-K03544	1	2	2	3
PGPT0014605	INDIRECT_EFFECTS	STRESS_CONTROL|BIOCONTROL	NEUTRALIZING_ABIOTIC_STRESS	HIGH_TEMPERATURE_TOLERANCE	HEAT_SHOCK_PRTOEINS	PGPT0014605-htpX|ykrL-K03799	3	4	2	2
PGPT0014615	INDIRECT_EFFECTS	STRESS_CONTROL|BIOCONTROL	NEUTRALIZING_ABIOTIC_STRESS	HIGH_TEMPERATURE_TOLERANCE	HEAT_SHOCK_PRTOEINS	PGPT0014615-hslJ-K03668	0	0	1	0
PGPT0014620	INDIRECT_EFFECTS	STRESS_CONTROL|BIOCONTROL	NEUTRALIZING_ABIOTIC_STRESS	HIGH_TEMPERATURE_TOLERANCE	HEAT_SHOCK_PRTOEINS	PGPT0014620-hslR|yrfH-K04762	0	1	1	1
PGPT0014625	INDIRECT_EFFECTS	STRESS_CONTROL|BIOCONTROL	NEUTRALIZING_ABIOTIC_STRESS	HIGH_TEMPERATURE_TOLERANCE	HEAT_SHOCK_PRTOEINS	PGPT0014625-hspR-K13640	1	0	0	0
PGPT0014630	INDIRECT_EFFECTS	STRESS_CONTROL|BIOCONTROL	NEUTRALIZING_ABIOTIC_STRESS	HIGH_TEMPERATURE_TOLERANCE	HEAT_SHOCK_PRTOEINS	PGPT0014630-ibpB-K04081	0	0	0	1
PGPT0014640	INDIRECT_EFFECTS	STRESS_CONTROL|BIOCONTROL	NEUTRALIZING_ABIOTIC_STRESS	HIGH_TEMPERATURE_TOLERANCE	HEAT_SHOCK_PRTOEINS# PGPT	PGPT0014640-hptG-K04079	0	1	1	2
PGPT0014641	INDIRECT_EFFECTS	STRESS_CONTROL|BIOCONTROL	NEUTRALIZING_ABIOTIC_STRESS	HIGH_TEMPERATURE_TOLERANCE	HEAT_SHOCK_PRTOEINS	PGPT0014641-ibpA-K04080	0	0	2	1
PGPT0014644	INDIRECT_EFFECTS	STRESS_CONTROL|BIOCONTROL	NEUTRALIZING_ABIOTIC_STRESS	HIGH_TEMPERATURE_TOLERANCE	HEAT_SHOCK_PRTOEINS	PGPT0014644-hspQ|yccV-K11940	0	0	1	0
PGPT0014645	INDIRECT_EFFECTS	STRESS_CONTROL|BIOCONTROL	NEUTRALIZING_ABIOTIC_STRESS	HIGH_TEMPERATURE_TOLERANCE	HEAT_SHOCK_PRTOEINS	PGPT0014645-hsp33|hslO-K04083	0	1	1	1
PGPT0014646	INDIRECT_EFFECTS	STRESS_CONTROL|BIOCONTROL	NEUTRALIZING_ABIOTIC_STRESS	NEUTRALIZING_OSMOTIC_STRESS	OSMOTIC_STRESS_SIGNALLUING# PGPT	PGPT0014646-pspA-K03969	1	0	0	0
PGPT0014648	INDIRECT_EFFECTS	STRESS_CONTROL|BIOCONTROL	NEUTRALIZING_ABIOTIC_STRESS	NEUTRALIZING_OSMOTIC_STRESS	OSMOTIC_STRESS_SIGNALLUING# PGPT	PGPT0014648-pspE-K03972	0	2	1	0
PGPT0014650	INDIRECT_EFFECTS	STRESS_CONTROL|BIOCONTROL	NEUTRALIZING_ABIOTIC_STRESS	HIGH_TEMPERATURE_TOLERANCE	HIGH_TEMPERATUR_REGULATION	PGPT0014650-grpE-K03687	1	1	1	1
PGPT0014658	INDIRECT_EFFECTS	STRESS_CONTROL|BIOCONTROL	UNIVERSAL_STRESS_RESPONSE	STRESS_SIGNALLING_PROTEINS	STRESS_SIGNAL-TRANSCRIPTIONAL_REGULATION	PGPT0014658-ypdC-NA	1	1	0	1
PGPT0014665	INDIRECT_EFFECTS	STRESS_CONTROL|BIOCONTROL	NEUTRALIZING_ABIOTIC_STRESS	HIGH_TEMPERATURE_TOLERANCE	HEAT_AFFECTED_LIPOPOLYSACCHARIDE_ASSEMBLY	PGPT0014665-lapA-K08992	1	1	1	0
PGPT0014670	INDIRECT_EFFECTS	STRESS_CONTROL|BIOCONTROL	NEUTRALIZING_ABIOTIC_STRESS	HIGH_TEMPERATURE_TOLERANCE	HEAT_AFFECTED_LIPOPOLYSACCHARIDE_ASSEMBLY	PGPT0014670-lapB-K19804	0	1	0	0
PGPT0014675	INDIRECT_EFFECTS	STRESS_CONTROL|BIOCONTROL	NEUTRALIZING_ABIOTIC_STRESS	LOW_TEMPERATURE_TOLERANCE	COLD_SHOCK_PROTEINS	PGPT0014675-cspA-K03704	2	3	4	2
PGPT0014685	INDIRECT_EFFECTS	STRESS_CONTROL|BIOCONTROL	NEUTRALIZING_ABIOTIC_STRESS	NITROSATIVE|OXIDATIVE_STRESS|ROS_SCAVENGING	OXIDATIVE_STRESS-OXIDATIVE_STRESS_RELATED_PROTEIN# PGPT	PGPT0014685-rpoS-K03087	3	3	2	4
PGPT0014705	INDIRECT_EFFECTS	STRESS_CONTROL|BIOCONTROL	NEUTRALIZING_ABIOTIC_STRESS	LOW_TEMPERATURE_TOLERANCE	LOW_TEMPERATURE-RELATED_ENZYMES# PGPT	PGPT0014705-gdh|ycdF-K00034	1	1	0	0
PGPT0014710	INDIRECT_EFFECTS	STRESS_CONTROL|BIOCONTROL	NEUTRALIZING_ABIOTIC_STRESS	LOW_TEMPERATURE_TOLERANCE	LOW_TEMPERATURE-RELATED_ENZYMES# PGPT	PGPT0014710-ydaE-K09988	0	0	0	2
PGPT0014715	INDIRECT_EFFECTS	STRESS_CONTROL|BIOCONTROL	NEUTRALIZING_ABIOTIC_STRESS	LOW_TEMPERATURE_TOLERANCE	LOW_TEMPERATURE-RELATED_ENZYMES# PGPT	PGPT0014715-yfhD-K18691	0	0	0	1
PGPT0014730	INDIRECT_EFFECTS	STRESS_CONTROL|BIOCONTROL	NEUTRALIZING_ABIOTIC_STRESS	LOW_TEMPERATURE_TOLERANCE	LOW_TEMPERATURE-RELATED_ENZYMES	PGPT0014730-yfhF-K07071	1	0	1	0
PGPT0014735	INDIRECT_EFFECTS	STRESS_CONTROL|BIOCONTROL	UNIVERSAL_STRESS_RESPONSE	STRESS_SIGNALLING_PROTEINS	STRESS_SIGNAL-POLYHYDROXYBUTYRATE_PRODUCTION# PGPT	PGPT0014735-phbB|phaB-K00023	0	1	1	0
PGPT0014740	INDIRECT_EFFECTS	STRESS_CONTROL|BIOCONTROL	UNIVERSAL_STRESS_RESPONSE	STRESS_SIGNALLING_PROTEINS	STRESS_SIGNAL-POLYHYDROXYBUTYRATE_PRODUCTION# PGPT	PGPT0014740-phbC|phaC-K03821	1	1	2	0
PGPT0014741	INDIRECT_EFFECTS	STRESS_CONTROL|BIOCONTROL	UNIVERSAL_STRESS_RESPONSE	STRESS_SIGNALLING_PROTEINS	STRESS_SIGNAL-POLYHYDROXYBUTYRATE_PRODUCTION# PGPT	PGPT0014741-phaJ|croR-K17865	1	3	1	0
PGPT0014755	INDIRECT_EFFECTS	STRESS_CONTROL|BIOCONTROL	UNIVERSAL_STRESS_RESPONSE	STRESS_SIGNALLING_PROTEINS	STRESS_SIGNAL-SPORULATION_SIGNALLING# PGPT	PGPT0014755-sinR-K19449	1	1	1	1
PGPT0014760	INDIRECT_EFFECTS	STRESS_CONTROL|BIOCONTROL	UNIVERSAL_STRESS_RESPONSE	STRESS_SIGNALLING_PROTEINS	STRESS_SIGNAL-SPORULATION_SIGNALLING# PGPT	PGPT0014760-paiB|yumE-K07734	0	1	1	0
PGPT0014762	INDIRECT_EFFECTS	COLONIZING_PLANT_SYSTEM	COLONIZATION-PLANT_DERIVED_SUBSTRATE_USAGE	PLANT_DERIVED_GLYCOSIDE_UTILIZATION	PLANT_DERIVED_GLYCOSIDE_USAGE_REGULATION	PGPT0014762-ascG-K03487	0	0	0	1
PGPT0014763	INDIRECT_EFFECTS	COMPETITIVE_EXCLUSION|CE	CE-CELL_ENVELOPE_REMODELLING	CE-ENVELOPE_REMODELLING_REGULATION	CE-ENVELOPE_REMODELLING_REGULATION_FACTOR	PGPT0014763-walR-NA	1	1	1	2
PGPT0014770	INDIRECT_EFFECTS	STRESS_CONTROL|BIOCONTROL	UNIVERSAL_STRESS_RESPONSE	STRESS_SIGNALLING_PROTEINS	STRESS_SIGNAL-SPORULATION_SIGNALLING	PGPT0014770-disA-K07067	2	0	1	0
PGPT0014791	INDIRECT_EFFECTS	COLONIZING_PLANT_SYSTEM	ROOT_COLONIZATION	ROOT_COLONIZATION_FACILITATING_PROTEIN	SESSILE_ROOT_COLONIZATION	PGPT0014791-ccpA-NA	0	0	0	5
PGPT0014800	INDIRECT_EFFECTS	STRESS_CONTROL|BIOCONTROL	UNIVERSAL_STRESS_RESPONSE	STRESS_SIGNALLING_PROTEINS	STRESS_SIGNAL-CELL_GROWTH_SIGNALLING# PGPT	PGPT0014800-dnaA-K02313	1	3	1	1
PGPT0014810	INDIRECT_EFFECTS	STRESS_CONTROL|BIOCONTROL	UNIVERSAL_STRESS_RESPONSE	STRESS_SIGNALLING_PROTEINS	STRESS_SIGNAL-CELL_GROWTH_SIGNALLING	PGPT0014810-ftsW|spoVE-K03588	3	1	1	1
PGPT0014815	INDIRECT_EFFECTS	STRESS_CONTROL|BIOCONTROL	UNIVERSAL_STRESS_RESPONSE	STRESS_SIGNALLING_PROTEINS	STRESS_SIGNAL-CELL_GROWTH_SIGNALLING	PGPT0014815-parB|spo0J|yyaA-K03497	3	3	1	0
PGPT0014820	INDIRECT_EFFECTS	STRESS_CONTROL|BIOCONTROL	UNIVERSAL_STRESS_RESPONSE	STRESS_SIGNALLING_PROTEINS	STRESS_SIGNAL-STRINGENT_STRESS_RESPONSE# PGPT	PGPT0014820-relA-K00951	0	1	0	1
PGPT0014830	INDIRECT_EFFECTS	STRESS_CONTROL|BIOCONTROL	UNIVERSAL_STRESS_RESPONSE	STRESS_SIGNALLING_PROTEINS	STRESS_SIGNAL-STRINGENT_STRESS_RESPONSE	PGPT0014830-ydeB|carD-K07736	1	0	1	0
PGPT0014835	INDIRECT_EFFECTS	STRESS_CONTROL|BIOCONTROL	UNIVERSAL_STRESS_RESPONSE	STRESS_SIGNALLING_PROTEINS	STRESS_SIGNAL-STRINGENT_STRESS_RESPONSE	PGPT0014835-uspB-K06144	0	0	0	1
PGPT0014840	INDIRECT_EFFECTS	STRESS_CONTROL|BIOCONTROL	UNIVERSAL_STRESS_RESPONSE	STRESS_SIGNALLING_PROTEINS	STRESS_SIGNAL-ENVELOPE_STRESS_RESPONSE# PGPT	PGPT0014840-rcsA-K07781	0	0	0	1
PGPT0014845	INDIRECT_EFFECTS	STRESS_CONTROL|BIOCONTROL	UNIVERSAL_STRESS_RESPONSE	STRESS_SIGNALLING_PROTEINS	STRESS_SIGNAL-ENVELOPE_STRESS_RESPONSE# PGPT	PGPT0014845-rcsB-K07687	0	1	0	1
PGPT0014850	INDIRECT_EFFECTS	STRESS_CONTROL|BIOCONTROL	UNIVERSAL_STRESS_RESPONSE	STRESS_SIGNALLING_PROTEINS	STRESS_SIGNAL-ENVELOPE_STRESS_RESPONSE# PGPT	PGPT0014850-rcsC-K07677	0	0	0	3
PGPT0014855	INDIRECT_EFFECTS	STRESS_CONTROL|BIOCONTROL	UNIVERSAL_STRESS_RESPONSE	STRESS_SIGNALLING_PROTEINS	STRESS_SIGNAL-ENVELOPE_STRESS_RESPONSE# PGPT	PGPT0014855-rcsD-K07676	0	0	0	1
PGPT0014870	INDIRECT_EFFECTS	STRESS_CONTROL|BIOCONTROL	UNIVERSAL_STRESS_RESPONSE	STRESS_SIGNALLING_PROTEINS	STRESS_SIGNAL-ENVELOPE_STRESS_RESPONSE# PGPT	PGPT0014870-liaR-K11618	5	0	0	0
PGPT0014875	INDIRECT_EFFECTS	STRESS_CONTROL|BIOCONTROL	UNIVERSAL_STRESS_RESPONSE	STRESS_SIGNALLING_PROTEINS	STRESS_SIGNAL-ENVELOPE_STRESS_RESPONSE# PGPT	PGPT0014875-gtaB|UGP2|galU|galF-K00963	2	2	1	3
PGPT0014881	INDIRECT_EFFECTS	STRESS_CONTROL|BIOCONTROL	UNIVERSAL_STRESS_RESPONSE	STRESS_SIGNALLING_PROTEINS	STRESS_SIGNAL-DNA_DAMAGE_DEFENSE|REPAIR# PGPT	PGPT0014881-dinB-K02346	5	1	2	2
PGPT0014885	INDIRECT_EFFECTS	STRESS_CONTROL|BIOCONTROL	UNIVERSAL_STRESS_RESPONSE	STRESS_SIGNALLING_PROTEINS	STRESS_SIGNAL-DNA_DAMAGE_DEFENSE|REPAIR	PGPT0014885-yxlJ|aag-K03652	1	0	0	0
PGPT0014890	INDIRECT_EFFECTS	STRESS_CONTROL|BIOCONTROL	UNIVERSAL_STRESS_RESPONSE	STRESS_SIGNALLING_PROTEINS	STRESS_SIGNAL-DNA_DAMAGE_DEFENSE|REPAIR	PGPT0014890-yugI-K07570	0	2	0	2
PGPT0014895	INDIRECT_EFFECTS	STRESS_CONTROL|BIOCONTROL	UNIVERSAL_STRESS_RESPONSE	STRESS_SIGNALLING_PROTEINS	STRESS_SIGNAL-DNA_DAMAGE_DEFENSE|REPAIR	PGPT0014895-lexA-K01356	1	1	2	0
PGPT0014905	INDIRECT_EFFECTS	STRESS_CONTROL|BIOCONTROL	UNIVERSAL_STRESS_RESPONSE	STRESS_SIGNALLING_PROTEINS	STRESS_SIGNAL-DNA_DAMAGE_DEFENSE|REPAIR	PGPT0014905-radA-K04485	2	1	2	2
PGPT0014910	INDIRECT_EFFECTS	STRESS_CONTROL|BIOCONTROL	UNIVERSAL_STRESS_RESPONSE	STRESS_SIGNALLING_PROTEINS	STRESS_SIGNAL-DNA_DAMAGE_DEFENSE|REPAIR	PGPT0014910-ligD-K01971	8	5	5	0
PGPT0014915	INDIRECT_EFFECTS	STRESS_CONTROL|BIOCONTROL	UNIVERSAL_STRESS_RESPONSE	STRESS_SIGNALLING_PROTEINS	STRESS_SIGNAL-DNA_DAMAGE_DEFENSE|REPAIR	PGPT0014915-uvrA-K03701	2	3	1	2
PGPT0014920	INDIRECT_EFFECTS	STRESS_CONTROL|BIOCONTROL	UNIVERSAL_STRESS_RESPONSE	STRESS_SIGNALLING_PROTEINS	STRESS_SIGNAL-DNA_DAMAGE_DEFENSE|REPAIR	PGPT0014920-uvrB-K03702	2	2	2	2
PGPT0014925	INDIRECT_EFFECTS	STRESS_CONTROL|BIOCONTROL	UNIVERSAL_STRESS_RESPONSE	STRESS_SIGNALLING_PROTEINS	STRESS_SIGNAL-DNA_DAMAGE_DEFENSE|REPAIR	PGPT0014925-uvrC-K03703	2	1	1	1
PGPT0014930	INDIRECT_EFFECTS	STRESS_CONTROL|BIOCONTROL	UNIVERSAL_STRESS_RESPONSE	STRESS_SIGNALLING_PROTEINS	STRESS_SIGNAL-TRANSCRIPTIONAL_REGULATION	PGPT0014930-bolA-K05527	0	1	1	2
PGPT0014935	INDIRECT_EFFECTS	STRESS_CONTROL|BIOCONTROL	UNIVERSAL_STRESS_RESPONSE	STRESS_SIGNALLING_PROTEINS	STRESS_SIGNAL-TRANSCRIPTIONAL_REGULATION# PGPT	PGPT0014935-rcdA-K23778	0	1	0	0
PGPT0014945	INDIRECT_EFFECTS	STRESS_CONTROL|BIOCONTROL	UNIVERSAL_STRESS_RESPONSE	STRESS_SIGNALLING_PROTEINS	STRESS_SIGNAL-TRANSCRIPTIONAL_REGULATION	PGPT0014945-rsbRD|yqhA-K17763	0	3	0	0
PGPT0014950	INDIRECT_EFFECTS	STRESS_CONTROL|BIOCONTROL	UNIVERSAL_STRESS_RESPONSE	STRESS_SIGNALLING_PROTEINS	STRESS_SIGNAL-TRANSCRIPTIONAL_REGULATION	PGPT0014950-rsbW-K04757	3	0	0	0
PGPT0014955	INDIRECT_EFFECTS	STRESS_CONTROL|BIOCONTROL	UNIVERSAL_STRESS_RESPONSE	STRESS_SIGNALLING_PROTEINS	STRESS_SIGNAL-TRANSCRIPTIONAL_REGULATION	PGPT0014955-rsbX-K05518	0	1	0	0
PGPT0014960	INDIRECT_EFFECTS	STRESS_CONTROL|BIOCONTROL	UNIVERSAL_STRESS_RESPONSE	STRESS_SIGNALLING_PROTEINS	STRESS_SIGNAL-TRANSCRIPTIONAL_REGULATION# PGPT	PGPT0014960-rpoE|sigW-K03088	19	5	6	2
PGPT0014965	INDIRECT_EFFECTS	STRESS_CONTROL|BIOCONTROL	UNIVERSAL_STRESS_RESPONSE	STRESS_SIGNALLING_PROTEINS	OTHER_STRESS_RESPONSE_PROTEINS# PGPT	PGPT0014965-pyrF-K01591	0	1	1	0
PGPT0014970	INDIRECT_EFFECTS	STRESS_CONTROL|BIOCONTROL	UNIVERSAL_STRESS_RESPONSE	STRESS_SIGNALLING_PROTEINS	OTHER_STRESS_RESPONSE_PROTEINS	PGPT0014970-uspA-K06149	0	0	0	2
PGPT0014975	INDIRECT_EFFECTS	STRESS_CONTROL|BIOCONTROL	UNIVERSAL_STRESS_RESPONSE	STRESS_SIGNALLING_PROTEINS	OTHER_STRESS_RESPONSE_PROTEINS# PGPT	PGPT0014975-ykgB|pgl-K07404	0	1	0	2
PGPT0014976	INDIRECT_EFFECTS	STRESS_CONTROL|BIOCONTROL	NEUTRALIZING_ABIOTIC_STRESS	NEUTRALIZING_SALINITY_STRESS	SALINITY_STRESS-HALOTOLERANCE_RELATED_ENZYMES	PGPT0014976-rseA-K03597	0	1	0	1
PGPT0014978	INDIRECT_EFFECTS	STRESS_CONTROL|BIOCONTROL	NEUTRALIZING_ABIOTIC_STRESS	NEUTRALIZING_SALINITY_STRESS	SALINITY_STRESS-HALOTOLERANCE_RELATED_ENZYMES	PGPT0014978-surA-K03771	0	1	0	1
PGPT0014995	INDIRECT_EFFECTS	STRESS_CONTROL|BIOCONTROL	UNIVERSAL_STRESS_RESPONSE	STRESS_SIGNALLING_PROTEINS	OTHER_STRESS_RESPONSE_PROTEINS	PGPT0014995-uspE-K14055	0	0	0	1
PGPT0015000	INDIRECT_EFFECTS	STRESS_CONTROL|BIOCONTROL	UNIVERSAL_STRESS_RESPONSE	STRESS_SIGNALLING_PROTEINS	OTHER_STRESS_RESPONSE_PROTEINS	PGPT0015000-uspF-K14061	0	0	1	0
PGPT0015005	DIRECT_EFFECTS	BIO-REMEDIATION	HEAVY_METAL_DETOXIFICATION	HEAVY_METAL_COPPER_RESISTANCE	COPPER_RESISTANCE_MEDIATION# PGPT	PGPT0015005-comC|ycfR|bhsA-K12151	0	0	0	2
PGPT0015010	INDIRECT_EFFECTS	STRESS_CONTROL|BIOCONTROL	UNIVERSAL_STRESS_RESPONSE	STRESS_SIGNALLING_PROTEINS	OTHER_STRESS_RESPONSE_PROTEINS# PGPT	PGPT0015010-yfkM|pfpI|yraA-K05520	1	1	1	1
PGPT0015015	INDIRECT_EFFECTS	STRESS_CONTROL|BIOCONTROL	UNIVERSAL_STRESS_RESPONSE	STRESS_SIGNALLING_PROTEINS	OTHER_STRESS_RESPONSE_PROTEINS	PGPT0015015-yfhM-K22369	0	1	0	0
PGPT0015021	INDIRECT_EFFECTS	STRESS_CONTROL|BIOCONTROL	NEUTRALIZING_ABIOTIC_STRESS	NEUTRALIZING_HERBICIDIAL_STRESS	HERBICIDIAL_STRESS-PARAQUAT_STRESS_REDUCTION# PGPT	PGPT0015021-yugU-NA	0	0	0	1
PGPT0015023	INDIRECT_EFFECTS	STRESS_CONTROL|BIOCONTROL	NEUTRALIZING_ABIOTIC_STRESS	NEUTRALIZING_HERBICIDIAL_STRESS	HERBICIDIAL_STRESS-PARAQUAT_STRESS_REDUCTION# PGPT	PGPT0015023-csbC-NA	0	1	0	0
PGPT0015025	INDIRECT_EFFECTS	STRESS_CONTROL|BIOCONTROL	UNIVERSAL_STRESS_RESPONSE	STRESS_SIGNALLING_PROTEINS	OTHER_STRESS_RESPONSE_PROTEINS# PGPT	PGPT0015025-sigM|rpoE-K03090	2	0	0	0
PGPT0015026	INDIRECT_EFFECTS	STRESS_CONTROL|BIOCONTROL	UNIVERSAL_STRESS_RESPONSE	STRESS_SIGNALLING_PROTEINS	OTHER_STRESS_RESPONSE_PROTEINS	PGPT0015026-nhaX-NA	0	2	0	0
PGPT0015027	INDIRECT_EFFECTS	STRESS_CONTROL|BIOCONTROL	UNIVERSAL_STRESS_RESPONSE	STRESS_SIGNALLING_PROTEINS	OTHER_STRESS_RESPONSE_PROTEINS	PGPT0015027-ytxH-NA	1	0	0	0
PGPT0015045	INDIRECT_EFFECTS	STRESS_CONTROL|BIOCONTROL	UNIVERSAL_STRESS_RESPONSE	STRESS_SIGNALLING_PROTEINS	STRESS_SIGNAL-CARBON_STARVATION_RESPONSE	PGPT0015045-creC-K07641	0	0	0	1
PGPT0015050	INDIRECT_EFFECTS	STRESS_CONTROL|BIOCONTROL	UNIVERSAL_STRESS_RESPONSE	STRESS_SIGNALLING_PROTEINS	STRESS_SIGNAL-CARBON_STARVATION_RESPONSE# PGPT	PGPT0015050-slp|yeaY-K07285	0	0	0	1
PGPT0015055	INDIRECT_EFFECTS	STRESS_CONTROL|BIOCONTROL	UNIVERSAL_STRESS_RESPONSE	STRESS_SIGNALLING_PROTEINS	STRESS_SIGNAL-CARBON_STARVATION_RESPONSE	PGPT0015055-creB-K07663	0	0	0	1
PGPT0015060	INDIRECT_EFFECTS	STRESS_CONTROL|BIOCONTROL	UNIVERSAL_STRESS_RESPONSE	STRESS_SIGNALLING_PROTEINS	STRESS_SIGNAL-CARBON_STARVATION_RESPONSE	PGPT0015060-cstA-K06200	0	1	0	4
PGPT0015065	INDIRECT_EFFECTS	STRESS_CONTROL|BIOCONTROL	UNIVERSAL_STRESS_RESPONSE	STRESS_SIGNALLING_PROTEINS	STRESS_SIGNAL-CARBON_STARVATION_RESPONSE# PGPT	PGPT0015065-csrA|zfiA-K03563	1	0	0	1
PGPT0015070	INDIRECT_EFFECTS	STRESS_CONTROL|BIOCONTROL	UNIVERSAL_STRESS_RESPONSE	STRESS_SIGNALLING_PROTEINS	STRESS_SIGNAL-CARBOHYDRATE_STARVATION_RESPONSE# PGPT	PGPT0015070-cyaA-K05851	0	0	0	4
PGPT0015075	INDIRECT_EFFECTS	STRESS_CONTROL|BIOCONTROL	UNIVERSAL_STRESS_RESPONSE	STRESS_SIGNALLING_PROTEINS	STRESS_SIGNAL-CARBOHYDRATE_STARVATION_RESPONSE# PGPT	PGPT0015075-clp|crp-K10914	2	2	4	2
PGPT0015080	INDIRECT_EFFECTS	STRESS_CONTROL|BIOCONTROL	UNIVERSAL_STRESS_RESPONSE	STRESS_SIGNALLING_PROTEINS	STRESS_SIGNAL-CARBOHYDRATE_STARVATION_RESPONSE# PGPT	PGPT0015080-ptsG-K02779	0	0	0	1
PGPT0015090	INDIRECT_EFFECTS	STRESS_CONTROL|BIOCONTROL	UNIVERSAL_STRESS_RESPONSE	STRESS_SIGNALLING_PROTEINS	STRESS_SIGNAL-PHOSPHATE_STARVATION_RESPONSE	PGPT0015090-psiE|yjbA-K13256	0	0	0	1
PGPT0015095	INDIRECT_EFFECTS	STRESS_CONTROL|BIOCONTROL	UNIVERSAL_STRESS_RESPONSE	STRESS_SIGNALLING_PROTEINS	STRESS_SIGNAL-CHAPERONE|PROTEASES	PGPT0015095-prc|ctpA-K03797	0	1	1	2
PGPT0015100	INDIRECT_EFFECTS	STRESS_CONTROL|BIOCONTROL	UNIVERSAL_STRESS_RESPONSE	STRESS_SIGNALLING_PROTEINS	STRESS_SIGNAL-ENVELOPE_STRESS_RESPONSE# PGPT	PGPT0015100-cpxR-K07662	0	0	0	1
PGPT0015105	INDIRECT_EFFECTS	STRESS_CONTROL|BIOCONTROL	UNIVERSAL_STRESS_RESPONSE	STRESS_SIGNALLING_PROTEINS	STRESS_SIGNAL-CHAPERONE|PROTEASES# PGPT	PGPT0015105-degP|htrA-K04771	1	6	5	2
PGPT0015110	INDIRECT_EFFECTS	STRESS_CONTROL|BIOCONTROL	UNIVERSAL_STRESS_RESPONSE	STRESS_SIGNALLING_PROTEINS	STRESS_SIGNAL-CHAPERONE|PROTEASES# PGPT	PGPT0015110-ppiA-K03767	2	3	0	3
PGPT0015111	INDIRECT_EFFECTS	COMPETITIVE_EXCLUSION|CE	CE-BACTERIAL_FITNESS	CE-BACTERIAL_FITNESS-RESISTANCE_TO_ANTIMICROBIAL|TOXIC_COMPOUNDS	CE-BACTERIAL_FITNESS-RESISTANCE_TO_ANTIMICROBIAL_PEPTIDES	PGPT0015111-ppiB-K03768	0	1	2	2
PGPT0015115	INDIRECT_EFFECTS	STRESS_CONTROL|BIOCONTROL	UNIVERSAL_STRESS_RESPONSE	STRESS_SIGNALLING_PROTEINS	STRESS_SIGNAL-CHAPERONE|PROTEASES# PGPT	PGPT0015115-dsbA-K03673	0	1	0	0
PGPT0015190	INDIRECT_EFFECTS	PLANT_IMMUNE_RESPONSE_STIMULATION	TRIGGERED_IMMUNITY	PAMP|EFFECTOR_TRIGGERED_IMMUNITY|PTI	PTI-FLAGELLIN_TRIGGERED_IMMUNITY# PGPT	PGPT0015190-fliC|laf1|lafA|fla1|hag-K02406	0	1	2	1
PGPT0015195	INDIRECT_EFFECTS	PLANT_IMMUNE_RESPONSE_STIMULATION	TRIGGERED_IMMUNITY	PAMP|EFFECTOR_TRIGGERED_IMMUNITY|PTI	PTI-FLAGELLIN_TRIGGERED_IMMUNITY# PGPT	PGPT0015195-flgK-K02396	1	1	2	1
PGPT0015200	INDIRECT_EFFECTS	PLANT_IMMUNE_RESPONSE_STIMULATION	TRIGGERED_IMMUNITY	PAMP|EFFECTOR_TRIGGERED_IMMUNITY|PTI	PTI-FLAGELLIN_TRIGGERED_IMMUNITY# PGPT	PGPT0015200-fliD|flaB-K02407	0	1	0	0
PGPT0015226	INDIRECT_EFFECTS	STRESS_CONTROL|BIOCONTROL	UNIVERSAL_STRESS_RESPONSE	STRESS_SIGNALLING_PROTEINS	STRESS_SIGNAL-ENVELOPE_STRESS_RESPONSE# PGPT	PGPT0015226-yfhO-NA	0	0	2	0
PGPT0015240	INDIRECT_EFFECTS	PLANT_IMMUNE_RESPONSE_STIMULATION	TRIGGERED_IMMUNITY	PAMP|EFFECTOR_TRIGGERED_IMMUNITY|PTI	PTI-TEICHURONIC_ACID|LPS_ELICITOR# PGPT	PGPT0015240-wecA|tagO|rfe-K02851	1	0	0	1
PGPT0015245	INDIRECT_EFFECTS	PLANT_IMMUNE_RESPONSE_STIMULATION	TRIGGERED_IMMUNITY	PAMP|EFFECTOR_TRIGGERED_IMMUNITY|PTI	PTI-BACTERIAL_EF-TU	PGPT0015245-elf18|tuf|tufA-K02358	5	4	3	4
PGPT0015247	INDIRECT_EFFECTS	COLONIZING_PLANT_SYSTEM	ROOT_COLONIZATION	ROOT_COLONIZATION_BY_NODULATION	ROOT_ROOT_NODULATION_OUTER_PROTEINS	PGPT0015247-noeC-NA	0	0	1	0
PGPT0015275	INDIRECT_EFFECTS	PLANT_IMMUNE_RESPONSE_STIMULATION	TRIGGERED_IMMUNITY	PAMP|EFFECTOR_TRIGGERED_IMMUNITY|PTI	PTI-Nod_FACTORS# PGPT	PGPT0015275-nodI-K09695	1	1	0	0
PGPT0015276	INDIRECT_EFFECTS	COLONIZING_PLANT_SYSTEM	ROOT_COLONIZATION	ROOT_COLONIZATION_BY_NODULATION	ROOT_NODULATION_METABOLISM	PGPT0015276-nodS-NA	0	1	0	0
PGPT0015280	INDIRECT_EFFECTS	PLANT_IMMUNE_RESPONSE_STIMULATION	TRIGGERED_IMMUNITY	PAMP|EFFECTOR_TRIGGERED_IMMUNITY|PTI	PTI-Nod_FACTORS# PGPT	PGPT0015280-nodJ-K09694	2	1	0	0
PGPT0015282	INDIRECT_EFFECTS	COLONIZING_PLANT_SYSTEM	ROOT_COLONIZATION	ROOT_COLONIZATION_BY_NODULATION	ROOT_NODULATION_METABOLISM	PGPT0015282-nodN_like-NA	0	1	0	0
PGPT0015285	INDIRECT_EFFECTS	PLANT_IMMUNE_RESPONSE_STIMULATION	TRIGGERED_IMMUNITY	PAMP|EFFECTOR_TRIGGERED_IMMUNITY|PTI	PTI-Nod_FACTORS# PGPT	PGPT0015285-nodU-K00612	1	1	1	0
PGPT0015286	INDIRECT_EFFECTS	COLONIZING_PLANT_SYSTEM	ROOT_COLONIZATION	ROOT_COLONIZATION_BY_NODULATION	ROOT_NODULE_REGULATION	PGPT0015286-nodV-NA	1	1	0	2
PGPT0015288	INDIRECT_EFFECTS	COLONIZING_PLANT_SYSTEM	ROOT_COLONIZATION	ROOT_COLONIZATION_BY_NODULATION	ROOT_NODULE_REGULATION	PGPT0015288-nodW-NA	0	2	0	1
PGPT0015289	INDIRECT_EFFECTS	COLONIZING_PLANT_SYSTEM	ROOT_COLONIZATION	ROOT_COLONIZATION_BY_NODULATION	ROOT_NODULE_REGULATION	PGPT0015289-nodX-NA	0	0	1	0
PGPT0015295	INDIRECT_EFFECTS	PLANT_IMMUNE_RESPONSE_STIMULATION	TRIGGERED_IMMUNITY	PAMP|EFFECTOR_TRIGGERED_IMMUNITY|PTI	PTI-Nod_FACTORS# PGPT	PGPT0015295-nodT|ameC-K18904	0	1	1	3
PGPT0015320	INDIRECT_EFFECTS	COLONIZING_PLANT_SYSTEM	COLONIZATION-MOTILITY|CHEMOTAXIS	MOTILITY-FLAGELLAR_ASSEMBLY	MOTILITY-FLAGELLUM_TYPE-III_SECRETION# PGPT	PGPT0015320-flhA|lfhA|fhiA|rhcV-K02400	1	1	1	1
PGPT0015325	INDIRECT_EFFECTS	COLONIZING_PLANT_SYSTEM	COLONIZATION-MOTILITY|CHEMOTAXIS	MOTILITY-FLAGELLAR_ASSEMBLY	MOTILITY-FLAGELLUM_TYPE-III_SECRETION# PGPT	PGPT0015325-flhB-K02401	1	1	1	2
PGPT0015330	INDIRECT_EFFECTS	COLONIZING_PLANT_SYSTEM	COLONIZATION-MOTILITY|CHEMOTAXIS	MOTILITY-FLAGELLAR_ASSEMBLY	MOTILITY-FLAGELLUM_TYPE-III_SECRETION	PGPT0015330-flhE-K03516	0	1	0	0
PGPT0015335	INDIRECT_EFFECTS	COLONIZING_PLANT_SYSTEM	COLONIZATION-MOTILITY|CHEMOTAXIS	MOTILITY-FLAGELLAR_ASSEMBLY	MOTILITY-FLAGELLUM_TYPE-III_SECRETION# PGPT	PGPT0015335-fliH-K02411	1	1	1	1
PGPT0015340	INDIRECT_EFFECTS	COLONIZING_PLANT_SYSTEM	COLONIZATION-MOTILITY|CHEMOTAXIS	MOTILITY-FLAGELLAR_ASSEMBLY	MOTILITY-FLAGELLUM_TYPE-III_SECRETION# PGPT	PGPT0015340-fliI|lgiI-K02412	2	1	2	2
PGPT0015345	INDIRECT_EFFECTS	COLONIZING_PLANT_SYSTEM	COLONIZATION-MOTILITY|CHEMOTAXIS	MOTILITY-FLAGELLAR_ASSEMBLY	MOTILITY-FLAGELLUM_TYPE-III_SECRETION# PGPT	PGPT0015345-fliOZ-K02418	1	1	2	1
PGPT0015350	INDIRECT_EFFECTS	COLONIZING_PLANT_SYSTEM	COLONIZATION-MOTILITY|CHEMOTAXIS	MOTILITY-FLAGELLAR_ASSEMBLY	MOTILITY-FLAGELLUM_TYPE-III_SECRETION# PGPT	PGPT0015350-fliP|rhcR-K02419	1	1	1	0
PGPT0015355	INDIRECT_EFFECTS	COLONIZING_PLANT_SYSTEM	COLONIZATION-MOTILITY|CHEMOTAXIS	MOTILITY-FLAGELLAR_ASSEMBLY	MOTILITY-FLAGELLUM_TYPE-III_SECRETION# PGPT	PGPT0015355-fliQ|lfiQ-K02420	1	1	1	0
PGPT0015360	INDIRECT_EFFECTS	COLONIZING_PLANT_SYSTEM	COLONIZATION-MOTILITY|CHEMOTAXIS	MOTILITY-FLAGELLAR_ASSEMBLY	MOTILITY-FLAGELLUM_TYPE-III_SECRETION# PGPT	PGPT0015360-fliR|lfiR-K02421	1	1	1	1
PGPT0015370	INDIRECT_EFFECTS	COLONIZING_PLANT_SYSTEM	COLONIZATION-MOTILITY|CHEMOTAXIS	MOTILITY-FLAGELLAR_ASSEMBLY	MOTILITY-FLAGELLUM_MOTOR|SWITCH	PGPT0015370-motA-K02556	1	1	1	1
PGPT0015375	INDIRECT_EFFECTS	COLONIZING_PLANT_SYSTEM	COLONIZATION-MOTILITY|CHEMOTAXIS	MOTILITY-FLAGELLAR_ASSEMBLY	MOTILITY-FLAGELLUM_MOTOR|SWITCH	PGPT0015375-motB-K02557	1	2	2	2
PGPT0015400	INDIRECT_EFFECTS	COLONIZING_PLANT_SYSTEM	COLONIZATION-MOTILITY|CHEMOTAXIS	MOTILITY-FLAGELLAR_ASSEMBLY	MOTILITY-FLAGELLUM_C-RING	PGPT0015400-fliG-K02410	1	1	1	1
PGPT0015405	INDIRECT_EFFECTS	COLONIZING_PLANT_SYSTEM	COLONIZATION-MOTILITY|CHEMOTAXIS	MOTILITY-FLAGELLAR_ASSEMBLY	MOTILITY-FLAGELLUM_C-RING	PGPT0015405-fliM-K02416	1	1	1	1
PGPT0015410	INDIRECT_EFFECTS	COLONIZING_PLANT_SYSTEM	COLONIZATION-MOTILITY|CHEMOTAXIS	MOTILITY-FLAGELLAR_ASSEMBLY	MOTILITY-FLAGELLUM_C-RING# PGPT	PGPT0015410-fliN|lfiN|fliNY|cheC|cheD-K02417	1	1	2	1
PGPT0015415	INDIRECT_EFFECTS	COLONIZING_PLANT_SYSTEM	COLONIZATION-MOTILITY|CHEMOTAXIS	MOTILITY-FLAGELLAR_ASSEMBLY	MOTILITY-FLAGELLUM_M|S|P|L-RINGS	PGPT0015415-flgA-K02386	0	1	1	1
PGPT0015420	INDIRECT_EFFECTS	COLONIZING_PLANT_SYSTEM	COLONIZATION-MOTILITY|CHEMOTAXIS	MOTILITY-FLAGELLAR_ASSEMBLY	MOTILITY-FLAGELLUM_M|S|P|L-RINGS	PGPT0015420-flgH-K02393	0	1	1	0
PGPT0015425	INDIRECT_EFFECTS	COLONIZING_PLANT_SYSTEM	COLONIZATION-MOTILITY|CHEMOTAXIS	MOTILITY-FLAGELLAR_ASSEMBLY	MOTILITY-FLAGELLUM_M|S|P|L-RINGS	PGPT0015425-flgI-K02394	0	1	1	1
PGPT0015430	INDIRECT_EFFECTS	COLONIZING_PLANT_SYSTEM	COLONIZATION-MOTILITY|CHEMOTAXIS	MOTILITY-FLAGELLAR_ASSEMBLY	MOTILITY-FLAGELLUM_M|S|P|L-RINGS# PGPT	PGPT0015430-fliF-K02409	1	2	1	3
PGPT0015435	INDIRECT_EFFECTS	COLONIZING_PLANT_SYSTEM	COLONIZATION-MOTILITY|CHEMOTAXIS	MOTILITY-FLAGELLAR_ASSEMBLY	MOTILITY-FLAGELLUM_ROD|HOOK|FILAMENT	PGPT0015435-flaF-K06602	0	0	1	0
PGPT0015460	INDIRECT_EFFECTS	COLONIZING_PLANT_SYSTEM	COLONIZATION-MOTILITY|CHEMOTAXIS	MOTILITY-FLAGELLAR_ASSEMBLY	MOTILITY-FLAGELLUM_ROD|HOOK|FILAMENT	PGPT0015460-flbD-K02385	1	0	0	0
PGPT0015465	INDIRECT_EFFECTS	COLONIZING_PLANT_SYSTEM	COLONIZATION-MOTILITY|CHEMOTAXIS	MOTILITY-FLAGELLAR_ASSEMBLY	MOTILITY-FLAGELLUM_ROD|HOOK|FILAMENT	PGPT0015465-flbT-K06601	0	0	1	0
PGPT0015470	INDIRECT_EFFECTS	COLONIZING_PLANT_SYSTEM	COLONIZATION-MOTILITY|CHEMOTAXIS	MOTILITY-FLAGELLAR_ASSEMBLY	MOTILITY-FLAGELLUM_ROD|HOOK|FILAMENT	PGPT0015470-flgB-K02387	1	1	1	0
PGPT0015475	INDIRECT_EFFECTS	COLONIZING_PLANT_SYSTEM	COLONIZATION-MOTILITY|CHEMOTAXIS	MOTILITY-FLAGELLAR_ASSEMBLY	MOTILITY-FLAGELLUM_ROD|HOOK|FILAMENT	PGPT0015475-flgC-K02388	1	1	1	1
PGPT0015480	INDIRECT_EFFECTS	COLONIZING_PLANT_SYSTEM	COLONIZATION-MOTILITY|CHEMOTAXIS	MOTILITY-FLAGELLAR_ASSEMBLY	MOTILITY-FLAGELLUM_ROD|HOOK|FILAMENT	PGPT0015480-flgD-K02389	1	1	1	1
PGPT0015485	INDIRECT_EFFECTS	COLONIZING_PLANT_SYSTEM	COLONIZATION-MOTILITY|CHEMOTAXIS	MOTILITY-FLAGELLAR_ASSEMBLY	MOTILITY-FLAGELLUM_ROD|HOOK|FILAMENT	PGPT0015485-flgE-K02390	1	2	1	2
PGPT0015490	INDIRECT_EFFECTS	COLONIZING_PLANT_SYSTEM	COLONIZATION-MOTILITY|CHEMOTAXIS	MOTILITY-FLAGELLAR_ASSEMBLY	MOTILITY-FLAGELLUM_ROD|HOOK|FILAMENT	PGPT0015490-flgF-K02391	0	1	1	1
PGPT0015495	INDIRECT_EFFECTS	COLONIZING_PLANT_SYSTEM	COLONIZATION-MOTILITY|CHEMOTAXIS	MOTILITY-FLAGELLAR_ASSEMBLY	MOTILITY-FLAGELLUM_ROD|HOOK|FILAMENT	PGPT0015495-flgG-K02392	0	1	1	1
PGPT0015500	INDIRECT_EFFECTS	COLONIZING_PLANT_SYSTEM	COLONIZATION-MOTILITY|CHEMOTAXIS	MOTILITY-FLAGELLAR_ASSEMBLY	MOTILITY-FLAGELLUM_ROD|HOOK|FILAMENT	PGPT0015500-flgJ-K02395	0	1	2	1
PGPT0015505	INDIRECT_EFFECTS	COLONIZING_PLANT_SYSTEM	COLONIZATION-MOTILITY|CHEMOTAXIS	MOTILITY-FLAGELLAR_ASSEMBLY	MOTILITY-FLAGELLUM_ROD|HOOK|FILAMENT	PGPT0015505-flgL-K02397	1	1	2	1
PGPT0015515	INDIRECT_EFFECTS	COLONIZING_PLANT_SYSTEM	COLONIZATION-MOTILITY|CHEMOTAXIS	MOTILITY-FLAGELLAR_ASSEMBLY	MOTILITY-FLAGELLUM_ROD|HOOK|FILAMENT	PGPT0015515-fliE|lfiE-K02408	1	1	1	1
PGPT0015520	INDIRECT_EFFECTS	COLONIZING_PLANT_SYSTEM	COLONIZATION-MOTILITY|CHEMOTAXIS	MOTILITY-FLAGELLAR_ASSEMBLY	MOTILITY-FLAGELLUM_ROD|HOOK|FILAMENT	PGPT0015520-fliK|motD-K02414	0	1	1	0
PGPT0015525	INDIRECT_EFFECTS	COLONIZING_PLANT_SYSTEM	COLONIZATION-MOTILITY|CHEMOTAXIS	MOTILITY-FLAGELLAR_ASSEMBLY	MOTILITY-FLAGELLUM_ROD|HOOK|FILAMENT	PGPT0015525-fliL-K02415	1	1	1	0
PGPT0015530	INDIRECT_EFFECTS	COLONIZING_PLANT_SYSTEM	COLONIZATION-MOTILITY|CHEMOTAXIS	MOTILITY-FLAGELLUM_CONTROL	MOTILITY-FLAGELLUM_REGULATION# PGPT	PGPT0015530-flgM-K02398	0	1	0	1
PGPT0015535	INDIRECT_EFFECTS	COLONIZING_PLANT_SYSTEM	COLONIZATION-MOTILITY|CHEMOTAXIS	MOTILITY-FLAGELLUM_CONTROL	MOTILITY-FLAGELLUM_REGULATION	PGPT0015535-flgN-K02399	0	1	0	1
PGPT0015540	INDIRECT_EFFECTS	COLONIZING_PLANT_SYSTEM	COLONIZATION-MOTILITY|CHEMOTAXIS	MOTILITY-FLAGELLUM_CONTROL	MOTILITY-FLAGELLUM_REGULATION# PGPT	PGPT0015540-flhC-K02402	0	1	0	1
PGPT0015545	INDIRECT_EFFECTS	COLONIZING_PLANT_SYSTEM	COLONIZATION-MOTILITY|CHEMOTAXIS	MOTILITY-FLAGELLUM_CONTROL	MOTILITY-FLAGELLUM_REGULATION# PGPT	PGPT0015545-flhD-K02403	0	1	0	1
PGPT0015550	INDIRECT_EFFECTS	COLONIZING_PLANT_SYSTEM	COLONIZATION-MOTILITY|CHEMOTAXIS	MOTILITY-FLAGELLUM_CONTROL	MOTILITY-FLAGELLUM_REGULATION	PGPT0015550-flhF-K02404	0	2	0	0
PGPT0015555	INDIRECT_EFFECTS	COLONIZING_PLANT_SYSTEM	COLONIZATION-MOTILITY|CHEMOTAXIS	MOTILITY-FLAGELLUM_CONTROL	MOTILITY-FLAGELLUM_REGULATION	PGPT0015555-flhG-K04562	0	2	2	0
PGPT0015570	INDIRECT_EFFECTS	COLONIZING_PLANT_SYSTEM	COLONIZATION-MOTILITY|CHEMOTAXIS	MOTILITY-FLAGELLUM_CONTROL	MOTILITY-FLAGELLUM_REGULATION	PGPT0015570-flrC|fleR-K10943	0	0	1	0
PGPT0015575	INDIRECT_EFFECTS	COLONIZING_PLANT_SYSTEM	COLONIZATION-MOTILITY|CHEMOTAXIS	MOTILITY-FLAGELLUM_CONTROL	MOTILITY-FLAGELLUM_REGULATION# PGPT	PGPT0015575-qsmR-K20329	0	6	0	0
PGPT0015585	INDIRECT_EFFECTS	COLONIZING_PLANT_SYSTEM	COLONIZATION-MOTILITY|CHEMOTAXIS	MOTILITY-FLAGELLUM_CONTROL	MOTILITY-FLAGELLUM_REGULATION	PGPT0015585-tipF-K13593	0	0	1	0
PGPT0015590	INDIRECT_EFFECTS	COLONIZING_PLANT_SYSTEM	COLONIZATION-MOTILITY|CHEMOTAXIS	MOTILITY-FLAGELLUM_CONTROL	MOTILITY-FLAGELLUM_REGULATION# PGPT	PGPT0015590-fhrR-K20325	1	0	0	0
PGPT0015595	INDIRECT_EFFECTS	COLONIZING_PLANT_SYSTEM	COLONIZATION-MOTILITY|CHEMOTAXIS	MOTILITY-FLAGELLUM_CONTROL	MOTILITY-FLAGELLUM_REGULATION# PGPT	PGPT0015595-gcrA-K13583	0	0	1	0
PGPT0015600	INDIRECT_EFFECTS	COLONIZING_PLANT_SYSTEM	COLONIZATION-MOTILITY|CHEMOTAXIS	MOTILITY-FLAGELLUM_CONTROL	MOTILITY-FLAGELLUM_REGULATION# PGPT	PGPT0015600-ctrA-K13584	0	0	1	0
PGPT0015610	INDIRECT_EFFECTS	COLONIZING_PLANT_SYSTEM	COLONIZATION-MOTILITY|CHEMOTAXIS	MOTILITY-FLAGELLUM_CONTROL	MOTILITY-FLAGELLUM_CHAPERONES# PGPT	PGPT0015610-fliA|sigD|whiG-K02405	1	1	0	1
PGPT0015615	INDIRECT_EFFECTS	COLONIZING_PLANT_SYSTEM	COLONIZATION-MOTILITY|CHEMOTAXIS	MOTILITY-FLAGELLUM_CONTROL	MOTILITY-FLAGELLUM_CHAPERONES	PGPT0015615-fliJ-K02413	1	1	1	0
PGPT0015625	INDIRECT_EFFECTS	COLONIZING_PLANT_SYSTEM	COLONIZATION-MOTILITY|CHEMOTAXIS	MOTILITY-FLAGELLUM_CONTROL	MOTILITY-FLAGELLUM_CHAPERONES	PGPT0015625-fliT-K02423	0	1	0	0
PGPT0015630	INDIRECT_EFFECTS	COLONIZING_PLANT_SYSTEM	COLONIZATION-MOTILITY|CHEMOTAXIS	MOTILITY-FLAGELLUM_CONTROL	MOTILITY-FLAGELLUM_CHAPERONES	PGPT0015630-fliW-K13626	1	0	0	0
PGPT0015635	INDIRECT_EFFECTS	COLONIZING_PLANT_SYSTEM	COLONIZATION-MOTILITY|CHEMOTAXIS	MOTILITY-FLAGELLUM_CONTROL	MOTILITY-FLAGELLUM_CHAPERONES# PGPT	PGPT0015635-fliY|tcyA|yckK-K02424	0	1	0	1
PGPT0015640	INDIRECT_EFFECTS	COLONIZING_PLANT_SYSTEM	COLONIZATION-MOTILITY|CHEMOTAXIS	MOTILITY-FLAGELLUM_CONTROL	MOTILITY-FLAGELLUM_CHAPERONES# PGPT	PGPT0015640-fliZ-K02425	0	0	0	1
PGPT0015645	INDIRECT_EFFECTS	COLONIZING_PLANT_SYSTEM	COLONIZATION-MOTILITY|CHEMOTAXIS	CHEMOTAXIS_PROTEINS	CHEMOTAXIS_TWO_COMPONENT_SYSTEM_PROTEINS	PGPT0015645-cheA|wspE-K03407	1	2	4	2
PGPT0015650	INDIRECT_EFFECTS	COLONIZING_PLANT_SYSTEM	COLONIZATION-MOTILITY|CHEMOTAXIS	CHEMOTAXIS_PROTEINS	CHEMOTAXIS_TWO_COMPONENT_SYSTEM_PROTEINS	PGPT0015650-cheB|chpB|wspF-K03412	1	2	2	1
PGPT0015655	INDIRECT_EFFECTS	COLONIZING_PLANT_SYSTEM	COLONIZATION-MOTILITY|CHEMOTAXIS	CHEMOTAXIS_PROTEINS	CHEMOTAXIS_TWO_COMPONENT_SYSTEM_PROTEINS	PGPT0015655-cheBR-K13924	1	5	3	1
PGPT0015665	INDIRECT_EFFECTS	COLONIZING_PLANT_SYSTEM	COLONIZATION-MOTILITY|CHEMOTAXIS	CHEMOTAXIS_PROTEINS	CHEMOTAXIS_TWO_COMPONENT_SYSTEM_PROTEINS	PGPT0015665-cheD-K03411	0	1	1	0
PGPT0015670	INDIRECT_EFFECTS	COLONIZING_PLANT_SYSTEM	COLONIZATION-MOTILITY|CHEMOTAXIS	CHEMOTAXIS_PROTEINS	CHEMOTAXIS_TWO_COMPONENT_SYSTEM_PROTEINS	PGPT0015670-cheR|pilK-K00575	1	2	3	2
PGPT0015675	INDIRECT_EFFECTS	COLONIZING_PLANT_SYSTEM	COLONIZATION-MOTILITY|CHEMOTAXIS	CHEMOTAXIS_PROTEINS	CHEMOTAXIS_TWO_COMPONENT_SYSTEM_PROTEINS	PGPT0015675-cheV-K03415	0	1	0	2
PGPT0015680	INDIRECT_EFFECTS	COLONIZING_PLANT_SYSTEM	COLONIZATION-MOTILITY|CHEMOTAXIS	CHEMOTAXIS_PROTEINS	CHEMOTAXIS_TWO_COMPONENT_SYSTEM_PROTEINS	PGPT0015680-cheW-K03408	1	2	2	1
PGPT0015685	INDIRECT_EFFECTS	COLONIZING_PLANT_SYSTEM	COLONIZATION-MOTILITY|CHEMOTAXIS	CHEMOTAXIS_PROTEINS	CHEMOTAXIS_TWO_COMPONENT_SYSTEM_PROTEINS	PGPT0015685-cheX-K03409	1	0	0	0
PGPT0015690	INDIRECT_EFFECTS	COLONIZING_PLANT_SYSTEM	COLONIZATION-MOTILITY|CHEMOTAXIS	CHEMOTAXIS_PROTEINS	CHEMOTAXIS_TWO_COMPONENT_SYSTEM_PROTEINS	PGPT0015690-cheY|yneI-K03413	3	2	5	1
PGPT0015695	INDIRECT_EFFECTS	COLONIZING_PLANT_SYSTEM	COLONIZATION-MOTILITY|CHEMOTAXIS	CHEMOTAXIS_PROTEINS	CHEMOTAXIS_TWO_COMPONENT_SYSTEM_PROTEINS	PGPT0015695-cheZ-K03414	0	1	0	1
PGPT0015700	INDIRECT_EFFECTS	COLONIZING_PLANT_SYSTEM	COLONIZATION-MOTILITY|CHEMOTAXIS	CHEMOTAXIS_PROTEINS	METHYL-ACCEPTING_CHEMOTAXIS_PROTEINS	PGPT0015700-aer-K03776	0	1	0	0
PGPT0015710	INDIRECT_EFFECTS	COLONIZING_PLANT_SYSTEM	COLONIZATION-MOTILITY|CHEMOTAXIS	CHEMOTAXIS_PROTEINS	METHYL-ACCEPTING_CHEMOTAXIS_PROTEINS# PGPT	PGPT0015710-mcp|tlpC|tlpA|dcrA-K03406	2	11	17	2
PGPT0015715	INDIRECT_EFFECTS	COLONIZING_PLANT_SYSTEM	COLONIZATION-MOTILITY|CHEMOTAXIS	CHEMOTAXIS_PROTEINS	METHYL-ACCEPTING_CHEMOTAXIS_PROTEINS	PGPT0015715-tap-K05877	0	0	0	2
PGPT0015720	INDIRECT_EFFECTS	COLONIZING_PLANT_SYSTEM	COLONIZATION-MOTILITY|CHEMOTAXIS	CHEMOTAXIS_PROTEINS	METHYL-ACCEPTING_CHEMOTAXIS_PROTEINS	PGPT0015720-tar-K05875	0	0	0	2
PGPT0015725	INDIRECT_EFFECTS	COLONIZING_PLANT_SYSTEM	COLONIZATION-MOTILITY|CHEMOTAXIS	CHEMOTAXIS_PROTEINS	METHYL-ACCEPTING_CHEMOTAXIS_PROTEINS	PGPT0015725-trg-K05876	0	0	0	1
PGPT0015730	INDIRECT_EFFECTS	COLONIZING_PLANT_SYSTEM	COLONIZATION-MOTILITY|CHEMOTAXIS	CHEMOTAXIS_PROTEINS	METHYL-ACCEPTING_CHEMOTAXIS_PROTEINS	PGPT0015730-tsr-K05874	0	5	0	4
PGPT0015740	INDIRECT_EFFECTS	COLONIZING_PLANT_SYSTEM	COLONIZATION-MOTILITY|CHEMOTAXIS	CHEMOTAXIS_PROTEINS	CHEMOTAXIS_TOWARDS_SUGARS# PGPT	PGPT0015740-rbsB-K10439	0	0	1	3
PGPT0015745	INDIRECT_EFFECTS	COLONIZING_PLANT_SYSTEM	COLONIZATION-MOTILITY|CHEMOTAXIS	CHEMOTAXIS_PROTEINS	CHEMOTAXIS_TOWARDS_SUGARS# PGPT	PGPT0015745-mglB-K10540	0	0	0	2
PGPT0015750	INDIRECT_EFFECTS	COLONIZING_PLANT_SYSTEM	COLONIZATION-MOTILITY|CHEMOTAXIS	CHEMOTAXIS_PROTEINS	CHEMOTAXIS_RELATED_PROTEINS# PGPT	PGPT0015750-wspA-K13487	0	1	1	0
PGPT0015755	INDIRECT_EFFECTS	COLONIZING_PLANT_SYSTEM	COLONIZATION-MOTILITY|CHEMOTAXIS	CHEMOTAXIS_PROTEINS	CHEMOTAXIS_RELATED_PROTEINS# PGPT	PGPT0015755-wspB-K13488	0	1	1	0
PGPT0015770	INDIRECT_EFFECTS	COLONIZING_PLANT_SYSTEM	COLONIZATION-MOTILITY|CHEMOTAXIS	CHEMOTAXIS_PROTEINS	CHEMOTAXIS_RELATED_PROTEINS# PGPT	PGPT0015770-wspE-K13490	0	1	0	0
PGPT0015775	INDIRECT_EFFECTS	COLONIZING_PLANT_SYSTEM	COLONIZATION-MOTILITY|CHEMOTAXIS	CHEMOTAXIS_PROTEINS	CHEMOTAXIS_RELATED_PROTEINS# PGPT	PGPT0015775-wspF-K13491	0	1	0	0
PGPT0015780	INDIRECT_EFFECTS	COLONIZING_PLANT_SYSTEM	COLONIZATION-MOTILITY|CHEMOTAXIS	CHEMOTAXIS_PROTEINS	CHEMOTAXIS_RELATED_PROTEINS# PGPT	PGPT0015780-wspR-K11444	0	2	1	0
PGPT0015785	INDIRECT_EFFECTS	COLONIZING_PLANT_SYSTEM	COLONIZATION-MOTILITY|CHEMOTAXIS	MOTILITY-PILUS|FIMBRIAE_SYSTEM	MOTILITY-CHEMOSENSORY_PILI_SYSTEM# PGPT	PGPT0015785-chpA-K06596	0	3	0	0
PGPT0015800	INDIRECT_EFFECTS	COLONIZING_PLANT_SYSTEM	COLONIZATION-MOTILITY|CHEMOTAXIS	MOTILITY-PILUS|FIMBRIAE_SYSTEM	MOTILITY-CHEMOSENSORY_PILI_SYSTEM	PGPT0015800-chpD-K06599	0	0	2	0
PGPT0015835	INDIRECT_EFFECTS	COLONIZING_PLANT_SYSTEM	COLONIZATION-MOTILITY|CHEMOTAXIS	MOTILITY-PILUS|FIMBRIAE_SYSTEM	MOTILITY-PILUS_SYSTEM-TWITCHING_MOTILITY# PGPT	PGPT0015835-pilG-K02657	0	1	0	0
PGPT0015840	INDIRECT_EFFECTS	COLONIZING_PLANT_SYSTEM	COLONIZATION-MOTILITY|CHEMOTAXIS	MOTILITY-PILUS|FIMBRIAE_SYSTEM	MOTILITY-PILUS_SYSTEM-TWITCHING_MOTILITY# PGPT	PGPT0015840-pilH-K02658	0	1	0	0
PGPT0015845	INDIRECT_EFFECTS	COLONIZING_PLANT_SYSTEM	COLONIZATION-MOTILITY|CHEMOTAXIS	MOTILITY-PILUS|FIMBRIAE_SYSTEM	MOTILITY-PILUS_SYSTEM-TWITCHING_MOTILITY# PGPT	PGPT0015845-pilI-K02659	0	1	0	0
PGPT0015850	INDIRECT_EFFECTS	COLONIZING_PLANT_SYSTEM	COLONIZATION-MOTILITY|CHEMOTAXIS	MOTILITY-PILUS|FIMBRIAE_SYSTEM	MOTILITY-PILUS_SYSTEM-TWITCHING_MOTILITY# PGPT	PGPT0015850-pilJ-K02660	0	1	0	0
PGPT0015865	INDIRECT_EFFECTS	COLONIZING_PLANT_SYSTEM	COLONIZATION-MOTILITY|CHEMOTAXIS	MOTILITY-PILUS|FIMBRIAE_SYSTEM	MOTILITY-PILUS_SYSTEM-TWITCHING_MOTILITY# PGPT	PGPT0015865-pilR|pehR-K02667	0	1	0	0
PGPT0015870	INDIRECT_EFFECTS	COLONIZING_PLANT_SYSTEM	COLONIZATION-MOTILITY|CHEMOTAXIS	MOTILITY-PILUS|FIMBRIAE_SYSTEM	MOTILITY-PILUS_SYSTEM-TWITCHING_MOTILITY# PGPT	PGPT0015870-pilS|pehS-K02668	0	1	0	0
PGPT0015875	INDIRECT_EFFECTS	COLONIZING_PLANT_SYSTEM	COLONIZATION-MOTILITY|CHEMOTAXIS	MOTILITY-PILUS|FIMBRIAE_SYSTEM	MOTILITY-PILUS_SYSTEM-TWITCHING_MOTILITY# PGPT	PGPT0015875-pilT-K02669	0	1	0	0
PGPT0015880	INDIRECT_EFFECTS	COLONIZING_PLANT_SYSTEM	COLONIZATION-MOTILITY|CHEMOTAXIS	MOTILITY-PILUS|FIMBRIAE_SYSTEM	MOTILITY-PILUS_SYSTEM-TWITCHING_MOTILITY# PGPT	PGPT0015880-pilU-K02670	0	1	0	0
PGPT0015890	INDIRECT_EFFECTS	COLONIZING_PLANT_SYSTEM	COLONIZATION-MOTILITY|CHEMOTAXIS	MOTILITY-PILUS|FIMBRIAE_SYSTEM	MOTILITY-PILUS_SYSTEM	PGPT0015890-podJ-K13582	0	0	3	0
PGPT0015895	INDIRECT_EFFECTS	COLONIZING_PLANT_SYSTEM	COLONIZATION-MOTILITY|CHEMOTAXIS	MOTILITY-PILUS|FIMBRIAE_SYSTEM	MOTILITY-PILUS_SYSTEM# PGPT	PGPT0015895-pleC-K07716	0	0	5	0
PGPT0015900	INDIRECT_EFFECTS	COLONIZING_PLANT_SYSTEM	COLONIZATION-MOTILITY|CHEMOTAXIS	MOTILITY-PILUS|FIMBRIAE_SYSTEM	MOTILITY-PILUS_SYSTEM# PGPT	PGPT0015900-pleD-K02488	3	2	5	0
PGPT0015910	INDIRECT_EFFECTS	COLONIZING_PLANT_SYSTEM	COLONIZATION-MOTILITY|CHEMOTAXIS	MOTILITY-PILUS|FIMBRIAE_SYSTEM	MOTILITY-PILUS_SYSTEM# PGPT	PGPT0015910-flp|pilA-K02651	1	1	0	0
PGPT0015915	INDIRECT_EFFECTS	COLONIZING_PLANT_SYSTEM	COLONIZATION-MOTILITY|CHEMOTAXIS	MOTILITY-PILUS|FIMBRIAE_SYSTEM	MOTILITY-PILUS_SYSTEM# PGPT	PGPT0015915-pilB-K02652	0	2	0	0
PGPT0015920	INDIRECT_EFFECTS	COLONIZING_PLANT_SYSTEM	COLONIZATION-MOTILITY|CHEMOTAXIS	MOTILITY-PILUS|FIMBRIAE_SYSTEM	MOTILITY-PILUS_SYSTEM# PGPT	PGPT0015920-pilC-K02653	0	1	0	0
PGPT0015925	INDIRECT_EFFECTS	COLONIZING_PLANT_SYSTEM	COLONIZATION-MOTILITY|CHEMOTAXIS	MOTILITY-PILUS|FIMBRIAE_SYSTEM	MOTILITY-PILUS_SYSTEM# PGPT	PGPT0015925-pilD-K02654	0	1	0	0
PGPT0015935	INDIRECT_EFFECTS	COLONIZING_PLANT_SYSTEM	COLONIZATION-MOTILITY|CHEMOTAXIS	MOTILITY-PILUS|FIMBRIAE_SYSTEM	MOTILITY-PILUS_SYSTEM# PGPT	PGPT0015935-pilF-K02656	0	1	0	0
PGPT0015940	INDIRECT_EFFECTS	COLONIZING_PLANT_SYSTEM	COLONIZATION-MOTILITY|CHEMOTAXIS	MOTILITY-PILUS|FIMBRIAE_SYSTEM	MOTILITY-PILUS_SYSTEM# PGPT	PGPT0015940-pilN-K02663	0	1	0	0
PGPT0015945	INDIRECT_EFFECTS	COLONIZING_PLANT_SYSTEM	COLONIZATION-MOTILITY|CHEMOTAXIS	MOTILITY-PILUS|FIMBRIAE_SYSTEM	MOTILITY-PILUS_SYSTEM# PGPT	PGPT0015945-pilM-K02662	0	1	0	0
PGPT0015950	INDIRECT_EFFECTS	COLONIZING_PLANT_SYSTEM	COLONIZATION-MOTILITY|CHEMOTAXIS	MOTILITY-PILUS|FIMBRIAE_SYSTEM	MOTILITY-PILUS_SYSTEM# PGPT	PGPT0015950-pilP-K02665	0	1	0	0
PGPT0015955	INDIRECT_EFFECTS	COLONIZING_PLANT_SYSTEM	COLONIZATION-MOTILITY|CHEMOTAXIS	MOTILITY-PILUS|FIMBRIAE_SYSTEM	MOTILITY-PILUS_SYSTEM# PGPT	PGPT0015955-pilO-K02664	0	1	0	0
PGPT0015965	INDIRECT_EFFECTS	COLONIZING_PLANT_SYSTEM	COLONIZATION-MOTILITY|CHEMOTAXIS	MOTILITY-PILUS|FIMBRIAE_SYSTEM	MOTILITY-PILUS_SYSTEM# PGPT	PGPT0015965-pilQ-K02666	0	1	0	0
PGPT0015970	INDIRECT_EFFECTS	COLONIZING_PLANT_SYSTEM	COLONIZATION-MOTILITY|CHEMOTAXIS	MOTILITY-PILUS|FIMBRIAE_SYSTEM	MOTILITY-PILUS_SYSTEM# PGPT	PGPT0015970-pilZ-K02676	0	1	0	0
PGPT0016005	INDIRECT_EFFECTS	COLONIZING_PLANT_SYSTEM	COLONIZATION-MOTILITY|CHEMOTAXIS	MOTILITY-PILUS|FIMBRIAE_SYSTEM	MOTILITY-PILUS_SYSTEM# PGPT	PGPT0016005-cpaB-K02279	2	1	1	0
PGPT0016010	INDIRECT_EFFECTS	COLONIZING_PLANT_SYSTEM	COLONIZATION-MOTILITY|CHEMOTAXIS	MOTILITY-PILUS|FIMBRIAE_SYSTEM	MOTILITY-PILUS_SYSTEM# PGPT	PGPT0016010-cpaC-K02280	0	1	1	0
PGPT0016015	INDIRECT_EFFECTS	COLONIZING_PLANT_SYSTEM	COLONIZATION-MOTILITY|CHEMOTAXIS	MOTILITY-PILUS|FIMBRIAE_SYSTEM	MOTILITY-PILUS_SYSTEM# PGPT	PGPT0016015-cpaD-K02281	0	0	1	0
PGPT0016020	INDIRECT_EFFECTS	COLONIZING_PLANT_SYSTEM	COLONIZATION-MOTILITY|CHEMOTAXIS	MOTILITY-PILUS|FIMBRIAE_SYSTEM	MOTILITY-PILUS_SYSTEM# PGPT	PGPT0016020-cpaE-K02282	1	1	1	0
PGPT0016025	INDIRECT_EFFECTS	COLONIZING_PLANT_SYSTEM	COLONIZATION-MOTILITY|CHEMOTAXIS	MOTILITY-PILUS|FIMBRIAE_SYSTEM	MOTILITY-PILUS_SYSTEM# PGPT	PGPT0016025-cpaF-K02283	4	1	1	0
PGPT0016030	INDIRECT_EFFECTS	COLONIZING_PLANT_SYSTEM	COLONIZATION-MOTILITY|CHEMOTAXIS	MOTILITY-PILUS|FIMBRIAE_SYSTEM	MOTILITY-FIMBRIAE_SYSTEM# PGPT	PGPT0016030-fimA-K07345	0	0	0	2
PGPT0016035	INDIRECT_EFFECTS	COLONIZING_PLANT_SYSTEM	COLONIZATION-MOTILITY|CHEMOTAXIS	MOTILITY-PILUS|FIMBRIAE_SYSTEM	MOTILITY-FIMBRIAE_SYSTEM# PGPT	PGPT0016035-fimC-K07346	0	0	0	1
PGPT0016040	INDIRECT_EFFECTS	COLONIZING_PLANT_SYSTEM	COLONIZATION-MOTILITY|CHEMOTAXIS	MOTILITY-PILUS|FIMBRIAE_SYSTEM	MOTILITY-FIMBRIAE_SYSTEM# PGPT	PGPT0016040-fimD|fimC|mrkC|htrE|cssD-K07347	0	0	0	2
PGPT0016065	INDIRECT_EFFECTS	COLONIZING_PLANT_SYSTEM	COLONIZATION-MOTILITY|CHEMOTAXIS	MOTILITY-PILUS|FIMBRIAE_SYSTEM	MOTILITY-FIMBRIAE_SYSTEM# PGPT	PGPT0016065-fimT-K08084	0	2	0	0
PGPT0016075	INDIRECT_EFFECTS	COLONIZING_PLANT_SYSTEM	COLONIZATION-MOTILITY|CHEMOTAXIS	MOTILITY-PILUS|FIMBRIAE_SYSTEM	MOTILITY-FIMBRIAE_SYSTEM# PGPT	PGPT0016075-fimV-K08086	0	2	0	0
PGPT0016145	INDIRECT_EFFECTS	COLONIZING_PLANT_SYSTEM	COLONIZATION-MOTILITY|CHEMOTAXIS	MOTILITY-PILUS|FIMBRIAE_SYSTEM	MOTILITY-TYPE_IVa_PILUS_HOMOLOGOUS_SYSTEM# PGPT	PGPT0016145-ppdD-K02682	0	0	0	1
PGPT0016180	INDIRECT_EFFECTS	COLONIZING_PLANT_SYSTEM	COLONIZATION-MOTILITY|CHEMOTAXIS	MOTILITY-PILUS|FIMBRIAE_SYSTEM	MOTILITY-TYPE_IVa_PILUS_HOMOLOGOUS_SYSTEM# PGPT	PGPT0016180-hofQ-K02507	0	0	0	1
PGPT0016185	INDIRECT_EFFECTS	COLONIZING_PLANT_SYSTEM	COLONIZATION-MOTILITY|CHEMOTAXIS	OTHER_MOTILITY_REGULATING_FUNCTIONS	MOTILITY-TEMPERATURE_DEPENDENT_REGULATION	PGPT0016185-hosA-K22489	0	0	2	0
PGPT0016195	INDIRECT_EFFECTS	COLONIZING_PLANT_SYSTEM	COLONIZATION-MOTILITY|CHEMOTAXIS	OTHER_MOTILITY_REGULATING_FUNCTIONS	MOTILITY-SWARMING_REGULATOR# PGPT	PGPT0016195-swrC|yerP-K03296	0	2	3	0
PGPT0016200	INDIRECT_EFFECTS	COLONIZING_PLANT_SYSTEM	COLONIZATION-MOTILITY|CHEMOTAXIS	OTHER_MOTILITY_REGULATING_FUNCTIONS	MOTILITY-SWARMING_REGULATOR	PGPT0016200-ycdX-K04477	2	0	0	0
PGPT0016205	INDIRECT_EFFECTS	COLONIZING_PLANT_SYSTEM	COLONIZATION-MOTILITY|CHEMOTAXIS	OTHER_MOTILITY_REGULATING_FUNCTIONS	MOTILITY-SWARMING_REGULATOR	PGPT0016205-efp-K02356	1	1	1	1
PGPT0016210	INDIRECT_EFFECTS	COLONIZING_PLANT_SYSTEM	COLONIZATION-MOTILITY|CHEMOTAXIS	OTHER_MOTILITY_REGULATING_FUNCTIONS	MOTILITY-SWARMING_REGULATOR# PGPT	PGPT0016210-ycgR-K21087	0	1	0	0
PGPT0016220	INDIRECT_EFFECTS	COLONIZING_PLANT_SYSTEM	COLONIZATION-MOTILITY|CHEMOTAXIS	OTHER_MOTILITY_REGULATING_FUNCTIONS	MOTILITY-QUORUMSENSING_RELATED_REGULATION# PGPT	PGPT0016220-cdgJ-K07181	1	0	0	0
PGPT0016255	INDIRECT_EFFECTS	COLONIZING_PLANT_SYSTEM	COLONIZATION-MOTILITY|CHEMOTAXIS	OTHER_MOTILITY_REGULATING_FUNCTIONS	MOTILITY-QUORUMSENSING_RELATED_REGULATION# PGPT	PGPT0016255-sylA-K06075	1	4	4	1
PGPT0016265	INDIRECT_EFFECTS	COLONIZING_PLANT_SYSTEM	COLONIZATION-MOTILITY|CHEMOTAXIS	OTHER_MOTILITY_REGULATING_FUNCTIONS	OTHER_MOTILITY_REGULATION# PGPT	PGPT0016265-luxS-K07173	0	0	0	1
PGPT0016295	INDIRECT_EFFECTS	COLONIZING_PLANT_SYSTEM	COLONIZATION-PLANT_DERIVED_SUBSTRATE_USAGE	PLANT_DERIVED_CARBOHYDRATE_TRANSPORT	PLANT_DERIVED_MALTOSE|MALTODEXTRIN_TRANSPORT	PGPT0016295-malE-K10108	0	0	0	1
PGPT0016300	INDIRECT_EFFECTS	COLONIZING_PLANT_SYSTEM	COLONIZATION-PLANT_DERIVED_SUBSTRATE_USAGE	PLANT_DERIVED_CARBOHYDRATE_TRANSPORT	PLANT_DERIVED_MALTOSE|MALTODEXTRIN_TRANSPORT	PGPT0016300-malF-K10109	0	0	0	1
PGPT0016305	INDIRECT_EFFECTS	COLONIZING_PLANT_SYSTEM	COLONIZATION-PLANT_DERIVED_SUBSTRATE_USAGE	PLANT_DERIVED_CARBOHYDRATE_TRANSPORT	PLANT_DERIVED_MALTOSE|MALTODEXTRIN_TRANSPORT	PGPT0016305-malG-K10110	0	0	0	2
PGPT0016310	INDIRECT_EFFECTS	COLONIZING_PLANT_SYSTEM	COLONIZATION-PLANT_DERIVED_SUBSTRATE_USAGE	PLANT_DERIVED_CARBOHYDRATE_TRANSPORT	PLANT_DERIVED_MALTOSE|MALTODEXTRIN_TRANSPORT# PGPT	PGPT0016310-msmX|msmK|malK|sugC|ggtA|msiK-K10112	3	1	3	1
PGPT0016330	INDIRECT_EFFECTS	COLONIZING_PLANT_SYSTEM	COLONIZATION-PLANT_DERIVED_SUBSTRATE_USAGE	PLANT_DERIVED_CARBOHYDRATE_TRANSPORT	PLANT_DERIVED_REAFFINOSE|STACHYOSE|MELIBIOSE_TRANSPORT	PGPT0016330-msmE-K10117	1	0	0	0
PGPT0016335	INDIRECT_EFFECTS	COLONIZING_PLANT_SYSTEM	COLONIZATION-PLANT_DERIVED_SUBSTRATE_USAGE	PLANT_DERIVED_CARBOHYDRATE_TRANSPORT	PLANT_DERIVED_REAFFINOSE|STACHYOSE|MELIBIOSE_TRANSPORT	PGPT0016335-msmF-K10118	1	0	0	0
PGPT0016340	INDIRECT_EFFECTS	COLONIZING_PLANT_SYSTEM	COLONIZATION-PLANT_DERIVED_SUBSTRATE_USAGE	PLANT_DERIVED_CARBOHYDRATE_TRANSPORT	PLANT_DERIVED_REAFFINOSE|STACHYOSE|MELIBIOSE_TRANSPORT	PGPT0016340-msmG-K10119	1	0	0	0
PGPT0016395	INDIRECT_EFFECTS	COLONIZING_PLANT_SYSTEM	COLONIZATION-PLANT_DERIVED_SUBSTRATE_USAGE	PLANT_DERIVED_CARBOHYDRATE_TRANSPORT	PLANT_DERIVED_ALPHA-GLUCOSIDE_TRANSPORT	PGPT0016395-aglE|ggtB-K10232	1	0	0	0
PGPT0016405	INDIRECT_EFFECTS	COLONIZING_PLANT_SYSTEM	COLONIZATION-PLANT_DERIVED_SUBSTRATE_USAGE	PLANT_DERIVED_CARBOHYDRATE_TRANSPORT	PLANT_DERIVED_ALPHA-GLUCOSIDE_TRANSPORT	PGPT0016405-aglG|ggtD-K10234	1	0	0	0
PGPT0016415	INDIRECT_EFFECTS	COLONIZING_PLANT_SYSTEM	COLONIZATION-PLANT_DERIVED_SUBSTRATE_USAGE	PLANT_DERIVED_CARBOHYDRATE_TRANSPORT	PLANT_DERIVED_N_ACETYLGLUCOSAMINE_TRANSPORT	PGPT0016415-ngcE|ABC_NGC_S-K10200	1	0	0	0
PGPT0016420	INDIRECT_EFFECTS	COLONIZING_PLANT_SYSTEM	COLONIZATION-PLANT_DERIVED_SUBSTRATE_USAGE	PLANT_DERIVED_CARBOHYDRATE_TRANSPORT	PLANT_DERIVED_N_ACETYLGLUCOSAMINE_TRANSPORT	PGPT0016420-ngcF|ABC_NGC_P-K10201	1	0	0	0
PGPT0016425	INDIRECT_EFFECTS	COLONIZING_PLANT_SYSTEM	COLONIZATION-PLANT_DERIVED_SUBSTRATE_USAGE	PLANT_DERIVED_CARBOHYDRATE_TRANSPORT	PLANT_DERIVED_N_ACETYLGLUCOSAMINE_TRANSPORT	PGPT0016425-ngcG|ABC_NGC_P1-K10202	1	0	0	0
PGPT0016455	INDIRECT_EFFECTS	COLONIZING_PLANT_SYSTEM	COLONIZATION-PLANT_DERIVED_SUBSTRATE_USAGE	PLANT_DERIVED_CARBOHYDRATE_TRANSPORT	PLANT_DERIVED_CHITOBIOSE_TRANSPORT_I	PGPT0016455-dasC-K17331	1	0	0	0
PGPT0016471	INDIRECT_EFFECTS	COLONIZING_PLANT_SYSTEM	COLONIZATION-PLANT_DERIVED_SUBSTRATE_USAGE	PLANT_DERIVED_CARBOHYDRATE_TRANSPORT	PLANT_DERIVED_CHITOBIOSE_TRANSPORT_III	PGPT0016471-chiP-NA	0	0	0	1
PGPT0016475	INDIRECT_EFFECTS	COLONIZING_PLANT_SYSTEM	COLONIZATION-PLANT_DERIVED_SUBSTRATE_USAGE	PLANT_DERIVED_CARBOHYDRATE_TRANSPORT	PLANT_DERIVED_GLUCARATE_TRANSPORT	PGPT0016475-gudP-K03535	0	2	2	2
PGPT0016535	INDIRECT_EFFECTS	COLONIZING_PLANT_SYSTEM	COLONIZATION-PLANT_DERIVED_SUBSTRATE_USAGE	PLANT_DERIVED_CARBOHYDRATE_TRANSPORT	PLANT_DERIVED_MULTIPLE_SUGAR_TRANSPORT_III	PGPT0016535-ABC_MS_P-K02025	0	1	7	3
PGPT0016540	INDIRECT_EFFECTS	COLONIZING_PLANT_SYSTEM	COLONIZATION-PLANT_DERIVED_SUBSTRATE_USAGE	PLANT_DERIVED_CARBOHYDRATE_TRANSPORT	PLANT_DERIVED_MULTIPLE_SUGAR_TRANSPORT_III	PGPT0016540-ABC_MS_P1-K02026	1	1	7	2
PGPT0016545	INDIRECT_EFFECTS	COLONIZING_PLANT_SYSTEM	COLONIZATION-PLANT_DERIVED_SUBSTRATE_USAGE	PLANT_DERIVED_CARBOHYDRATE_TRANSPORT	PLANT_DERIVED_MULTIPLE_SUGAR_TRANSPORT_III	PGPT0016545-ABC_MS_S-K02027	1	1	8	1
PGPT0016585	INDIRECT_EFFECTS	COLONIZING_PLANT_SYSTEM	COLONIZATION-PLANT_DERIVED_SUBSTRATE_USAGE	PLANT_DERIVED_CARBOHYDRATE_TRANSPORT	PLANT_DERIVED_GLUCOSE|MANNOSE_TRANSPORT_II# PGPT	PGPT0016585-glpP-K17322	0	1	0	0
PGPT0016590	INDIRECT_EFFECTS	COLONIZING_PLANT_SYSTEM	COLONIZATION-PLANT_DERIVED_SUBSTRATE_USAGE	PLANT_DERIVED_CARBOHYDRATE_TRANSPORT	PLANT_DERIVED_RIBOSE|AUTOINDUCER|XYLOSE_TRANSPORT	PGPT0016590-rbsC-K10440	0	0	1	3
PGPT0016595	INDIRECT_EFFECTS	COLONIZING_PLANT_SYSTEM	COLONIZATION-PLANT_DERIVED_SUBSTRATE_USAGE	PLANT_DERIVED_CARBOHYDRATE_TRANSPORT	PLANT_DERIVED_RIBOSE|AUTOINDUCER|XYLOSE_TRANSPORT# PGPT	PGPT0016595-rbsD-K06726	0	0	0	1
PGPT0016600	INDIRECT_EFFECTS	COLONIZING_PLANT_SYSTEM	COLONIZATION-PLANT_DERIVED_SUBSTRATE_USAGE	PLANT_DERIVED_CARBOHYDRATE_TRANSPORT	PLANT_DERIVED_RIBOSE|AUTOINDUCER|XYLOSE_TRANSPORT	PGPT0016600-rbsA-K10441	0	0	1	2
PGPT0016625	INDIRECT_EFFECTS	COLONIZING_PLANT_SYSTEM	COLONIZATION-PLANT_DERIVED_SUBSTRATE_USAGE	PLANT_DERIVED_CARBOHYDRATE_TRANSPORT	PLANT_DERIVED_GALACTOFURANOSE_TRANSPORT	PGPT0016625-ytfQ-K23508	0	0	0	1
PGPT0016630	INDIRECT_EFFECTS	COLONIZING_PLANT_SYSTEM	COLONIZATION-PLANT_DERIVED_SUBSTRATE_USAGE	PLANT_DERIVED_CARBOHYDRATE_TRANSPORT	PLANT_DERIVED_GALACTOFURANOSE_TRANSPORT	PGPT0016630-ytfT|yjfF-K23509	0	0	0	1
PGPT0016635	INDIRECT_EFFECTS	COLONIZING_PLANT_SYSTEM	COLONIZATION-PLANT_DERIVED_SUBSTRATE_USAGE	PLANT_DERIVED_CARBOHYDRATE_TRANSPORT	PLANT_DERIVED_GALACTOFURANOSE_TRANSPORT	PGPT0016635-ytfR-K10820	0	0	0	1
PGPT0016640	INDIRECT_EFFECTS	COLONIZING_PLANT_SYSTEM	COLONIZATION-PLANT_DERIVED_SUBSTRATE_USAGE	PLANT_DERIVED_CARBOHYDRATE_TRANSPORT	PLANT_DERIVED_METHYL-GALACTOSIDE_TRANSPORT	PGPT0016640-mglC-K10541	0	0	0	2
PGPT0016645	INDIRECT_EFFECTS	COLONIZING_PLANT_SYSTEM	COLONIZATION-PLANT_DERIVED_SUBSTRATE_USAGE	PLANT_DERIVED_CARBOHYDRATE_TRANSPORT	PLANT_DERIVED_METHYL-GALACTOSIDE_TRANSPORT	PGPT0016645-mglA-K10542	0	0	0	2
PGPT0016650	INDIRECT_EFFECTS	COLONIZING_PLANT_SYSTEM	COLONIZATION-PLANT_DERIVED_SUBSTRATE_USAGE	PLANT_DERIVED_CARBOHYDRATE_TRANSPORT	PLANT_DERIVED_XYLOSE_TRANSPORT_I	PGPT0016650-xylF-K10543	1	0	0	1
PGPT0016655	INDIRECT_EFFECTS	COLONIZING_PLANT_SYSTEM	COLONIZATION-PLANT_DERIVED_SUBSTRATE_USAGE	PLANT_DERIVED_CARBOHYDRATE_TRANSPORT	PLANT_DERIVED_XYLOSE_TRANSPORT_I	PGPT0016655-xylH-K10544	1	0	0	1
PGPT0016660	INDIRECT_EFFECTS	COLONIZING_PLANT_SYSTEM	COLONIZATION-PLANT_DERIVED_SUBSTRATE_USAGE	PLANT_DERIVED_CARBOHYDRATE_TRANSPORT	PLANT_DERIVED_XYLOSE_TRANSPORT_I	PGPT0016660-xylG-K10545	1	0	0	2
PGPT0016690	INDIRECT_EFFECTS	COLONIZING_PLANT_SYSTEM	COLONIZATION-PLANT_DERIVED_SUBSTRATE_USAGE	PLANT_DERIVED_CARBOHYDRATE_TRANSPORT	PLANT_DERIVED_RHAMNOSE_TRANSPORT	PGPT0016690-rhaP-K10560	1	0	0	0
PGPT0016695	INDIRECT_EFFECTS	COLONIZING_PLANT_SYSTEM	COLONIZATION-PLANT_DERIVED_SUBSTRATE_USAGE	PLANT_DERIVED_CARBOHYDRATE_TRANSPORT	PLANT_DERIVED_RHAMNOSE_TRANSPORT	PGPT0016695-rhaQ-K10561	1	0	0	0
PGPT0016700	INDIRECT_EFFECTS	COLONIZING_PLANT_SYSTEM	COLONIZATION-PLANT_DERIVED_SUBSTRATE_USAGE	PLANT_DERIVED_CARBOHYDRATE_TRANSPORT	PLANT_DERIVED_RHAMNOSE_TRANSPORT	PGPT0016700-rhaS-K10559	1	0	0	0
PGPT0016705	INDIRECT_EFFECTS	COLONIZING_PLANT_SYSTEM	COLONIZATION-PLANT_DERIVED_SUBSTRATE_USAGE	PLANT_DERIVED_CARBOHYDRATE_TRANSPORT	PLANT_DERIVED_RHAMNOSE_TRANSPORT	PGPT0016705-rhaT-K10562	1	0	0	0
PGPT0016785	INDIRECT_EFFECTS	COLONIZING_PLANT_SYSTEM	COLONIZATION-PLANT_DERIVED_SUBSTRATE_USAGE	PLANT_DERIVED_SUGAR_ALCOHOL_UTILIZATION	PLANT_DERIVED_INOSITOL_DERIVATE_DEGRADATION# PGPT	PGPT0016785-mocC-K03335	3	0	1	1
PGPT0016788	INDIRECT_EFFECTS	COMPETITIVE_EXCLUSION|CE	CE-BACTERIAL_FITNESS	CE-BACTERIAL_FITNESS-RHIZOPINE_METABOLISM	CE-BACTERIAL_FITNESS-RHIZOPINE_BIOSYNTHESIS	PGPT0016788-mosC-NA	1	1	0	0
PGPT0016790	INDIRECT_EFFECTS	COLONIZING_PLANT_SYSTEM	COLONIZATION-PLANT_DERIVED_SUBSTRATE_USAGE	PLANT_DERIVED_SUGAR_ALCOHOL_UTILIZATION	PLANT_DERIVED_INOSITOL_DERIVATE_DEGRADATION# PGPT	PGPT0016790-mocR-K00375	1	3	3	1
PGPT0016805	INDIRECT_EFFECTS	COLONIZING_PLANT_SYSTEM	COLONIZATION-PLANT_DERIVED_SUBSTRATE_USAGE	PLANT_DERIVED_CARBOHYDRATE_TRANSPORT	PLANT_DERIVED_GLYCEROL_TRANSPORT# PGPT	PGPT0016805-glpV-K17321	0	1	0	0
PGPT0016810	INDIRECT_EFFECTS	COLONIZING_PLANT_SYSTEM	COLONIZATION-PLANT_DERIVED_SUBSTRATE_USAGE	PLANT_DERIVED_CARBOHYDRATE_TRANSPORT	PLANT_DERIVED_GLYCEROL_TRANSPORT# PGPT	PGPT0016810-glpQ-K17323	0	1	0	0
PGPT0016815	INDIRECT_EFFECTS	COLONIZING_PLANT_SYSTEM	COLONIZATION-PLANT_DERIVED_SUBSTRATE_USAGE	PLANT_DERIVED_CARBOHYDRATE_TRANSPORT	PLANT_DERIVED_GLYCEROL_TRANSPORT# PGPT	PGPT0016815-glpS-K17324	0	1	0	0
PGPT0016820	INDIRECT_EFFECTS	COLONIZING_PLANT_SYSTEM	COLONIZATION-PLANT_DERIVED_SUBSTRATE_USAGE	PLANT_DERIVED_CARBOHYDRATE_TRANSPORT	PLANT_DERIVED_GLYCEROL_TRANSPORT# PGPT	PGPT0016820-glpT-K17325	0	1	0	0
PGPT0016821	INDIRECT_EFFECTS	COLONIZING_PLANT_SYSTEM	COLONIZATION-PLANT_DERIVED_SUBSTRATE_USAGE	PLANT_DERIVED_CARBOHYDRATE_TRANSPORT	PLANT_DERIVED_GLYCEROL_TRANSPORT# PGPT	PGPT0016821-glpT-K02445	0	0	0	1
PGPT0016830	INDIRECT_EFFECTS	COLONIZING_PLANT_SYSTEM	COLONIZATION-PLANT_DERIVED_SUBSTRATE_USAGE	PLANT_DERIVED_CARBOHYDRATE_TRANSPORT	PLANT_DERIVED_MALTODEXTRIN_TRANSPORT	PGPT0016830-lamB-K02024	0	1	0	2
PGPT0016835	INDIRECT_EFFECTS	COLONIZING_PLANT_SYSTEM	COLONIZATION-PLANT_DERIVED_SUBSTRATE_USAGE	PLANT_DERIVED_CARBOHYDRATE_TRANSPORT	PLANT_DERIVED_sn-GLYCEROL-3P_TRANSPORT	PGPT0016835-ugpB-K05813	0	1	3	1
PGPT0016840	INDIRECT_EFFECTS	COLONIZING_PLANT_SYSTEM	COLONIZATION-PLANT_DERIVED_SUBSTRATE_USAGE	PLANT_DERIVED_CARBOHYDRATE_TRANSPORT	PLANT_DERIVED_sn-GLYCEROL-3P_TRANSPORT	PGPT0016840-ugpA-K05814	0	1	3	3
PGPT0016845	INDIRECT_EFFECTS	COLONIZING_PLANT_SYSTEM	COLONIZATION-PLANT_DERIVED_SUBSTRATE_USAGE	PLANT_DERIVED_CARBOHYDRATE_TRANSPORT	PLANT_DERIVED_sn-GLYCEROL-3P_TRANSPORT	PGPT0016845-ugpE-K05815	0	1	3	2
PGPT0016850	INDIRECT_EFFECTS	COLONIZING_PLANT_SYSTEM	COLONIZATION-PLANT_DERIVED_SUBSTRATE_USAGE	PLANT_DERIVED_CARBOHYDRATE_TRANSPORT	PLANT_DERIVED_sn-GLYCEROL-3P_TRANSPORT	PGPT0016850-ugpC-K05816	0	1	2	1
PGPT0016860	INDIRECT_EFFECTS	COLONIZING_PLANT_SYSTEM	COLONIZATION-PLANT_DERIVED_SUBSTRATE_USAGE	PLANT_DERIVED_CARBOHYDRATE_TRANSPORT	PLANT_DERIVED_N_ACETYLGLUCOSAMINE_PTS_SYSTEM	PGPT0016860-nagE|nagP-K02804	0	0	0	1
PGPT0016870	INDIRECT_EFFECTS	COLONIZING_PLANT_SYSTEM	COLONIZATION-PLANT_DERIVED_SUBSTRATE_USAGE	PLANT_DERIVED_CARBOHYDRATE_TRANSPORT	PLANT_DERIVED_GLUCOSE_PTS_SYSTEM_I# PGPT	PGPT0016870-ptsG|glcA|glcB-K20118	0	0	0	3
PGPT0016875	INDIRECT_EFFECTS	COLONIZING_PLANT_SYSTEM	COLONIZATION-PLANT_DERIVED_SUBSTRATE_USAGE	PLANT_DERIVED_CARBOHYDRATE_TRANSPORT	PLANT_DERIVED_GLUCOSE_PTS_SYSTEM_I	PGPT0016875-ptsH-K02784	1	1	1	3
PGPT0016905	INDIRECT_EFFECTS	COLONIZING_PLANT_SYSTEM	COLONIZATION-PLANT_DERIVED_SUBSTRATE_USAGE	PLANT_DERIVED_CARBOHYDRATE_TRANSPORT	PLANT_DERIVED_MALTOSE|GLUCOSE_PTS_SYSTEM# PGPT	PGPT0016905-malX-K02791	0	0	0	3
PGPT0016925	INDIRECT_EFFECTS	COLONIZING_PLANT_SYSTEM	COLONIZATION-PLANT_DERIVED_SUBSTRATE_USAGE	PLANT_DERIVED_CARBOHYDRATE_TRANSPORT	PLANT_DERIVED_BETA-GLUCOSIDE_PTS_SYSTEM_II# PGPT	PGPT0016925-ascF-K02753	0	0	0	2
PGPT0016930	INDIRECT_EFFECTS	COLONIZING_PLANT_SYSTEM	COLONIZATION-PLANT_DERIVED_SUBSTRATE_USAGE	PLANT_DERIVED_CARBOHYDRATE_TRANSPORT	PLANT_DERIVED_ALPHA-GLUCOSIDE_PTS_SYSTEM# PGPT	PGPT0016930-glvC|malP|aglA-K02750	0	0	0	3
PGPT0016945	INDIRECT_EFFECTS	COLONIZING_PLANT_SYSTEM	COLONIZATION-PLANT_DERIVED_SUBSTRATE_USAGE	PLANT_DERIVED_CARBOHYDRATE_TRANSPORT	PLANT_DERIVED_MANNITOL_PTS_SYSTEM# PGPT	PGPT0016945-mtlA|cmtA-K02800	2	0	0	1
PGPT0016950	INDIRECT_EFFECTS	COLONIZING_PLANT_SYSTEM	COLONIZATION-PLANT_DERIVED_SUBSTRATE_USAGE	PLANT_DERIVED_CARBOHYDRATE_TRANSPORT	PLANT_DERIVED_MANNOSYL-GLYCERATE_PTS_SYSTEM	PGPT0016950-mngA|hrsA-K11200	0	0	0	1
PGPT0016955	INDIRECT_EFFECTS	COLONIZING_PLANT_SYSTEM	COLONIZATION-PLANT_DERIVED_SUBSTRATE_USAGE	PLANT_DERIVED_CARBOHYDRATE_TRANSPORT	PLANT_DERIVED_MANNOSYL-GLYCERATE_PTS_SYSTEM	PGPT0016955-mngR|farR-K11922	0	1	0	3
PGPT0016970	INDIRECT_EFFECTS	COLONIZING_PLANT_SYSTEM	COLONIZATION-PLANT_DERIVED_SUBSTRATE_USAGE	PLANT_DERIVED_CARBOHYDRATE_TRANSPORT	PLANT_DERIVED_CELLOBIOSE|DIACETYLCHITOBIOSE_PTS_SYSTEM# PGPT	PGPT0016970-celB|chbC-K02761	0	0	0	6
[truncated: 1,054 more rows]

## Sheet: Table S6
Table S6. Comparative Analysis of Defense System Genes in Cerrado Strains
[truncated: 165 more rows]

[truncated: 2 more sheets: Table S7, Table S8]
